# Supplementary material for: Kinetic resolution of primary allylic amines via palladium-catalyzed asymmetric allylic alkylation of malononitriles
Source: Royal Society of Chemistry journal article supplement (doi:10.1039/c5ob00671f), 2015-01-01
Supplement: c5ob00671f1.pdf [file c5ob00671f1.pdf]

## Kinetic resolution of primary allylic amines via palladium-catalyzed asymmetric allylic alkylation of malononitriles

Yong Wang, Ya-Nan Xu, Guo-Sheng Fang, Hong-Jian Kang, Yonghong Gu\* and Shi-Kai Tian\*

Department of Chemistry, University of Science and Technology of China, Hefei, Anhui 230026, China

### Supporting information

#### Table of contents

|                                                                                       |       |
|---------------------------------------------------------------------------------------|-------|
| General information.....                                                              | S-2   |
| Preparation of racemic allylic amines.....                                            | S-2   |
| Survey of sulfonyl hydrazides (Scheme 2).....                                         | S-4   |
| Allylic alkylation with enantioenriched primary allylic amines (Scheme 3).....        | S-5   |
| General procedure for the kinetic resolution of primary allylic amines (Table 2)..... | S-5   |
| Analytical data for the products shown in Table 2.....                                | S-6   |
| Benzoylation of chiral amines for ee determination.....                               | S-16  |
| Enantiospecific allylic alkylation (Scheme 4).....                                    | S-22  |
| Kinetic resolution of secondary and tertiary allylic amines (Scheme 5).....           | S-22  |
| References.....                                                                       | S-24  |
| Copies of <sup>1</sup> H NMR and <sup>13</sup> C NMR spectra.....                     | S-25  |
| Copies of HPLC spectra.....                                                           | S-141 |

## General information

$^1\text{H}$  NMR and  $^{13}\text{C}$  NMR spectra were recorded on a Bruker AC-400 FT (400 MHz and 100 MHz, respectively) using tetramethylsilane as an internal reference. NMR multiplicities are abbreviated as follows: s = singlet, d = doublet, t = triplet, m = multiplet, br = broad signal. Chemical shifts ( $\delta$ ) and coupling constants ( $J$ ) were expressed in ppm and Hz, respectively. Electron spray ionization (ESI) mass spectrometry data were acquired using a Thermo LTQ Orbitrap XL instrument equipped with an ESI source and controlled by Xcalibur software. High pressure liquid chromatography (HPLC) analyses were performed on a Hewlett-Packard 1200 Series instrument equipped with an isostatic pump using a Daicel Chiralpak column (AS, AD, OD, 250 x 4.6 mm) with isopropanol/hexane as mobile phase, and the UV detection was monitored at 254 nm or 220 nm. The chiral HPLC methods were calibrated with the corresponding racemic mixtures. Optical rotations were measured on a Perkin-Elmer 343 polarimeter with a sodium lamp at  $\lambda = 589$  nm and reported as  $[\alpha]_{\text{D}}^{T^\circ\text{C}}$  ( $c = \text{g}/100$  mL, solvent). Melting points are uncorrected.

The preparation of racemic allylic amines is shown below. The highly enantioenriched allylic amines shown in Scheme 3, **1a** and *ent*-**1a**, were prepared according to our general procedure for the kinetic resolution at 56% conversion using (*S*)-BINAP and (*R*)-BINAP as the ligand, respectively. Malononitriles **2a-d**<sup>1</sup> and sulfonyl hydrazides **3a**, **3c**, and **3d**<sup>2</sup> were prepared according to literature procedures. The rest of chemicals were purchased from the Sinopharm Chemical Reagent Co., Sinocompound, Meryer, Acros, Alfa Aesar, and TCI, and used as received.

Abbreviations: Ac = acetyl. BINAP = 2,2'-bis(diphenylphosphino)-1,1'-binaphthyl. Bn = benzyl. dba = dibenzylideneacetone. DIOP = ((2,2-dimethyl-1,3-dioxolane-4,5-diyl)bis(methylene))bis(diphenylphosphine). dppb = 1,4-bis(diphenylphosphino)butane. MOP = (2'-methoxy-[1,1'-binaphthalen]-2-yl)diphenylphosphine. ms = molecular sieves. SynPhos = 6,6'-bis(diphenylphosphino)-2,2',3,3'-tetrahydro-5,5'-bibenzo[*b*][1,4]dioxine. THF = tetrahydrofuran, TMS = trimethylsilyl.

## Preparation of racemic allylic amines

Racemic allylic amines *rac*-**1f** ( $\text{R}^1 = \text{CH}_2\text{CH}=\text{CH}_2$ ,  $\text{R}^2 = \text{Ph}$ )<sup>3</sup> and *rac*-**1p** ( $\text{R}^1 = \text{Ph}$ ,  $\text{R}^2 = \text{H}$ )<sup>4</sup> were prepared according to literature procedures. Shown below are the methods for the preparation of the rest of racemic allylic amines.

### (1) Method A<sup>5</sup>

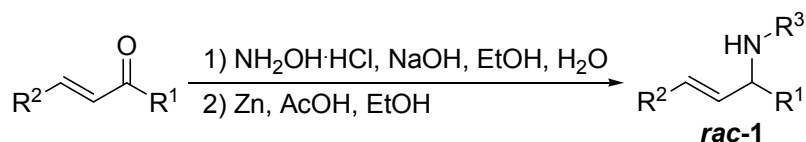

| Entry | R <sup>1</sup>                     | R <sup>2</sup> | <i>rac</i> - <b>1</b>  | Yield (%) |
|-------|------------------------------------|----------------|------------------------|-----------|
| 1     | (CH <sub>2</sub> ) <sub>3</sub> Me | Ph             | <i>rac</i> - <b>1c</b> | 64        |
| 2     | (CH <sub>2</sub> ) <sub>7</sub> Me | Ph             | <i>rac</i> - <b>1d</b> | 58        |
| 3     | (CH <sub>2</sub> ) <sub>2</sub> Ph | Ph             | <i>rac</i> - <b>1e</b> | 61        |
| 4     | Me                                 | cyclohexyl     | <i>rac</i> - <b>1o</b> | 56        |

To a mixture of hydroxylamine hydrochloride (2.08 g, 30 mmol) and an  $\alpha,\beta$ -unsaturated ketone

(25 mmol) in 80% ethanol (vol% aqueous, 20 mL) at room temperature was added sodium hydroxide (2.00 g, 50 mmol) portionwise. The mixture was heated under reflux for 10 min and then poured into ice-cooled aqueous HCl (1.7 M, 30 mL). The white solid was filtered, and washed with water to give the corresponding oxime.

To a solution of the oxime in ethanol (30 mL) and acetic acid (30 mL) was added zinc dust (3.25 g, 50 mmol) in portions and then the solution was refluxed for 1.0 h. The precipitate was filtered and washed with ethanol (2 x 50 mL). The filtrate was concentrated and the residue was dissolved in aqueous HCl (6 M, 25 mL), and extracted with dichloromethane (2 x 50 mL). The aqueous acidic layer was treated with solid sodium hydroxide (6.25 g, 156 mmol) and extracted with ether (2 x 50 mL). The combined organic extracts were dried (BaO) and concentrated to give amine *rac-1*.

(2) Method B<sup>6</sup>

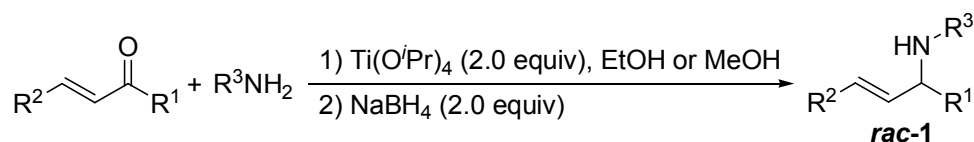

| Entry | R <sup>1</sup>                     | R <sup>2</sup>                     | R <sup>3</sup> | <i>rac-1</i>   | Yield (%) |
|-------|------------------------------------|------------------------------------|----------------|----------------|-----------|
| 1     | Et                                 | Ph                                 | H              | <i>rac-1a</i>  | 62        |
| 2     | Me                                 | Ph                                 | H              | <i>rac-1b</i>  | 68        |
| 3     | Ph                                 | Ph                                 | H              | <i>rac-1g</i>  | 76        |
| 4     | Et                                 | 4-MeOC <sub>6</sub> H <sub>4</sub> | H              | <i>rac-1h</i>  | 64        |
| 5     | Et                                 | 4-FC <sub>6</sub> H <sub>4</sub>   | H              | <i>rac-1i</i>  | 78        |
| 6     | Et                                 | 4-ClC <sub>6</sub> H <sub>4</sub>  | H              | <i>rac-1j</i>  | 61        |
| 7     | Et                                 | 4-NCC <sub>6</sub> H <sub>4</sub>  | H              | <i>rac-1k</i>  | 62        |
| 8     | Me                                 | 2-naphthyl                         | H              | <i>rac-1l</i>  | 74        |
| 9     | Et                                 | benzo[ <i>b</i> ]thien-2-yl        | H              | <i>rac-1m</i>  | 45        |
| 10    | Me                                 | ( <i>E</i> )-PhCH=CH               | H              | <i>rac-1n</i>  | 38        |
| 11    | (CH <sub>2</sub> ) <sub>2</sub> Ph | Ph                                 | Me             | <i>rac-1ea</i> | 32        |
| 12    | (CH <sub>2</sub> ) <sub>2</sub> Ph | Ph                                 | Bn             | <i>rac-1eb</i> | 28        |

A mixture of an  $\alpha,\beta$ -unsaturated ketone (3.0 mmol), titanium(IV) isopropoxide (1.82 mL, 1.71 g, 6.0 mmol), and ammonia in ethanol (2.0 M, 7.50 mL, 15 mmol) [For entry 11, methylamine in methanol (2.0 M, 7.50 mL, 15 mmol); For entry 12, benzylamine (1.64 mL, 1.61 g, 15 mmol) in methanol (7.50 mL)] was stirred under nitrogen at room temperature for 12 h. Sodium borohydride (170 mg, 4.5 mmol) was then added and the resulting mixture was stirred at room temperature for an additional 12 h. A second batch of sodium borohydride (56.7 mg, 1.5 mmol) was added and stirred for an additional 12 h. The reaction was quenched with ammonium hydroxide (2.0 M, 10 mL). The resulting precipitate (composed of inorganic byproducts) was filtered through celite and washed with ethyl acetate. The aqueous solution was acidified with aqueous 1 M HCl (PH < 4). The resulting solution was extracted with ethyl acetate (3 x 20 mL) and the organic layers were discarded. The

aqueous layer was then treated with aqueous 10% sodium hydroxide (PH = 10-12) and extracted with ethyl acetate (5 x 50 mL). The combined organic layers were washed with brine, and then dried with anhydrous sodium sulfate. The organic layer was concentrated under reduced pressure and the residue was purified by flash chromatography (99:1 ethyl acetate/triethylamine to 90:10:1 ethyl acetate/methanol/triethylamine) to give amine **rac-1**.

### (3) Method C<sup>7</sup>

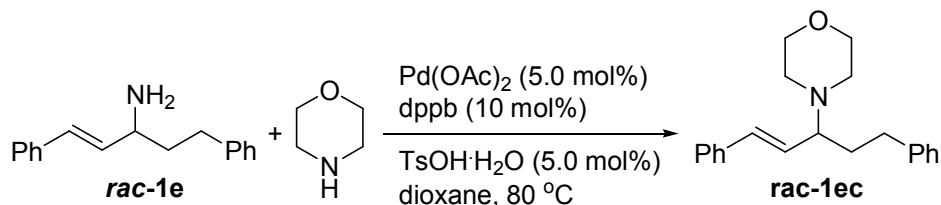

A mixture of amine **rac-1e** (237 mg, 1.0 mmol), morpholine (0.107 mL, 105 mg, 1.2 mmol), TsOH·H<sub>2</sub>O (9.51 mg, 5 mol%), dppb (42.6 mg, 10 mol%), and Pd(OAc)<sub>2</sub> (11.2 mg, 5 mol%) in dioxane (1.0 mL) was heated under nitrogen at 80 °C for 4 h. The mixture was cooled to room temperature and purified by silica gel chromatography, eluting with ethyl acetate/petroleum ether (1:20~1:2), to give amine **rac-1ec** (264 mg, 86%) as a colorless oil.

### Survey of sulfonyl hydrazides (Scheme 2)

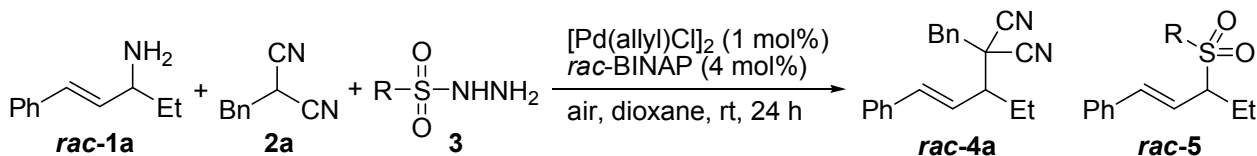

The reaction was performed following the general procedure shown below but without 5 Å molecular sieves and using racemic BINAP instead of (*S*)-BINAP as the ligand. The analytic data for the minor products, **rac-5**, were shown below.

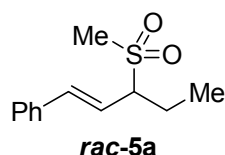

Sulfone **rac-5a**, light yellow oil; <sup>1</sup>H NMR (400 MHz, CDCl<sub>3</sub>) δ 7.45-7.41 (m, 2H), 7.39-7.29 (m, 3H), 6.70 (d, *J* = 16.0 Hz, 1H), 6.13 (dd, *J* = 16.0, 9.6 Hz, 1H), 3.56-3.49 (m, 1H), 2.86 (s, 3H), 2.34-2.23 (m, 1H), 1.88-1.76 (m, 1H), 1.05 (t, *J* = 7.6 Hz, 3H); <sup>13</sup>C NMR (100 MHz, CDCl<sub>3</sub>) δ 138.1, 135.4, 128.8, 126.7, 121.8, 70.0, 38.4, 19.7, 11.3; HRMS (ESI) calcd for C<sub>12</sub>H<sub>16</sub>O<sub>2</sub>Na<sup>+</sup> (M+Na)<sup>+</sup> 247.07632, found 247.07597.

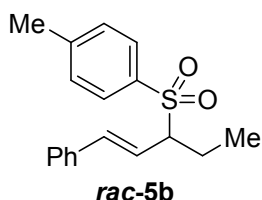

Sulfone **rac-5b**,<sup>5</sup> white solid; m.p. 66-67 °C; <sup>1</sup>H NMR (400 MHz, CDCl<sub>3</sub>) δ 7.71 (d, *J* = 8.4 Hz, 2H), 7.34-7.27 (m, 7H), 6.31 (d, *J* = 16.0 Hz, 1H), 5.90 (dd, *J* = 16.0, 9.6 Hz, 1H), 3.57-3.51 (m, 1H), 2.42 (s, 3H), 2.30-2.20 (m, 1H), 1.80-1.70 (m, 1H), 0.98 (t, *J* = 7.2 Hz, 3H); <sup>13</sup>C NMR (100 MHz, CDCl<sub>3</sub>) δ 144.5, 138.1, 136.0, 134.7, 129.5, 129.2, 128.6, 126.6, 121.2, 71.1, 21.6, 21.0, 11.4.

### Allylic alkylation with enantioenriched primary allylic amines (Scheme 3)

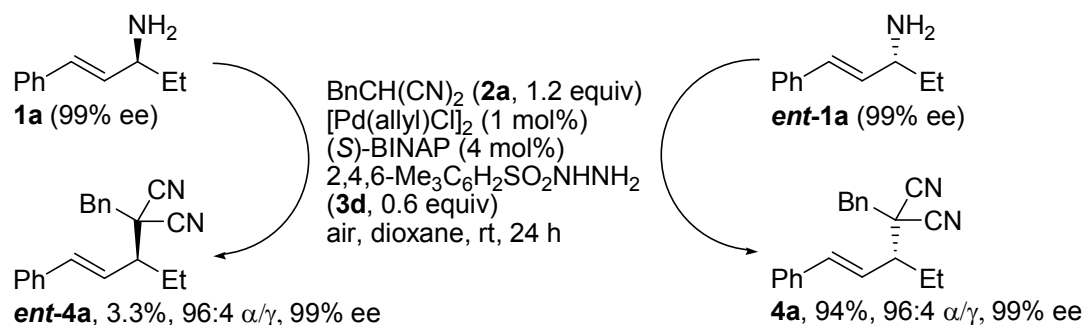

The reaction was performed following the general procedure shown below but without 5 Å molecular sieves.

### General procedure for the kinetic resolution of primary allylic amines (Table 2)

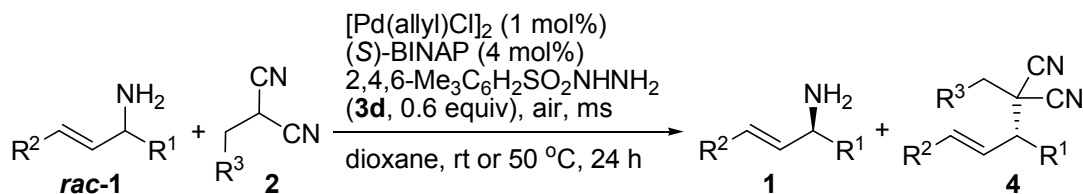

A mixture of racemic primary allylic amine **rac-1** (0.30 mmol), malononitrile **2** (0.18 mmol), mesitylsulfonyl hydrazide (**3d**) (12.9 mg, 0.060 mmol), 5 Å molecular sieves (30 mg), (S)-BINAP (7.5 mg, 4 mol%), and [Pd(allyl)Cl]<sub>2</sub> (1.1 mg, 1 mol%) in dioxane (1.8 mL) was stirred under air at room temperature or at 50 °C for 4 h. A second batch of mesitylsulfonyl hydrazide (**3d**) (12.9 mg, 0.060 mmol) was added, and 4 h later a third batch of mesitylsulfonyl hydrazide (**3d**) (12.9 mg, 0.060 mmol) was added. The resulting mixture was stirred for 12 h, and quenched with aqueous HCl (2.0 M, 5.0 mL) solution. The organic layer was separated and the aqueous layer was extracted with ethyl acetate (2 x 5.0 mL). The organic layers were combined, dried over anhydrous sodium sulfate, and concentrated under reduced pressure. The residue was purified by silica gel chromatography, eluting with ethyl acetate/petroleum ether (1:20~1:40), to give malononitrile **4**. The  $\alpha/\gamma$  selectivity for the formation of malononitrile **4** was determined by integrating the allylic proton signals in the <sup>1</sup>H NMR spectra of the crude product, and in each case the  $\alpha$ -product **4** was separated from the  $\gamma$ -product by silica gel chromatography.

The aqueous layer was basified with 15% aqueous NaOH (pH = 10) and extraction with diethyl ether (5 x 10 mL). The combined organic layers were washed with brine, dried over anhydrous sodium sulfate, and concentrated under reduced pressure. The residue was purified by silica gel chromatography, eluting with ethyl acetate/triethylamine (100:1), to give chiral amine **1**.

The absolute configuration of compounds **1b**, **1g**, **1p**, **4b**, and **4o** was assigned by comparison of the optical rotation (or the chiral HPLC trace) with that reported in the literature (see below) and that of compounds **1a**, **1b**, **1e**, **1f**, **1g**, **1l**, **1n**, **1o**, and **1p** was assigned by benzoylation. The absolute

configuration of the rest of new products shown in Table 2 was assigned by analogy.

### Analytical data for the products shown in Table 2

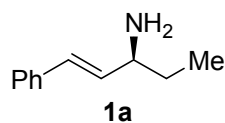

Amine **1a**,<sup>6</sup> light yellow oil;  $[\alpha]_{\text{D}}^{20} = -18.4$  ( $c = 1.05$ ,  $\text{CHCl}_3$ );  $^1\text{H NMR}$  (400 MHz,  $\text{CDCl}_3$ )  $\delta$  7.40-7.35 (m, 2H), 7.33-7.27 (m, 2H), 7.24-7.18 (m, 1H), 6.47 (d,  $J = 16.0$  Hz, 1H), 6.14 (dd,  $J = 16.0$ , 7.2 Hz, 1H), 3.43-3.35 (m, 1H), 1.59-1.50 (m, 2H), 0.94 (t,  $J = 7.2$  Hz, 3H);  $^{13}\text{C NMR}$  (100 MHz,  $\text{CDCl}_3$ )  $\delta$  137.1, 134.1, 129.5, 128.5, 127.3, 126.3, 55.6, 30.5, 10.5. The ee was determined to be 95% by converting it to compound **1Bz-a** (see below).

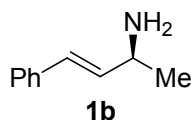

Amine **1b**,<sup>8</sup> light yellow oil;  $[\alpha]_{\text{D}}^{20} = -19.6$  ( $c = 1.01$ ,  $\text{CHCl}_3$ ); Lit.<sup>8</sup>:  $[\alpha]_{\text{D}}^{20} = 25.8$  ( $c = 1.16$ ,  $\text{CHCl}_3$ , *R*-enantiomer, >99% ee);  $^1\text{H NMR}$  (400 MHz,  $\text{CDCl}_3$ )  $\delta$  7.38-7.34 (m, 2H), 7.33-7.27 (m, 2H), 7.24-7.18 (m, 1H), 6.46 (d,  $J = 16.0$  Hz, 1H), 6.20 (dd,  $J = 16.0$ , 6.8 Hz, 1H), 3.70-3.62 (m, 1H), 1.25 (d,  $J = 6.8$  Hz, 3H);  $^{13}\text{C NMR}$  (100 MHz,  $\text{CDCl}_3$ )  $\delta$  137.2, 136.2, 128.5, 127.8, 127.3, 126.2, 49.3, 23.9. The ee was determined to be 97% by converting it to compound **1Bz-b** (see below).

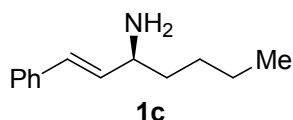

Amine **1c**, light yellow oil;  $[\alpha]_{\text{D}}^{20} = -28.7$  ( $c = 1.04$ ,  $\text{CHCl}_3$ );  $^1\text{H NMR}$  (400 MHz,  $\text{CDCl}_3$ )  $\delta$  7.40-7.35 (m, 2H), 7.33-7.27 (m, 2H), 7.24-7.19 (m, 1H), 6.46 (d,  $J = 16.0$  Hz, 1H), 6.14 (dd,  $J = 16.0$ , 7.6 Hz, 1H), 3.49-3.42 (m, 1H), 1.53-1.46 (m, 2H), 1.39-1.28 (m, 4H), 0.90 (t,  $J = 7.2$  Hz, 3H);  $^{13}\text{C NMR}$  (100 MHz,  $\text{CDCl}_3$ )  $\delta$  137.2, 135.1, 128.9, 128.5, 127.3, 126.2, 54.2, 37.6, 28.4, 22.7, 14.1; HRMS (ESI) calcd for  $\text{C}_{13}\text{H}_{20}\text{N}^+$  ( $\text{M}+\text{H}$ )<sup>+</sup> 190.15903, found 190.15872. The ee was determined to be 90% by converting it to compound **1Bz-c** (see below).

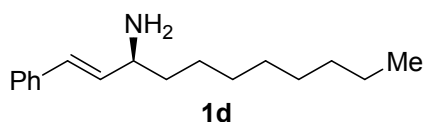

Amine **1d**, light yellow oil;  $[\alpha]_{\text{D}}^{20} = -21.5$  ( $c = 1.05$ ,  $\text{CHCl}_3$ );  $^1\text{H NMR}$  (400 MHz,  $\text{CDCl}_3$ )  $\delta$  7.40-7.36 (m, 2H), 7.34-7.27 (m, 2H), 7.24-7.19 (m, 1H), 6.46 (d,  $J = 16.0$  Hz, 1H), 6.14 (dd,  $J = 16.0$ , 7.2 Hz, 1H), 3.49-3.42 (m, 1H), 1.55-1.46 (m, 2H), 1.38-1.19 (m, 12H), 0.87 (t,  $J = 6.4$  Hz, 3H);  $^{13}\text{C NMR}$  (100 MHz,  $\text{CDCl}_3$ )  $\delta$  137.2, 135.1, 128.9, 128.5, 127.3, 126.2, 54.2, 37.9, 31.9, 29.7, 29.6, 29.3, 26.2, 22.7, 14.1; HRMS (ESI) calcd for  $\text{C}_{17}\text{H}_{27}\text{NNa}^+$  ( $\text{M}+\text{Na}$ )<sup>+</sup> 268.20357, found 268.20374.

The ee was determined to be 96% by converting it to compound **1Bz-d** (see below).

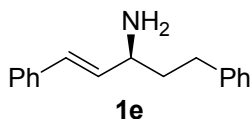

Amine **1e**, light yellow oil;  $[\alpha]_D^{20} = -18.9$  ( $c = 1.04$ ,  $\text{CHCl}_3$ );  $^1\text{H NMR}$  (400 MHz,  $\text{CDCl}_3$ )  $\delta$  7.40-7.36 (m, 2H), 7.34-7.26 (m, 4H), 7.25-7.16 (m, 4H), 6.49 (d,  $J = 16.0$  Hz, 1H), 6.17 (dd,  $J = 16.0$ , 7.2 Hz, 1H), 3.53-3.47 (m, 1H), 2.75-2.65 (m, 2H), 1.90-1.80 (m, 2H);  $^{13}\text{C NMR}$  (100 MHz,  $\text{CDCl}_3$ )  $\delta$  142.0, 137.1, 134.7, 129.4, 128.6, 128.4, 127.4, 126.3, 125.8, 53.7, 39.4, 32.5; HRMS (ESI) calcd for  $\text{C}_{17}\text{H}_{20}\text{N}^+$  ( $\text{M}+\text{H}$ ) $^+$  238.15903, found 238.15904. The ee was determined to be 94% by converting it to compound **1Bz-e** (see below).

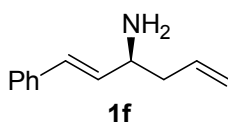

Amine **1f**,<sup>3</sup> light yellow oil;  $[\alpha]_D^{20} = -21.3$  ( $c = 1.06$ ,  $\text{CHCl}_3$ );  $^1\text{H NMR}$  (400 MHz,  $\text{CDCl}_3$ )  $\delta$  7.39-7.35 (m, 2H), 7.33-7.27 (m, 2H), 7.25-7.19 (m, 1H), 6.51 (d,  $J = 16.0$  Hz, 1H), 6.20 (dd,  $J = 16.0$ , 6.8 Hz, 1H), 5.88-5.76 (m, 1H), 5.19-5.06 (m, 2H), 3.62-3.53 (m, 1H), 2.40-2.31 (m, 1H), 2.28-2.19 (m, 1H);  $^{13}\text{C NMR}$  (100 MHz,  $\text{CDCl}_3$ )  $\delta$  137.1, 135.0, 134.2, 129.0, 128.6, 127.3, 126.3, 117.8, 53.2, 42.5. The ee was determined to be 60% by converting it to compound **1Bz-f** (see below).

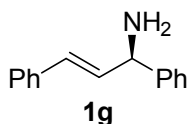

Amine **1g**,<sup>9</sup> yellow oil;  $[\alpha]_D^{20} = 15.4$  ( $c = 1.03$ ,  $\text{CHCl}_3$ );  $[\alpha]_D^{20} = 28.6$  ( $c = 1.00$ ,  $\text{CH}_2\text{Cl}_2$ ); Lit.<sup>9</sup>:  $[\alpha]_D^{20} = 44.8$  ( $c = 0.9$ ,  $\text{CH}_2\text{Cl}_2$ , *R*-enantiomer, >99% ee);  $^1\text{H NMR}$  (400 MHz,  $\text{CDCl}_3$ )  $\delta$  7.42-7.31 (m, 6H), 7.31-7.24 (m, 3H), 7.24-7.17 (m, 1H), 6.59 (d,  $J = 16.0$  Hz, 1H), 6.36 (dd,  $J = 16.0$ , 6.4 Hz, 1H), 4.69 (d,  $J = 6.4$  Hz, 1H);  $^{13}\text{C NMR}$  (100 MHz,  $\text{CDCl}_3$ )  $\delta$  144.5, 136.9, 133.8, 129.1, 128.6, 128.5, 127.4, 127.2, 126.7, 126.4, 58.0. The ee was determined to be 70% by converting it to compound **1Bz-g** (see below).

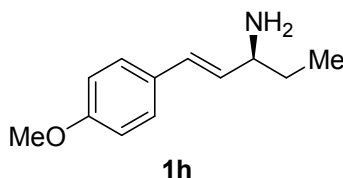

Amine **1h**, light yellow oil;  $[\alpha]_D^{20} = -32.4$  ( $c = 1.08$ ,  $\text{CHCl}_3$ );  $^1\text{H NMR}$  (400 MHz,  $\text{CDCl}_3$ )  $\delta$  7.30 (d,  $J = 8.8$  Hz, 2H), 6.84 (d,  $J = 8.8$  Hz, 2H), 6.41 (d,  $J = 16.0$  Hz, 1H), 5.99 (dd,  $J = 16.0$ , 7.2 Hz, 1H), 3.79 (s, 3H), 3.39-3.32 (m, 1H), 1.58-1.46 (m, 2H), 0.93 (t,  $J = 7.2$  Hz, 3H);  $^{13}\text{C NMR}$  (100 MHz,  $\text{CDCl}_3$ )  $\delta$  159.0, 132.5, 130.0, 128.6, 127.4, 114.0, 55.7, 55.3, 30.8, 10.6; HRMS (ESI) calcd for  $\text{C}_{12}\text{H}_{17}\text{ONNa}^+$  ( $\text{M}+\text{Na}$ ) $^+$  214.12024, found 214.12022. The ee was determined to be 85% by

converting it to compound **1Bz-h** (see below).

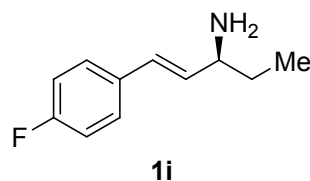

Amine **1i**, light yellow oil;  $[\alpha]_{\text{D}}^{20} = -21.4$  ( $c = 1.03$ ,  $\text{CHCl}_3$ );  $^1\text{H NMR}$  (400 MHz,  $\text{CDCl}_3$ )  $\delta$  7.36-7.30 (m, 2H), 7.02-6.95 (m, 2H), 6.47 (d,  $J = 16.0$  Hz, 1H), 6.05 (dd,  $J = 16.0, 7.2$  Hz, 1H), 3.47-3.40 (m, 1H), 2.58 (s, br, 2H), 1.67-1.51 (m, 2H), 0.93 (t,  $J = 7.6$  Hz, 3H);  $^{13}\text{C NMR}$  (100 MHz,  $\text{CDCl}_3$ )  $\delta$  162.3 (d,  $^1J_{\text{C-F}} = 245.1$  Hz), 133.1 (d,  $^4J_{\text{C-F}} = 3.4$  Hz), 132.6, 129.2, 127.9 (d,  $^3J_{\text{C-F}} = 7.9$  Hz), 115.4 (d,  $^2J_{\text{C-F}} = 21.5$  Hz), 55.6, 30.0, 10.4; HRMS (ESI) calcd for  $\text{C}_{11}\text{H}_{15}\text{N}^+$  ( $\text{M}+\text{H}$ ) $^+$  180.11830, found 180.11775. The ee was determined to be 93% by converting it to compound **1Bz-i** (see below).

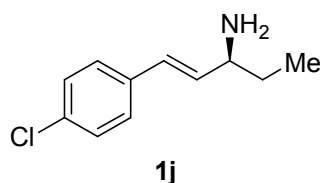

Amine **1j**, light yellow oil;  $[\alpha]_{\text{D}}^{20} = -17.5$  ( $c = 1.08$ ,  $\text{CHCl}_3$ );  $^1\text{H NMR}$  (400 MHz,  $\text{CDCl}_3$ )  $\delta$  7.32-7.23 (m, 4H), 6.43 (d,  $J = 16.0$  Hz, 1H), 6.12 (dd,  $J = 16.0, 7.2$  Hz, 1H), 3.42-3.35 (m, 1H), 1.56-1.50 (m, 2H), 0.94 (t,  $J = 7.2$  Hz, 3H);  $^{13}\text{C NMR}$  (100 MHz,  $\text{CDCl}_3$ )  $\delta$  135.7, 135.3, 132.8, 128.7, 128.0, 127.5, 55.6, 30.7, 10.5; HRMS (ESI) calcd for  $\text{C}_{11}\text{H}_{15}\text{NCl}^+$  ( $\text{M}+\text{H}$ ) $^+$  196.08875, found 196.08872. The ee was determined to be 94% by converting it to compound **1Bz-j** (see below).

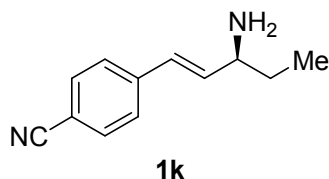

Amine **1k**, light yellow oil;  $[\alpha]_{\text{D}}^{20} = -38.6$  ( $c = 1.09$ ,  $\text{CHCl}_3$ );  $^1\text{H NMR}$  (400 MHz,  $\text{CDCl}_3$ )  $\delta$  7.61-7.56 (m, 2H), 7.46-7.42 (m, 2H), 6.52 (d,  $J = 16.0$  Hz, 1H), 6.29 (dd,  $J = 16.0, 7.2$  Hz, 1H), 3.50-3.42 (m, 1H), 2.02 (s, br, 2H), 1.63-1.51 (m, 2H), 0.95 (t,  $J = 7.2$  Hz, 3H);  $^{13}\text{C NMR}$  (100 MHz,  $\text{CDCl}_3$ )  $\delta$  141.7, 138.2, 132.4, 128.0, 126.8, 119.0, 110.5, 55.4, 30.4, 10.4; HRMS (ESI) calcd for  $\text{C}_{12}\text{H}_{15}\text{N}_2^+$  ( $\text{M}+\text{H}$ ) $^+$  187.12298, found 187.12291. The ee was determined to be 91% by converting it to compound **1Bz-k** (see below).

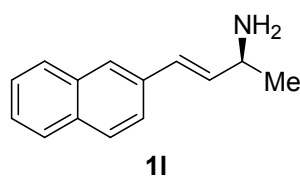

Amine **1l**,<sup>6</sup> colorless oil;  $[\alpha]_{\text{D}}^{20} = -19.8$  ( $c = 1.10$ ,  $\text{CHCl}_3$ );  $^1\text{H NMR}$  (400 MHz,  $\text{CDCl}_3$ )  $\delta$  7.81-7.75 (m, 3H), 7.71 (s, 1H), 7.61-7.57 (m, 1H), 7.47-7.39 (m, 2H), 6.63 (d,  $J = 16.0$  Hz, 1H),



6.34 (dd,  $J = 16.0, 6.8$  Hz, 1H), 3.76-3.69 (m, 1H), 1.29 (d,  $J = 6.4$  Hz, 3H);  $^{13}\text{C}$  NMR (100 MHz,  $\text{CDCl}_3$ )  $\delta$  136.6, 134.6, 133.6, 132.8, 128.2, 128.0, 127.9, 127.6, 126.2, 126.0, 125.7, 123.6, 49.4, 23.9. The ee was determined to be 99% by converting it to compound **1Bz-l** (see below).

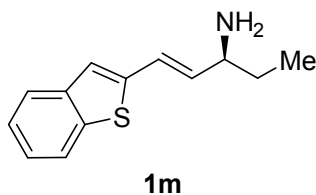

Amine **1m**, yellow oil;  $[\alpha]_{\text{D}}^{20} = -60.5$  ( $c = 1.03$ ,  $\text{CHCl}_3$ );  $^1\text{H}$  NMR (400 MHz,  $\text{CDCl}_3$ )  $\delta$  7.75-7.71 (m, 1H), 7.67-7.63 (m, 1H), 7.32-7.22 (m, 2H), 7.10 (s, 1H), 6.70 (d,  $J = 15.6$  Hz, 1H), 6.08 (dd,  $J = 15.6, 7.2$  Hz, 1H), 3.43-3.36 (m, 1H), 1.60-1.51 (m, 2H), 0.96 (t,  $J = 7.2$  Hz, 3H);  $^{13}\text{C}$  NMR (100 MHz,  $\text{CDCl}_3$ )  $\delta$  142.6, 140.1, 138.7, 137.3, 124.5, 124.3, 123.3, 123.0, 122.2, 55.4, 30.6, 10.5; HRMS (ESI) calcd for  $\text{C}_{13}\text{H}_{15}\text{NSNa}^+$  ( $\text{M}+\text{Na}$ ) $^+$  240.08174, found 240.08110. The ee was determined to be 91% by converting it to compound **1Bz-m** (see below).

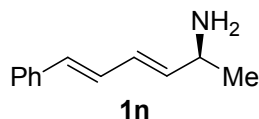

Amine **1n**,<sup>6</sup> yellow oil;  $[\alpha]_{\text{D}}^{20} = -34.5$  ( $c = 1.06$ ,  $\text{CHCl}_3$ );  $^1\text{H}$  NMR (400 MHz,  $\text{CDCl}_3$ )  $\delta$  7.40-7.34 (m, 2H), 7.32-7.27 (m, 2H), 7.23-7.18 (m, 1H), 6.74 (dd,  $J = 15.6, 10.4$ , 1H), 6.50 (d,  $J = 15.6$  Hz, 1H), 6.27 (dd,  $J = 15.2, 10.4$  Hz, 1H), 5.80 (dd,  $J = 15.2, 6.6$  Hz, 1H), 3.63-3.54 (m, 1H), 2.49 (s, br, 2H), 1.21 (d,  $J = 6.8$  Hz, 3H);  $^{13}\text{C}$  NMR (100 MHz,  $\text{CDCl}_3$ )  $\delta$  140.5, 137.4, 131.6, 128.7, 128.6, 128.4, 127.4, 126.2, 49.0, 23.8. The ee was determined to be 80% by converting it to compound **1Bz-n** (see below).

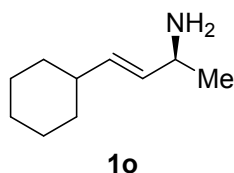

Amine **1o**,<sup>5</sup> yellow oil;  $[\alpha]_{\text{D}}^{20} = -8.4$  ( $c = 1.06$ ,  $\text{CHCl}_3$ ); Lit.<sup>5</sup>:  $[\alpha]_{\text{D}}^{20} = -15.5$  ( $c = 1.1$ ,  $\text{CHCl}_3$ , *S*-enantiomer, 99% ee);  $^1\text{H}$  NMR (400 MHz,  $\text{CDCl}_3$ )  $\delta$  5.45 (dd,  $J = 15.6, 6.4$  Hz, 1H), 5.37 (dd,  $J = 15.6, 6.4$  Hz, 1H), 3.46-3.39 (m, 1H), 1.92-1.84 (m, 1H), 1.75-1.60 (m, 3H), 1.29-0.99 (m, 10H);  $^{13}\text{C}$  NMR (100 MHz,  $\text{CDCl}_3$ )  $\delta$  134.6, 133.9, 49.1, 40.3, 33.1, 26.2, 26.1, 24.2. The ee was determined to be 70% by converting it to compound **1Bz-o** (see below).

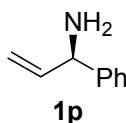

Amine **1p**,<sup>4</sup> yellow oil;  $[\alpha]_{\text{D}}^{20} = 8.6$  ( $c = 1.03$ ,  $\text{CHCl}_3$ ); Lit.<sup>4</sup>:  $[\alpha]_{\text{D}}^{25} = -10.2$  ( $c = 4$ ,  $\text{CHCl}_3$ , *S*-enantiomer, >99.6% ee);  $^1\text{H}$  NMR (400 MHz,  $\text{CDCl}_3$ )  $\delta$  7.36-7.30 (m, 4H), 7.28-7.22 (m, 1H),

6.02 (ddd,  $J = 17.2, 10.4, 6.4$  Hz, 1H), 5.27-5.20 (m, 1H), 5.13-5.09 (m, 1H), 4.54-4.50 (m, 1H);  $^{13}\text{C}$  NMR (100 MHz,  $\text{CDCl}_3$ )  $\delta$  144.4, 142.2, 128.5, 127.1, 126.6, 113.7, 58.4. The ee was determined to be 89% by converting it to compound **1Bz-p** (see below).

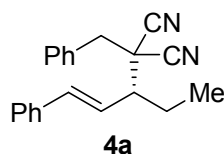

Malononitrile **4a**, light yellow oil;  $[\alpha]_{\text{D}}^{20} = 35.5$  ( $c = 1.02$ ,  $\text{CHCl}_3$ );  $^1\text{H}$  NMR (400 MHz,  $\text{CDCl}_3$ )  $\delta$  7.47-7.43 (m, 2H), 7.42-7.35 (m, 7H), 7.34-7.30 (m, 1H), 6.63 (d,  $J = 15.6$  Hz, 1H), 6.02 (dd,  $J = 15.6, 9.6$  Hz, 1H), 3.27 (d,  $J = 13.6$  Hz, 1H), 3.09 (d,  $J = 13.6$  Hz, 1H), 2.61-2.53 (m, 1H), 2.18-2.08 (m, 1H), 1.82-1.71 (m, 1H), 1.01 (t,  $J = 7.6$  Hz, 3H);  $^{13}\text{C}$  NMR (100 MHz,  $\text{CDCl}_3$ )  $\delta$  137.5, 135.6, 132.4, 130.2, 128.9, 128.8, 128.7, 128.6, 126.7, 123.9, 115.1, 114.4, 52.1, 44.6, 42.1, 24.7, 11.8; HRMS (ESI) calcd for  $\text{C}_{21}\text{H}_{20}\text{N}_2\text{Na}^+$  ( $\text{M}+\text{Na}$ ) $^+$  323.15187, found 323.15183. The ee was determined to be 86% by HPLC analysis (Chiralpak AS,  $\lambda = 254$  nm, hexane/isopropanol = 99:1, flow rate = 1.0 mL/min):  $t_{\text{R}}$  (minor) = 13.3 min,  $t_{\text{R}}$  (major) = 11.6 min.

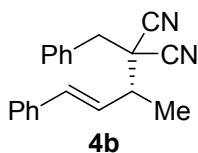

Malononitrile **4b**,<sup>1</sup> white solid; m.p. 112.1-113.0 °C;  $[\alpha]_{\text{D}}^{20} = 24.6$  ( $c = 1.04$ ,  $\text{CHCl}_3$ ); Lit.<sup>1</sup>:  $[\alpha]_{\text{D}}^{25} = -32.3$  ( $c = 1.0$ ,  $\text{CHCl}_3$ , *S*-enantiomer, 95% ee);  $^1\text{H}$  NMR (400 MHz,  $\text{CDCl}_3$ )  $\delta$  7.45-7.28 (m, 10H), 6.65 (d,  $J = 15.6$  Hz, 1H), 6.17 (dd,  $J = 15.6, 9.2$  Hz, 1H), 3.23 (d,  $J = 14.0$  Hz, 1H), 3.10 (d,  $J = 14.0$  Hz, 1H), 2.94-2.85 (m, 1H), 1.54 (d,  $J = 6.8$  Hz, 3H);  $^{13}\text{C}$  NMR (100 MHz,  $\text{CDCl}_3$ )  $\delta$  135.6, 132.4, 130.2, 128.9, 128.8, 128.7, 128.5, 126.7, 125.5, 114.9, 114.3, 45.1, 44.8, 41.7, 17.7. The ee was determined to be 79% by HPLC analysis (Chiralpak AD,  $\lambda = 254$  nm, hexane/isopropanol = 97:3, flow rate = 1.0 mL/min):  $t_{\text{R}}$  (minor) = 15.5 min,  $t_{\text{R}}$  (major) = 14.7 min.

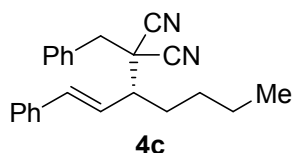

Malononitrile **4c**, light yellow oil;  $[\alpha]_{\text{D}}^{20} = 34.1$  ( $c = 1.03$ ,  $\text{CHCl}_3$ );  $^1\text{H}$  NMR (400 MHz,  $\text{CDCl}_3$ )  $\delta$  7.47-7.43 (m, 2H), 7.42-7.29 (m, 8H), 6.62 (d,  $J = 15.6$  Hz, 1H), 6.04 (dd,  $J = 15.6, 9.6$  Hz, 1H), 3.26 (d,  $J = 14.0$  Hz, 1H), 3.08 (d,  $J = 14.0$  Hz, 1H), 2.70-2.61 (m, 1H), 2.09-1.99 (m, 1H), 1.84-1.69 (m, 1H), 1.47-1.24 (m, 4H), 0.91 (t,  $J = 7.2$  Hz, 3H);  $^{13}\text{C}$  NMR (100 MHz,  $\text{CDCl}_3$ )  $\delta$  137.2, 135.6, 132.4, 130.2, 128.9, 128.8, 128.7, 128.6, 126.7, 124.3, 115.1, 114.4, 50.6, 44.7, 42.1, 31.3, 29.3, 22.3, 13.9; HRMS (ESI) calcd for  $\text{C}_{23}\text{H}_{24}\text{N}_2\text{Na}^+$  ( $\text{M}+\text{Na}$ ) $^+$  351.18317, found 351.18295. The ee was determined to be 94% by HPLC analysis (Chiralpak OD,  $\lambda = 254$  nm, hexane/isopropanol = 80:20, flow rate = 1.0 mL/min):  $t_{\text{R}}$  (minor) = 6.8 min,  $t_{\text{R}}$  (major) = 8.1 min.

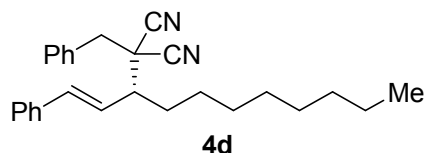

Malononitrile **4d**, light yellow oil;  $[\alpha]_D^{20} = 48.6$  ( $c = 1.08$ ,  $\text{CHCl}_3$ );  $^1\text{H NMR}$  (400 MHz,  $\text{CDCl}_3$ )  $\delta$  7.47-7.43 (m, 2H), 7.41-7.36 (m, 7H), 7.34-7.30 (m, 1H), 6.62 (d,  $J = 15.6$  Hz, 1H), 6.03 (dd,  $J = 15.6, 10.0$  Hz, 1H), 3.26 (d,  $J = 13.6$  Hz, 1H), 3.08 (d,  $J = 13.6$  Hz, 1H), 2.69-2.61 (m, 1H), 2.05-1.98 (m, 1H), 1.81-1.72 (m, 1H), 1.60-1.20 (m, 12H), 0.86 (t,  $J = 6.8$  Hz, 3H);  $^{13}\text{C NMR}$  (100 MHz,  $\text{CDCl}_3$ )  $\delta$  137.2, 135.6, 132.4, 130.2, 128.9, 128.8, 128.7, 128.6, 126.7, 124.3, 115.1, 114.4, 50.6, 44.7, 42.0, 31.8, 31.5, 29.3, 29.2, 27.1, 22.6, 14.1; HRMS (ESI) calcd for  $\text{C}_{27}\text{H}_{32}\text{N}_2\text{Na}^+$  ( $\text{M}+\text{Na}$ ) $^+$  407.24577, found 407.24542. The ee was determined to be 94% by HPLC analysis (Chiralpak OD,  $\lambda = 254$  nm, hexane/isopropanol = 80:20, flow rate = 1.0 mL/min):  $t_R$  (minor) = 6.3 min,  $t_R$  (major) = 8.5 min.

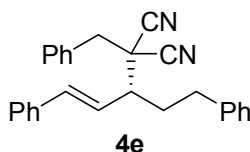

Malononitrile **4e**, light yellow oil;  $[\alpha]_D^{20} = 35.7$  ( $c = 1.06$ ,  $\text{CHCl}_3$ );  $^1\text{H NMR}$  (400 MHz,  $\text{CDCl}_3$ )  $\delta$  7.49-7.45 (m, 2H), 7.42-7.27 (m, 10H), 7.25-7.17 (m, 3H), 6.62 (d,  $J = 15.6$  Hz, 1H), 6.09 (dd,  $J = 15.6, 10.0$  Hz, 1H), 3.22 (d,  $J = 14.0$  Hz, 1H), 3.04 (d,  $J = 14.0$  Hz, 1H), 2.91-2.83 (m, 1H), 2.72-2.55 (m, 2H), 2.46-2.36 (m, 1H), 2.16-2.07 (m, 1H);  $^{13}\text{C NMR}$  (100 MHz,  $\text{CDCl}_3$ )  $\delta$  140.1, 137.9, 135.5, 132.3, 130.2, 128.9, 128.7, 128.6, 128.4, 126.7, 126.4, 123.8, 114.9, 114.3, 49.7, 44.6, 41.9, 32.9, 32.8; HRMS (ESI) calcd for  $\text{C}_{27}\text{H}_{24}\text{N}_2\text{Na}^+$  ( $\text{M}+\text{Na}$ ) $^+$  399.18317, found 399.18292. The ee was determined to be 93% by HPLC analysis (Chiralpak OD,  $\lambda = 254$  nm, hexane/isopropanol = 80:20, flow rate = 1.0 mL/min):  $t_R$  (minor) = 9.7 min,  $t_R$  (major) = 12.1 min.

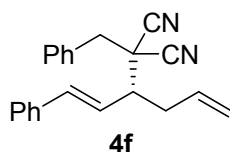

Malononitrile **4f**, white solid; m.p. 68.3-69.1 °C;  $[\alpha]_D^{20} = 48.0$  ( $c = 1.04$ ,  $\text{CHCl}_3$ );  $^1\text{H NMR}$  (400 MHz,  $\text{CDCl}_3$ )  $\delta$  7.46-7.29 (m, 10H), 6.61 (d,  $J = 16.0$  Hz, 1H), 6.06 (dd,  $J = 16.0, 9.6$  Hz, 1H), 5.79-5.68 (m, 1H), 5.21-5.10 (m, 2H), 3.28 (d,  $J = 13.6$  Hz, 1H), 3.10 (d,  $J = 13.6$  Hz, 1H), 2.86-2.72 (m, 2H), 2.60-2.50 (m, 1H);  $^{13}\text{C NMR}$  (100 MHz,  $\text{CDCl}_3$ )  $\delta$  137.6, 135.6, 133.4, 132.3, 130.3, 129.0, 128.9, 128.8, 128.7, 126.8, 123.6, 118.7, 114.9, 114.2, 50.2, 44.2, 42.0, 36.2; HRMS (ESI) calcd for  $\text{C}_{22}\text{H}_{20}\text{N}_2\text{Na}^+$  ( $\text{M}+\text{Na}$ ) $^+$  335.15187, found 335.15189. The ee was determined to be 94% by HPLC analysis (Chiralpak OD,  $\lambda = 254$  nm, hexane/isopropanol = 80:20, flow rate = 1.0 mL/min):  $t_R$  (minor) = 11.5 min,  $t_R$  (major) = 13.8 min.

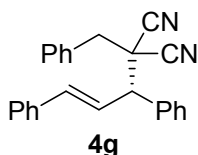

Malononitrile **4g**, white solid; m.p. 153.0-154.0 °C;  $[\alpha]_D^{20} = -16.8$  ( $c = 1.06$ ,  $\text{CHCl}_3$ );  $^1\text{H NMR}$  (400 MHz,  $\text{CDCl}_3$ )  $\delta$  7.54-7.50 (m, 2H), 7.48-7.27 (m, 13H), 6.73 (d,  $J = 15.6$  Hz, 1H), 6.73 (d,  $J = 15.6$  Hz, 1H), 6.66 (dd,  $J = 15.6$ , 8.8 Hz, 1H), 3.90 (d,  $J = 8.8$  Hz, 1H), 3.23 (d,  $J = 13.6$  Hz, 1H), 3.03 (d,  $J = 13.6$  Hz, 1H);  $^{13}\text{C NMR}$  (100 MHz,  $\text{CDCl}_3$ )  $\delta$  136.7, 136.3, 135.6, 132.2, 130.3, 129.3, 129.0, 128.9, 128.8, 128.7, 128.6, 126.8, 123.6, 114.8, 114.4, 55.9, 45.8, 42.5. HRMS (ESI) calcd for  $\text{C}_{25}\text{H}_{20}\text{N}_2\text{Na}^+$  ( $\text{M}+\text{Na}$ ) $^+$  371.15187, found 371.15088. The ee was determined to be 60% by HPLC analysis (Chiralpak OD,  $\lambda = 254$  nm, hexane/isopropanol = 90:10, flow rate = 1.0 mL/min):  $t_R$  (minor) = 15.5 min,  $t_R$  (major) = 13.1 min.

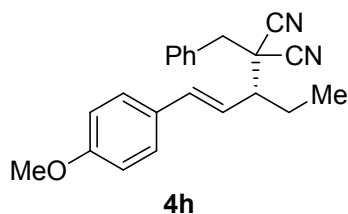

Malononitrile **4h**, light yellow oil;  $[\alpha]_D^{20} = 41.4$  ( $c = 1.04$ ,  $\text{CHCl}_3$ );  $^1\text{H NMR}$  (400 MHz,  $\text{CDCl}_3$ )  $\delta$  7.42-7.36 (m, 7H), 6.93-6.87 (m, 2H), 6.56 (d,  $J = 15.6$  Hz, 1H), 5.87 (dd,  $J = 15.6$ , 10.0 Hz, 1H), 3.83 (s, 3H), 3.27 (d,  $J = 13.6$  Hz, 1H), 3.07 (d,  $J = 13.6$  Hz, 1H), 2.57-2.49 (m, 1H), 2.16-2.05 (m, 1H), 1.80-1.68 (m, 1H), 1.01 (t,  $J = 7.2$  Hz, 3H);  $^{13}\text{C NMR}$  (100 MHz,  $\text{CDCl}_3$ )  $\delta$  159.9, 136.9, 132.5, 130.2, 128.9, 128.6, 128.4, 127.9, 121.5, 115.2, 114.5, 114.2, 55.4, 52.3, 44.7, 42.1, 24.8, 11.8; HRMS (ESI) calcd for  $\text{C}_{22}\text{H}_{22}\text{ON}_2\text{Na}^+$  ( $\text{M}+\text{Na}$ ) $^+$  353.16243, found 353.16232. The ee was determined to be 96% by HPLC analysis (Chiralpak OD,  $\lambda = 254$  nm, hexane/isopropanol = 70:30, flow rate = 1.0 mL/min):  $t_R$  (minor) = 6.7 min,  $t_R$  (major) = 16.4 min.

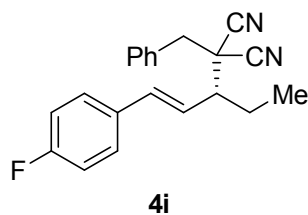

Malononitrile **4i**, light yellow oil;  $[\alpha]_D^{20} = 38.6$  ( $c = 1.06$ ,  $\text{CHCl}_3$ );  $^1\text{H NMR}$  (400 MHz,  $\text{CDCl}_3$ )  $\delta$  7.45-7.36 (m, 7H), 7.09-7.02 (m, 2H), 6.59 (d,  $J = 15.6$  Hz, 1H), 5.94 (dd,  $J = 15.6$ , 10.0 Hz, 1H), 3.25 (d,  $J = 13.6$  Hz, 1H), 3.09 (d,  $J = 13.6$  Hz, 1H), 2.59-2.51 (m, 1H), 2.16-2.08 (m, 1H), 1.80-1.70 (m, 1H), 1.01 (t,  $J = 7.2$  Hz, 3H);  $^{13}\text{C NMR}$  (100 MHz,  $\text{CDCl}_3$ )  $\delta$  162.9 (d,  $^1J_{\text{C-F}} = 246.9$  Hz), 136.3, 132.4, 131.8 (d,  $^4J_{\text{C-F}} = 3.3$  Hz), 130.2, 128.9, 128.7, 128.3 (d,  $^3J_{\text{C-F}} = 8.1$  Hz), 123.7 (d,  $^4J_{\text{C-F}} = 2.2$  Hz), 115.8 (d,  $^2J_{\text{C-F}} = 21.6$  Hz), 115.1, 114.4, 52.1, 44.6, 42.0, 24.7, 11.8; HRMS (ESI) calcd for  $\text{C}_{21}\text{H}_{19}\text{N}_2\text{FNa}^+$  ( $\text{M}+\text{Na}$ ) $^+$  341.14245, found 341.14233. The ee was determined to be 88% by HPLC analysis (Chiralpak OD,  $\lambda = 254$  nm, hexane/isopropanol = 80:20, flow rate = 1.0 mL/min):  $t_R$  (minor) = 6.2 min,  $t_R$  (major) = 10.5 min.

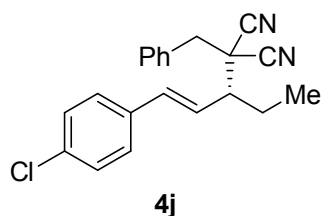

Malononitrile **4j**, light yellow oil;  $[\alpha]_{\text{D}}^{20} = 35.4$  ( $c = 1.06$ ,  $\text{CHCl}_3$ );  $^1\text{H NMR}$  (400 MHz,  $\text{CDCl}_3$ )  $\delta$  7.40-7.32 (m, 9H), 6.58 (d,  $J = 15.6$  Hz, 1H), 6.00 (dd,  $J = 15.6, 10.0$  Hz, 1H), 3.24 (d,  $J = 13.6$  Hz, 1H), 3.09 (d,  $J = 13.6$  Hz, 1H), 2.60-2.50 (m, 1H), 2.17-2.08 (m, 1H), 1.81-1.69 (m, 1H), 1.00 (t,  $J = 7.2$  Hz, 3H);  $^{13}\text{C NMR}$  (100 MHz,  $\text{CDCl}_3$ )  $\delta$  136.3, 134.3, 134.1, 132.3, 130.2, 129.0, 128.9, 128.8, 127.9, 124.6, 115.0, 114.4, 52.1, 44.6, 42.0, 24.6, 11.8; HRMS (ESI) calcd for  $\text{C}_{21}\text{H}_{19}\text{N}_2\text{ClNa}^+$  ( $\text{M}+\text{Na}$ ) $^+$  357.11290, found 357.11270. The ee was determined to be 84% by HPLC analysis (Chiralpak OD,  $\lambda = 254$  nm, hexane/isopropanol = 80:20, flow rate = 1.0 mL/min):  $t_{\text{R}}$  (minor) = 6.7 min,  $t_{\text{R}}$  (major) = 9.9 min.

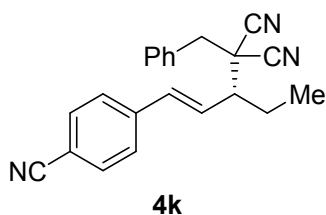

Malononitrile **4k**, light yellow oil;  $[\alpha]_{\text{D}}^{20} = 32.0$  ( $c = 1.07$ ,  $\text{CHCl}_3$ );  $^1\text{H NMR}$  (400 MHz,  $\text{CDCl}_3$ )  $\delta$  7.66 (dd,  $J = 6.8, 1.6$  Hz, 2H), 7.53 (d,  $J = 6.0$  Hz, 2H), 7.42-7.35 (m, 5H), 6.65 (d,  $J = 15.6$  Hz, 1H), 6.17 (dd,  $J = 15.6, 10.0$  Hz, 1H), 3.23 (d,  $J = 13.6$  Hz, 1H), 3.12 (d,  $J = 13.6$  Hz, 1H), 2.64-2.56 (m, 1H), 2.18-2.11 (m, 1H), 1.82-1.73 (m, 1H), 1.02 (t,  $J = 7.2$  Hz, 3H);  $^{13}\text{C NMR}$  (100 MHz,  $\text{CDCl}_3$ )  $\delta$  139.8, 135.8, 132.7, 132.1, 130.2, 129.0, 128.9, 128.1, 127.2, 118.6, 114.7, 114.3, 111.9, 51.9, 44.4, 42.0, 24.4, 11.8; HRMS (ESI) calcd for  $\text{C}_{22}\text{H}_{19}\text{N}_3\text{Na}^+$  ( $\text{M}+\text{Na}$ ) $^+$  348.14712, found 348.14700. The ee was determined to be 90% by HPLC analysis (Chiralpak OD,  $\lambda = 254$  nm, hexane/isopropanol = 70:30, flow rate = 1.0 mL/min):  $t_{\text{R}}$  (minor) = 11.4 min,  $t_{\text{R}}$  (major) = 20.3 min.

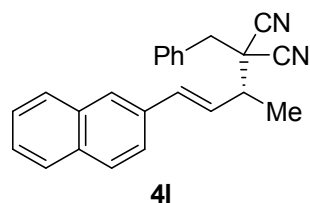

Malononitrile **4l**, light yellow oil;  $[\alpha]_{\text{D}}^{20} = 33.6$  ( $c = 1.08$ ,  $\text{CHCl}_3$ );  $^1\text{H NMR}$  (400 MHz,  $\text{CDCl}_3$ )  $\delta$  7.85-7.78 (m, 4H), 7.65-7.62 (m, 1H), 7.51-7.47 (m, 2H), 7.43-7.35 (m, 5H), 6.81 (d,  $J = 15.6$  Hz, 1H), 6.30 (dd,  $J = 15.6, 8.8$  Hz, 1H), 3.27 (d,  $J = 13.6$  Hz, 1H), 3.14 (d,  $J = 13.6$  Hz, 1H), 2.99-2.92 (m, 1H), 1.59 (d,  $J = 6.8$  Hz, 3H);  $^{13}\text{C NMR}$  (100 MHz,  $\text{CDCl}_3$ )  $\delta$  135.7, 133.4, 133.0, 132.4, 130.2, 128.9, 128.7, 128.5, 128.1, 127.7, 127.0, 126.6, 126.4, 125.8, 123.4, 114.9, 114.3, 45.1, 45.0, 41.8, 17.8; HRMS (ESI) calcd for  $\text{C}_{24}\text{H}_{20}\text{N}_2\text{Na}^+$  ( $\text{M}+\text{Na}$ ) $^+$  359.15187, found 359.15161. The ee was determined to be 73% by HPLC analysis (Chiralpak AD,  $\lambda = 254$  nm, hexane/isopropanol = 95:5, flow rate = 1.0 mL/min):  $t_{\text{R}}$  (minor) = 21.1 min,  $t_{\text{R}}$  (major) = 19.3 min.

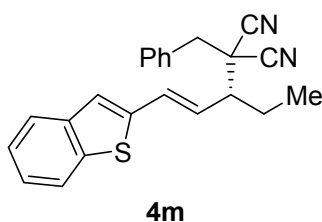

Malononitrile **4m**, white solid; m.p. 161-162 °C;  $[\alpha]_D^{20} = 26.8$  ( $c = 1.05$ ,  $\text{CHCl}_3$ );  $^1\text{H NMR}$  (400 MHz,  $\text{CDCl}_3$ )  $\delta$  7.82-7.75 (m, 1H), 7.74-7.68 (m, 1H), 7.41-7.30 (m, 7H), 7.25-7.23 (m, 1H), 6.85 (d,  $J = 15.6$  Hz, 1H), 5.92 (dd,  $J = 15.6, 10.0$  Hz, 1H), 3.26 (d,  $J = 13.6$  Hz, 1H), 3.10 (d,  $J = 13.6$  Hz, 1H), 2.62-2.51 (m, 1H), 2.17-2.10 (m, 1H), 1.83-1.74 (m, 1H), 1.03 (t,  $J = 7.2$  Hz, 3H);  $^{13}\text{C NMR}$  (100 MHz,  $\text{CDCl}_3$ )  $\delta$  140.4, 139.7, 139.0, 132.3, 131.1, 130.2, 128.9, 128.7, 125.8, 125.3, 124.7, 124.2, 123.8, 122.3, 115.0, 114.2, 52.0, 44.5, 42.0, 24.7, 11.8; HRMS (ESI) calcd for  $\text{C}_{23}\text{H}_{20}\text{N}_2\text{NaS}^+$  ( $\text{M}+\text{Na}$ ) $^+$  379.12394, found 379.12396. The ee was determined to be 95% by HPLC analysis (Chiralpak OD,  $\lambda = 254$  nm, hexane/isopropanol = 80:20, flow rate = 1.0 mL/min):  $t_R$  (minor) = 9.8 min,  $t_R$  (major) = 28.7 min.

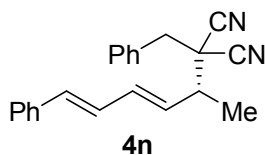

Malononitrile **4n**, light yellow oil;  $[\alpha]_D^{20} = 14.2$  ( $c = 1.06$ ,  $\text{CHCl}_3$ );  $^1\text{H NMR}$  (400 MHz,  $\text{CDCl}_3$ )  $\delta$  7.44-7.31 (m, 9H), 7.28-7.24 (m, 1H), 6.82 (dd,  $J = 15.6, 10.4$  Hz, 1H), 6.62 (d,  $J = 15.6$  Hz, 1H), 6.45 (dd,  $J = 14.8, 10.4$  Hz, 1H), 5.79 (dd,  $J = 14.8, 8.8$  Hz, 1H), 3.21 (d,  $J = 13.7$  Hz, 1H), 3.08 (d,  $J = 13.7$  Hz, 1H), 2.83 (dq,  $J = 13.6, 6.8$  Hz, 1H), 1.50 (d,  $J = 6.8$  Hz, 3H);  $^{13}\text{C NMR}$  (100 MHz,  $\text{CDCl}_3$ )  $\delta$  136.6, 135.8, 134.5, 132.4, 130.2, 129.1, 128.9, 128.7, 128.1, 127.3, 126.6, 114.9, 114.3, 45.1, 44.6, 41.6, 17.6; HRMS (ESI) calcd for  $\text{C}_{22}\text{H}_{20}\text{N}_2\text{Na}^+$  ( $\text{M}+\text{Na}$ ) $^+$  335.15187, found 335.15179. The ee was determined to be 69% by HPLC analysis (Chiralpak OD,  $\lambda = 254$  nm, hexane/isopropanol = 70:30, flow rate = 1.0 mL/min):  $t_R$  (minor) = 11.5 min,  $t_R$  (major) = 22.1 min.

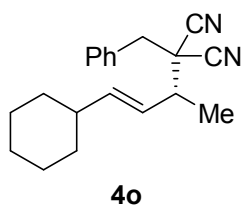

Malononitrile **4o**,<sup>1</sup> light yellow oil;  $[\alpha]_D^{20} = 4.3$  ( $c = 1.04$ ,  $\text{CHCl}_3$ ); Lit.<sup>1</sup>:  $[\alpha]_D^{20} = -9.8$  ( $c = 1.0$ ,  $\text{CHCl}_3$ , *S*-enantiomer, 98% ee);  $^1\text{H NMR}$  (400 MHz,  $\text{CDCl}_3$ )  $\delta$  7.43-7.32 (m, 5H), 5.70 (dd,  $J = 15.6, 7.2$  Hz, 1H), 5.40 (ddd,  $J = 15.6, 8.8, 1.2$  Hz, 1H), 3.16 (d,  $J = 13.6$  Hz, 1H), 3.02 (d,  $J = 13.6$  Hz, 1H), 2.67-2.59 (m, 1H), 2.10-2.00 (m, 1H), 1.79-1.71 (m, 4H), 1.41 (d,  $J = 6.8$  Hz, 3H), 1.35-1.10 (m, 6H);  $^{13}\text{C NMR}$  (100 MHz,  $\text{CDCl}_3$ )  $\delta$  143.2, 132.6, 130.2, 128.8, 128.6, 124.0, 115.0, 114.4, 45.1, 44.2, 41.4, 40.7, 32.8, 32.7, 26.0, 25.8, 17.6. The ee was determined to be 46% by HPLC analysis (Chiralpak AD,  $\lambda = 254$  nm, hexane/isopropanol = 90:10, flow rate = 1.0 mL/min):  $t_R$  (minor) = 14.8 min,  $t_R$  (major) = 16.6 min.

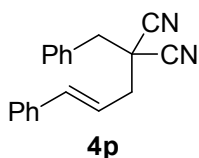

Malononitrile **4p**,<sup>10</sup> light yellow oil; <sup>1</sup>H NMR (400 MHz, CDCl<sub>3</sub>) δ 7.44-7.27 (m, 10H), 6.71 (d, *J* = 15.6 Hz, 1H), 6.27 (dt, *J* = 15.6, 7.6 Hz 1H), 3.25 (s, 2H), 2.88 (dd, *J* = 7.6, 0.8 Hz, 2H); <sup>13</sup>C NMR (100 MHz, CDCl<sub>3</sub>) δ 138.0, 135.7, 131.9, 130.2, 129.0, 128.9, 128.7, 128.5, 126.7, 119.1, 115.0, 42.7, 40.9, 39.6.

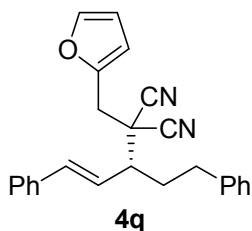

Malononitrile **4q**, light yellow oil; [ $\alpha$ ]<sub>D</sub><sup>20</sup> = 36.8 (*c* = 1.05, CHCl<sub>3</sub>); <sup>1</sup>H NMR (400 MHz, CDCl<sub>3</sub>) δ 7.46-7.43 (m, 2H), 7.40-7.35 (m, 3H), 7.34-7.26 (m, 3H), 7.23-7.15 (m, 3H), 6.62 (d, *J* = 16.0 Hz, 1H), 6.39-6.34 (m, 2H), 6.03 (dd, *J* = 16.0, 10.0 Hz, 1H), 3.33 (d, *J* = 14.8 Hz, 1H), 3.22 (d, *J* = 14.8 Hz, 1H), 2.87-2.79 (m, 1H), 2.66-2.52 (m, 2H), 2.41-2.31 (m, 1H), 2.11-2.01 (m, 1H); <sup>13</sup>C NMR (100 MHz, CDCl<sub>3</sub>) δ 146.3, 143.4, 140.1, 138.2, 135.4, 128.8, 128.7, 128.6, 128.4, 126.7, 126.3, 123.4, 114.6, 114.1, 110.8, 110.6, 48.6, 42.5, 34.6, 32.8, 32.5; HRMS (ESI) calcd for C<sub>25</sub>H<sub>22</sub>ON<sub>2</sub>Na<sup>+</sup> (*M*+Na)<sup>+</sup> 389.16243, found 389.16208. The ee was determined to be 93% by HPLC analysis (Chiralpak OD, λ = 254 nm, hexane/isopropanol = 70:30, flow rate = 1.0 mL/min): t<sub>R</sub> (minor) = 8.7 min, t<sub>R</sub> (major) = 9.6 min.

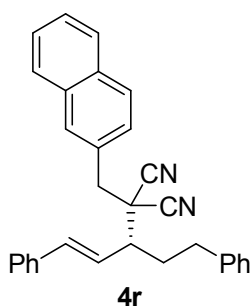

Malononitrile **4r**, light yellow oil; [ $\alpha$ ]<sub>D</sub><sup>20</sup> = 43.0 (*c* = 1.06, CHCl<sub>3</sub>); <sup>1</sup>H NMR (400 MHz, CDCl<sub>3</sub>) δ 7.86-7.81 (m, 4H), 7.52-7.28 (m, 10H), 7.24-7.17 (m, 3H), 6.64 (d, *J* = 16.0 Hz, 1H), 6.13 (dd, *J* = 16.0, 10.0 Hz, 1H), 3.40 (d, *J* = 14.0 Hz, 1H), 3.22 (d, *J* = 14.0 Hz, 1H), 2.92-2.83 (m, 1H), 2.75-2.68 (m, 1H), 2.64-2.55 (m, 1H), 2.47-2.38 (m, 1H), 2.18-2.08 (m, 1H); <sup>13</sup>C NMR (100 MHz, CDCl<sub>3</sub>) δ 140.1, 138.0, 135.5, 133.2, 133.1, 129.8, 129.7, 128.9, 128.8, 128.7, 128.5, 128.0, 127.7, 127.5, 126.8, 126.6, 126.5, 126.4, 123.8, 115.0, 114.3, 49.8, 44.6, 42.1, 32.9, 32.8; HRMS (ESI) calcd for C<sub>31</sub>H<sub>26</sub>N<sub>2</sub>Na<sup>+</sup> (*M*+Na)<sup>+</sup> 449.19882, found 449.19806. The ee was determined to be 99% by HPLC analysis (Chiralpak OD, λ = 254 nm, hexane/isopropanol = 70:30, flow rate = 1.0 mL/min): t<sub>R</sub> (minor) = 23.2 min, t<sub>R</sub> (major) = 33.3 min.

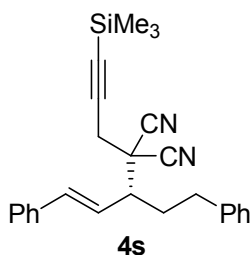

Malononitrile **4s**, light yellow oil;  $[\alpha]_D^{20} = 47.2$  ( $c = 1.04$ ,  $\text{CHCl}_3$ );  $^1\text{H NMR}$  (400 MHz,  $\text{CDCl}_3$ )  $\delta$  7.42-7.11 (m, 10H), 6.59 (d,  $J = 15.6$  Hz, 1H), 5.90 (dd,  $J = 15.6, 10.0$  Hz, 1H), 2.95 (d,  $J = 16.8$  Hz, 1H), 2.88-2.76 (m, 3H), 2.61-2.52 (m, 1H), 2.38-2.29 (m, 1H), 2.10-2.00 (m, 1H), 0.13 (s, 9H);  $^{13}\text{C NMR}$  (100 MHz,  $\text{CDCl}_3$ )  $\delta$  139.9, 138.3, 135.4, 128.9, 128.8, 128.7, 128.4, 126.7, 126.5, 122.7, 114.3, 113.8, 96.0, 92.9, 47.8, 41.5, 32.8, 32.4, 28.5, -0.33; HRMS (ESI) calcd for  $\text{C}_{26}\text{H}_{28}\text{N}_2\text{NaSi}^+$  ( $\text{M}+\text{Na}$ ) $^+$  419.19140, found 419.19070. The ee was determined to be 94% by HPLC analysis (Chiralpak OD,  $\lambda = 254$  nm, hexane/isopropanol = 80:20, flow rate = 1.0 mL/min):  $t_R$  (minor) = 4.8 min,  $t_R$  (major) = 5.7 min.

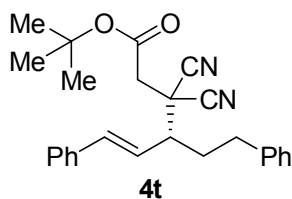

Malononitrile **4t**, light yellow oil;  $[\alpha]_D^{20} = 40.2$  ( $c = 1.05$ ,  $\text{CHCl}_3$ );  $^1\text{H NMR}$  (400 MHz,  $\text{CDCl}_3$ )  $\delta$  7.45-7.15 (m, 10H), 6.55 (d,  $J = 15.6$  Hz, 1H), 5.97 (dd,  $J = 15.6, 10.0$  Hz, 1H), 2.94 (d,  $J = 16.8$  Hz, 1H), 2.88-2.82 (m, 1H), 2.79-2.72 (m, 2H), 2.63-2.57 (m, 1H), 2.43-2.35 (m, 1H), 2.13-2.05 (m, 1H), 1.48 (s, 9H);  $^{13}\text{C NMR}$  (100 MHz,  $\text{CDCl}_3$ )  $\delta$  165.5, 140.0, 138.2, 135.3, 132.1, 128.9, 128.7, 128.5, 126.8, 126.4, 123.2, 114.8, 114.0, 84.0, 49.0, 41.1, 38.6, 32.8, 32.5, 27.9; HRMS (ESI) calcd for  $\text{C}_{26}\text{H}_{28}\text{O}_2\text{N}_2\text{Na}$  ( $\text{M}+\text{Na}$ ) $^+$  423.20430, found 423.20410. The ee was determined to be 87% by HPLC analysis (Chiralpak OD,  $\lambda = 254$  nm, hexane/isopropanol = 80:20, flow rate = 1.0 mL/min):  $t_R$  (minor) = 6.5 min,  $t_R$  (major) = 8.3 min.

### Benzoylation of chiral amines for ee determination

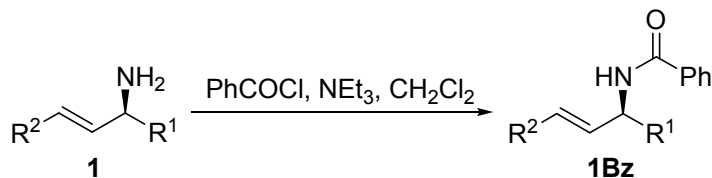

To a solution of chiral amine **1** (0.10 mmol) and triethylamine (0.021 mL, 15.2 mg, 0.15 mmol) in dichloromethane (0.40 mL) at 0 °C was added dropwise a solution of benzoyl chloride (16.9 mg, 0.014 mL, 0.12 mmol) in dichloromethane (0.10 mL). The mixture was allowed to warm to room temperature and stirred overnight. The mixture was quenched with water (0.50 mL) and extracted with dichloromethane (2.5 mL), and the aqueous layer was washed with dichloromethane (1.5 mL). The organic layers were combined, dried over sodium sulfate, and concentrated. The residue was purified by silica gel chromatography, eluting with ethyl acetate/petroleum ether (1:5~1:10), to give



amide **1Bz**.

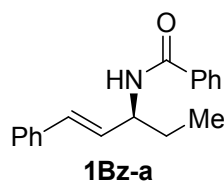

Amide **1Bz-a**,<sup>6</sup> prepared from chiral amine **1a** in 99% yield. White solid; m.p. 125.6-126.8 °C;  $[\alpha]_D^{20} = -31.2$  ( $c = 1.00$ ,  $\text{CHCl}_3$ ); Lit.<sup>6</sup>:  $[\alpha]_D^{20} = 17.2$  ( $c = 1.0$ ,  $\text{CHCl}_3$ , *R*-enantiomer, 68.6% ee); <sup>1</sup>H NMR (400 MHz,  $\text{CDCl}_3$ )  $\delta$  7.84-7.75 (m, 2H), 7.56-7.14 (m, 8H), 6.59 (d,  $J = 16.0$  Hz, 1H), 6.19 (dd,  $J = 16.0$ , 6.4 Hz, 1H), 4.82-4.74 (m, 1H), 1.85-1.63 (m, 2H), 1.02 (t,  $J = 7.2$  Hz, 3H); <sup>13</sup>C NMR (100 MHz,  $\text{CDCl}_3$ )  $\delta$  166.9, 136.7, 134.8, 131.5, 130.9, 129.6, 128.6, 128.5, 127.6, 126.9, 126.4, 52.9, 28.3, 10.4. The ee was determined to be 95% by HPLC analysis (Chiralpak OD,  $\lambda = 254$  nm, hexane/isopropanol = 80:20, flow rate = 1.0 mL/min):  $t_R$  (minor) = 9.6 min,  $t_R$  (major) = 11.6 min.

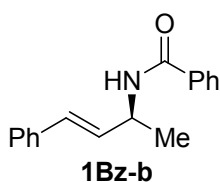

Amide **1Bz-b**,<sup>6</sup> prepared from chiral amine **1b** in 99% yield. White solid; m.p. 118.0-119.0 °C;  $[\alpha]_D^{20} = -26.4$  ( $c = 1.02$ ,  $\text{CHCl}_3$ ); Lit.<sup>6</sup>:  $[\alpha]_D^{20} = 13.2$  ( $c = 1.0$ ,  $\text{CHCl}_3$ , *R*-enantiomer, 68.2% ee); <sup>1</sup>H NMR (400 MHz,  $\text{CDCl}_3$ )  $\delta$  7.81-7.77 (m, 2H), 7.51-7.46 (m, 1H), 7.44-7.39 (m, 2H), 7.37-7.32 (m, 2H), 7.31-7.27 (m, 2H), 7.26-7.20 (m, 1H), 6.57 (d,  $J = 16.0$  Hz, 1H), 6.30-6.22 (m, 2H), 5.01-4.91 (m, 1H), 1.44 (d,  $J = 6.8$  Hz, 3H); <sup>13</sup>C NMR (100 MHz,  $\text{CDCl}_3$ )  $\delta$  166.6, 136.6, 134.6, 131.4, 130.8, 130.0, 128.6, 127.6, 126.9, 126.4, 46.9, 20.7. The ee was determined to be 97% by HPLC analysis (Chiralpak OD,  $\lambda = 254$  nm, hexane/isopropanol = 70:30, flow rate = 1.0 mL/min):  $t_R$  (minor) = 6.4 min,  $t_R$  (major) = 10.6 min.

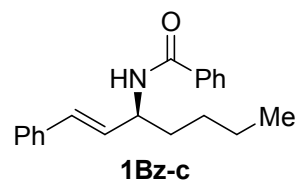

Amide **1Bz-c**, prepared from chiral amine **1c** in 99% yield. White solid; m.p. 117.8-118.6 °C;  $[\alpha]_D^{20} = -33.6$  ( $c = 1.04$ ,  $\text{CHCl}_3$ ); <sup>1</sup>H NMR (400 MHz,  $\text{CDCl}_3$ )  $\delta$  7.85-7.76 (m, 2H), 7.50-7.15 (m, 8H), 6.56 (d,  $J = 16.0$  Hz, 1H), 6.43 (d,  $J = 6.0$  Hz, 1H), 6.18 (dd,  $J = 16.0$ , 5.6 Hz, 1H), 4.88-4.76 (m, 1H), 1.76-1.65 (m, 2H), 1.46-1.25 (m, 4H), 0.94-0.86 (m, 3H); <sup>13</sup>C NMR (100 MHz,  $\text{CDCl}_3$ )  $\delta$  166.8, 136.7, 134.7, 131.4, 130.6, 130.0, 128.5, 127.5, 127.0, 126.4, 51.6, 35.0, 28.1, 22.5, 14.0; HRMS (ESI) calcd for  $\text{C}_{20}\text{H}_{23}\text{ONa}^+$  ( $\text{M}+\text{Na}$ )<sup>+</sup> 316.16719, found 316.16718. The ee was determined to be 90% by HPLC analysis (Chiralpak OD,  $\lambda = 254$  nm, hexane/isopropanol = 90:10, flow rate = 1.0 mL/min):  $t_R$  (minor) = 20.9 min,  $t_R$  (major) = 17.3 min.

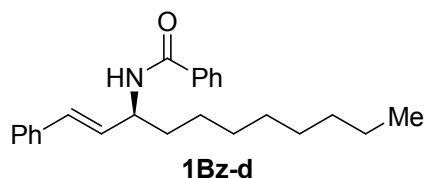

Amide **1Bz-d**, prepared from chiral amine **1d** in 99% yield. White solid; m.p. 99.8-101.0 °C;  $[\alpha]_D^{20} = -42.3$  ( $c = 1.02$ ,  $\text{CHCl}_3$ );  $^1\text{H NMR}$  (400 MHz,  $\text{CDCl}_3$ )  $\delta$  7.80 (d,  $J = 7.2$  Hz, 2H), 7.52-7.41 (m, 3H), 7.38-7.20 (m, 5H), 6.59 (d,  $J = 16.0$  Hz, 1H), 6.23-6.13 (m, 2H), 4.88-4.78 (m, 1H), 1.78-1.67 (m, 2H), 1.49-1.25 (m, 12H), 0.87 (t,  $J = 6.8$  Hz, 3H);  $^{13}\text{C NMR}$  (100 MHz,  $\text{CDCl}_3$ )  $\delta$  166.7, 136.7, 134.8, 131.4, 130.7, 129.9, 128.6, 128.5, 127.6, 126.9, 126.4, 51.5, 35.4, 31.8, 29.5, 29.2, 26.0, 22.7, 14.1; HRMS (ESI) calcd for  $\text{C}_{24}\text{H}_{31}\text{ONNa}^+$  ( $\text{M}+\text{Na}$ ) $^+$  372.22979, found 372.22974. The ee was determined to be 96% by HPLC analysis (Chiralpak OD,  $\lambda = 254$  nm, hexane/isopropanol = 80:20, flow rate = 1.0 mL/min):  $t_R$  (minor) = 17.8 min,  $t_R$  (major) = 13.5 min.

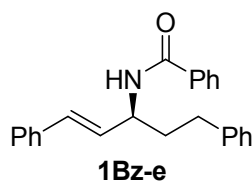

Amide **1Bz-e**,<sup>11</sup> prepared from chiral amine **1e** in 99% yield. White solid; m.p. 163-164 °C;  $[\alpha]_D^{20} = -15.6$  ( $c = 1.01$ ,  $\text{CHCl}_3$ ); Lit.<sup>11</sup>:  $[\alpha]_D^{20} = -8.4$  ( $c = 1.0$ ,  $\text{CHCl}_3$ , *S*-enantiomer, 52% ee);  $^1\text{H NMR}$  (400 MHz,  $\text{CDCl}_3$ )  $\delta$  7.73-7.69 (m, 2H), 7.53-7.48 (m, 1H), 7.46-7.40 (m, 2H), 7.39-7.35 (m, 2H), 7.33-7.17 (m, 8H), 6.61 (d,  $J = 16.0$  Hz, 1H), 6.23 (dd,  $J = 16.0$ , 6.4 Hz, 1H), 6.08 (d,  $J = 8.0$  Hz, 1H), 4.98-4.87 (m, 1H), 2.82-2.77 (m, 2H), 2.14-2.08 (m, 2H);  $^{13}\text{C NMR}$  (100 MHz,  $\text{CDCl}_3$ )  $\delta$  166.7, 141.5, 139.7, 136.6, 136.0, 134.5, 131.5, 131.2, 129.4, 128.6, 128.4, 127.7, 126.9, 126.5, 126.1, 51.4, 36.8, 32.3. The ee was determined to be 94% by HPLC analysis (Chiralpak OD,  $\lambda = 254$  nm, hexane/isopropanol = 80:20, flow rate = 1.0 mL/min):  $t_R$  (minor) = 19.8 min,  $t_R$  (major) = 24.4 min.

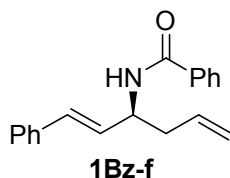

Amide **1Bz-f**,<sup>11</sup> prepared from chiral amine **1f** in 99% yield. White solid; m.p. 99.0-100.1 °C;  $[\alpha]_D^{20} = -20.2$  ( $c = 1.05$ ,  $\text{CHCl}_3$ ); Lit.<sup>11</sup>:  $[\alpha]_D^{20} = -23.6$  ( $c = 1.0$ ,  $\text{CHCl}_3$ , *S*-enantiomer, 76% ee);  $^1\text{H NMR}$  (400 MHz,  $\text{CDCl}_3$ )  $\delta$  7.79 (d,  $J = 7.2$  Hz, 2H), 7.51-7.46 (m, 1H), 7.44-7.38 (m, 2H), 7.36-7.19 (m, 5H), 6.56 (d,  $J = 16.0$  Hz, 1H), 6.40 (d,  $J = 7.2$  Hz, 1H), 6.22 (dd,  $J = 16.0$ , 6.0 Hz, 1H), 5.94-5.78 (m, 1H), 5.21-5.12 (m, 2H), 5.00-4.89 (m, 1H), 2.55-2.50 (m, 2H);  $^{13}\text{C NMR}$  (100 MHz,  $\text{CDCl}_3$ )  $\delta$  166.7, 136.6, 134.6, 133.9, 131.5, 130.7, 129.1, 128.6, 128.5, 127.6, 126.9, 126.4, 118.6, 50.4, 39.5. The ee was determined to be 60% by HPLC analysis (Chiralpak OD,  $\lambda = 254$  nm, hexane/isopropanol = 90:10, flow rate = 1.0 mL/min):  $t_R$  (minor) = 19.9 min,  $t_R$  (major) = 24.2 min.

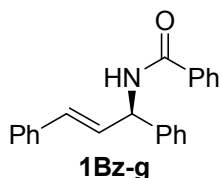

Amide **1Bz-g**,<sup>12</sup> prepared from chiral amine **1g** in 99% yield. White solid; m.p. 163.1-164.2 °C;  $[\alpha]_D^{20} = 12.4$  ( $c = 1.05$ ,  $\text{CHCl}_3$ ); Lit.<sup>12</sup>:  $[\alpha]_D^{23} = 20.4$  ( $c = 1.0$ ,  $\text{CHCl}_3$ , *R*-enantiomer, 95% ee); <sup>1</sup>H NMR (400 MHz,  $\text{CDCl}_3$ )  $\delta$  7.84-7.80 (m, 2H), 7.53-7.47 (m, 1H), 7.46-7.35 (m, 8H), 7.34-7.26 (m, 3H), 7.25-7.20 (m, 1H), 6.66-6.61 (m, 2H), 6.43 (dd,  $J = 16.0, 6.0$  Hz, 1H), 6.05-5.99 (m, 1H); <sup>13</sup>C NMR (100 MHz,  $\text{CDCl}_3$ )  $\delta$  166.5, 140.8, 136.4, 134.3, 131.7, 128.9, 128.7, 128.6, 127.8, 127.2, 127.0, 126.6, 55.2. The ee was determined to be 70% by HPLC analysis (Chiralpak AS,  $\lambda = 254$  nm, hexane/isopropanol = 80:20, flow rate = 1.0 mL/min):  $t_R$  (minor) = 23.9 min,  $t_R$  (major) = 10.3 min.

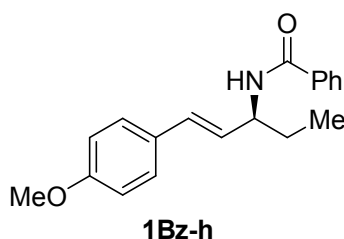

Amide **1Bz-h**, prepared from chiral amine **1h** in 99% yield. White solid; m.p. 131.2-132.1 °C;  $[\alpha]_D^{20} = -33.2$  ( $c = 1.08$ ,  $\text{CHCl}_3$ ); <sup>1</sup>H NMR (400 MHz,  $\text{CDCl}_3$ )  $\delta$  7.82-7.78 (m, 2H), 7.52-7.46 (m, 1H), 7.45-7.39 (m, 2H), 7.29 (d,  $J = 8.8$  Hz, 2H), 6.83 (d,  $J = 8.8$  Hz, 2H), 6.53 (d,  $J = 16.0$  Hz, 1H), 6.10-6.02 (m, 2H), 4.78-4.69 (m, 1H), 3.80 (s, 3H), 1.80-1.70 (m, 2H), 1.01 (t,  $J = 7.2$  Hz, 3H); <sup>13</sup>C NMR (100 MHz,  $\text{CDCl}_3$ )  $\delta$  166.8, 159.2, 134.8, 131.4, 130.4, 129.4, 128.5, 127.5, 127.3, 126.9, 113.9, 55.3, 52.9, 28.3, 10.4; HRMS (ESI) calcd for  $\text{C}_{19}\text{H}_{21}\text{O}_2\text{NNa}^+$  ( $\text{M}+\text{Na}$ )<sup>+</sup> 318.14645, found 318.14645. The ee was determined to be 85% by HPLC analysis (Chiralpak OD,  $\lambda = 254$  nm, hexane/isopropanol = 80:20, flow rate = 1.0 mL/min):  $t_R$  (minor) = 13.2 min,  $t_R$  (major) = 9.0 min.

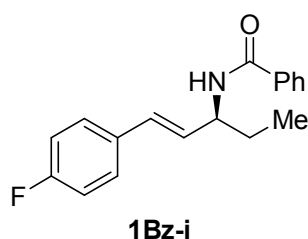

Amide **1Bz-i**, prepared from chiral amine **1i** in 99% yield. Colorless oil;  $[\alpha]_D^{20} = -45.1$  ( $c = 1.00$ ,  $\text{CHCl}_3$ ); <sup>1</sup>H NMR (400 MHz,  $\text{CDCl}_3$ )  $\delta$  7.82-7.79 (m, 2H), 7.54-7.42 (m, 3H), 7.35-7.30 (m, 2H), 7.01-6.96 (m, 2H), 6.56 (d,  $J = 16.0$  Hz, 1H), 6.17-6.07 (m, 2H), 4.80-4.71 (m, 1H), 1.81-1.72 (m, 2H), 1.03 (t,  $J = 7.2$  Hz, 3H); <sup>13</sup>C NMR (100 MHz,  $\text{CDCl}_3$ )  $\delta$  166.9, 162.3 (d,  $^1J_{\text{C-F}} = 245.4$  Hz), 134.7, 133.5, 132.9 (d,  $^4J_{\text{C-F}} = 3.1$  Hz), 131.6, 129.8, 128.6, 127.9 (d,  $^3J_{\text{C-F}} = 7.8$  Hz), 126.9, 115.5 ( $^2J_{\text{C-F}}$ ,  $J = 21.6$  Hz), 52.9, 28.3, 10.4; HRMS (ESI) calcd for  $\text{C}_{18}\text{H}_{18}\text{ONFNa}^+$  ( $\text{M}+\text{Na}$ )<sup>+</sup> 306.12646, found 306.12646. The ee was determined to be 93% by HPLC analysis (Chiralpak OD,  $\lambda = 254$  nm, hexane/isopropanol = 80:20, flow rate = 1.0 mL/min):  $t_R$  (minor) = 7.9 min,  $t_R$  (major) = 6.4 min.

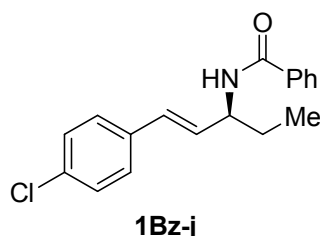

Amide **1Bz-j**, prepared from chiral amine **1j** in 99% yield. White solid; m.p. 129.6-130.1 °C;  $[\alpha]_D^{20} = -12.8$  ( $c = 1.05$ ,  $\text{CHCl}_3$ );  $^1\text{H NMR}$  (400 MHz,  $\text{CDCl}_3$ )  $\delta$  7.81 (d,  $J = 8.0$  Hz, 2H), 7.50-7.45 (m, 1H), 7.42-7.36 (m, 2H), 7.24-7.20 (m, 4H), 6.54 (s, br, 1H), 6.49 (d,  $J = 16.0$  Hz, 1H), 6.13 (dd,  $J = 16.0, 6.4$  Hz, 1H), 4.78-4.66 (m, 1H), 1.80-1.68 (m, 2H), 0.99 (t,  $J = 7.2$  Hz, 3H);  $^{13}\text{C NMR}$  (100 MHz,  $\text{CDCl}_3$ )  $\delta$  166.9, 135.2, 134.6, 133.1, 131.4, 130.4, 129.5, 128.6, 128.5, 127.5, 126.9, 52.9, 28.1, 10.4; HRMS (ESI) calcd for  $\text{C}_{18}\text{H}_{18}\text{ONCINa}^+$  ( $\text{M}+\text{Na}$ ) $^+$  322.09691, found 322.09692. The ee was determined to be 94% by HPLC analysis (Chiralpak OD,  $\lambda = 254$  nm, hexane/isopropanol = 80:20, flow rate = 1.0 mL/min):  $t_R$  (minor) = 9.3 min,  $t_R$  (major) = 6.7 min.

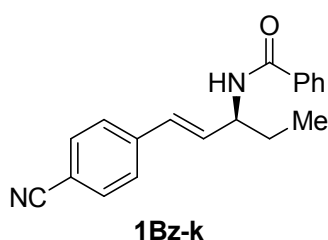

Amide **1Bz-k**, prepared from chiral amine **1k** in 99% yield. White solid; m.p. 86.1-87.3 °C;  $[\alpha]_D^{20} = -41.6$  ( $c = 1.05$ ,  $\text{CHCl}_3$ );  $^1\text{H NMR}$  (400 MHz,  $\text{CDCl}_3$ )  $\delta$  7.84-7.80 (m, 2H), 7.57 (d,  $J = 8.4$  Hz, 2H), 7.54-7.49 (m, 1H), 7.47-7.40 (m, 4H), 6.59 (d,  $J = 16.0$  Hz, 1H), 6.32 (dd,  $J = 16.0, 6.4$  Hz, 1H), 6.27 (s, br, 1H), 4.82-4.74 (m, 1H), 1.84-1.73 (m, 2H), 1.04 (t,  $J = 7.2$  Hz, 3H);  $^{13}\text{C NMR}$  (100 MHz,  $\text{CDCl}_3$ )  $\delta$  167.0, 141.3, 134.4, 133.9, 132.4, 131.7, 129.2, 128.7, 127.0, 126.9, 118.9, 110.7, 52.9, 28.1, 10.5; HRMS (ESI) calcd for  $\text{C}_{19}\text{H}_{18}\text{ON}_2\text{Na}^+$  ( $\text{M}+\text{Na}$ ) $^+$  313.13113, found 313.13119. The ee was determined to be 91% by HPLC analysis (Chiralpak OD,  $\lambda = 254$  nm, hexane/isopropanol = 80:20, flow rate = 1.0 mL/min):  $t_R$  (minor) = 24.9 min,  $t_R$  (major) = 12.0 min.

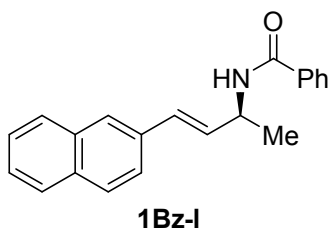

Amide **1Bz-l**,<sup>6</sup> prepared from chiral amine **1l** in 98% yield. White solid; m.p. 126.0-127.3 °C;  $[\alpha]_D^{20} = -21.5$  ( $c = 1.03$ ,  $\text{CHCl}_3$ ); Lit.<sup>6</sup>:  $[\alpha]_D^{20} = 12.7$  ( $c = 1.0$ ,  $\text{CHCl}_3$ , *R*-enantiomer, 62.4% ee);  $^1\text{H NMR}$  (400 MHz,  $\text{CDCl}_3$ )  $\delta$  7.84-7.74 (m, 5H), 7.72-7.70 (m, 1H), 7.58-7.55 (m, 1H), 7.52-7.40 (m, 5H), 6.73 (d,  $J = 16.0$  Hz, 1H), 6.39 (dd,  $J = 16.0, 5.6$  Hz, 1H), 6.28 (d,  $J = 8.0$  Hz, 1H), 5.08-4.97 (m, 1H), 1.48 (d,  $J = 6.8$  Hz, 3H);  $^{13}\text{C NMR}$  (100 MHz,  $\text{CDCl}_3$ )  $\delta$  166.7, 134.6, 134.1, 133.5, 133.0, 131.5, 131.2, 130.1, 128.6, 128.2, 128.0, 127.6, 127.0, 126.4, 126.3, 125.9, 123.5, 47.0, 20.7. The ee was determined to be 99% by HPLC analysis (Chiralpak OD,  $\lambda = 254$  nm, hexane/isopropanol = 80:20, flow rate = 1.0 mL/min):  $t_R$  (minor) = 19.0 min,  $t_R$  (major) = 16.9 min.

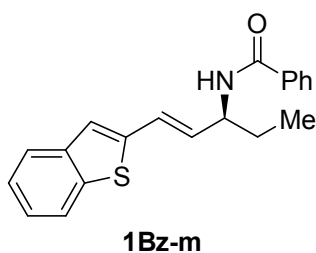

Amide **1Bz-m**, prepared from chiral amine **1m** in 99% yield. White solid; m.p. 116.0-117.0 °C;  $[\alpha]_D^{20} = -21.6$  ( $c = 1.00$ ,  $\text{CHCl}_3$ );  $^1\text{H NMR}$  (400 MHz,  $\text{CDCl}_3$ )  $\delta$  7.82 (d,  $J = 7.2$  Hz, 2H), 7.75-7.72 (m, 1H), 7.68-7.64 (m, 1H), 7.54-7.49 (m, 1H), 7.48-7.42 (m, 2H), 7.33-7.26 (m, 2H), 7.12 (s, 1H), 6.82 (d,  $J = 15.6$  Hz, 1H), 6.16 (d,  $J = 8.0$  Hz, 1H), 6.10 (dd,  $J = 15.6, 6.4$  Hz, 1H), 4.84-4.75 (m, 1H), 1.84-1.73 (m, 2H), 1.04 (t,  $J = 7.2$  Hz, 3H);  $^{13}\text{C NMR}$  (100 MHz,  $\text{CDCl}_3$ )  $\delta$  166.9, 141.8, 140.0, 138.8, 134.6, 131.9, 131.6, 128.6, 126.9, 124.9, 124.7, 124.4, 123.5, 123.1, 122.2, 52.6, 28.2, 10.4; HRMS (ESI) calcd for  $\text{C}_{20}\text{H}_{19}\text{ONNaS}^+$  ( $\text{M}+\text{Na}$ ) $^+$  344.10796, found 344.10797. The ee was determined to be 91% by HPLC analysis (Chiralpak OD,  $\lambda = 254$  nm, hexane/isopropanol = 80:20, flow rate = 1.0 mL/min):  $t_R$  (minor) = 12.7 min,  $t_R$  (major) = 8.8 min.

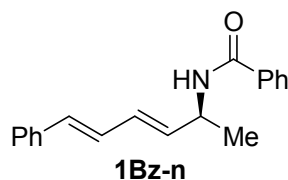

Amide **1Bz-n**,<sup>6</sup> prepared from chiral amine **1n** in 99% yield. White solid; m.p. 143.1-143.8.0 °C;  $[\alpha]_D^{20} = -21.4$  ( $c = 1.05$ ,  $\text{CHCl}_3$ ); Lit.<sup>6</sup>:  $[\alpha]_D^{20} = 16.5$  ( $c = 1.0$ ,  $\text{CHCl}_3$ , *R*-enantiomer, 65.8% ee);  $^1\text{H NMR}$  (400 MHz,  $\text{CDCl}_3$ )  $\delta$  7.83-7.77 (m, 2H), 7.53-7.47 (m, 1H), 7.46-7.41 (m, 2H), 7.39-7.36 (m, 2H), 7.33-7.28 (m, 2H), 7.24-7.19 (m, 1H), 6.75 (dd,  $J = 15.6, 10.4$  Hz, 1H), 6.54 (d,  $J = 15.6$  Hz, 1H), 6.39 (dd,  $J = 15.2, 10.4$  Hz, 1H), 6.17 (d,  $J = 8.0$  Hz, 1H), 5.87 (dd,  $J = 15.2, 5.6$  Hz, 1H), 4.95-4.85 (m, 1H), 1.40 (d,  $J = 7.2$  Hz, 3H);  $^{13}\text{C NMR}$  (100 MHz,  $\text{CDCl}_3$ )  $\delta$  166.6, 137.1, 134.9, 134.6, 132.8, 131.5, 130.4, 128.6, 128.1, 127.6, 126.9, 126.4, 46.7, 20.6. The ee was determined to be 80% by HPLC analysis (Chiralpak OD,  $\lambda = 280$  nm, hexane/isopropanol = 80:20, flow rate = 1.0 mL/min):  $t_R$  (minor) = 20.5 min,  $t_R$  (major) = 16.9 min.

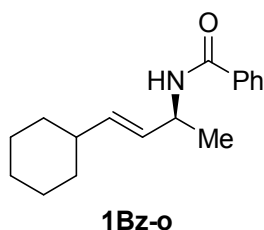

Amide **1Bz-o**,<sup>5</sup> prepared from chiral amine **1o** in 99% yield. White solid; m.p. 76.5-77.1 °C;  $[\alpha]_D^{20} = -10.8$  ( $c = 1.04$ ,  $\text{CHCl}_3$ ); Lit.<sup>5</sup>:  $[\alpha]_D^{20} = -21.1$  ( $c = 0.52$ ,  $\text{CHCl}_3$ , *S*-enantiomer, 99% ee);  $^1\text{H NMR}$  (400 MHz,  $\text{CDCl}_3$ )  $\delta$  7.79-7.75 (m, 2H), 7.51-7.46 (m, 1H), 7.45-7.39 (m, 2H), 6.01 (d,  $J = 7.2$  Hz, 1H), 5.61 (ddd,  $J = 15.6, 6.4, 1.2$  Hz, 1H), 5.47 (ddd,  $J = 15.6, 6.4, 1.2$  Hz, 1H), 4.79-4.67 (m, 1H), 1.98-1.90 (m, 1H), 1.76-1.60 (m, 4H), 1.31 (d,  $J = 8.4$  Hz, 3H), 1.30-0.99 (m, 6H);  $^{13}\text{C NMR}$

(100 MHz, CDCl<sub>3</sub>)  $\delta$  166.5, 137.0, 134.9, 131.3, 128.5, 126.9, 46.7, 40.3, 32.9, 32.8, 26.1, 26.0, 20.9. The ee was determined to be 70% by HPLC analysis (Chiralpak AD,  $\lambda$  = 254 nm, hexane/isopropanol = 90:10, flow rate = 1.0 mL/min):  $t_R$  (minor) = 6.7 min,  $t_R$  (major) = 8.3 min.

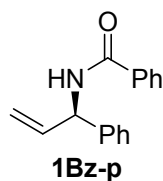

Amide **1Bz-p**,<sup>13</sup> prepared from chiral amine **1p** in 99% yield. White solid; m.p. 97.0-98.1 °C;  $[\alpha]_D^{20}$  = 25.4 ( $c$  = 1.08, CHCl<sub>3</sub>); Lit.<sup>13</sup>:  $[\alpha]_D^{22}$  = -52.4 ( $c$  = 1, CHCl<sub>3</sub>, *S*-enantiomer, 90% ee); <sup>1</sup>H NMR (400 MHz, CDCl<sub>3</sub>)  $\delta$  7.82-7.77 (m, 2H), 7.53-7.47 (m, 1H), 7.45-7.27 (m, 7H), 6.43 (d,  $J$  = 7.2 Hz, 1H), 6.11 (ddd,  $J$  = 17.2, 10.0, 5.2 Hz, 1H), 5.88-5.83 (m, 1H), 5.33-5.27 (m, 2H); <sup>13</sup>C NMR (100 MHz, CDCl<sub>3</sub>)  $\delta$  166.5, 140.5, 137.1, 134.3, 131.6, 128.8, 128.6, 127.8, 127.3, 127.0, 116.2, 55.5. The ee was determined to be 89% by HPLC analysis (Chiralpak AD,  $\lambda$  = 220 nm, hexane/isopropanol = 90:10, flow rate = 1.0 mL/min):  $t_R$  (minor) = 22.1 min,  $t_R$  (major) = 13.5 min.

#### Enantiospecific allylic alkylation (Scheme 4)

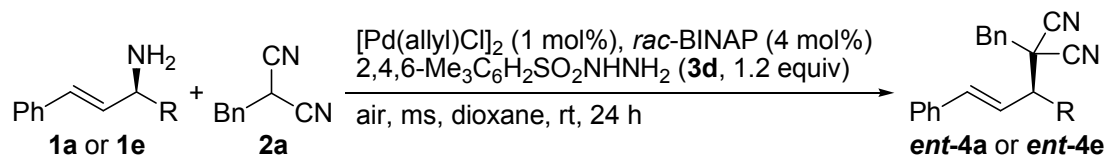

The reaction was performed following the general procedure shown above but using racemic BINAP instead of (*S*)-BINAP.

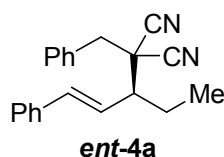

Malononitrile **ent-4a**, light yellow oil; 95% ee as determined by HPLC analysis (Chiralpak AD,  $\lambda$  = 254 nm, hexane/isopropanol = 99:1, flow rate = 1.0 mL/min):  $t_R$  (minor) = 11.1 min,  $t_R$  (major) = 12.6 min;  $[\alpha]_D^{20}$  = -41.2 ( $c$  = 1.00, CHCl<sub>3</sub>).

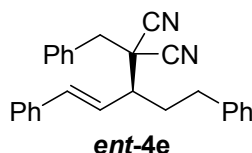

Malononitrile **ent-4e**, light yellow oil; 94% ee as determined by HPLC analysis Chiralpak OD,  $\lambda$  = 254 nm, hexane/isopropanol = 80:20, flow rate = 1.0 mL/min):  $t_R$  (minor) = 12.7 min,  $t_R$  (major) = 10.0 min;  $[\alpha]_D^{20}$  = -36.4 ( $c$  = 1.04, CHCl<sub>3</sub>).

#### Kinetic resolution of secondary and tertiary allylic amines (Scheme 5)

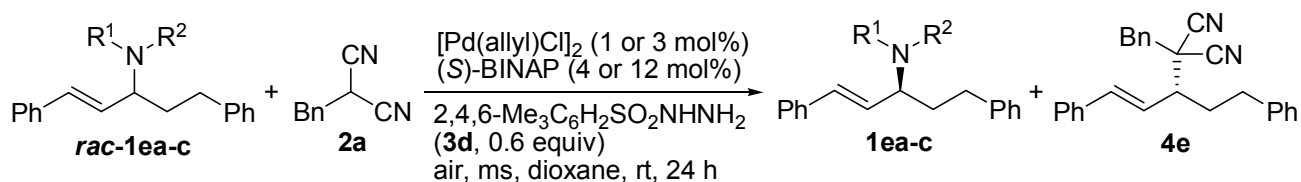

The reaction was performed following the general procedure shown above. Analytical data for the products are shown below.

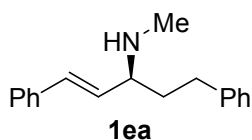

Amine **1ea**, light yellow oil;  $[\alpha]_{\text{D}}^{20} = -42.8$  ( $c = 1.04$ ,  $\text{CHCl}_3$ );  $^1\text{H NMR}$  (400 MHz,  $\text{CDCl}_3$ )  $\delta$  7.40 (d,  $J = 7.6$  Hz, 2H), 7.35-7.25 (m, 5H), 7.20-7.16 (m, 3H), 6.50 (d,  $J = 16.0$  Hz, 1H), 6.03 (dd,  $J = 16.0, 8.4$  Hz, 1H), 3.16-3.08 (m, 1H), 2.75-2.62 (m, 2H), 2.41 (s, 3H), 2.01-1.93 (m, 1H), 1.90-1.82 (m, 1H);  $^{13}\text{C NMR}$  (100 MHz,  $\text{CDCl}_3$ )  $\delta$  141.9, 136.8, 132.6, 131.3, 128.6, 128.4, 127.6, 126.4, 125.9, 62.7, 37.0, 33.7, 32.2; HRMS (ESI) calcd for  $\text{C}_{18}\text{H}_{22}\text{N}^+$  ( $\text{M}+\text{H}$ ) $^+$  252.17468, found 252.17435. The ee was determined to be 91% by converting it to compound **1Bz-ea** (see below).

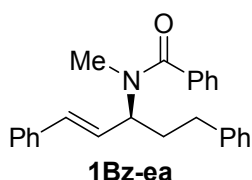

Amide **1Bz-ea** was prepared from chiral amine **1ea** in 99% yield according to the above procedure (Benzoylation of chiral amines for ee determination). Yellowish oil;  $[\alpha]_{\text{D}}^{20} = -24.5$  ( $c = 1.02$ ,  $\text{CHCl}_3$ );  $^1\text{H NMR}$  (400 MHz,  $\text{CDCl}_3$ , mixture of rotamers)  $\delta$  7.48-7.09 (m, 15H), 6.65-6.40 (m, 1H), 6.30-6.10 (m, 1H), 4.50-4.40 (m, 1H), 3.05 (s, 3H), 2.65-2.45 (m, 1H), 2.15-1.95 (m, 2H), 1.75-1.60 (m, 1H);  $^{13}\text{C NMR}$  (100 MHz,  $\text{CDCl}_3$ , mixture of rotamers)  $\delta$  172.7, 171.8, 140.7, 136.6, 136.3, 132.6, 131.7, 129.5, 128.7, 128.5, 128.2, 128.0, 127.5, 126.9, 126.5, 126.4, 126.2, 100.0, 59.8, 54.4, 34.2, 32.9, 32.4, 27.7; HRMS (ESI) calcd for  $\text{C}_{25}\text{H}_{26}\text{NO}^+$  ( $\text{M}+\text{H}$ ) $^+$  356.20089, found 356.20012. The ee was determined to be 91% by HPLC analysis (Chiralpak OD,  $\lambda = 254$  nm, hexane/isopropanol = 90:10, flow rate = 1.0 mL/min):  $t_{\text{R}}$  (minor) = 12.1 min,  $t_{\text{R}}$  (major) = 15.4 min.

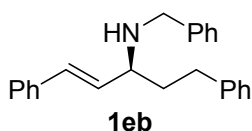

Amine **1eb**, light yellow oil;  $[\alpha]_{\text{D}}^{20} = -28.6$  ( $c = 1.03$ ,  $\text{CHCl}_3$ );  $^1\text{H NMR}$  (400 MHz,  $\text{CDCl}_3$ )  $\delta$  7.42-7.39 (m, 2H), 7.36-7.29 (m, 6H), 7.27-7.23 (m, 4H), 7.19-7.14 (m, 3H), 6.49 (d,  $J = 16.0$  Hz, 1H), 6.08 (dd,  $J = 16.0, 8.4$  Hz, 1H), 3.86 (d,  $J = 13.2$  Hz, 1H), 3.69 (d,  $J = 13.2$  Hz, 1H), 3.29-3.22 (m, 1H), 2.75-2.61 (m, 2H), 1.99-1.83 (m, 2H);  $^{13}\text{C NMR}$  (100 MHz,  $\text{CDCl}_3$ )  $\delta$  142.0, 140.2, 137.0, 132.4, 132.0, 128.6, 128.4, 128.3, 127.5, 127.0, 126.4, 125.8, 60.2, 51.3, 37.5, 32.3; HRMS (ESI) calcd for  $\text{C}_{24}\text{H}_{26}\text{N}^+$  ( $\text{M}+\text{H}$ ) $^+$  328.20598, found 328.20548. The ee was determined to be 70% by

HPLC analysis (Chiralpak OD,  $\lambda = 254$  nm, hexane/isopropanol = 90:10, flow rate = 1.0 mL/min):  $t_R$  (minor) = 23.9 min,  $t_R$  (major) = 10.3 min.

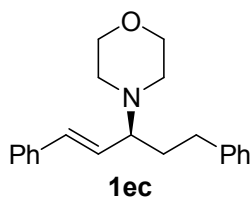

Amine **1ec**, light yellow oil;  $[\alpha]_D^{20} = -18.5$  ( $c = 1.05$ ,  $\text{CHCl}_3$ );  $^1\text{H NMR}$  (400 MHz,  $\text{CDCl}_3$ )  $\delta$  7.40-7.14 (m, 10H), 6.46 (d,  $J = 16.0$  Hz, 1H), 6.15 (dd,  $J = 16.0, 8.8$  Hz, 1H), 3.76-3.64 (m, 4H), 2.95-2.88 (m, 1H), 2.76-2.68 (m, 1H), 2.66-2.58 (m, 3H), 2.54-2.47 (m, 2H), 2.12-2.02 (m, 1H), 1.87-1.77 (m, 1H);  $^{13}\text{C NMR}$  (100 MHz,  $\text{CDCl}_3$ )  $\delta$  142.1, 136.7, 133.3, 129.0, 128.6, 128.4, 128.3, 127.5, 126.3, 125.7, 67.4, 67.2, 50.3, 33.5, 32.4; HRMS (ESI) calcd for  $\text{C}_{21}\text{H}_{26}\text{ON}^+$  ( $\text{M}+\text{H}$ ) $^+$  308.20089, found 308.20041. The ee was determined to be 43% by HPLC analysis (Chiralpak AD,  $\lambda = 254$  nm, hexane/isopropanol = 95:5, flow rate = 1.0 mL/min):  $t_R$  (minor) = 11.1 min,  $t_R$  (major) = 8.3 min.

## References

- (1) M.-B. Li, H. Li, J. Wang, C.-R. Liu and S.-K. Tian, *Chem. Commun.*, 2013, **49**, 8190.
- (2) (a) A. G. Myers, B. Zheng and M. Movassaghi, *J. Org. Chem.*, 1997, **62**, 7507; (b) F.-L. Yang, X.-T. Ma and S.-K. Tian, *Chem.-Eur. J.*, 2012, **18**, 1582.
- (3) M. Sugiura, K. Hirano and S. Kobayashi, *J. Am. Chem. Soc.*, 2004, **126**, 7182.
- (4) M. Pallavicini, E. Valoti, L. Villa and O. Piccolo, *Tetrahedron: Asymmetry*, 2000, **11**, 4017.
- (5) X.-S. Wu, Y. Chen, M.-B. Li, M.-G. Zhou and S.-K. Tian, *J. Am. Chem. Soc.*, 2012, **134**, 14694.
- (6) E. G. Klauber, N. Mittal, T. K. Shah and D. Seidel, *Org. Lett.*, 2011, **13**, 2464.
- (7) Y. Wang, M. Li, X. Ma, C. Liu, Y. Gu and S.-K. Tian, *Chin. J. Chem.*, 2014, **32**, 741.
- (8) A. R. Katritzky, D. Cheng and J. Li, *J. Org. Chem.*, 1998, **63**, 3438.
- (9) Z. Liu, Z. Cao and H. Du, *Org. Biomol. Chem.*, 2011, **9**, 5369.
- (10) K.-G. Shim, J. C. Park, C. S. Cho, S. C. Shim and Y. Yamamoto, *Chem. Commun.*, 2002, 852.
- (11) A. Jaganathan, R. J. Staples and B. Borhan, *J. Am. Chem. Soc.*, 2013, **135**, 14806.
- (12) J. A. Bishop, S. Lou and S. E. Schaus, *Angew. Chem., Int. Ed.*, 2009, **48**, 4337.
- (13) M. Lafrance, M. Roggen and E. M. Carreira, *Angew. Chem., Int. Ed.*, 2012, **51**, 3470.



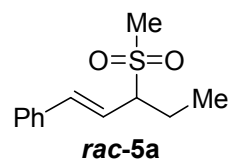

<sup>1</sup>H NMR (400 MHz, CDCl<sub>3</sub>)

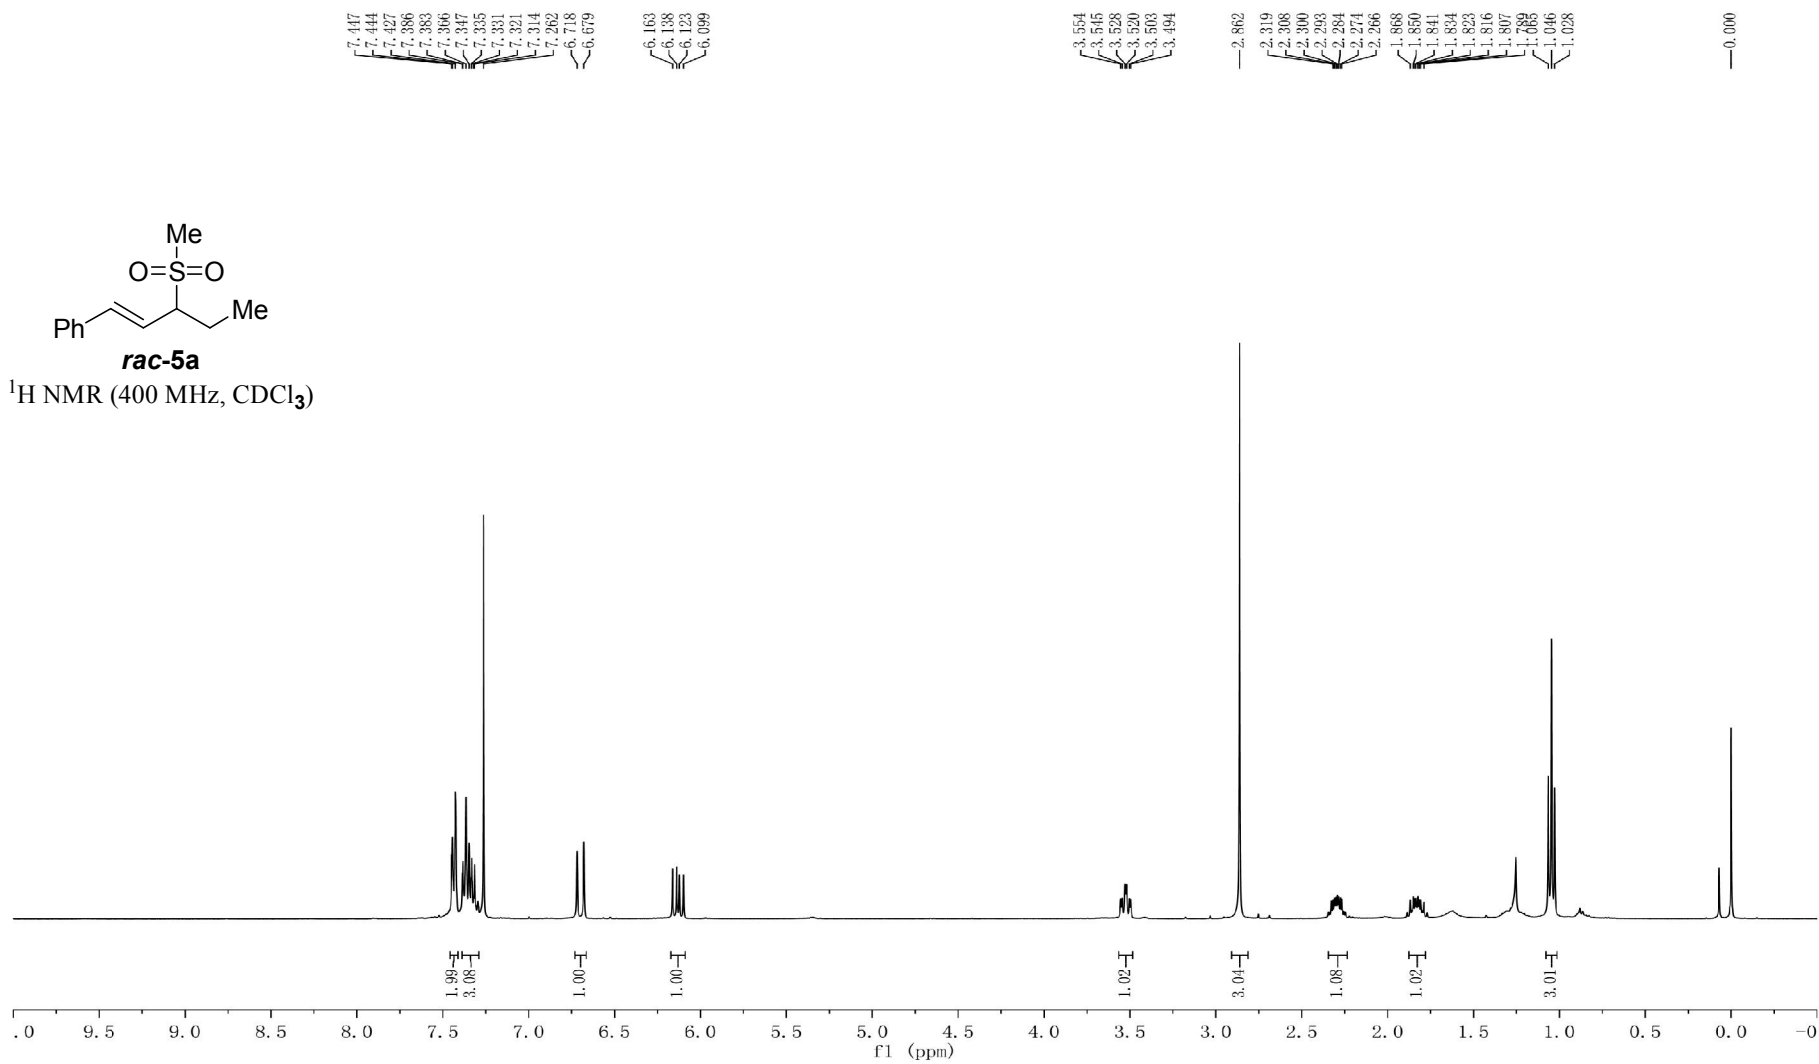

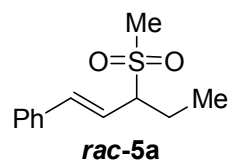

<sup>13</sup>C NMR (100 MHz, CDCl<sub>3</sub>)

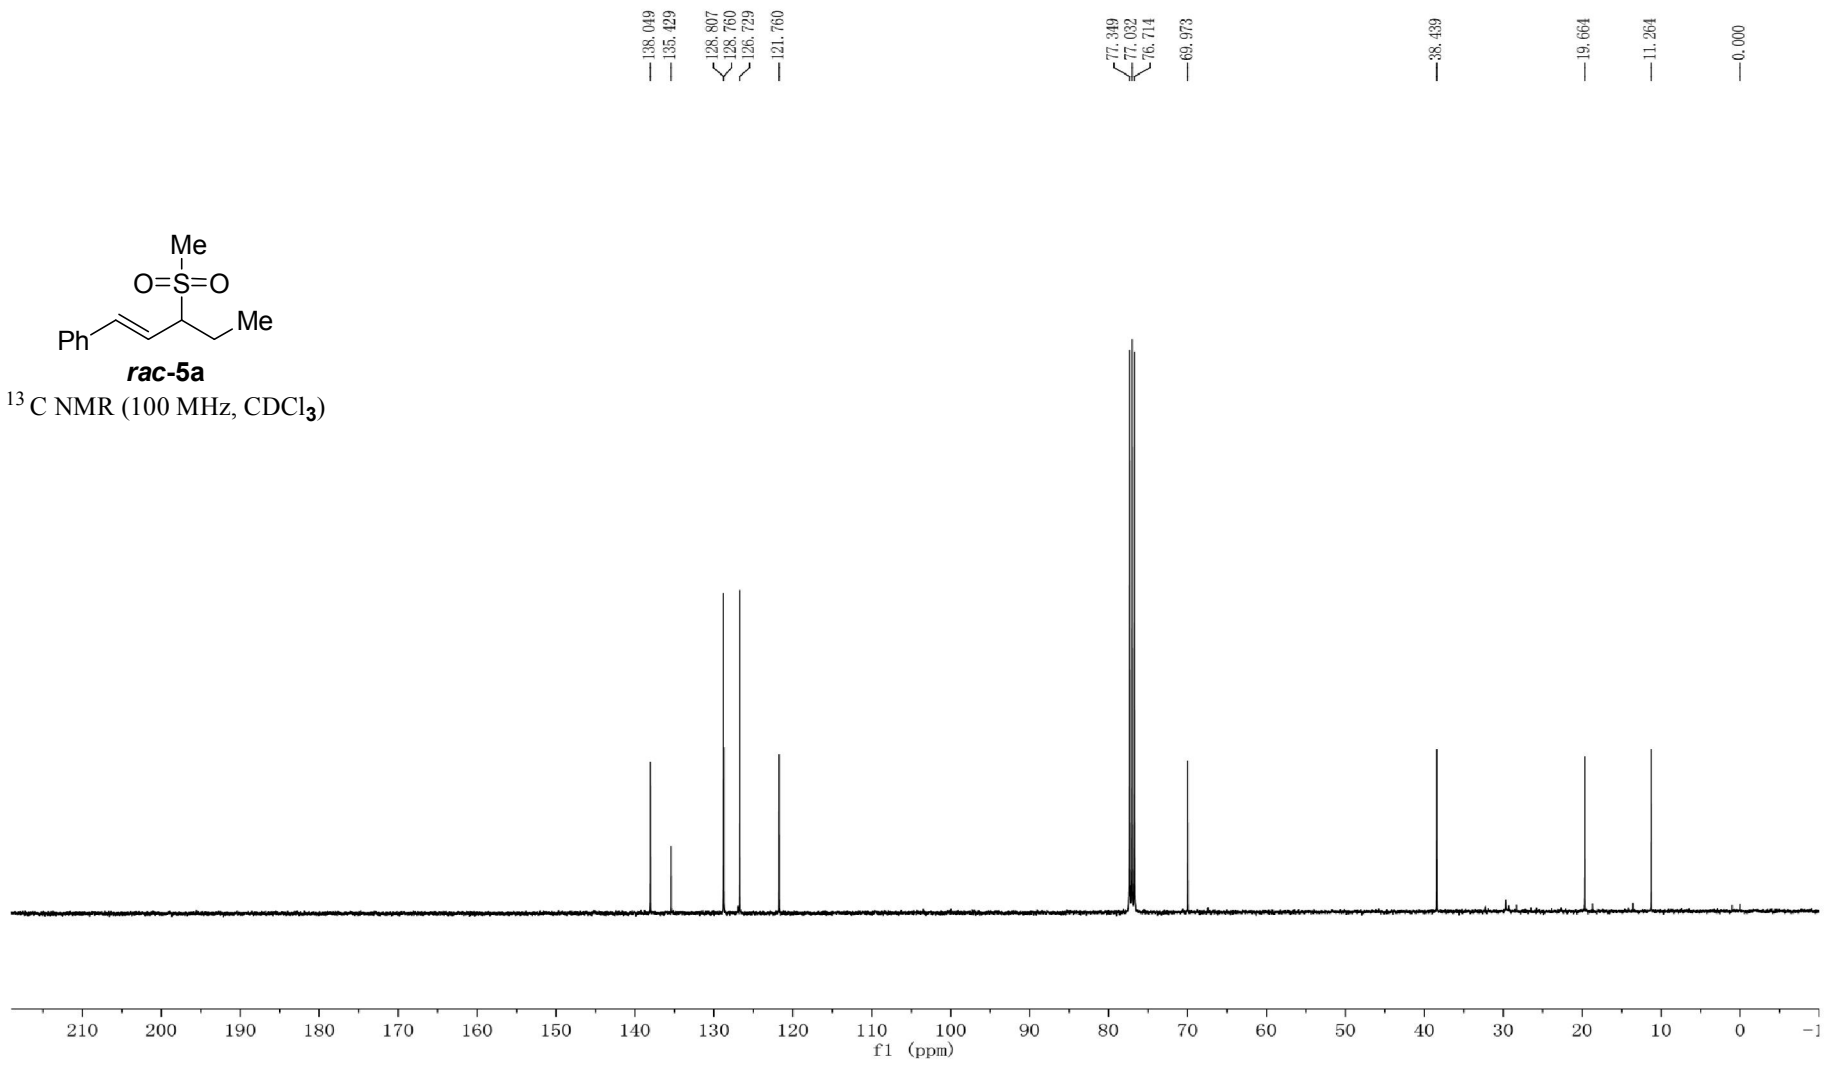

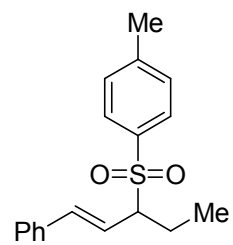

**rac-5b**

$^1\text{H NMR}$  (400 MHz,  $\text{CDCl}_3$ )

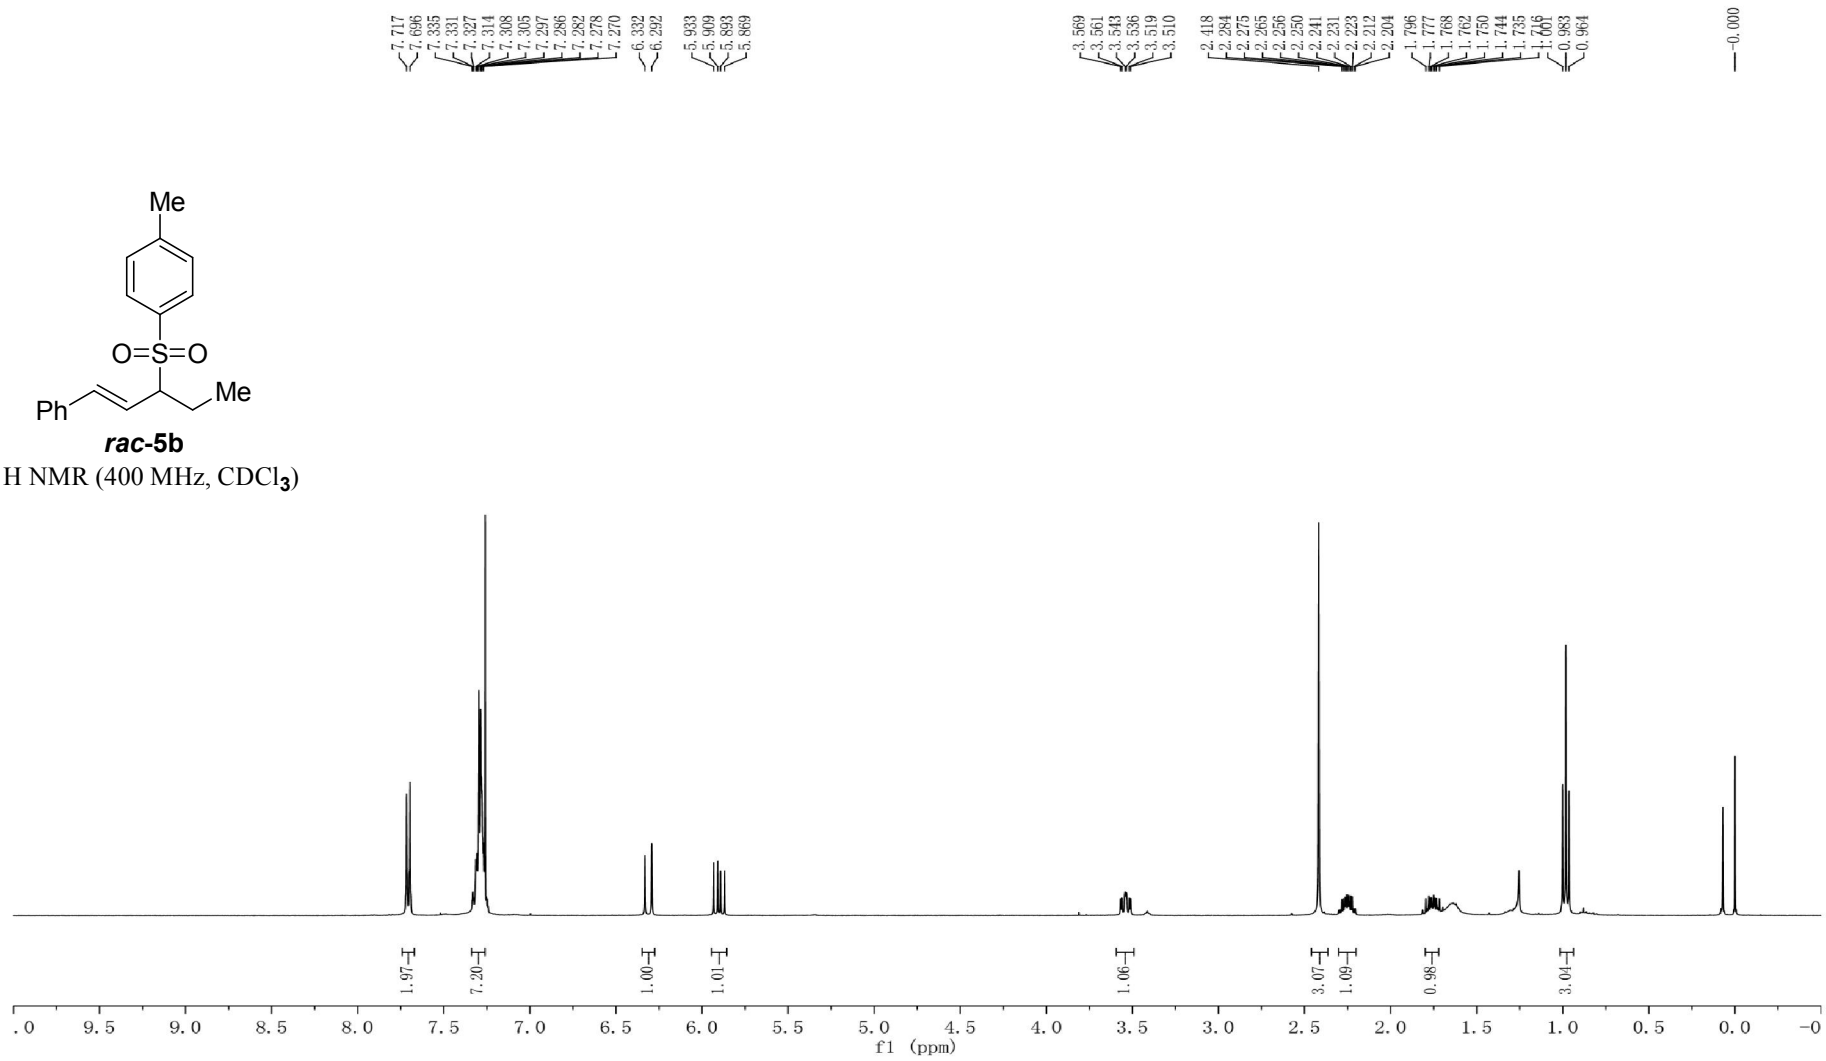

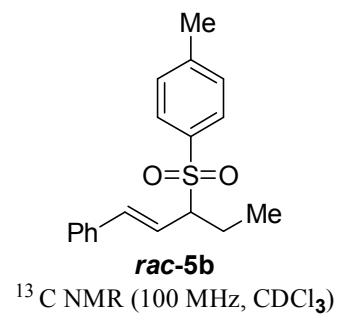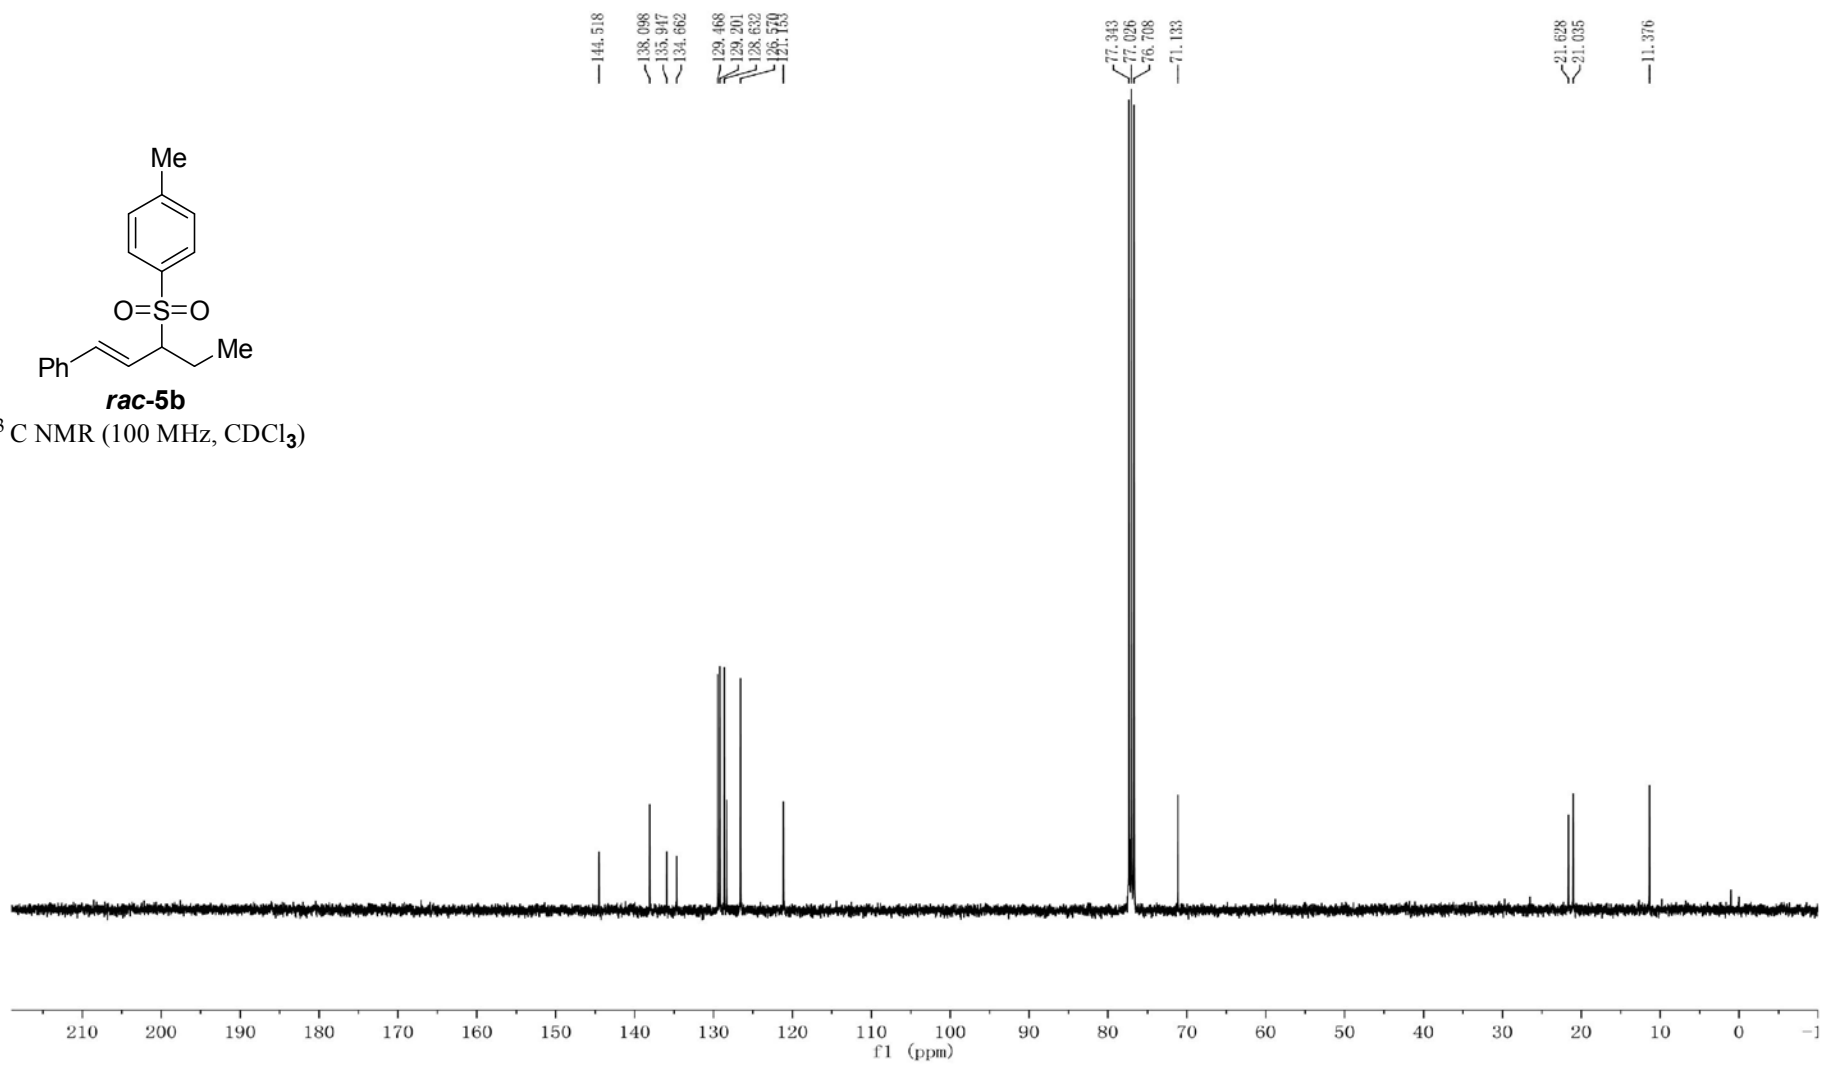

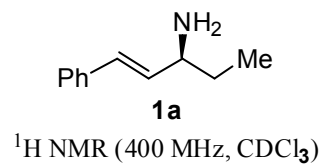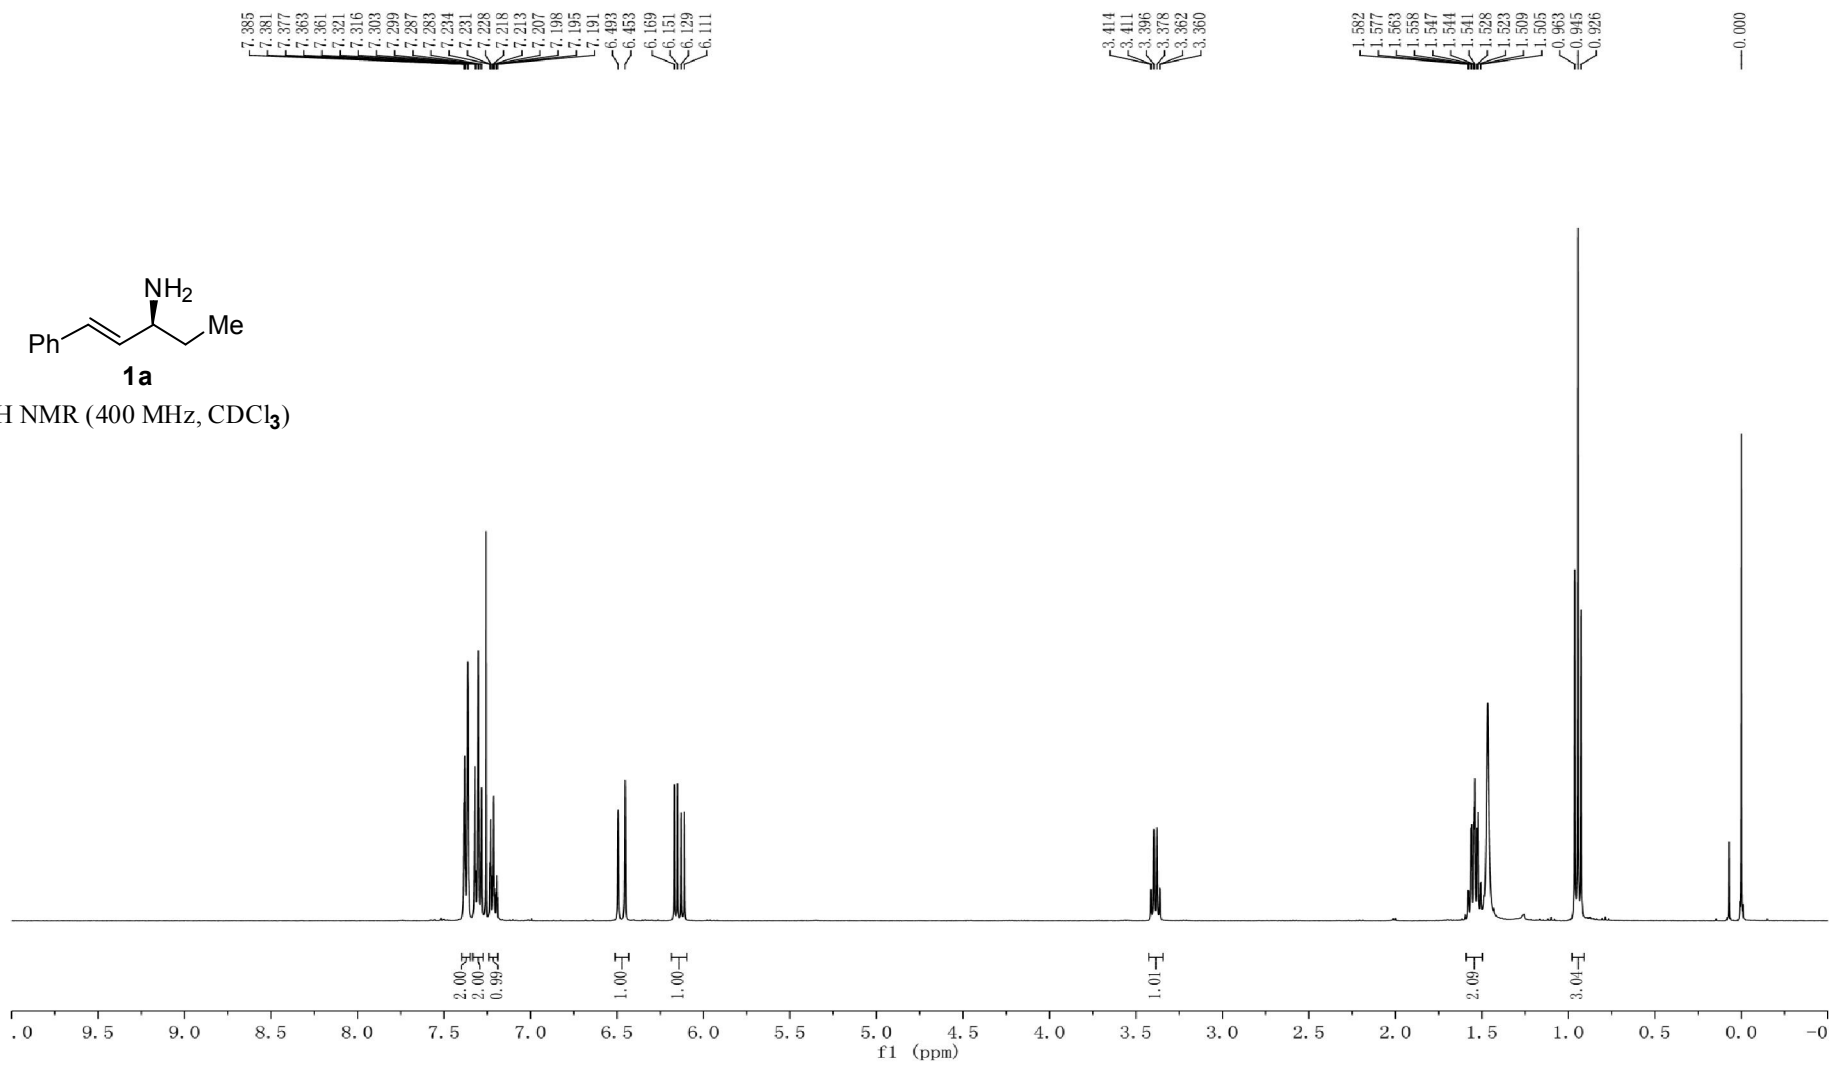

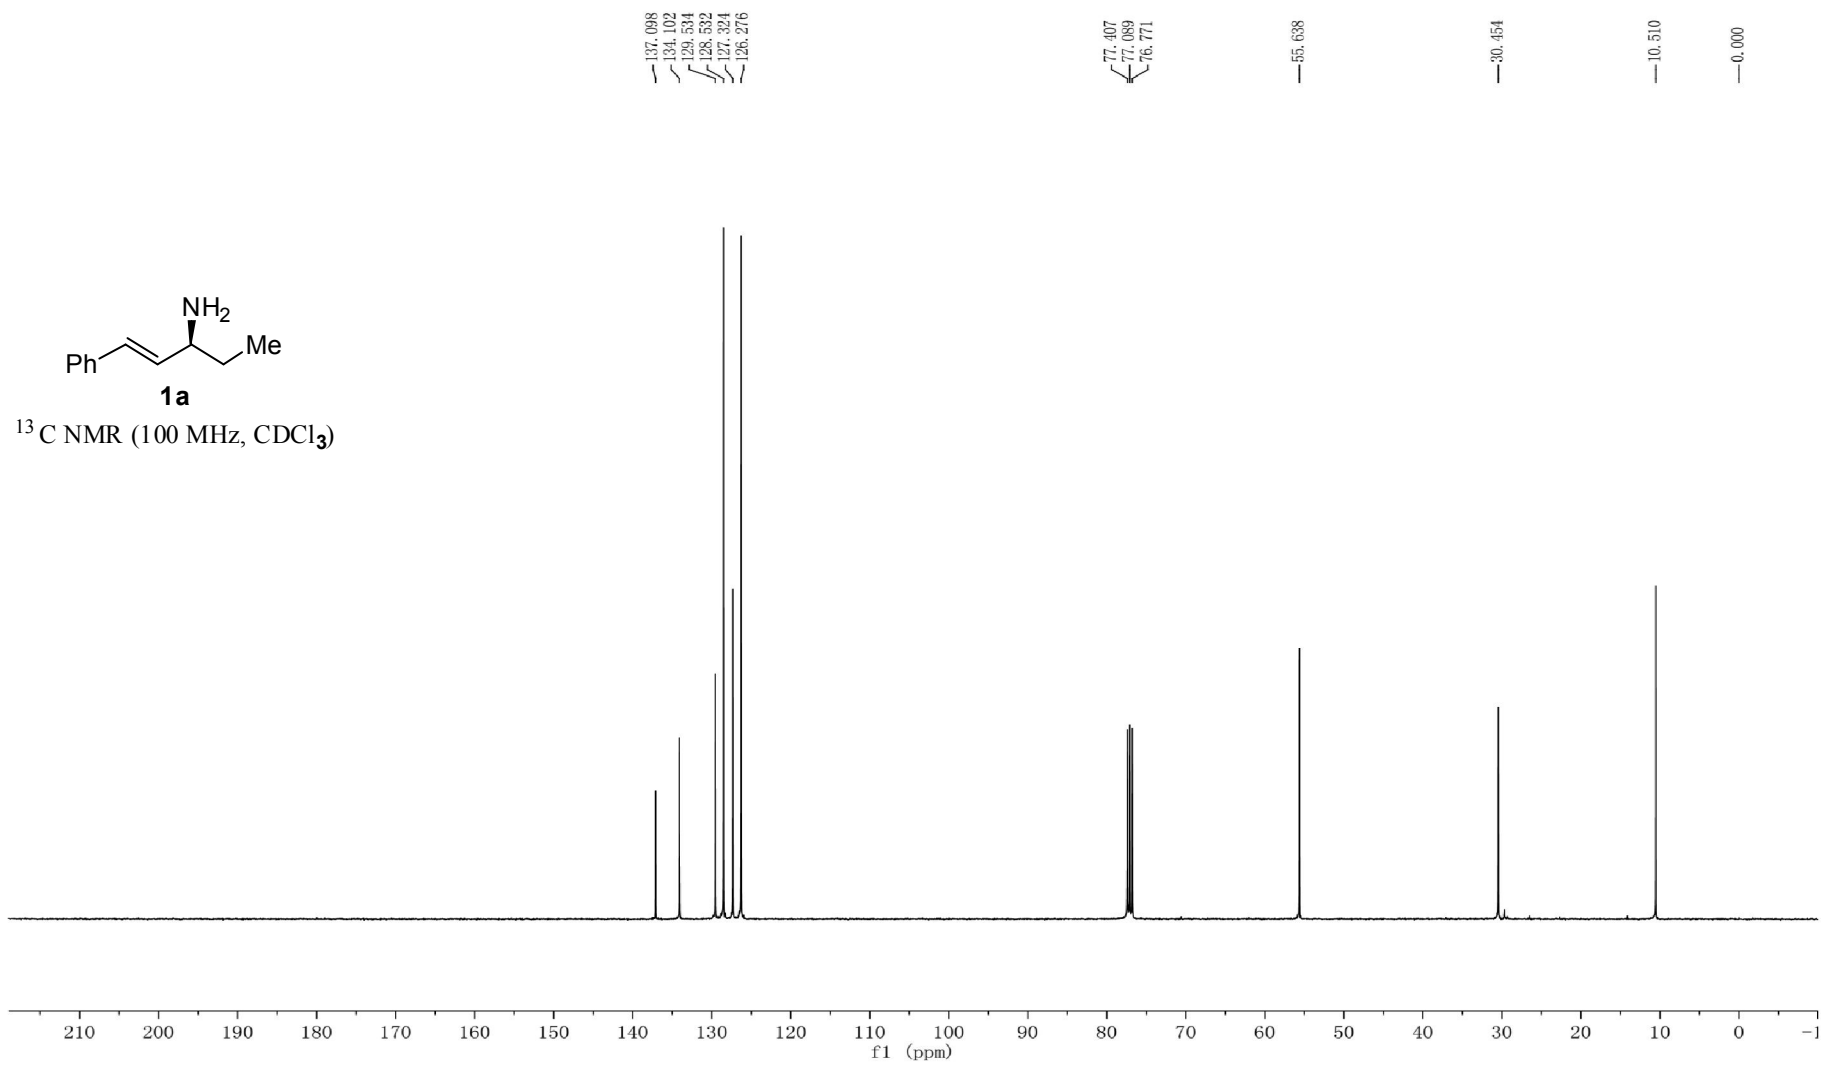

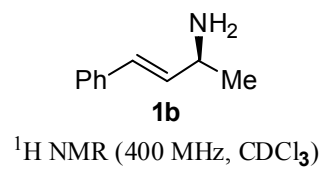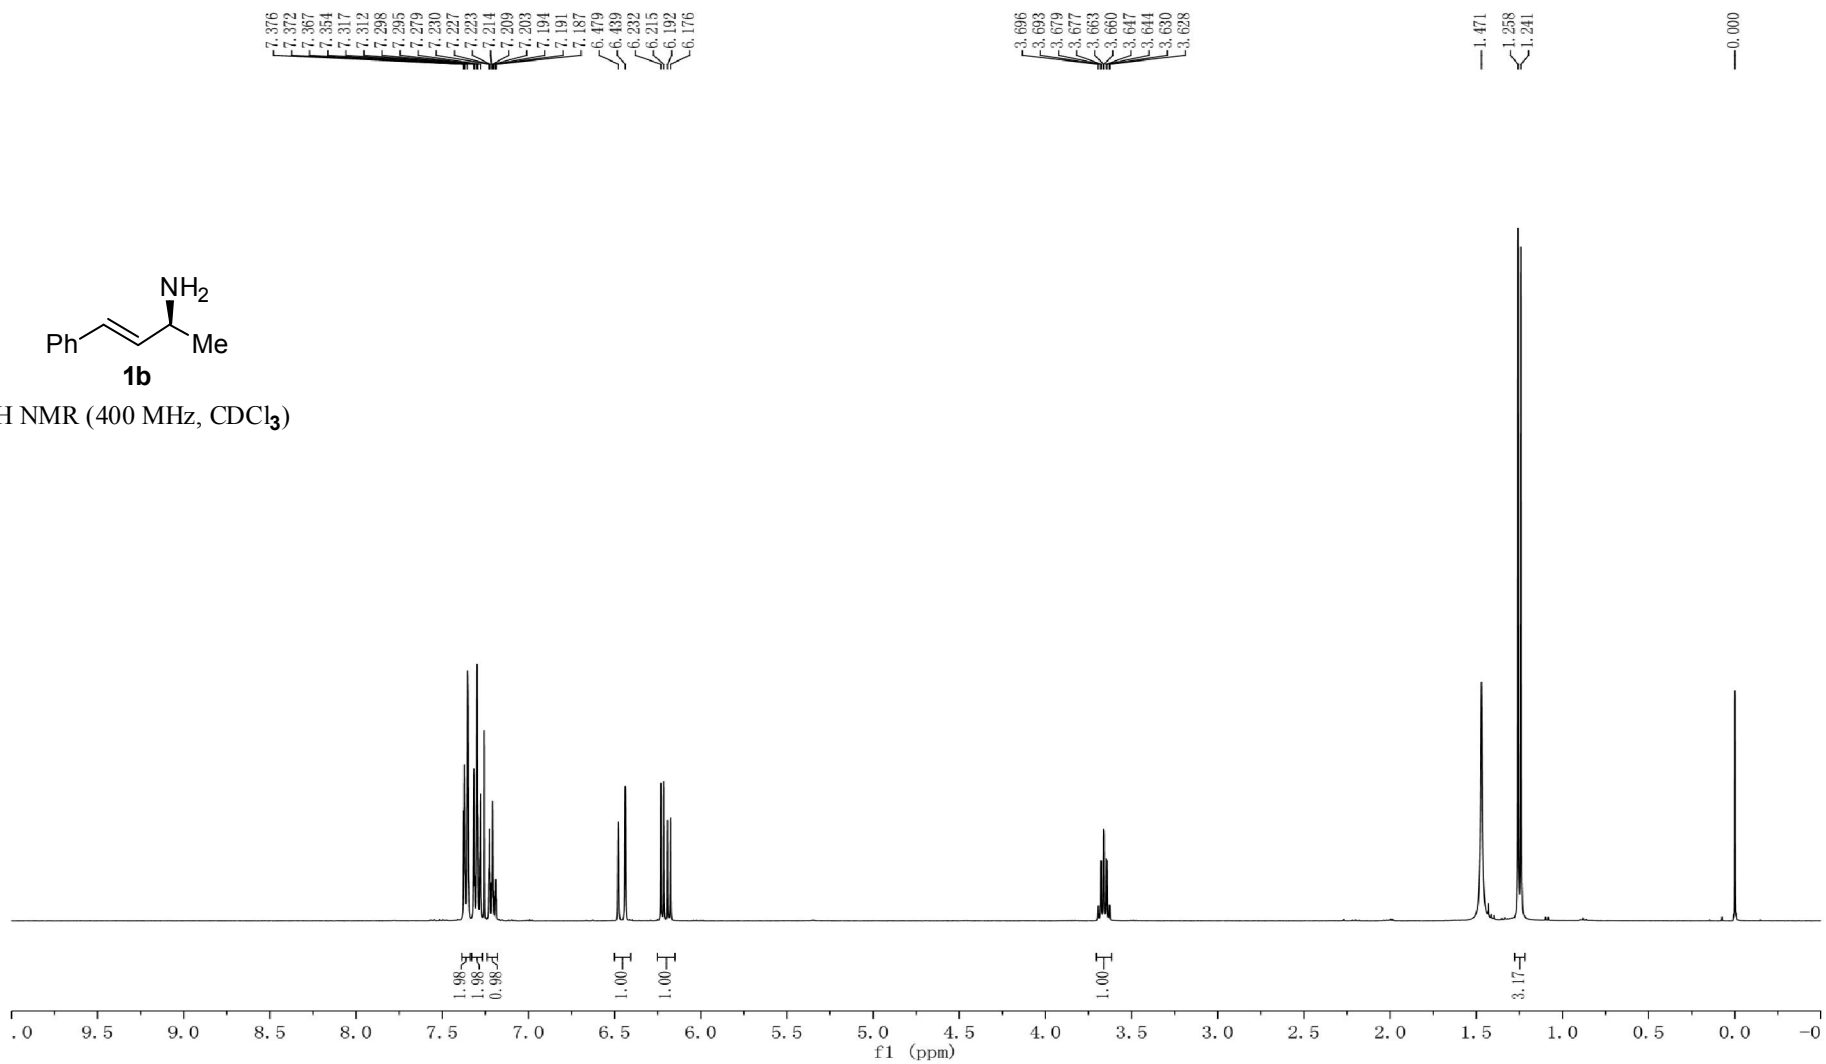

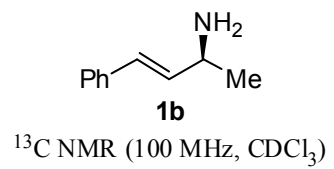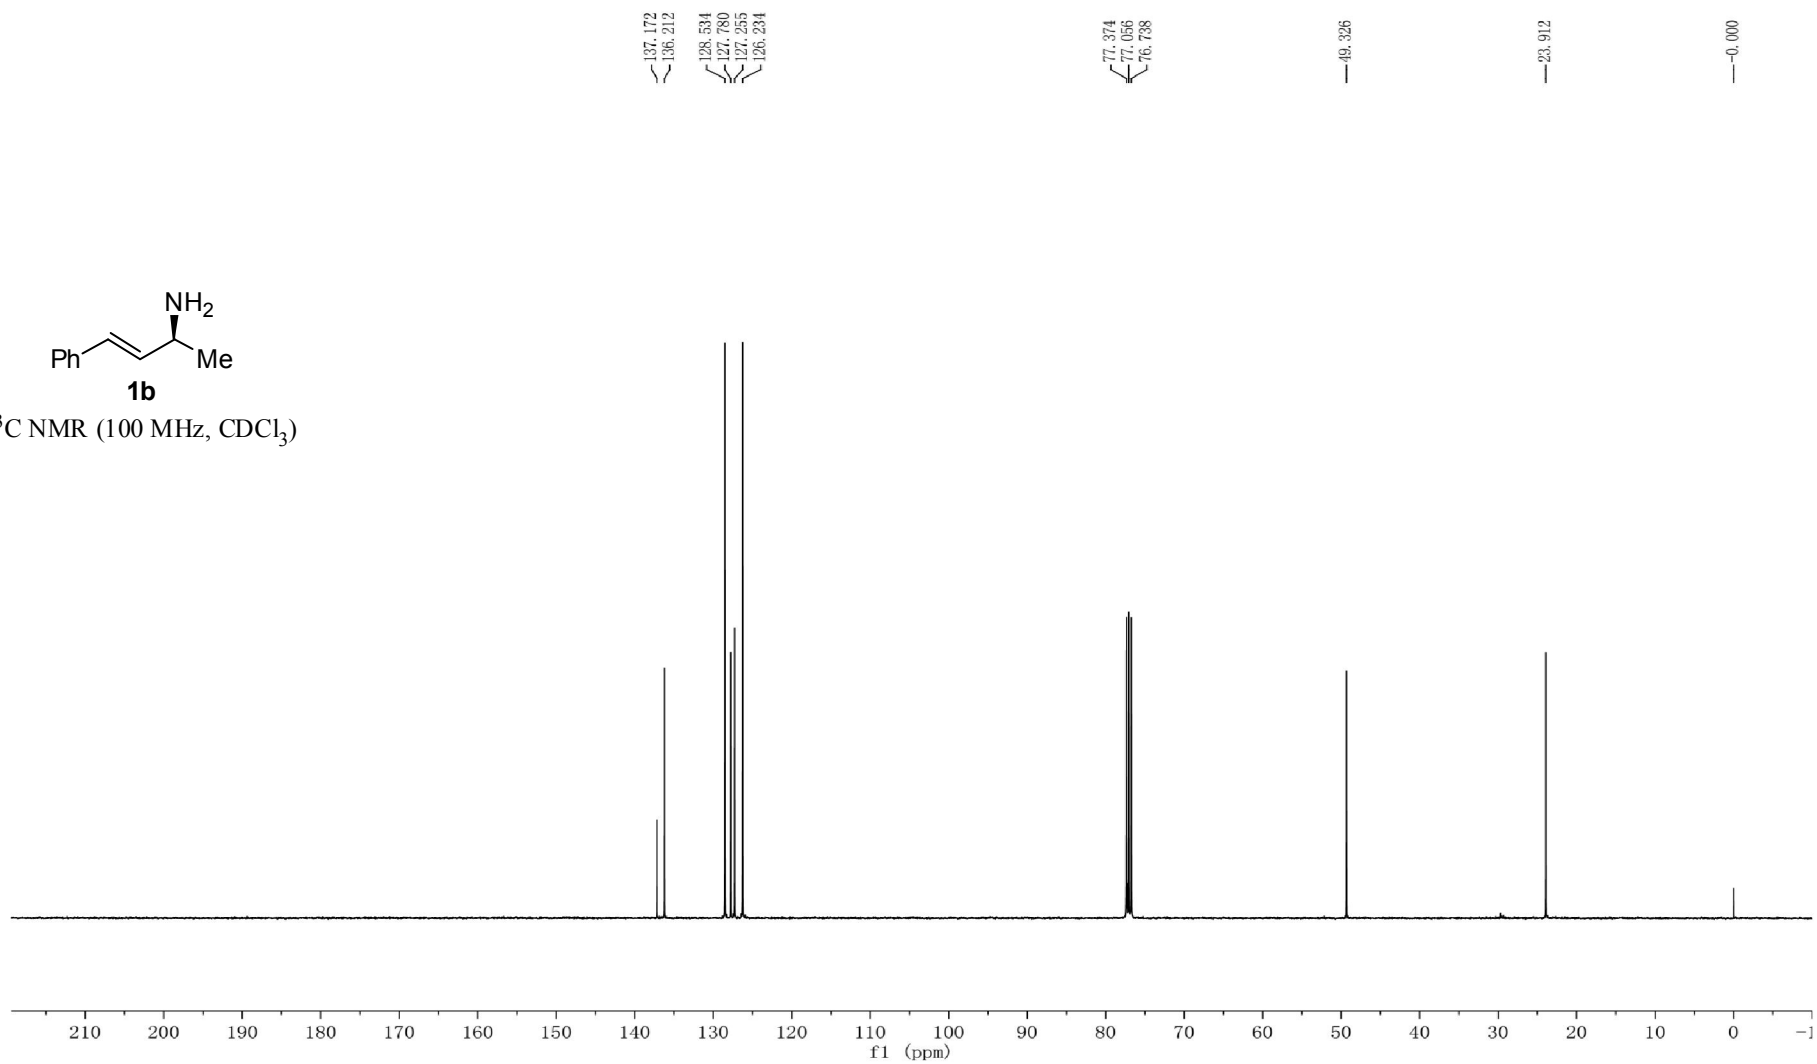



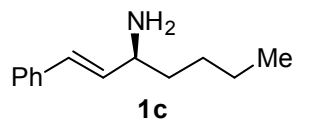

<sup>1</sup>H NMR (400 MHz, CDCl<sub>3</sub>)

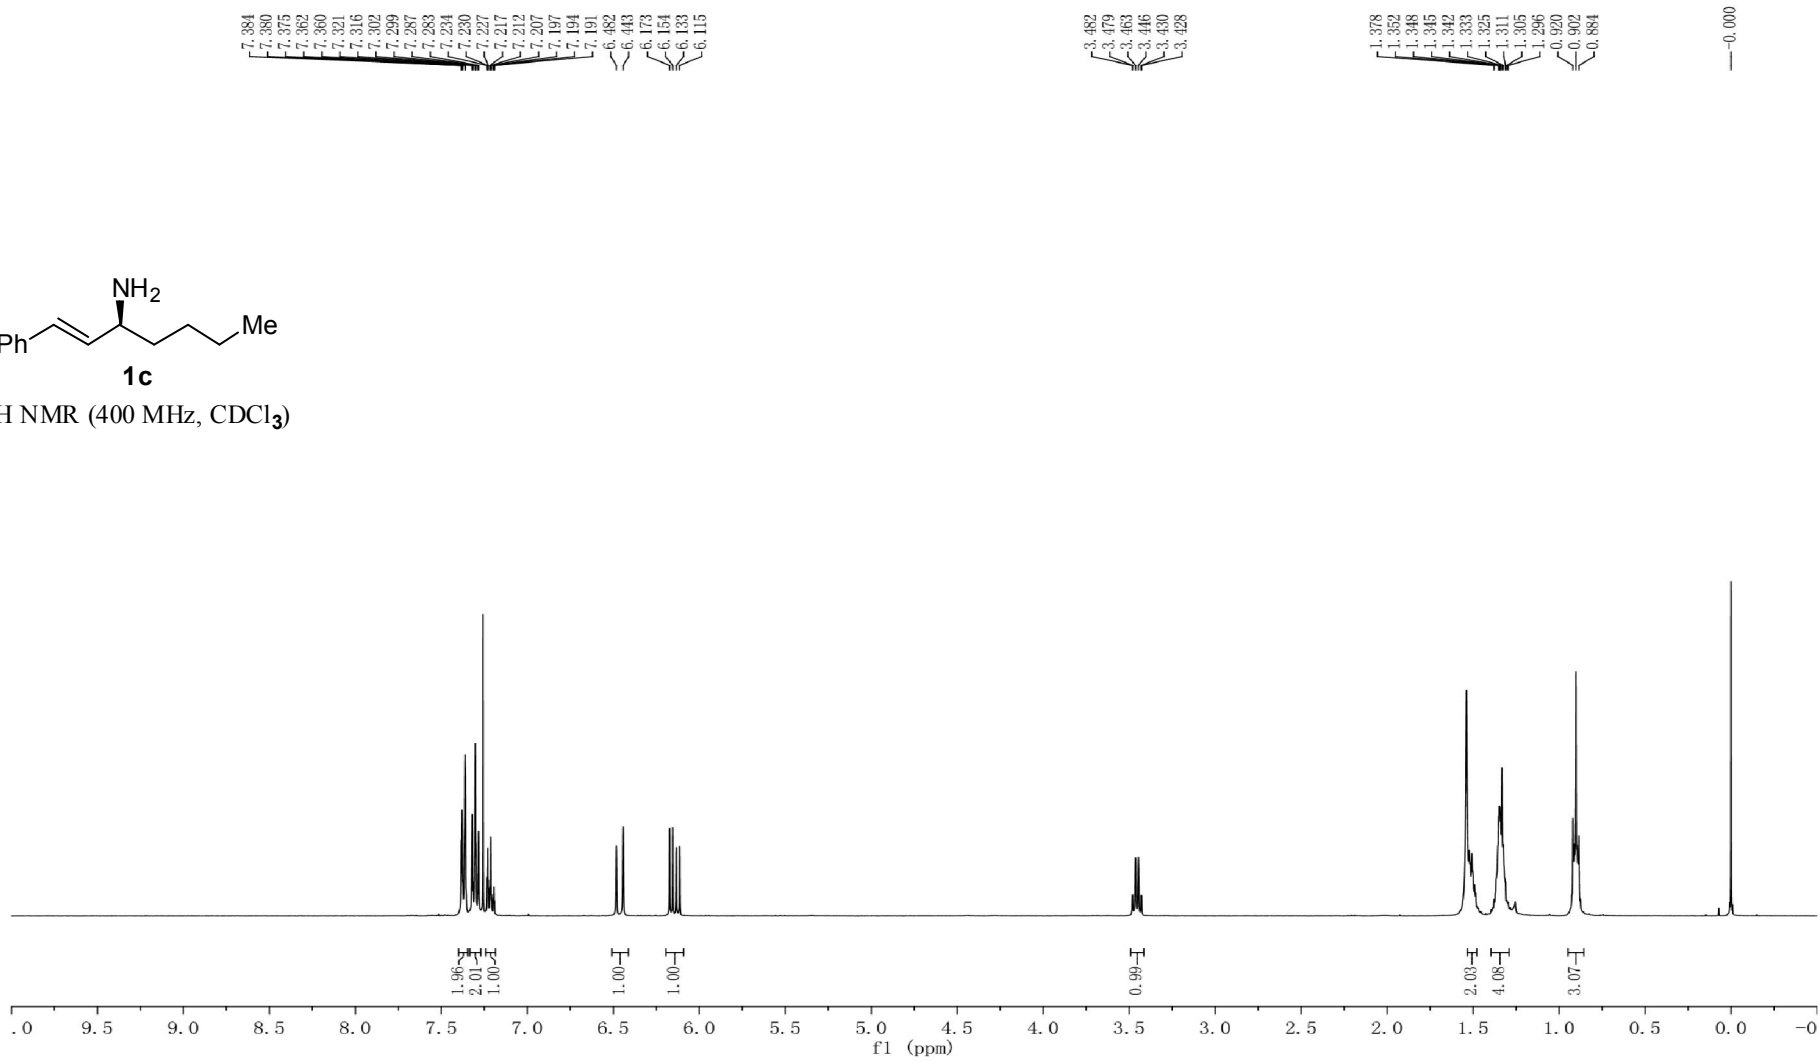

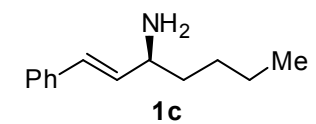

$^{13}\text{C}$  NMR (100 MHz,  $\text{CDCl}_3$ )

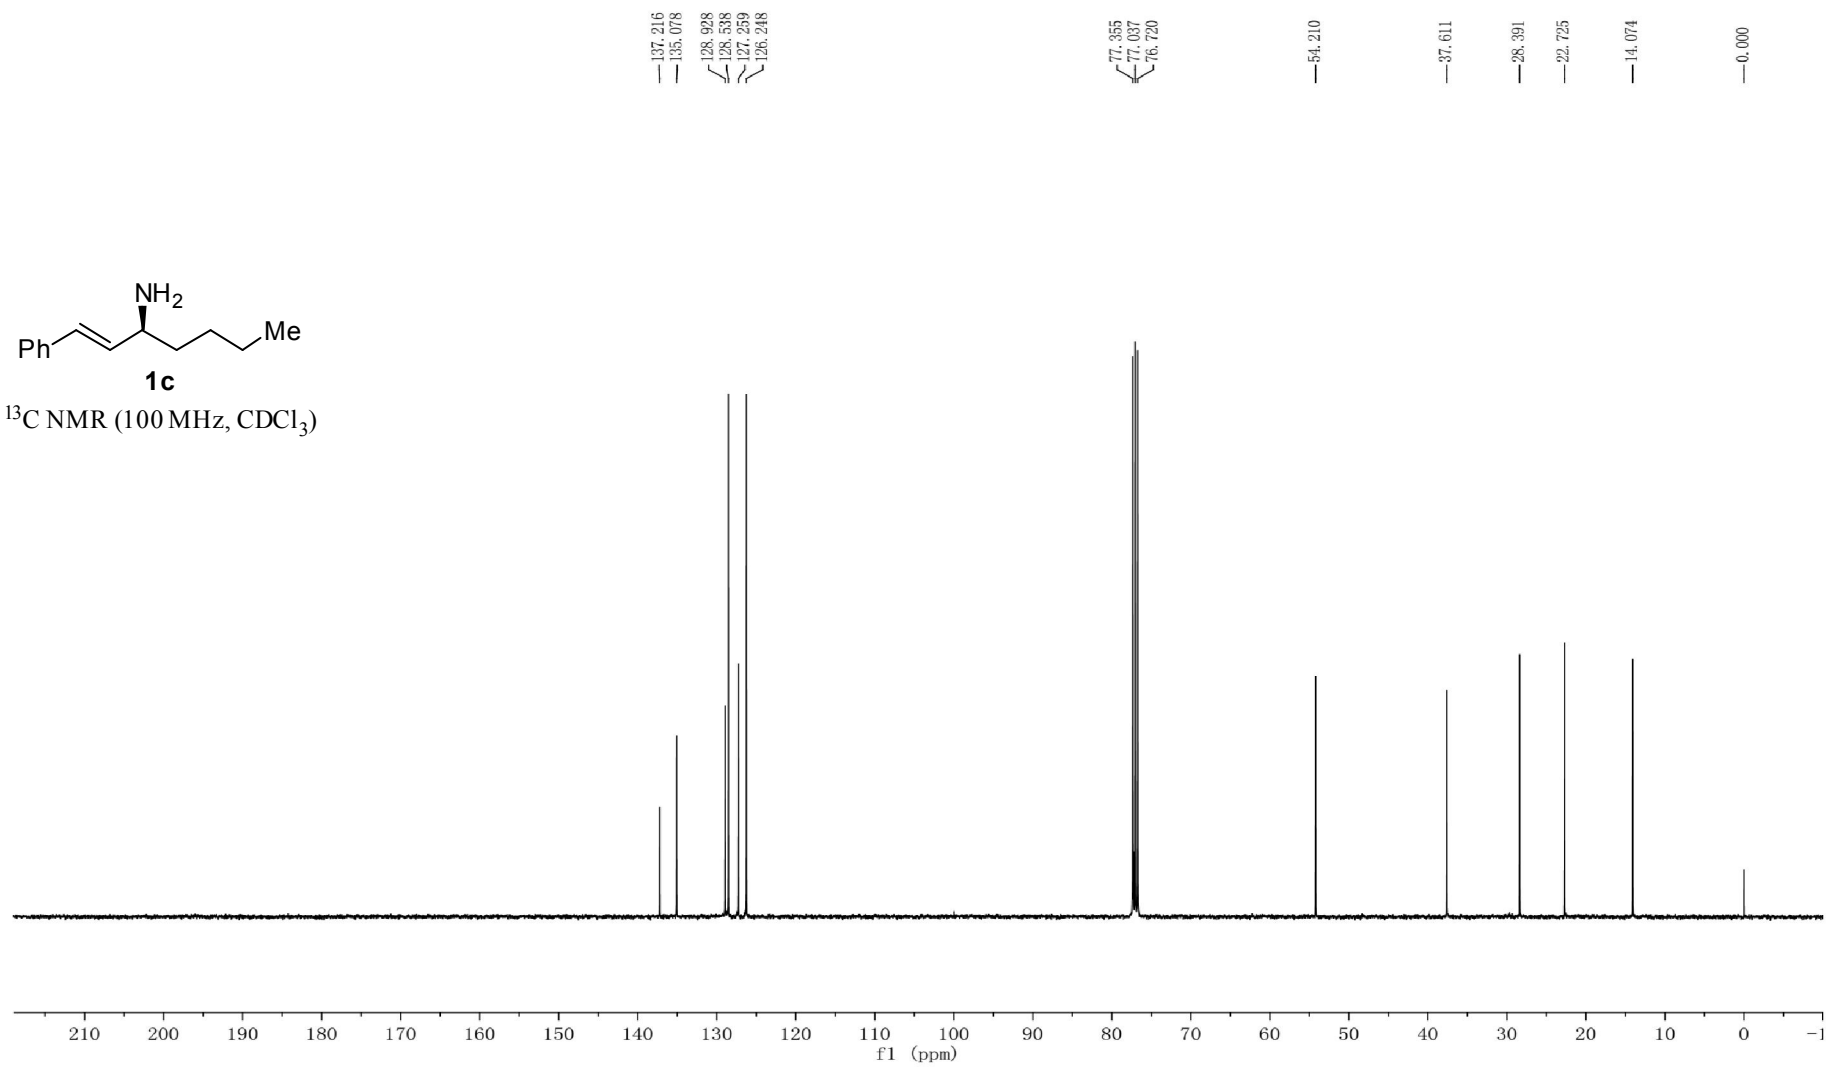

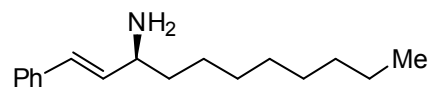

<sup>1</sup>H NMR (400 MHz, CDCl<sub>3</sub>)

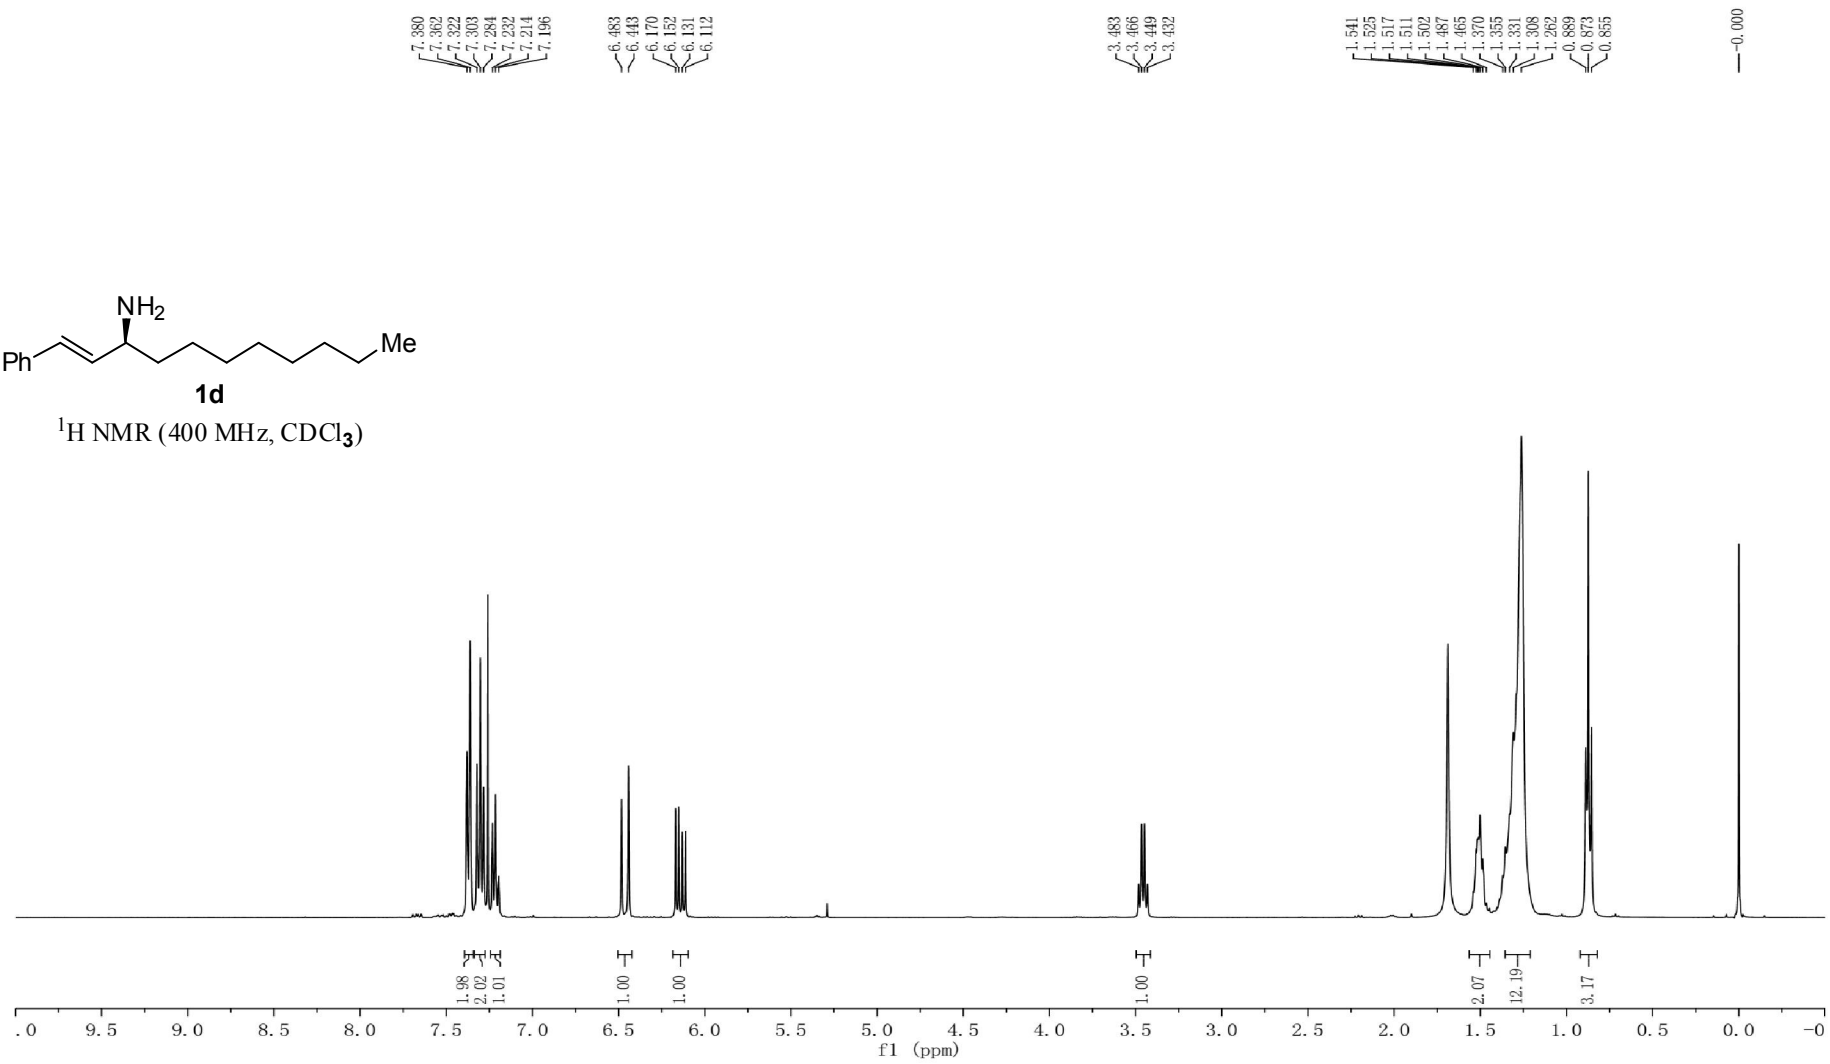

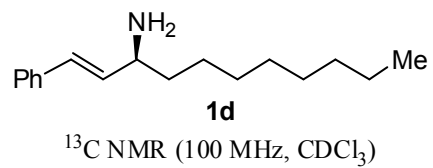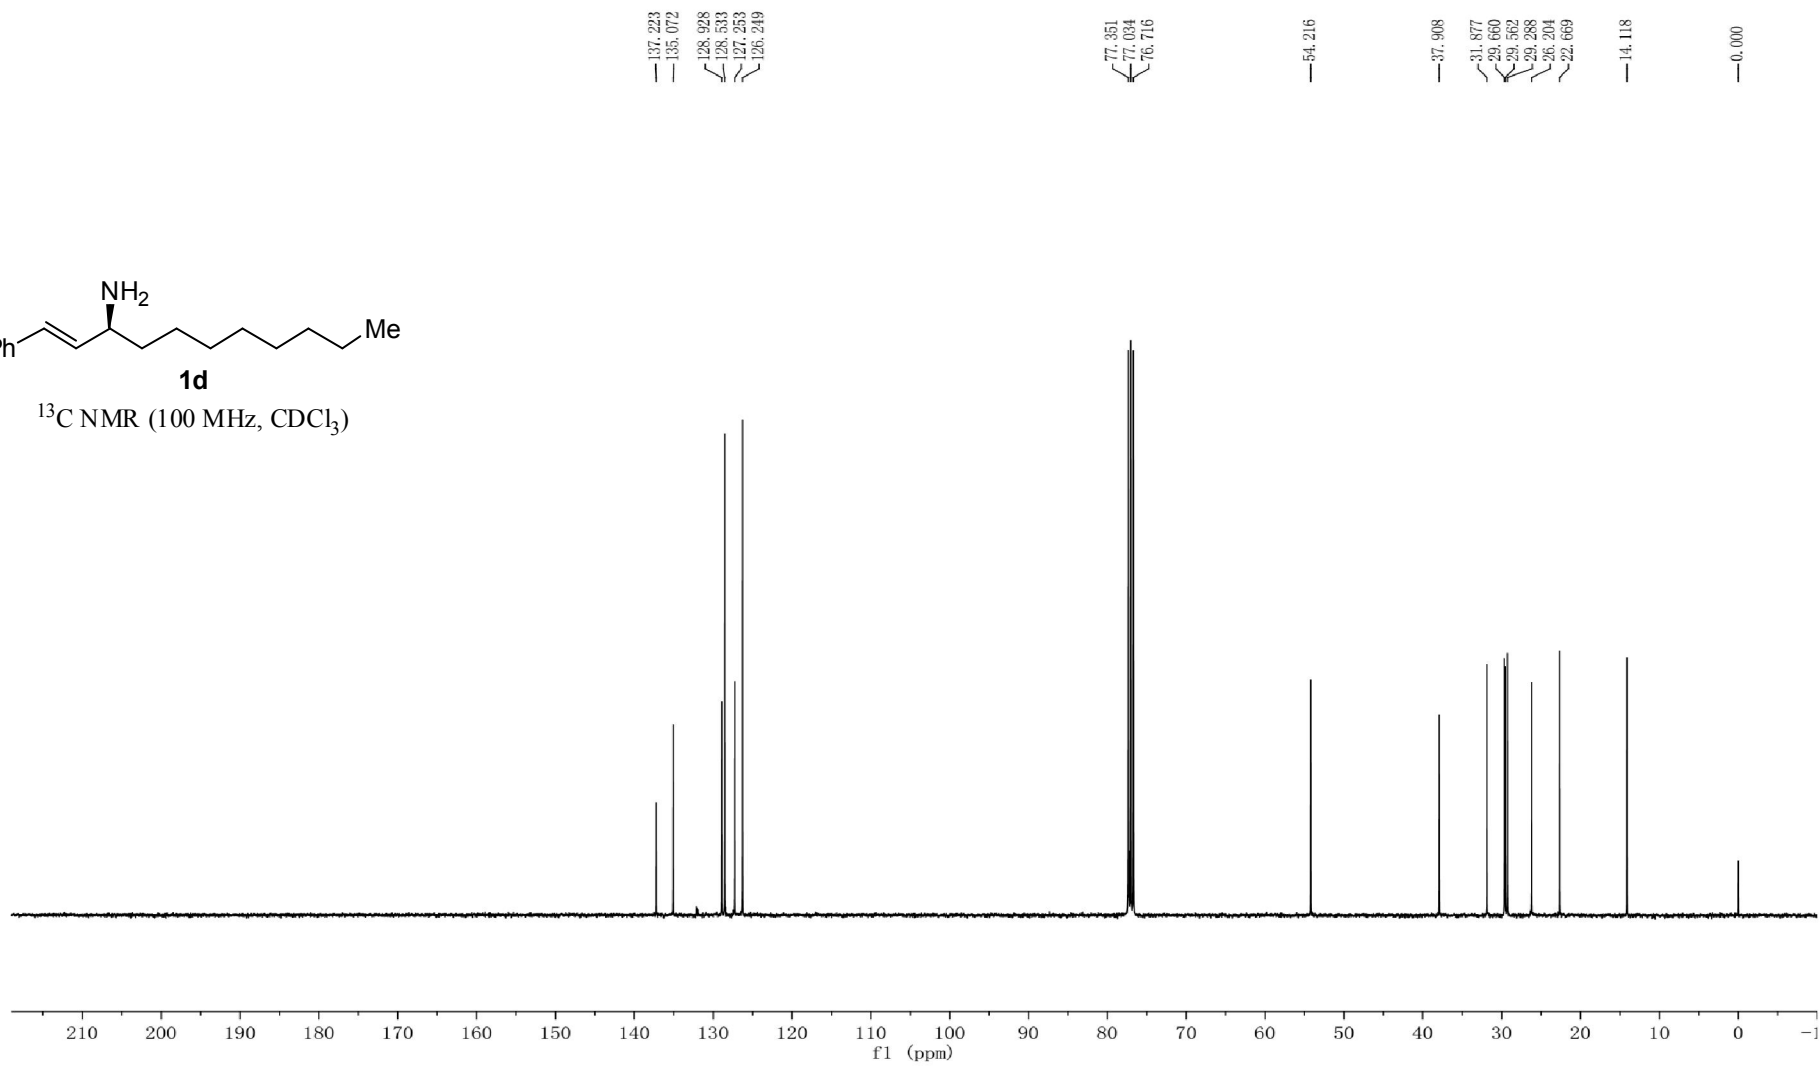

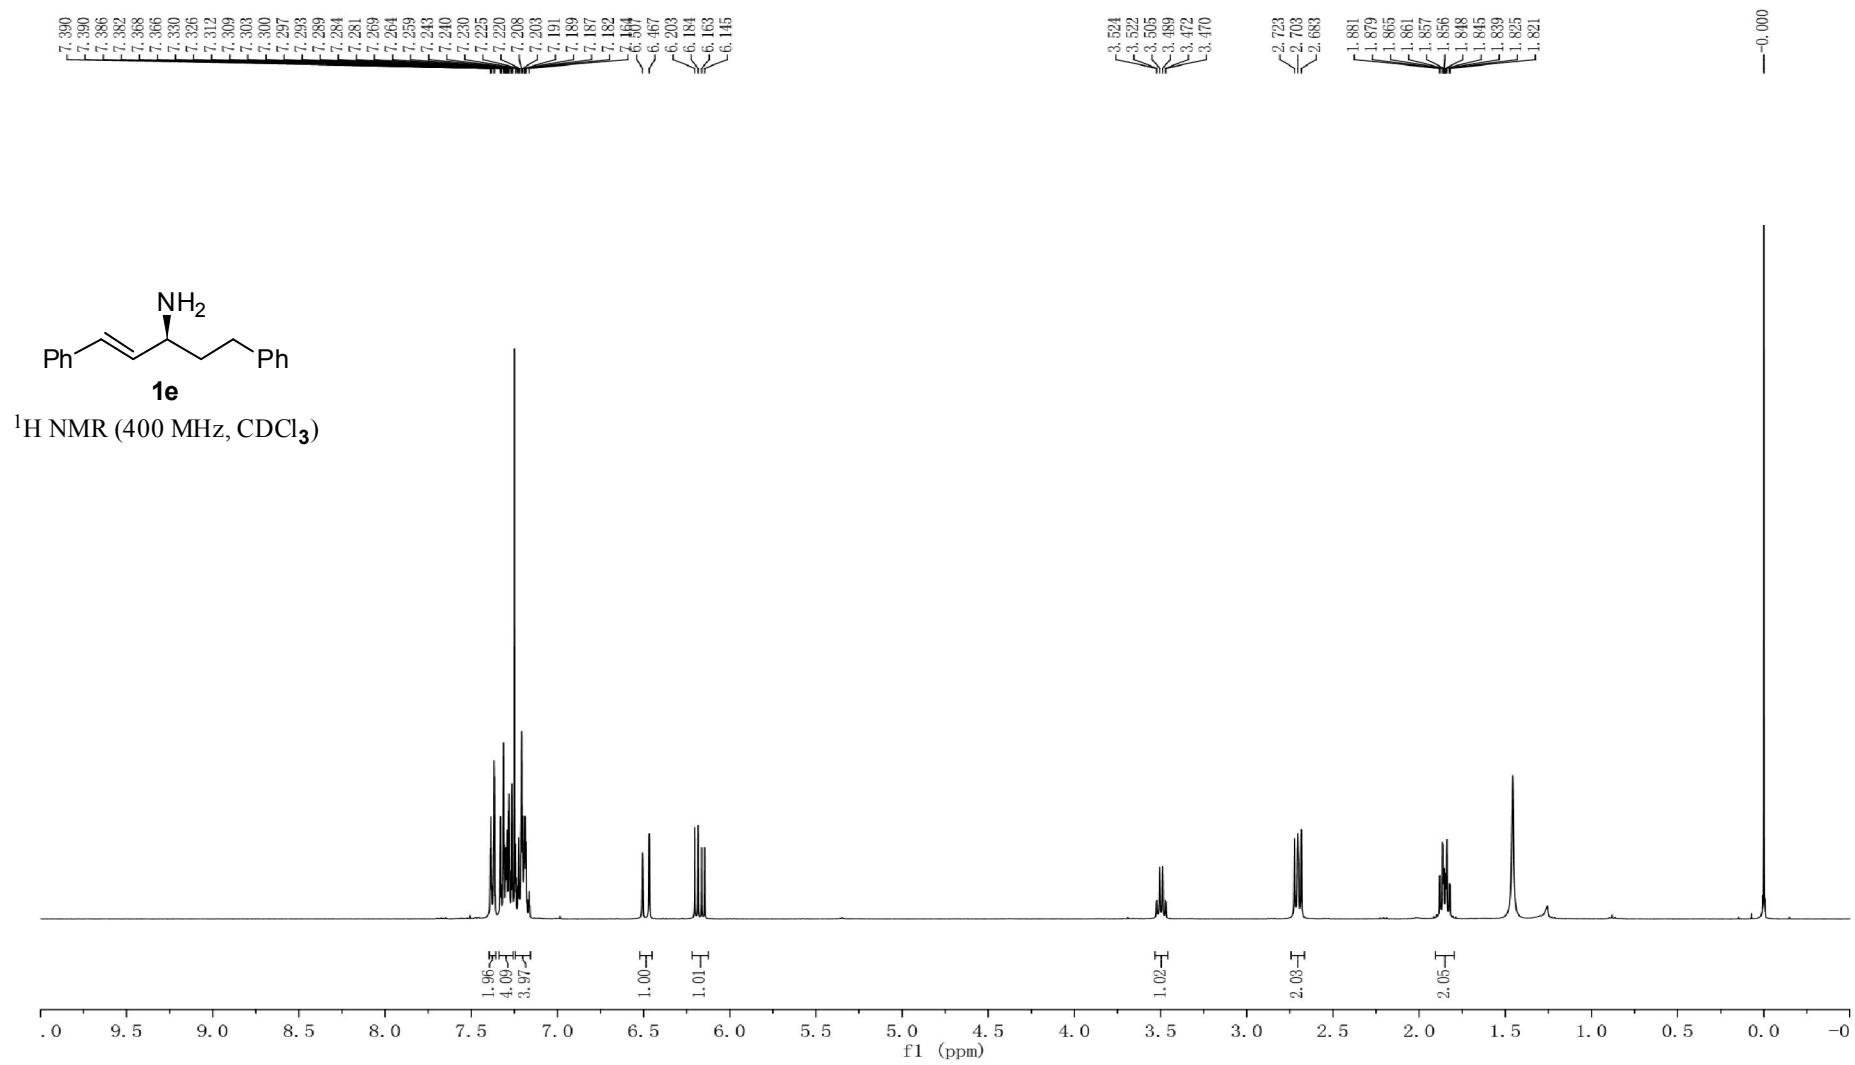

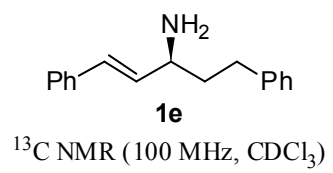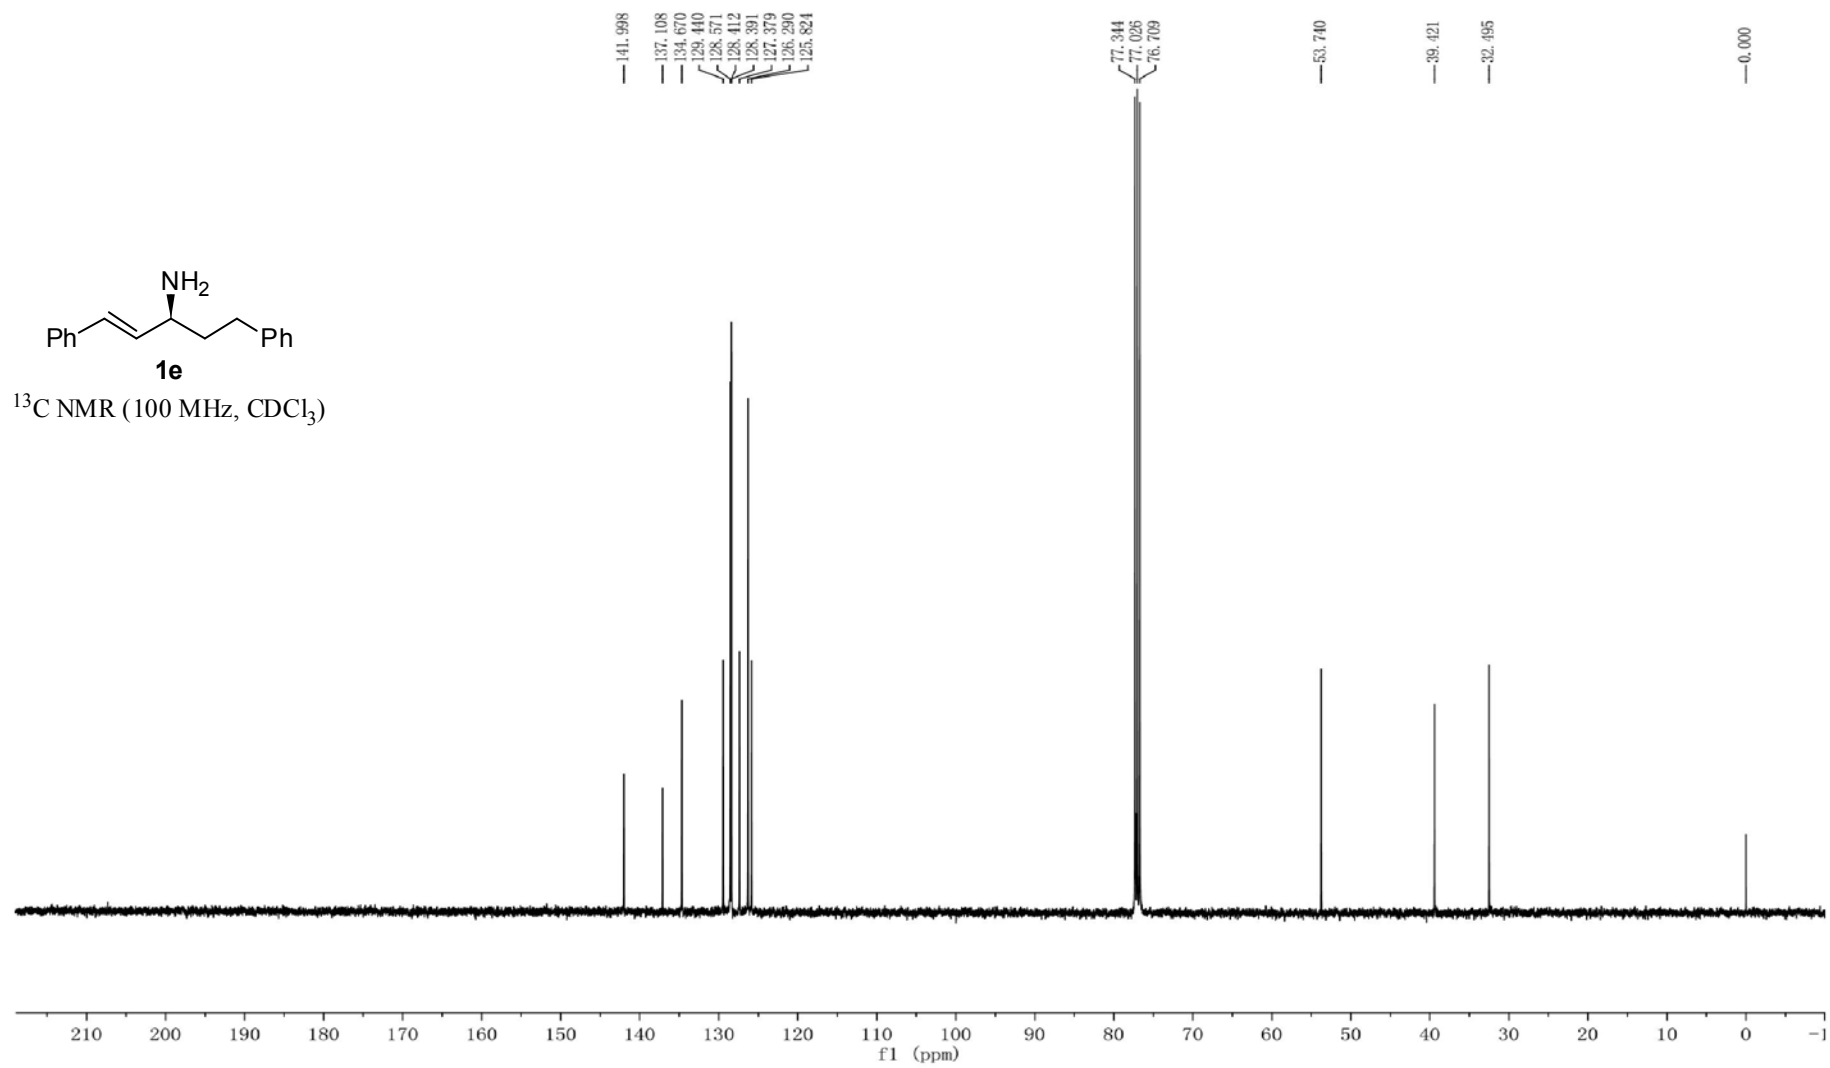

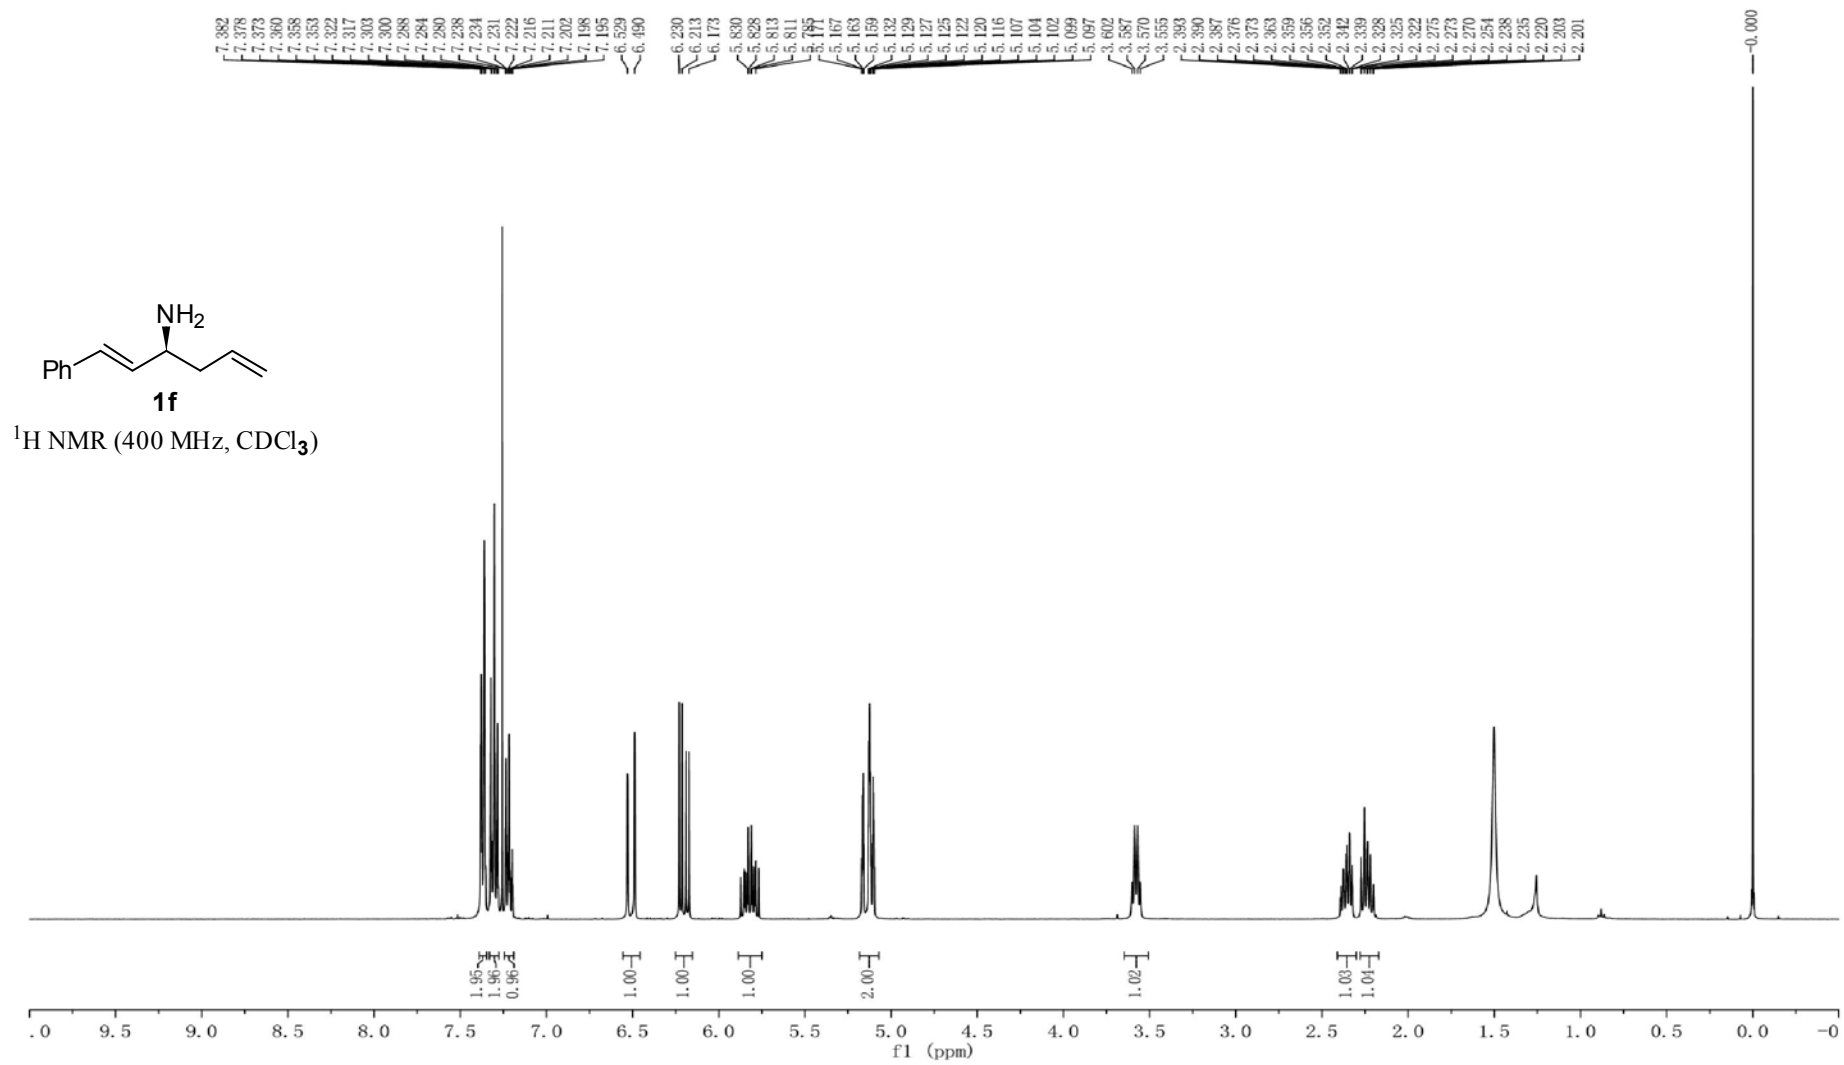

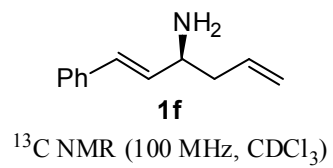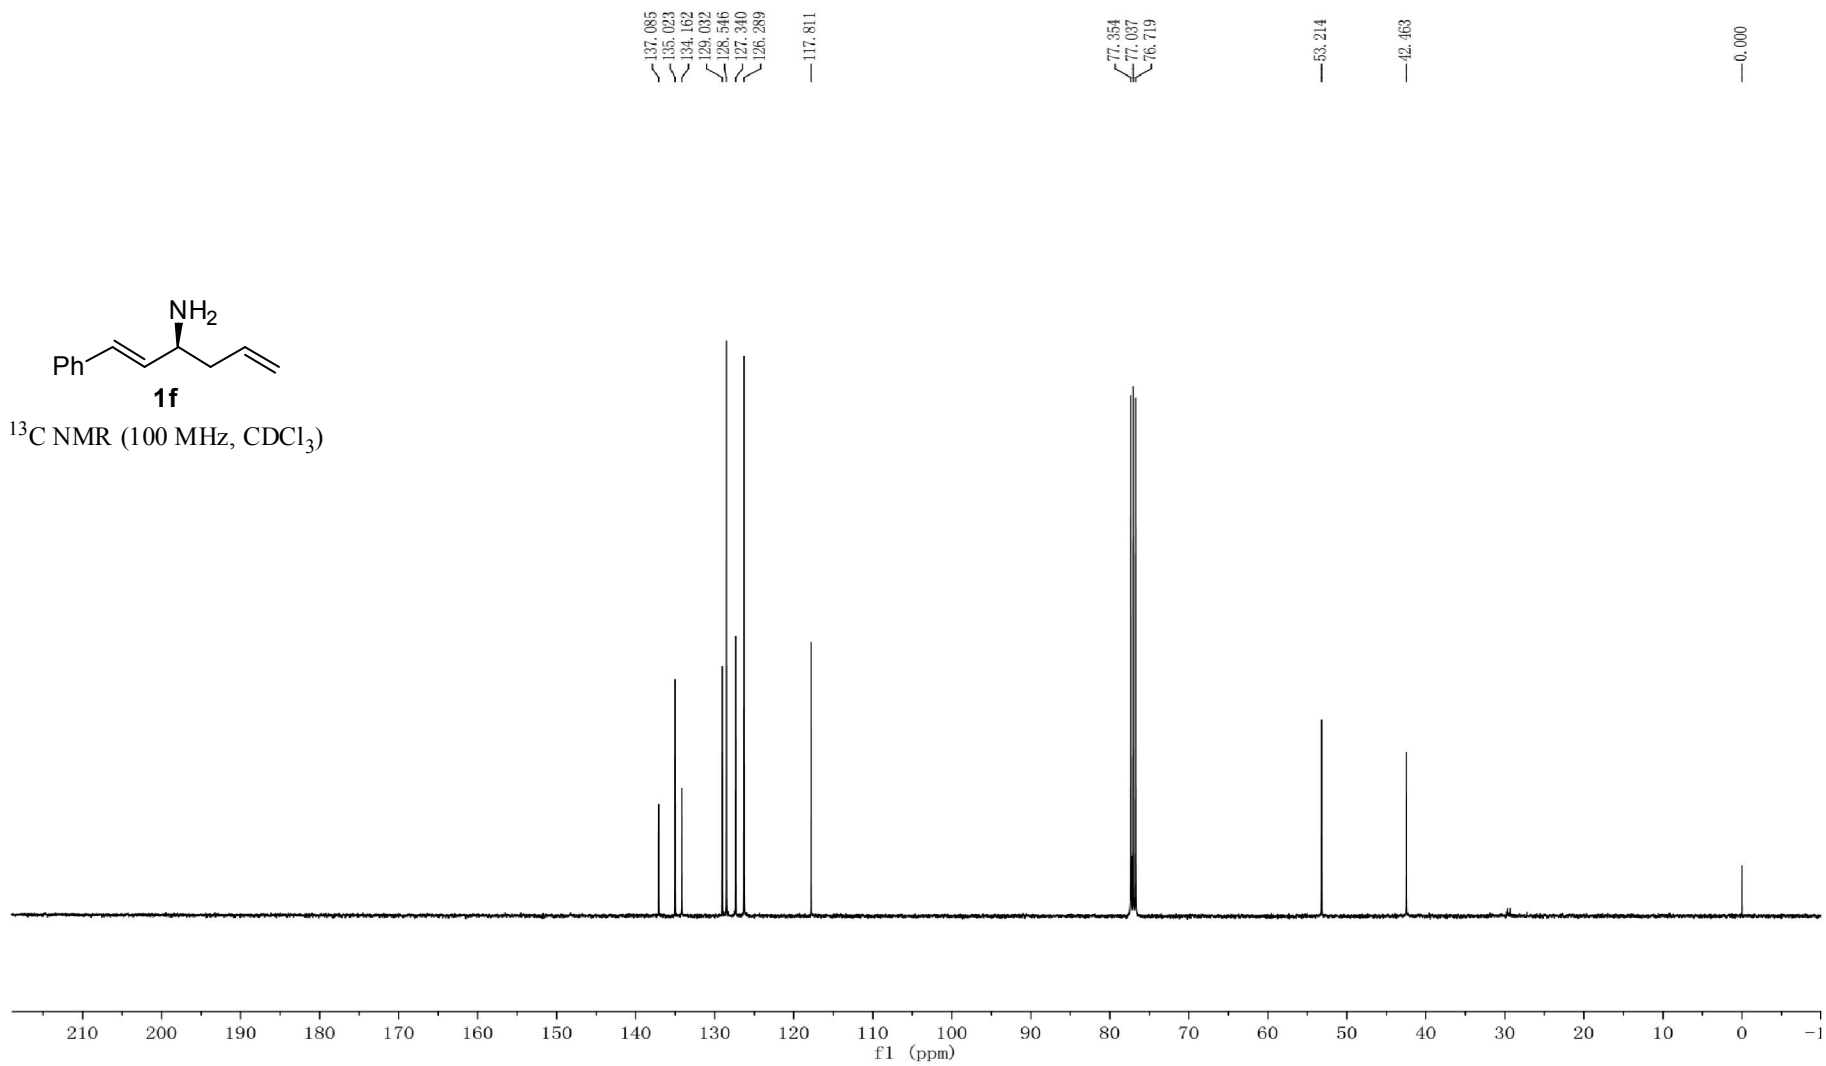



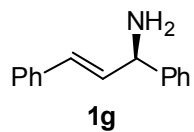

<sup>1</sup>H NMR (400 MHz, CDCl<sub>3</sub>)

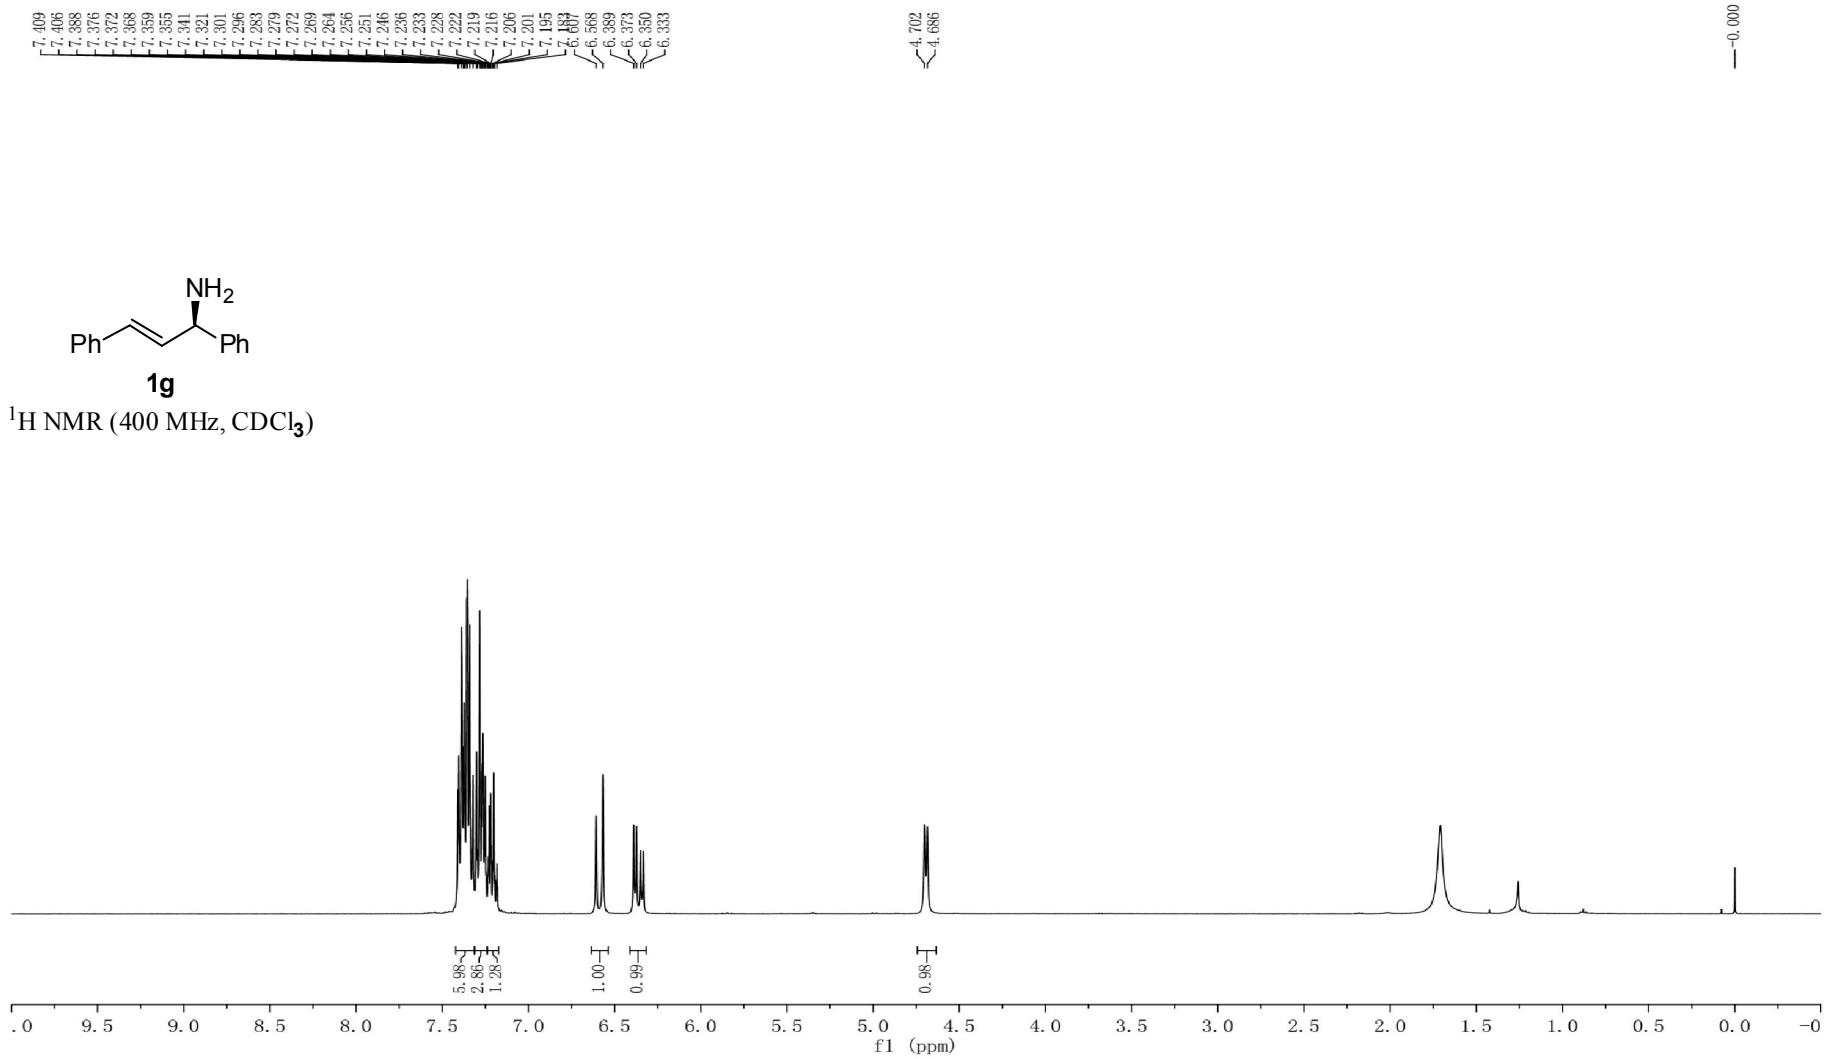

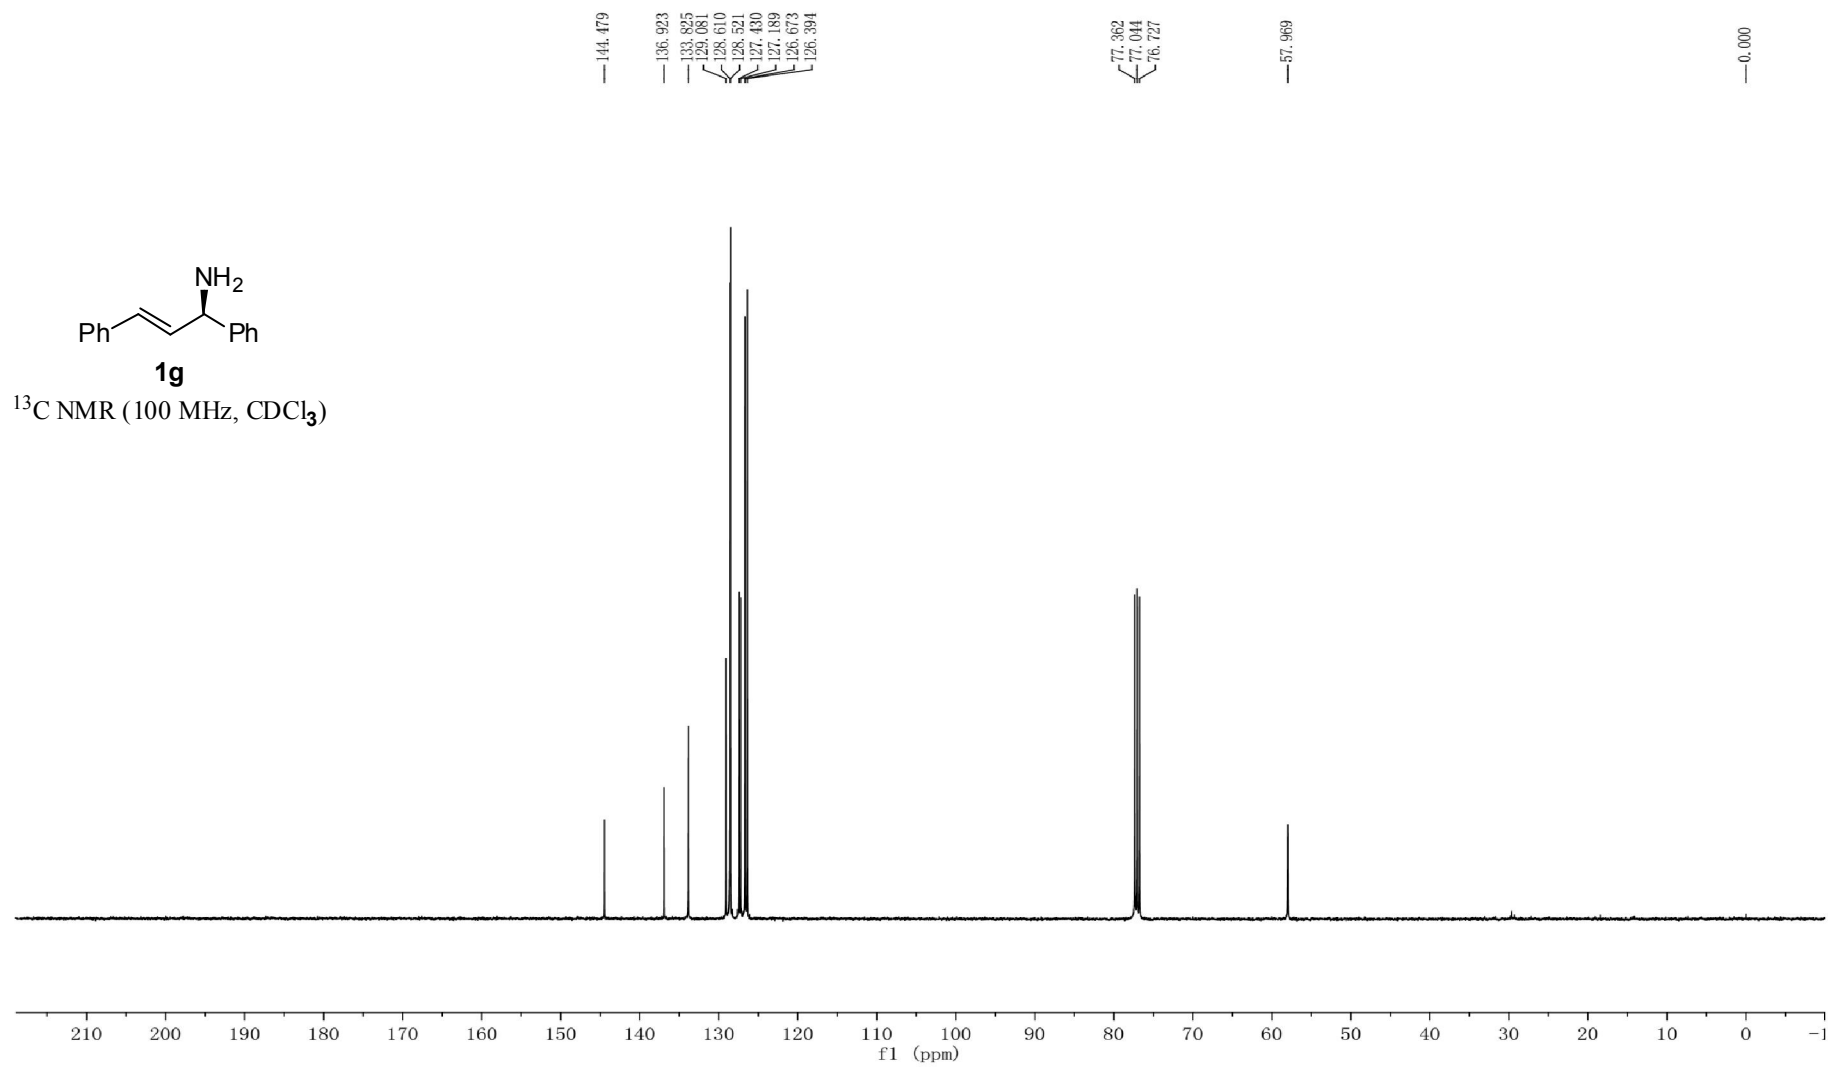

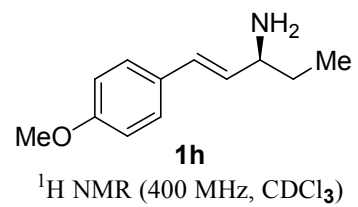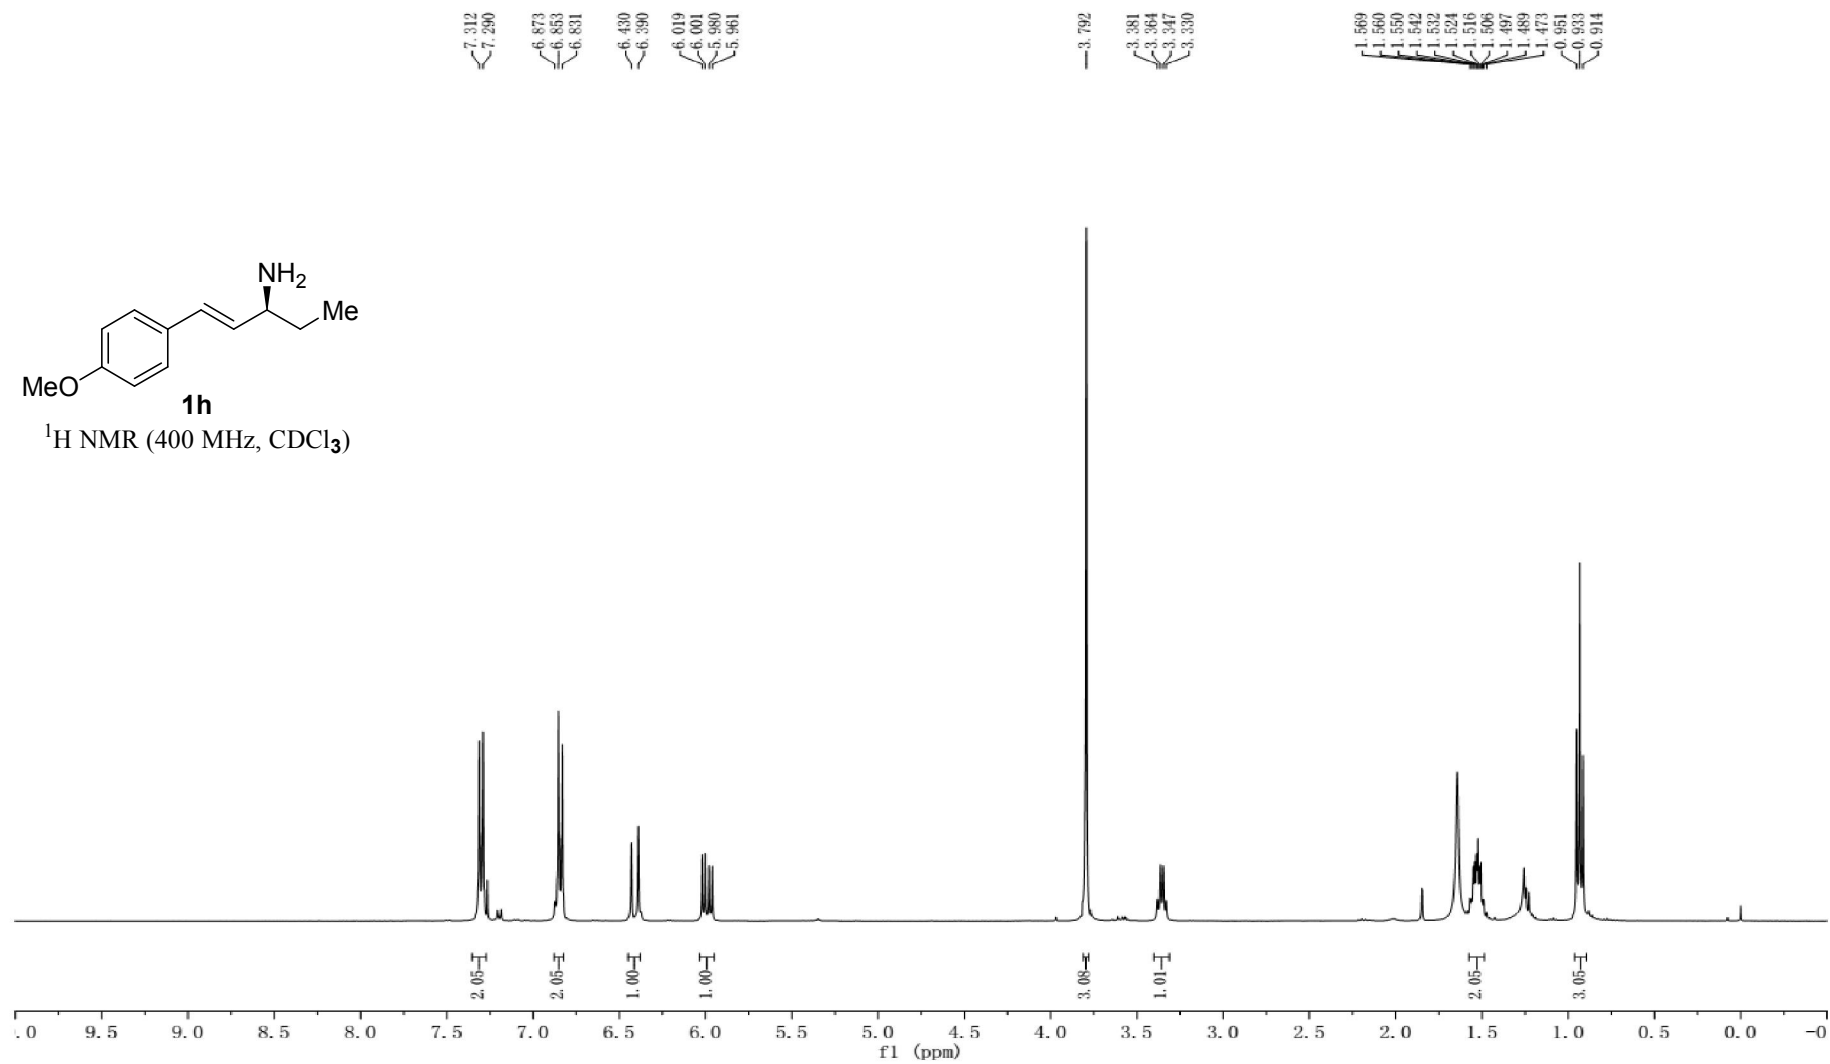

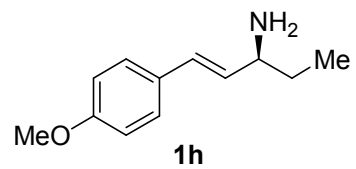

$^{13}\text{C}$  NMR (100 MHz,  $\text{CDCl}_3$ )

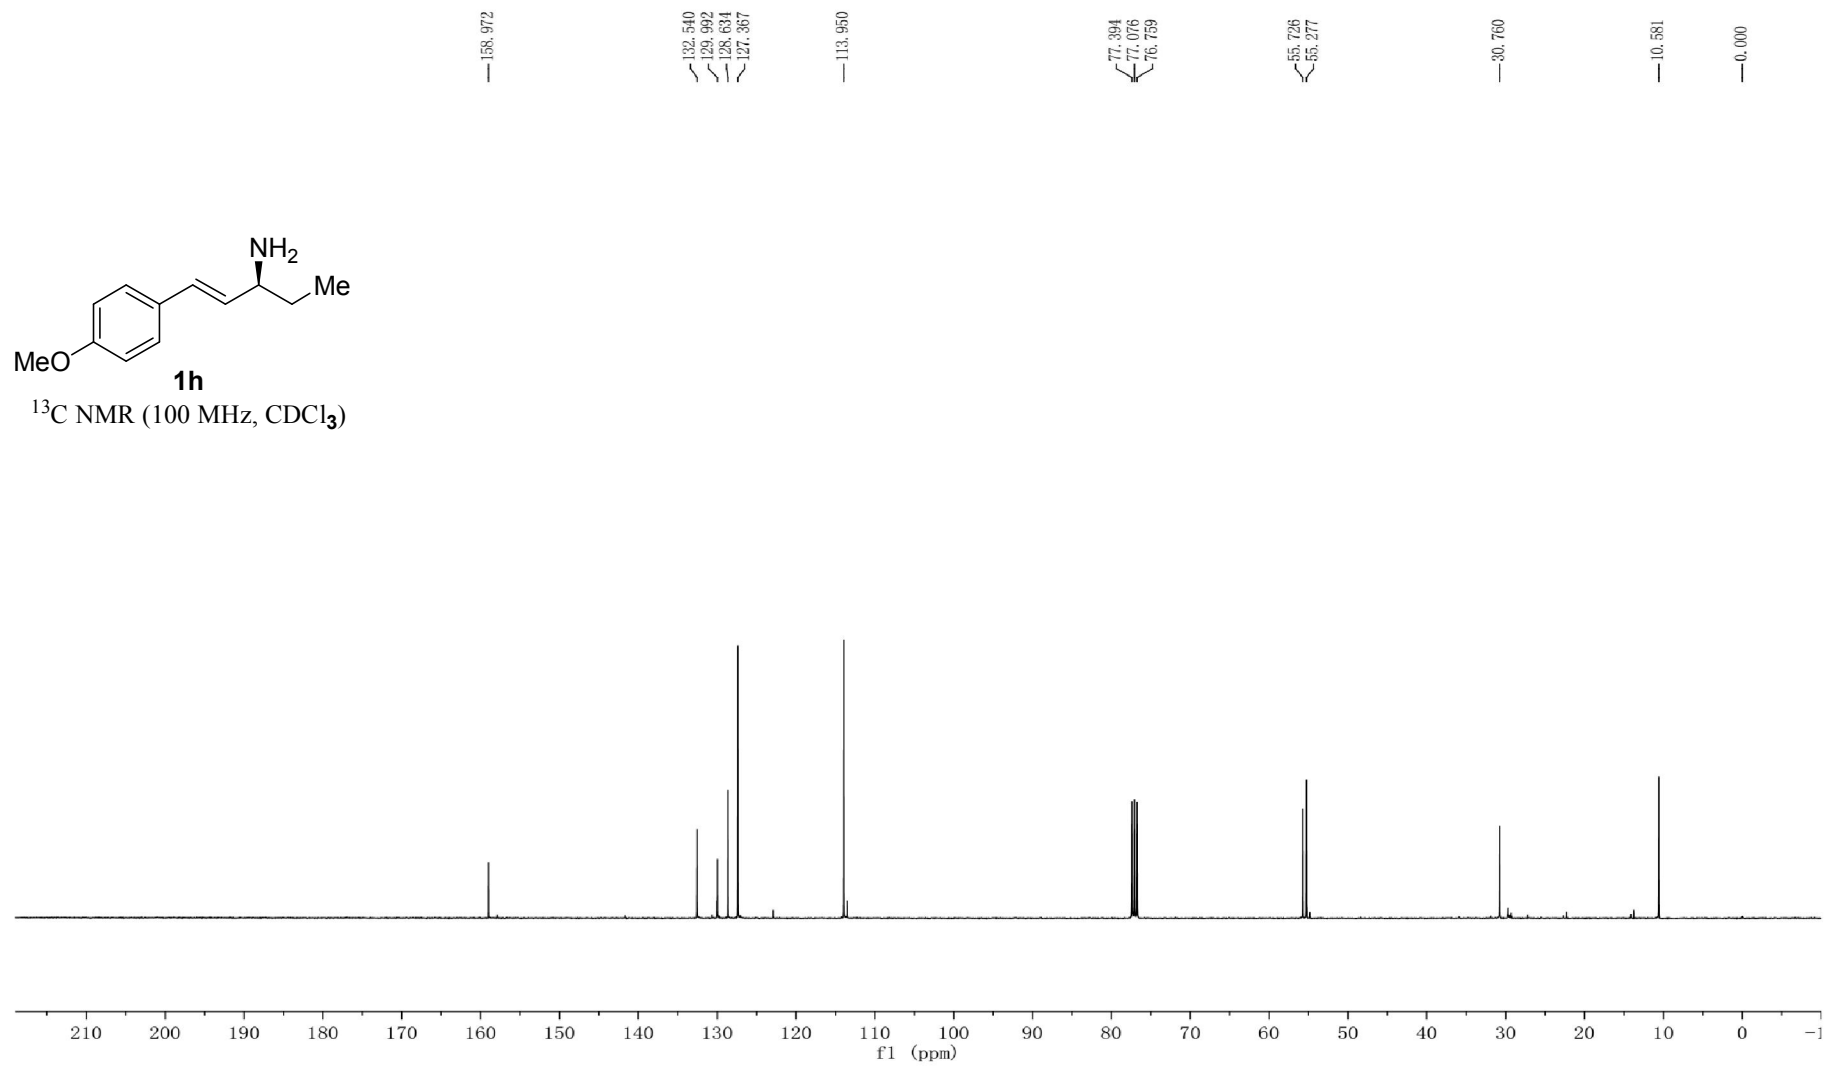

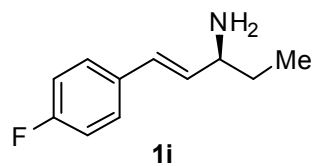

<sup>1</sup>H NMR (400 MHz, CDCl<sub>3</sub>)

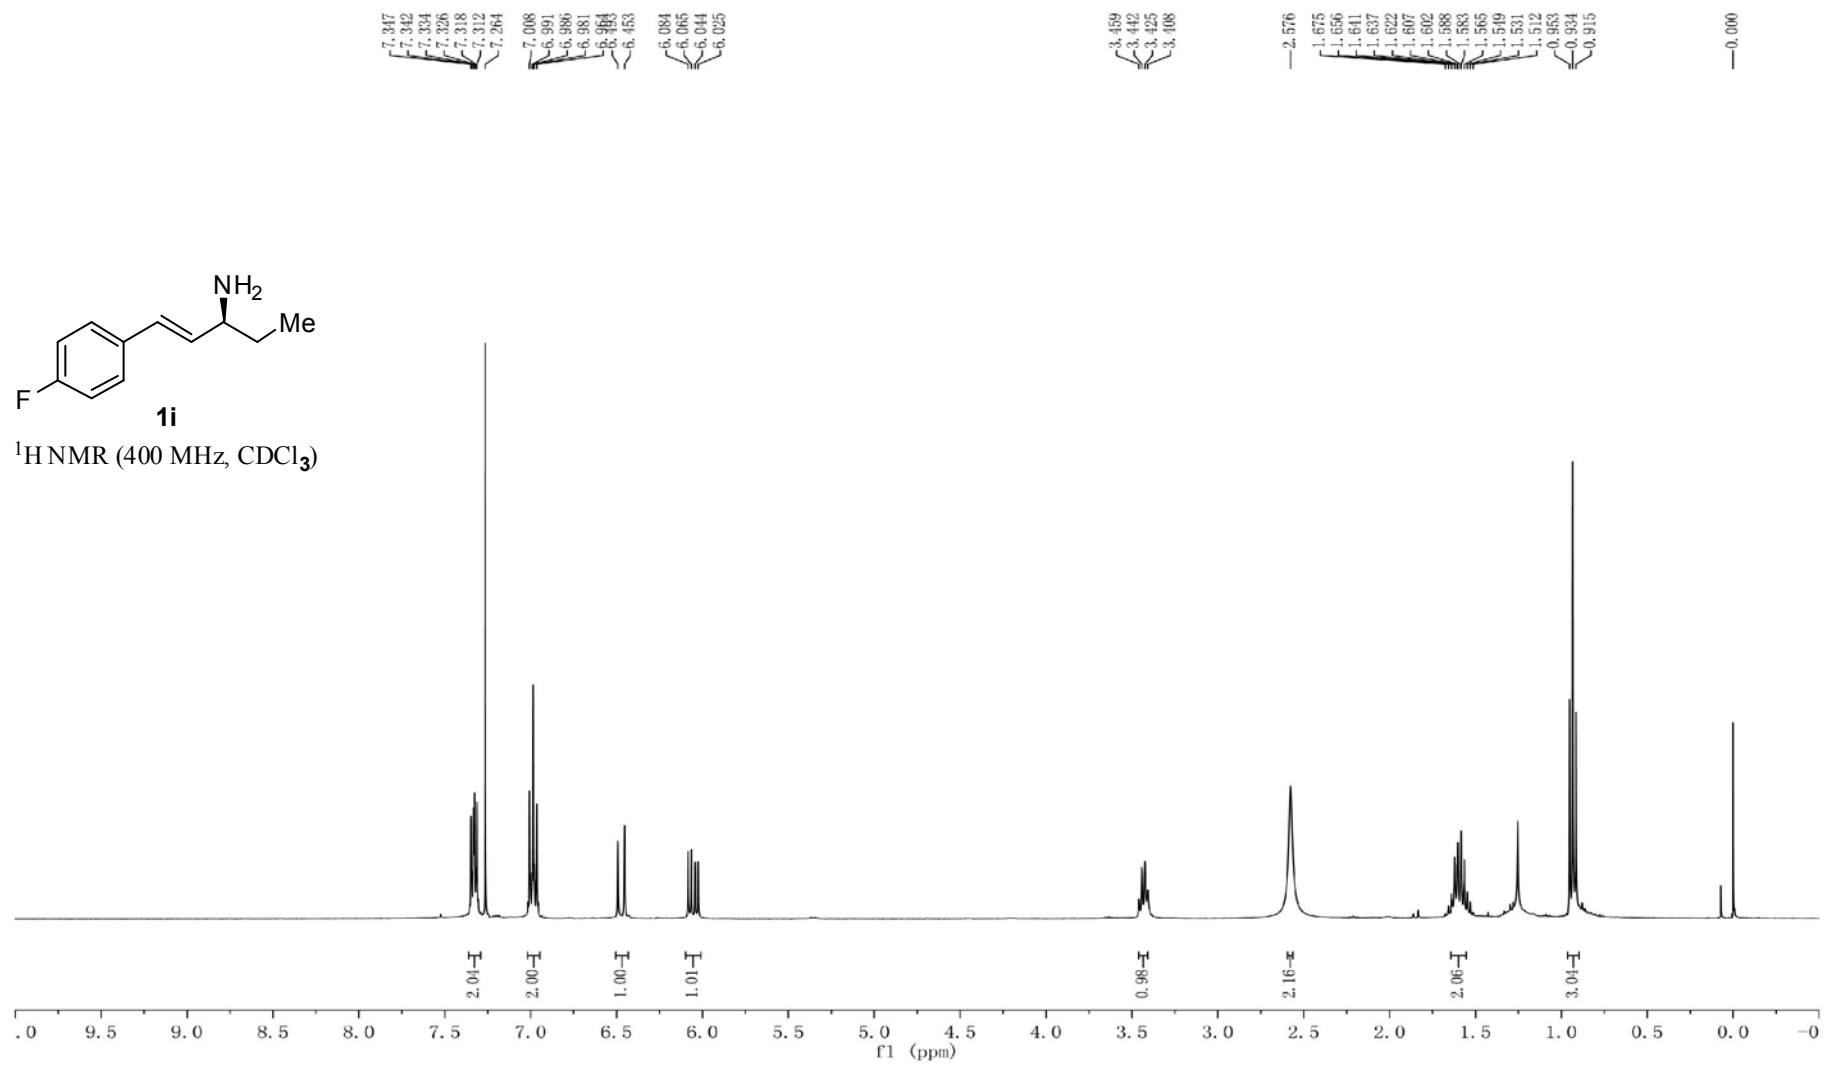

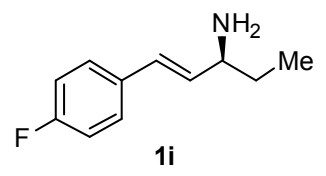

<sup>13</sup>C NMR (100 MHz, CDCl<sub>3</sub>)

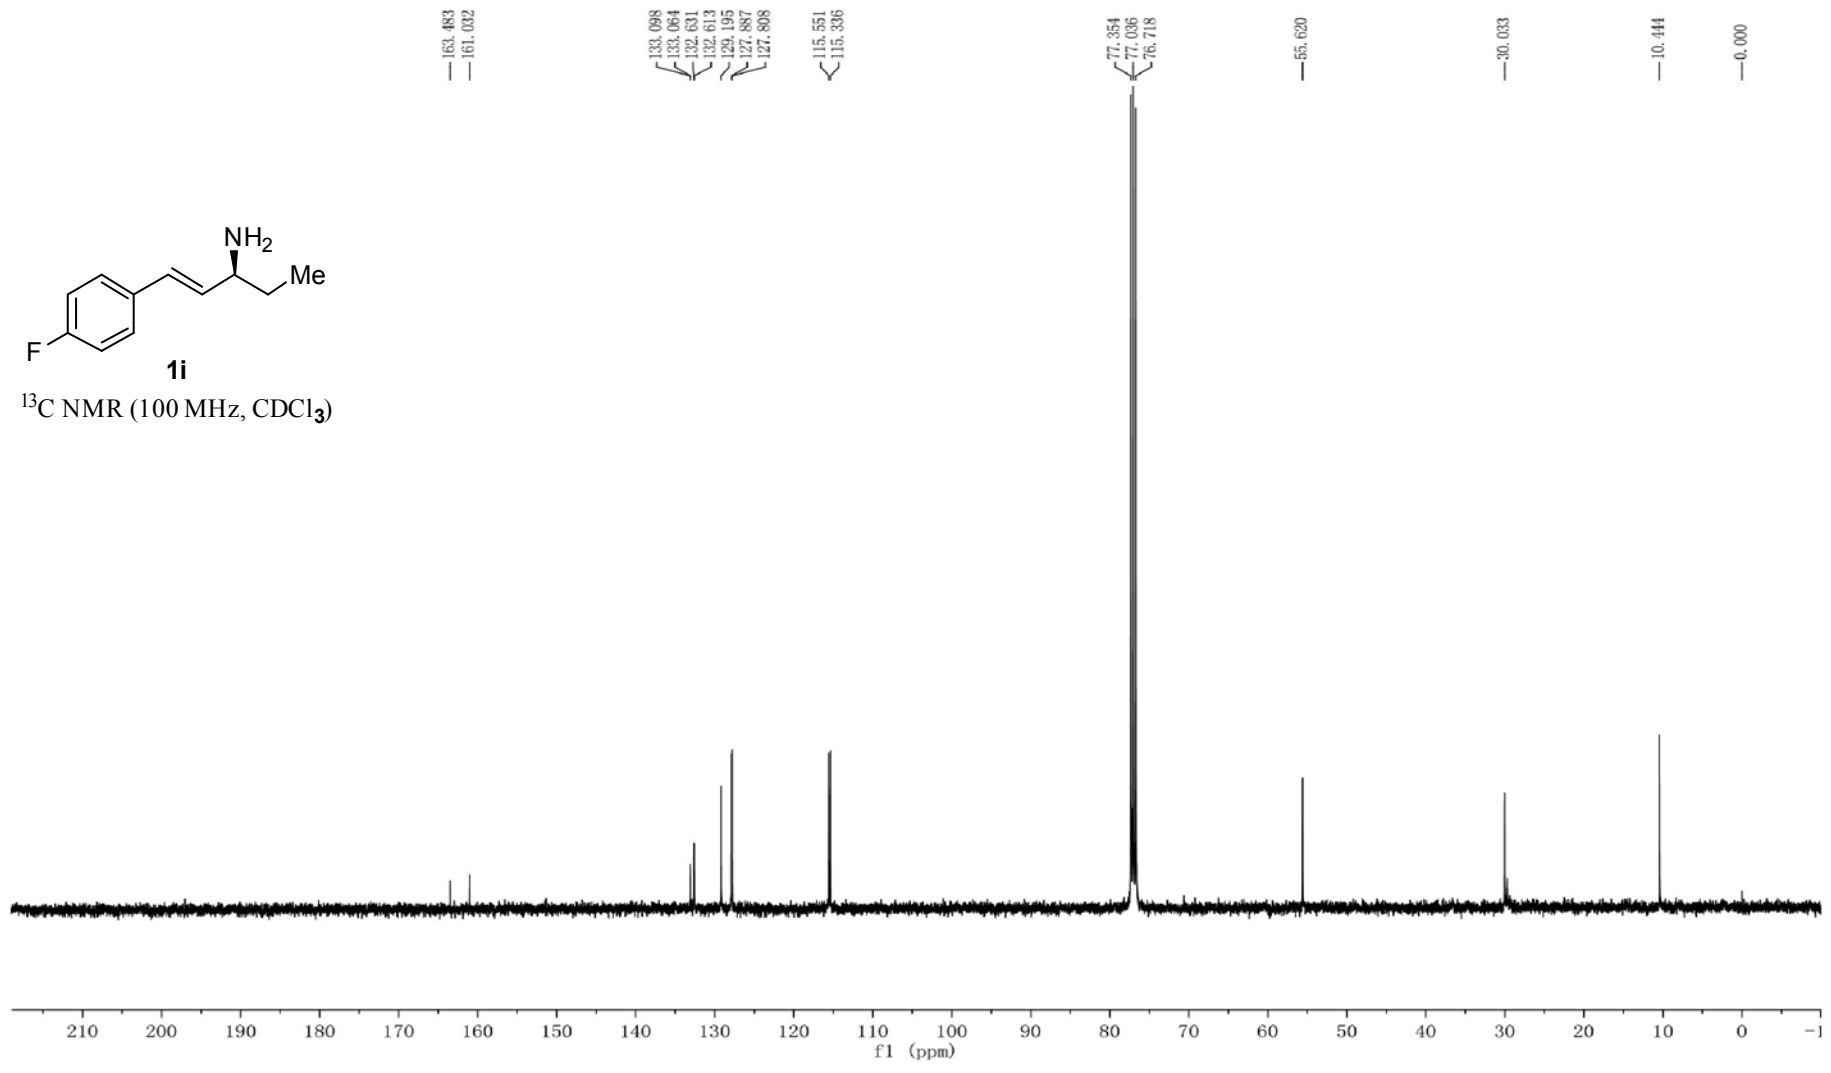

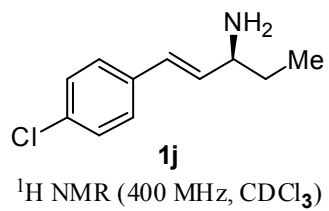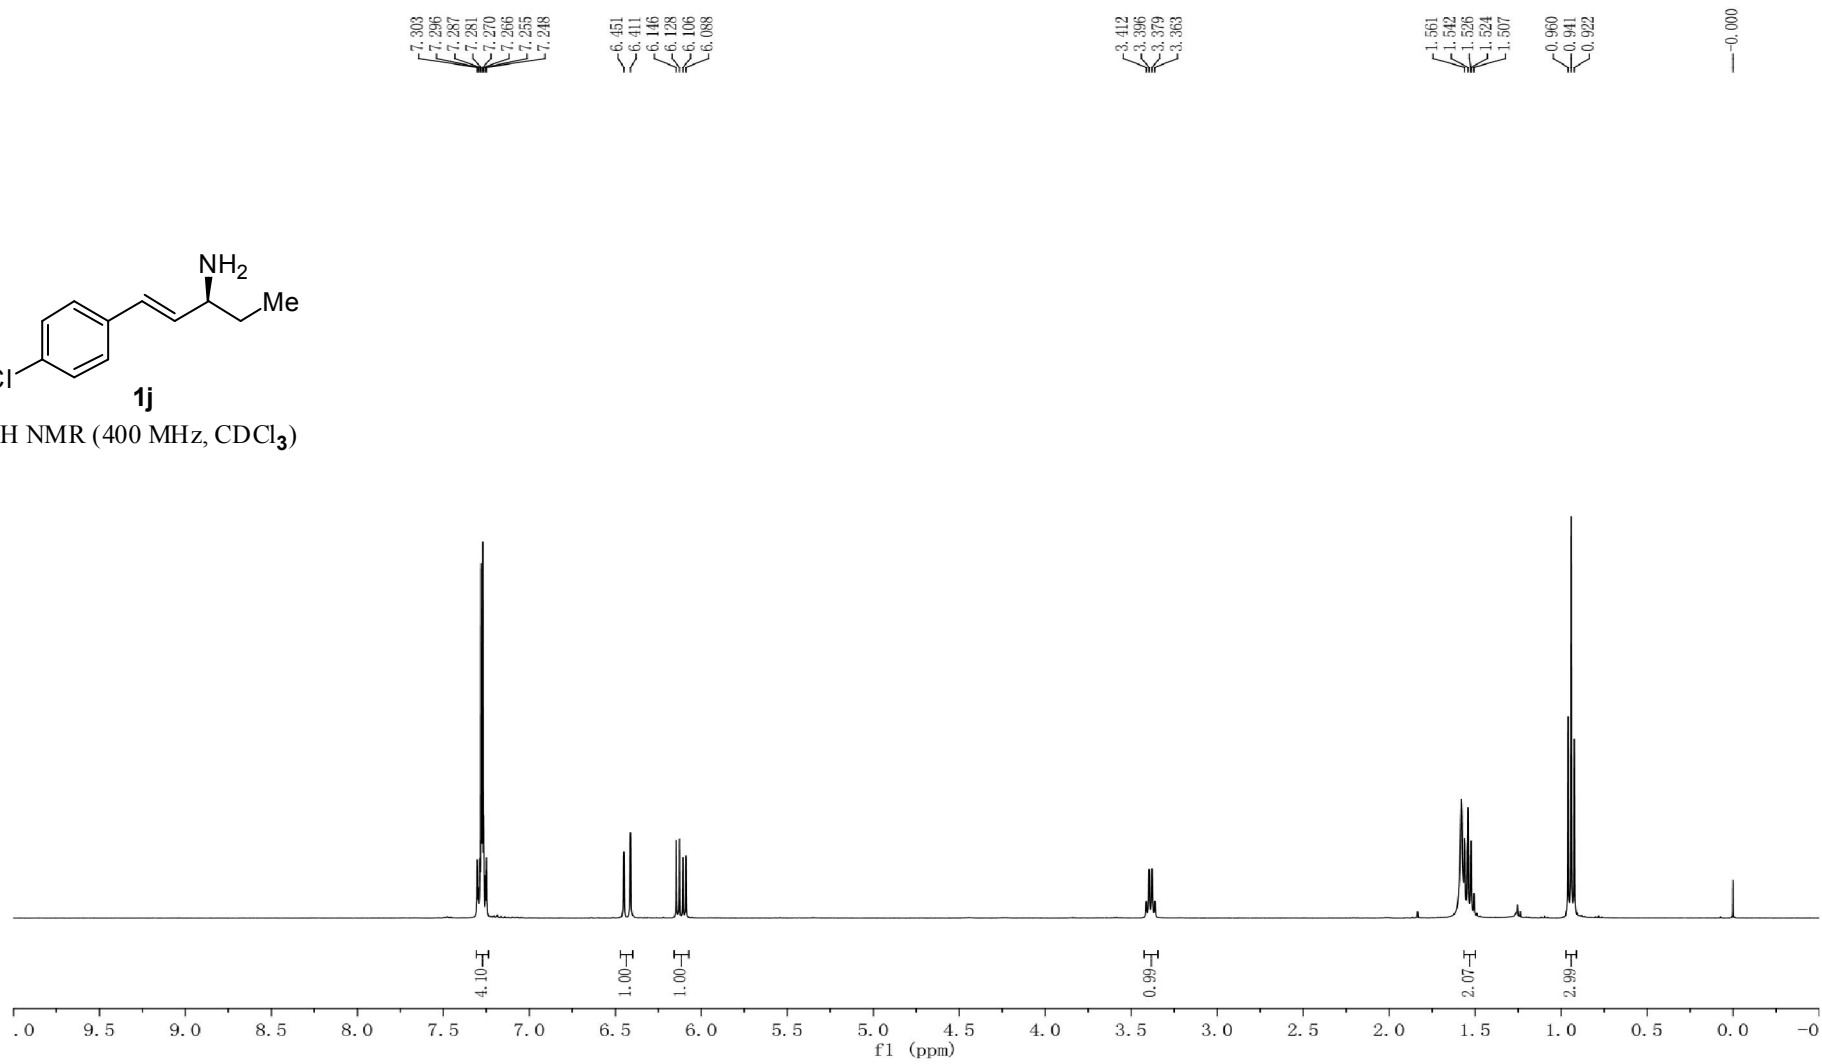

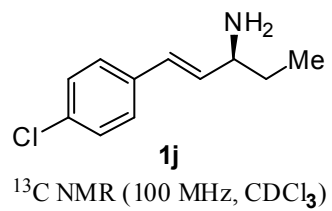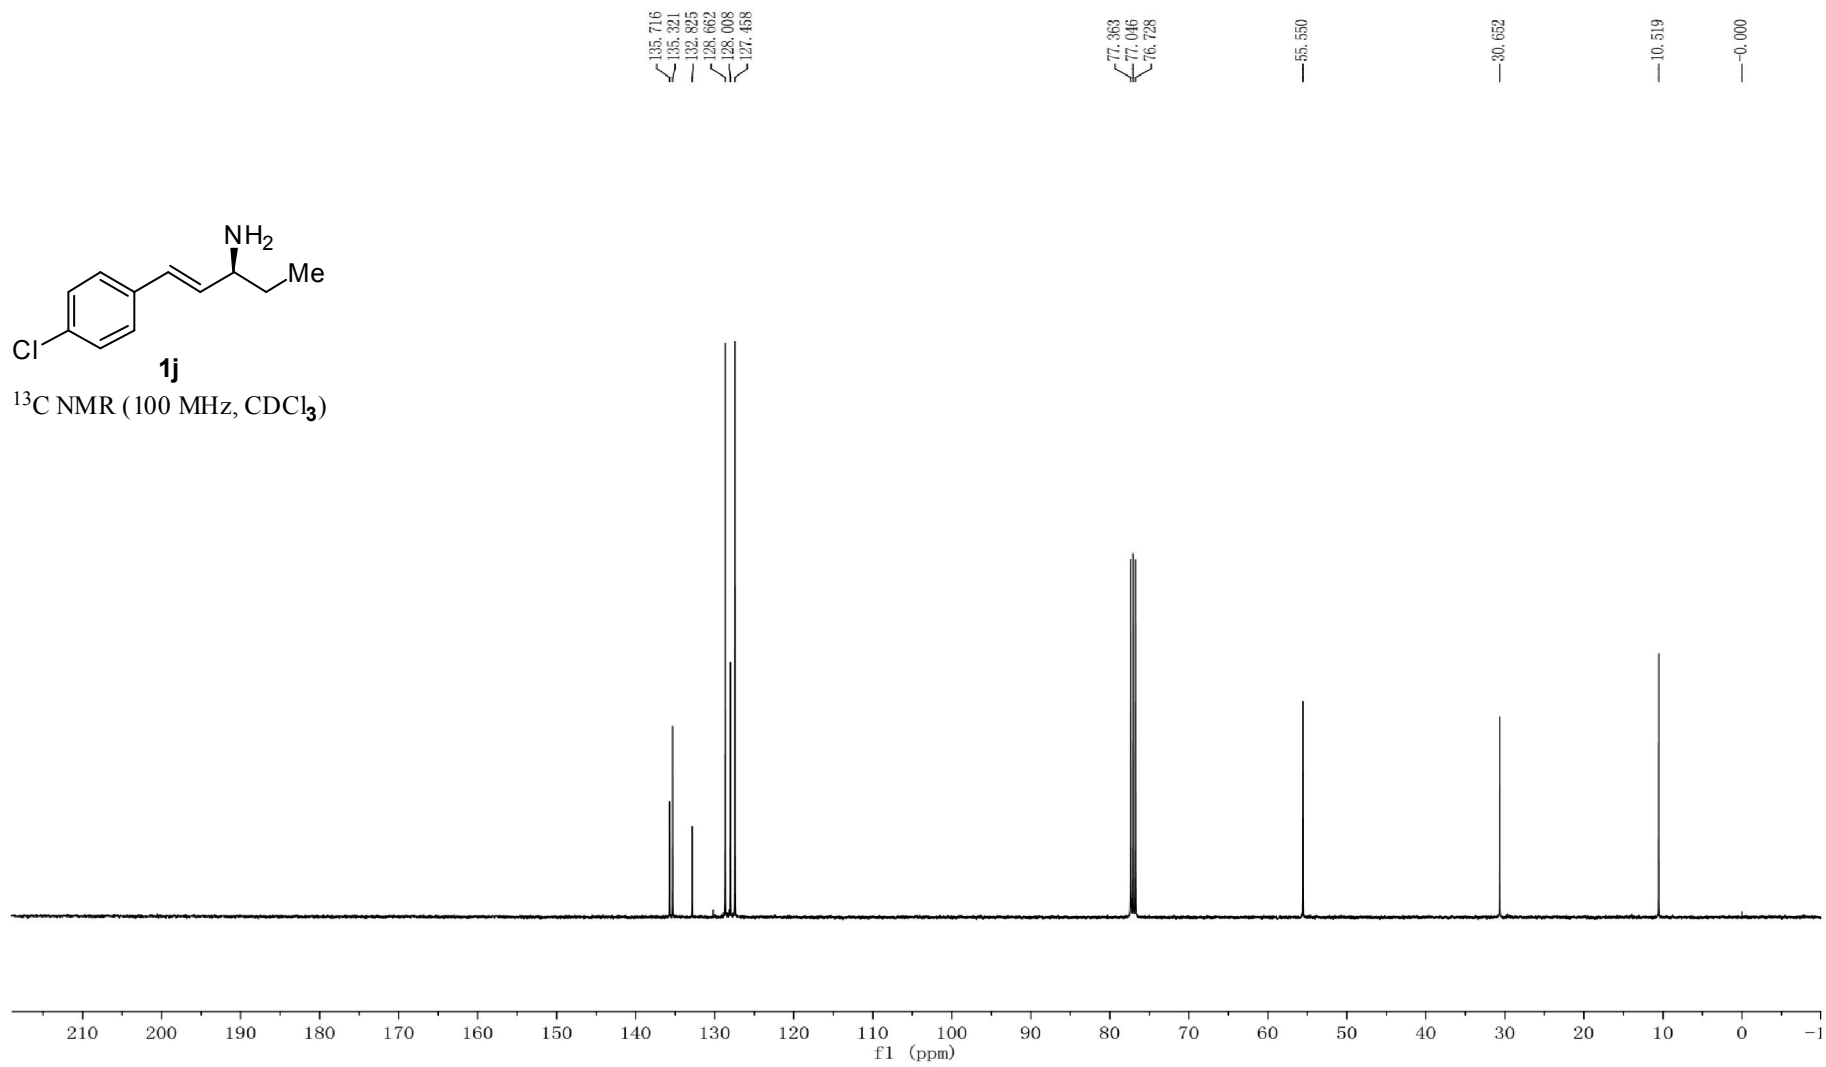



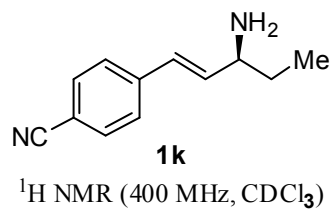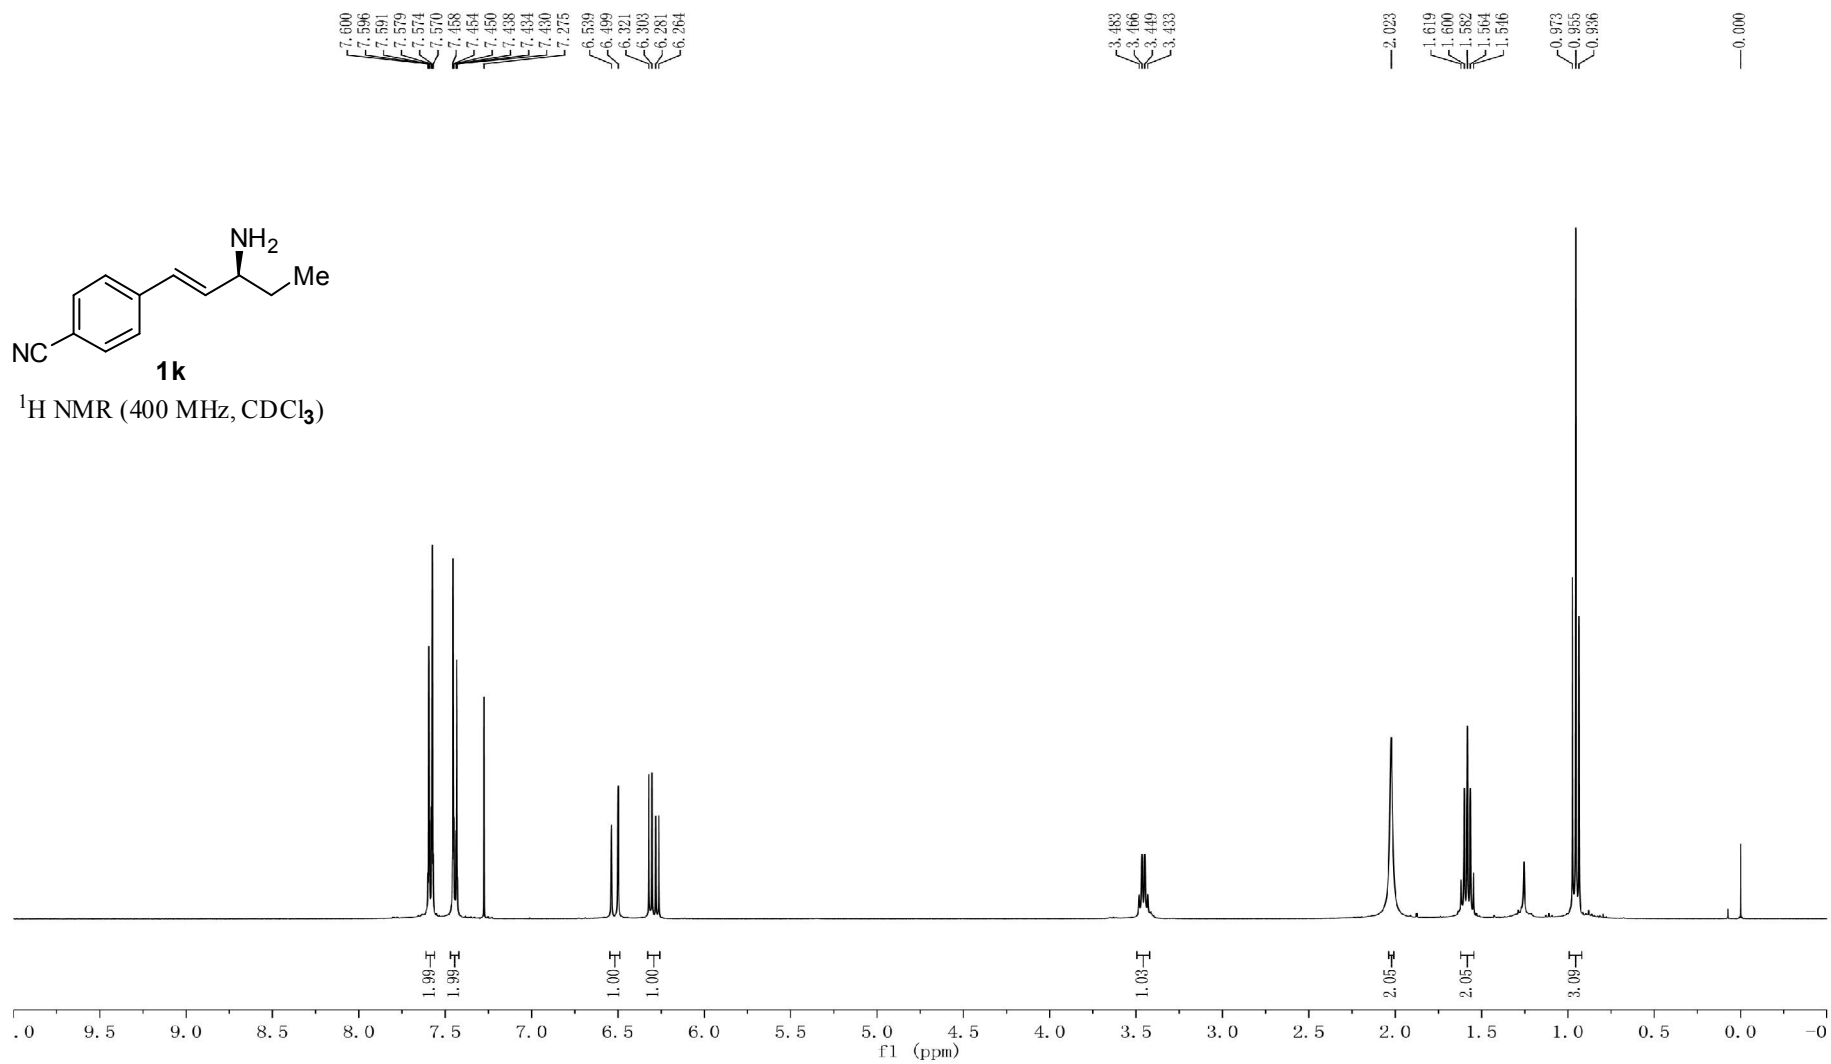

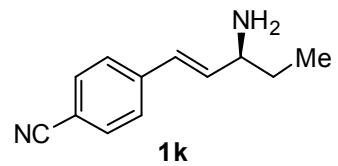

$^{13}\text{C}$ NMR (100 MHz,  $\text{CDCl}_3$ )

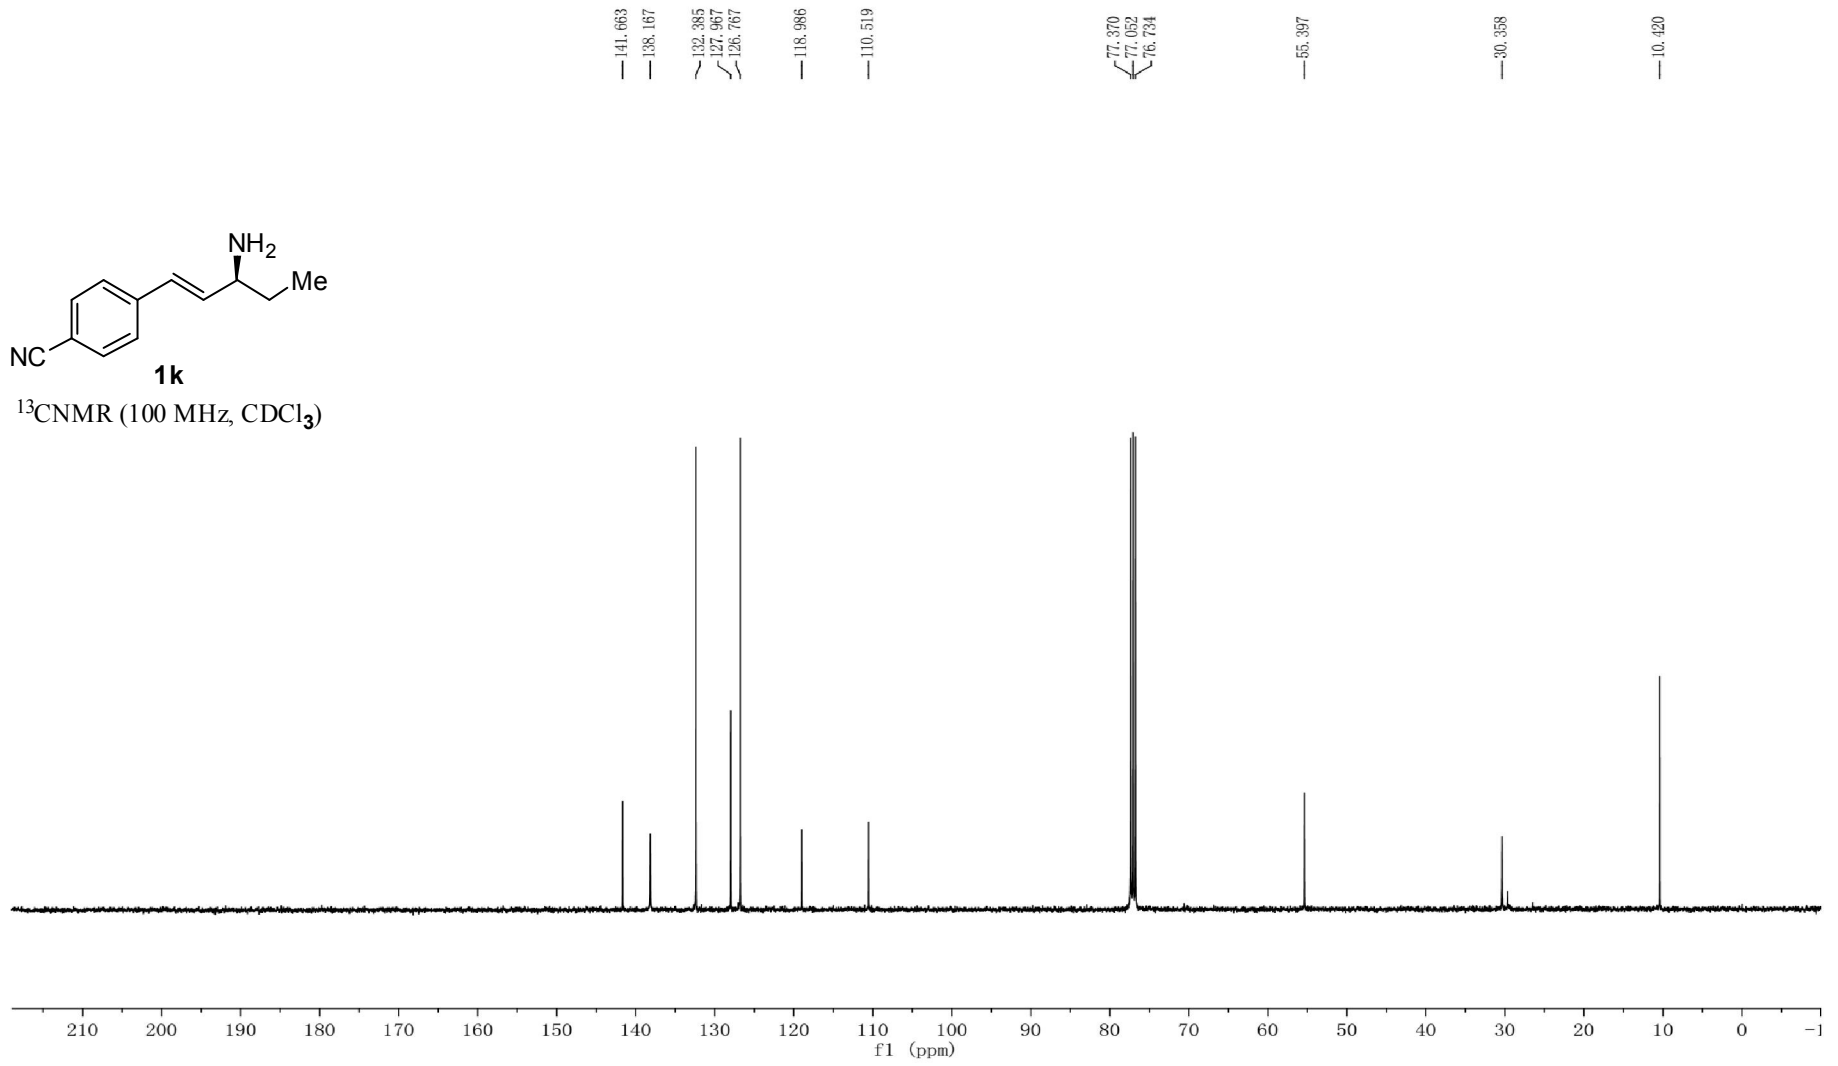

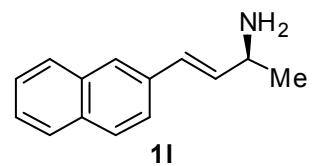

<sup>1</sup>H NMR (400 MHz, CDCl<sub>3</sub>)

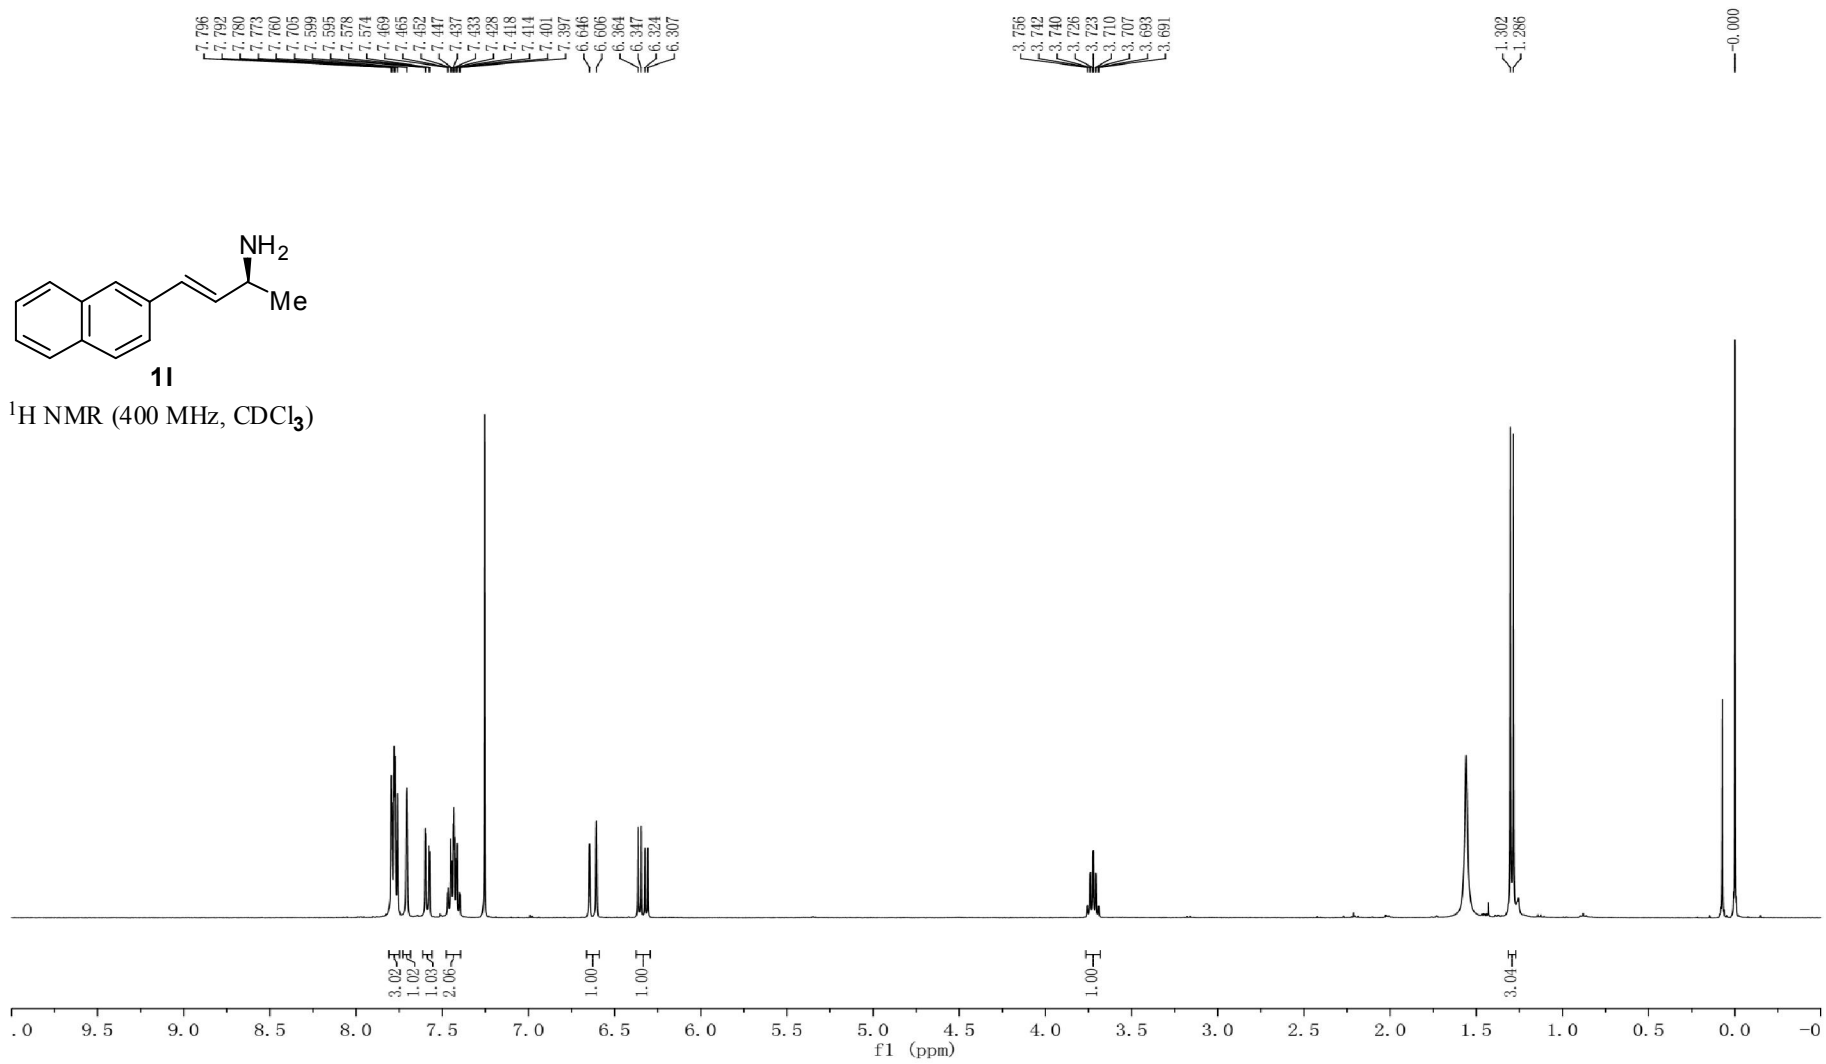

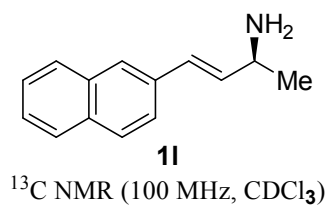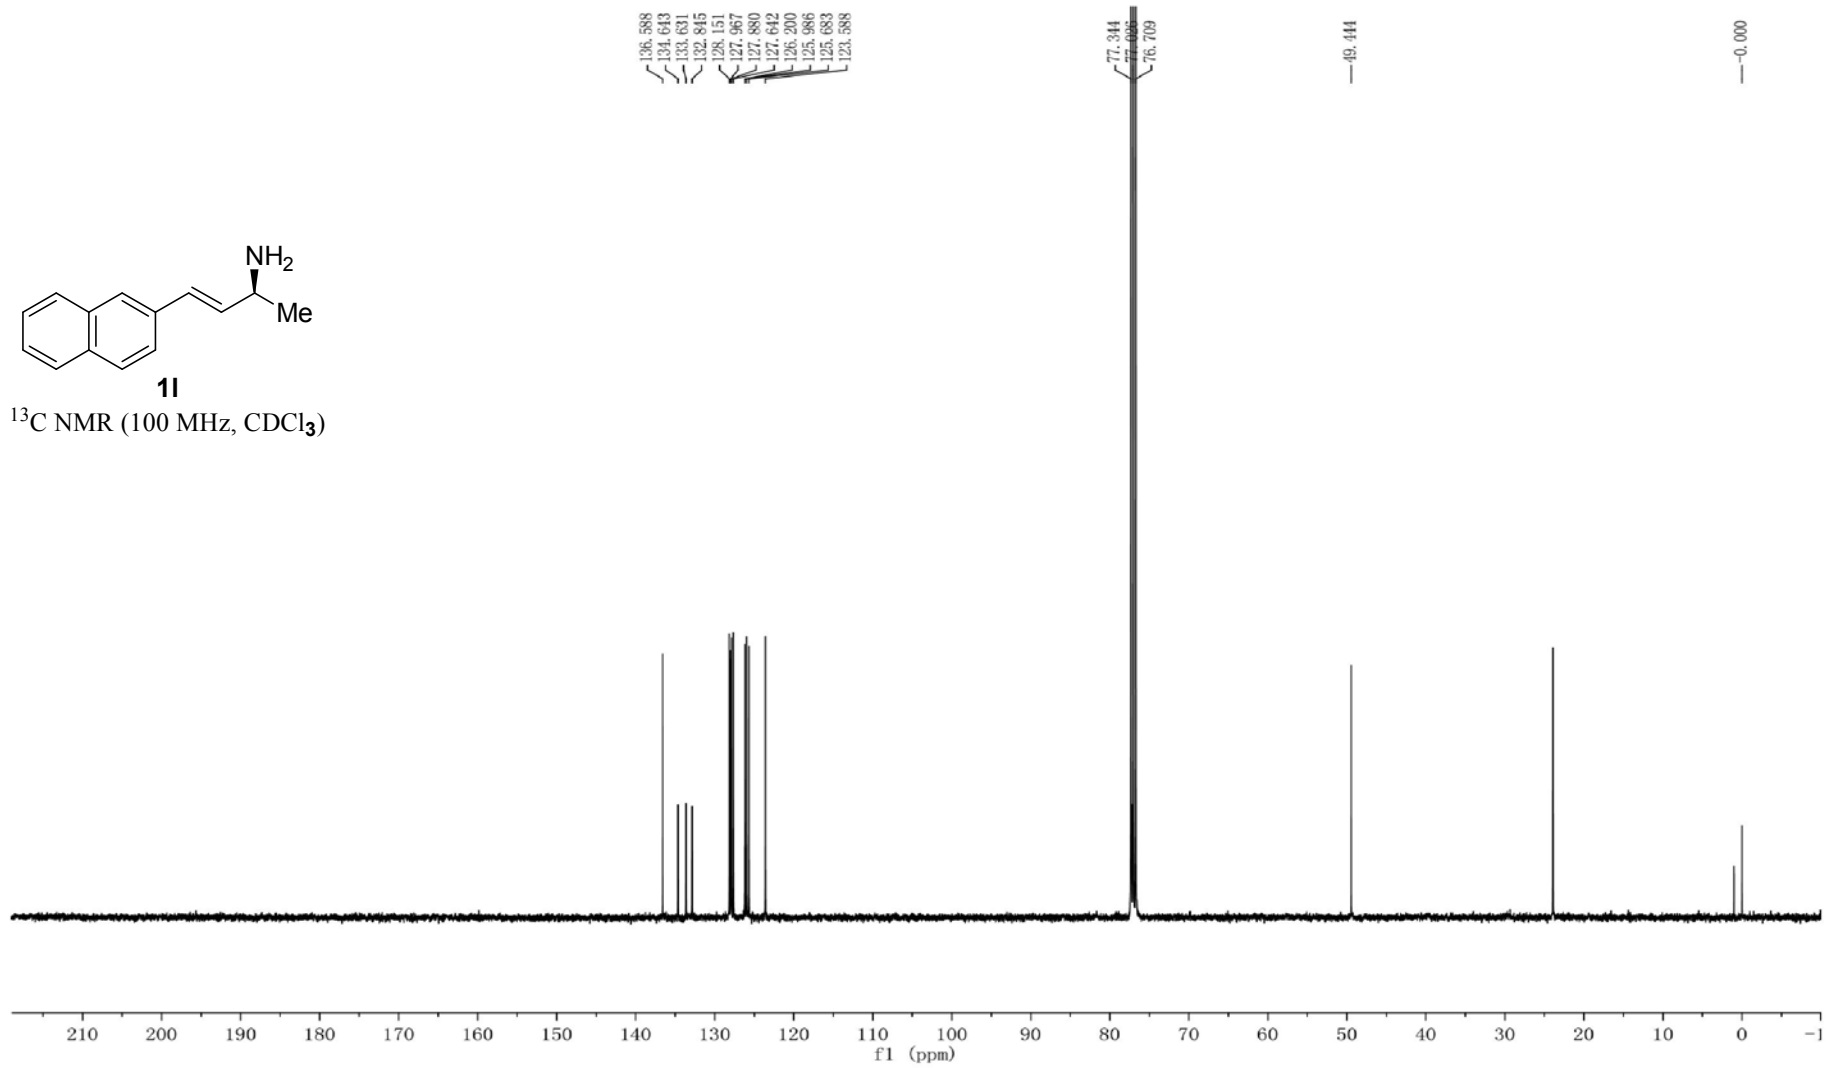

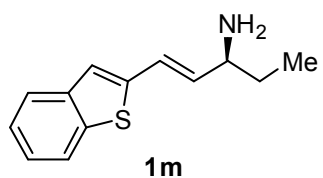

<sup>1</sup>H NMR (400 MHz, CDCl<sub>3</sub>)

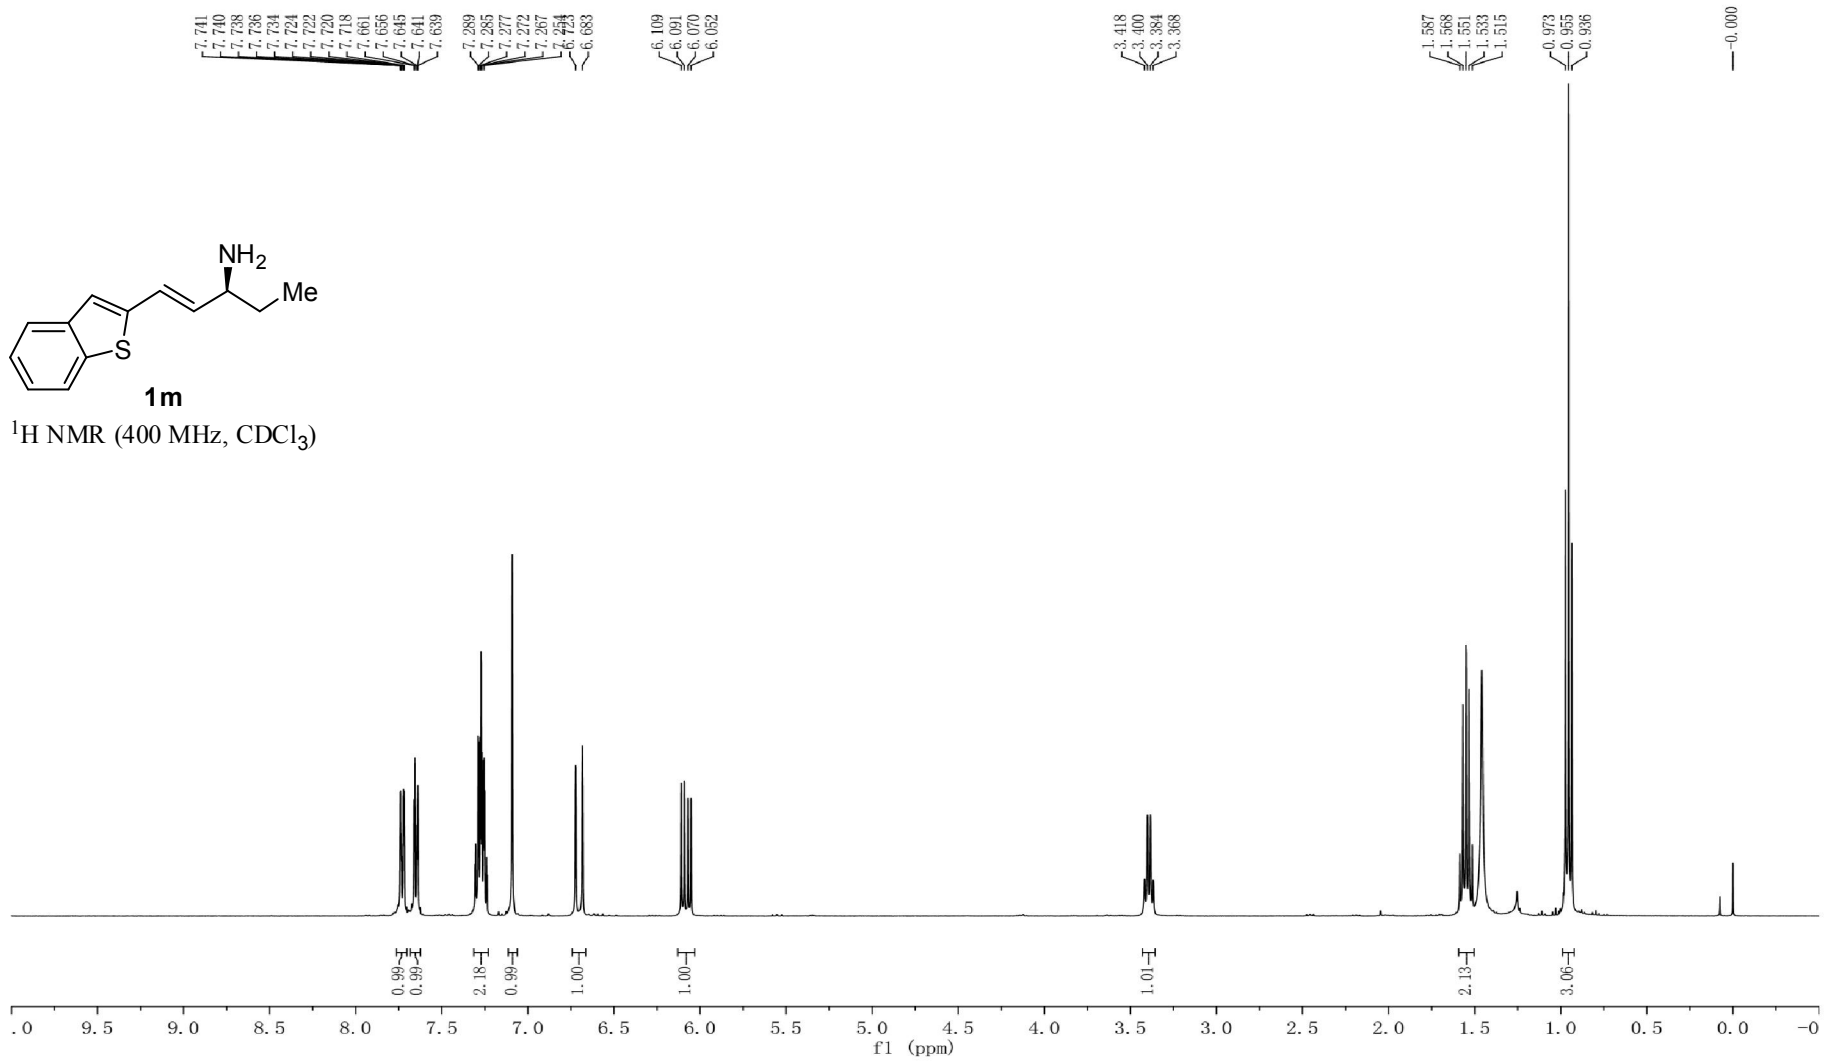

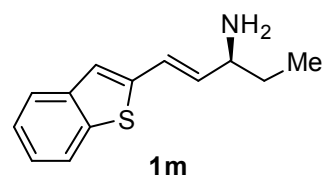

$^{13}\text{C}$  NMR (100 MHz,  $\text{CDCl}_3$ )

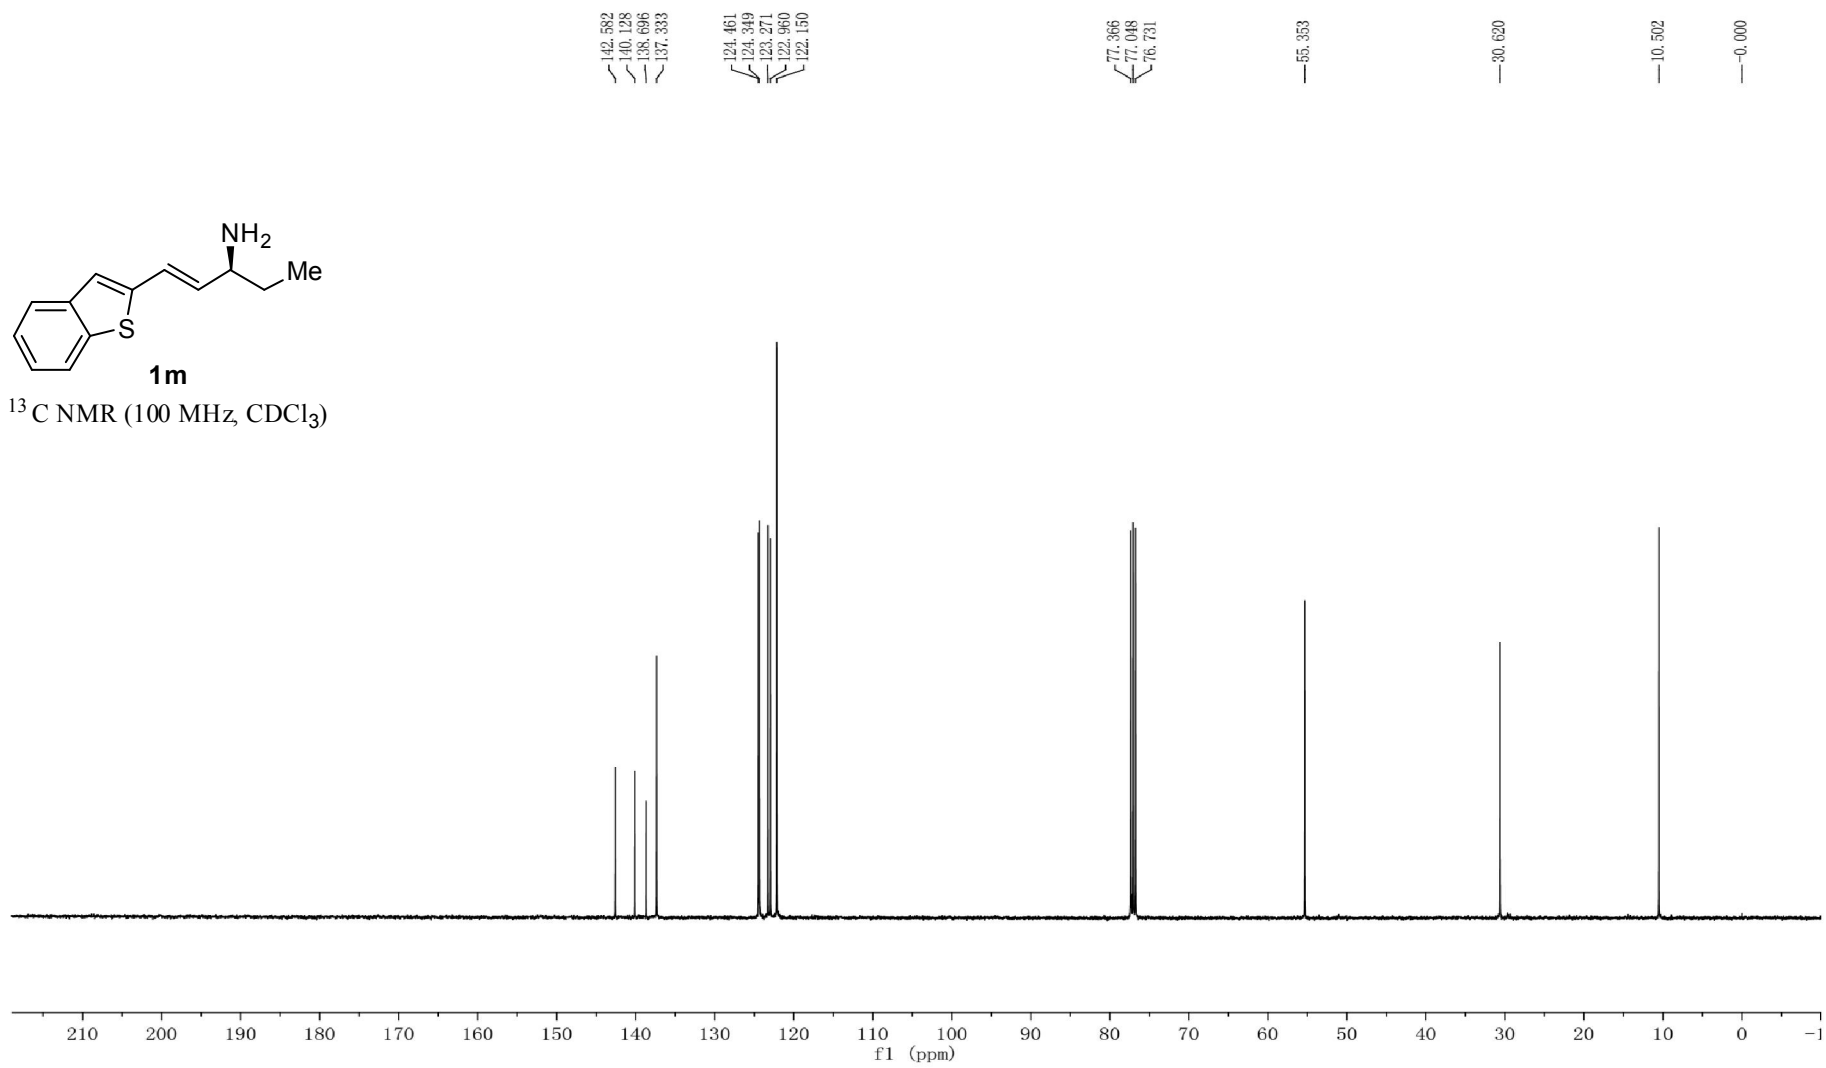

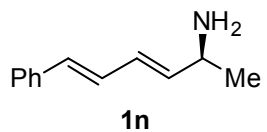

<sup>1</sup>H NMR (400 MHz, CDCl<sub>3</sub>)

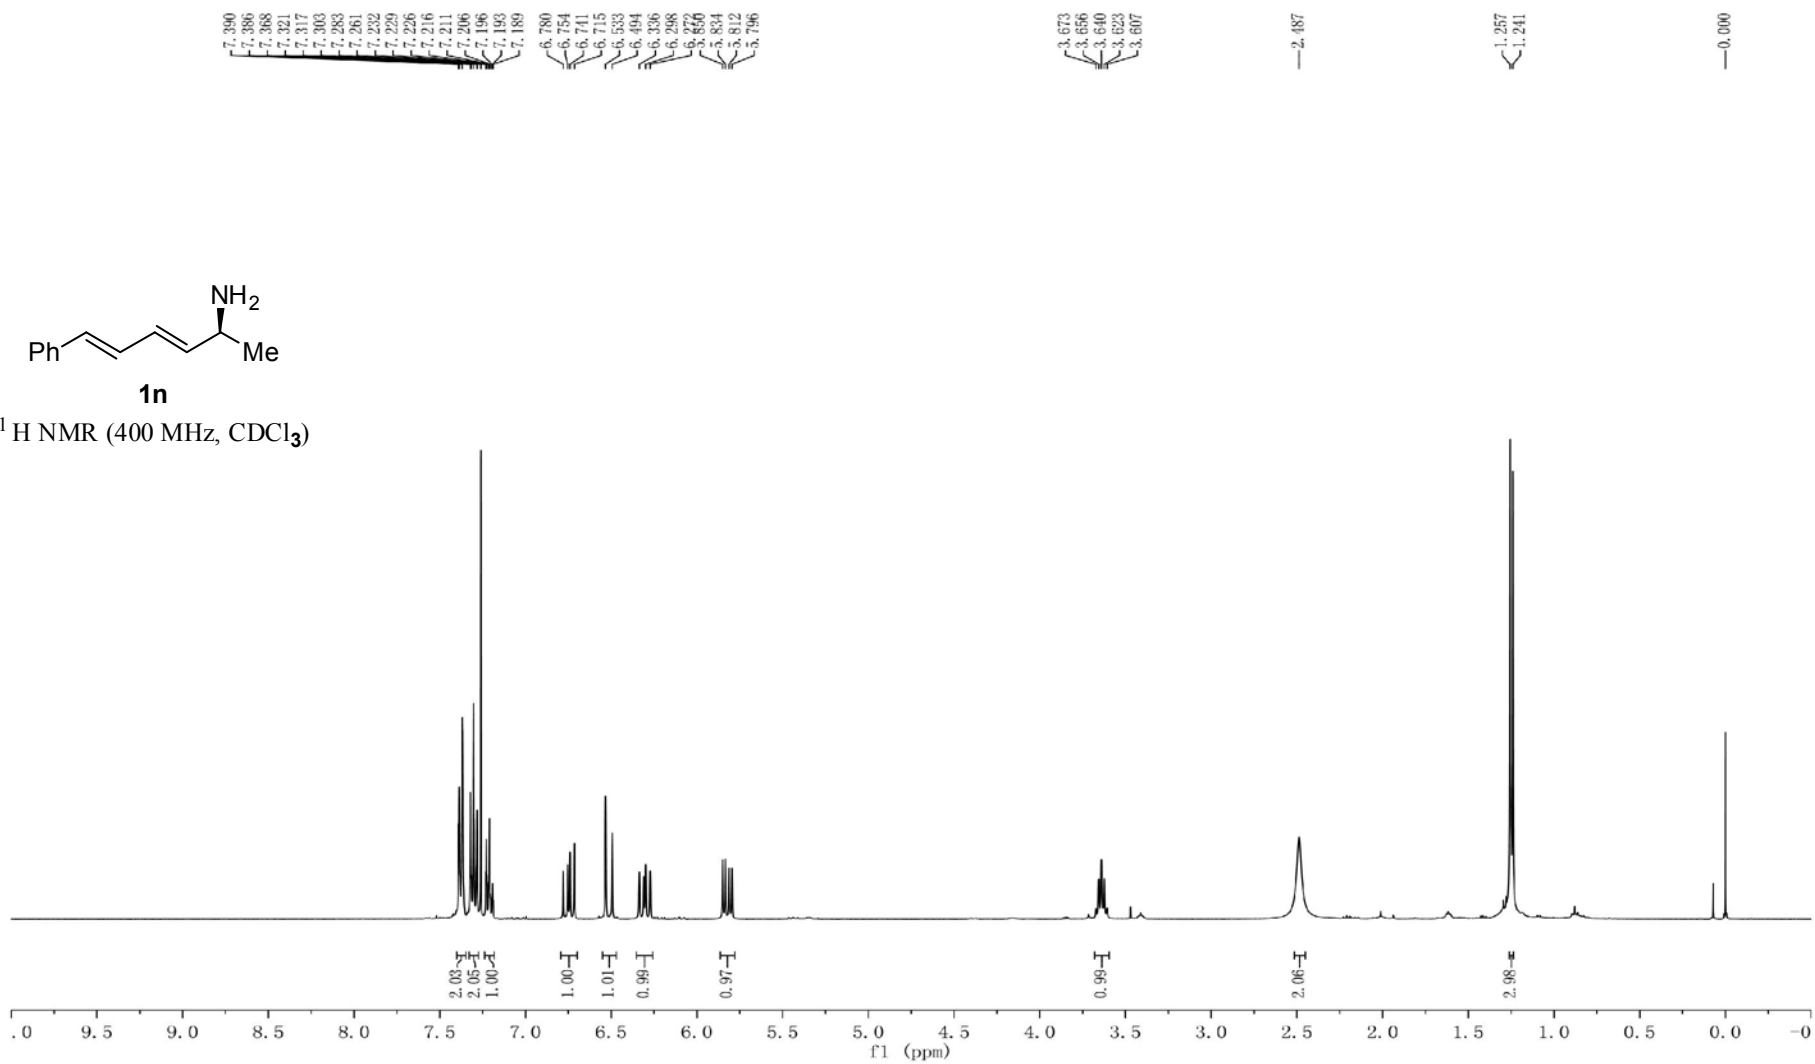

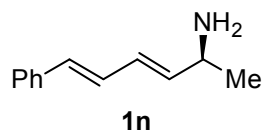

<sup>13</sup>C NMR (100 MHz, CDCl<sub>3</sub>)

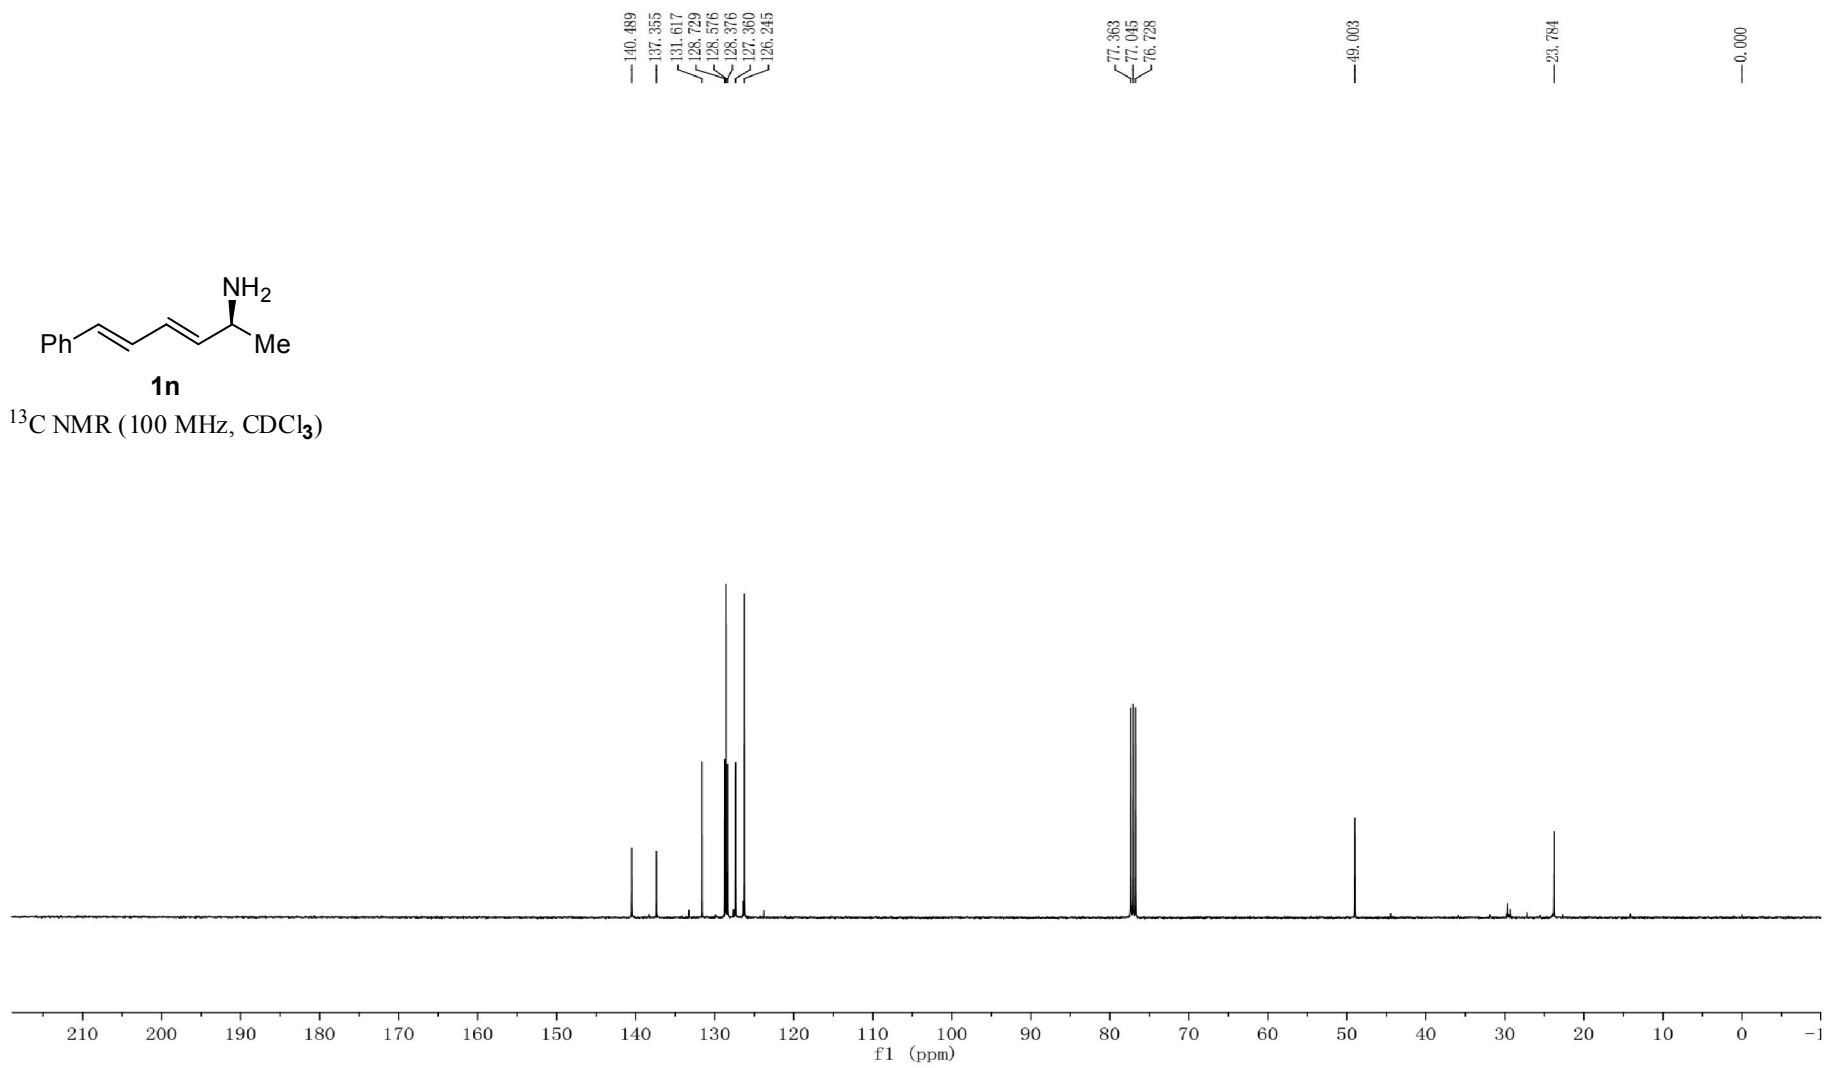



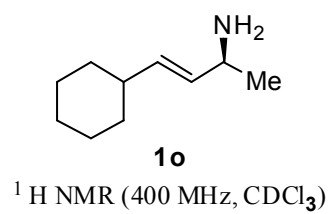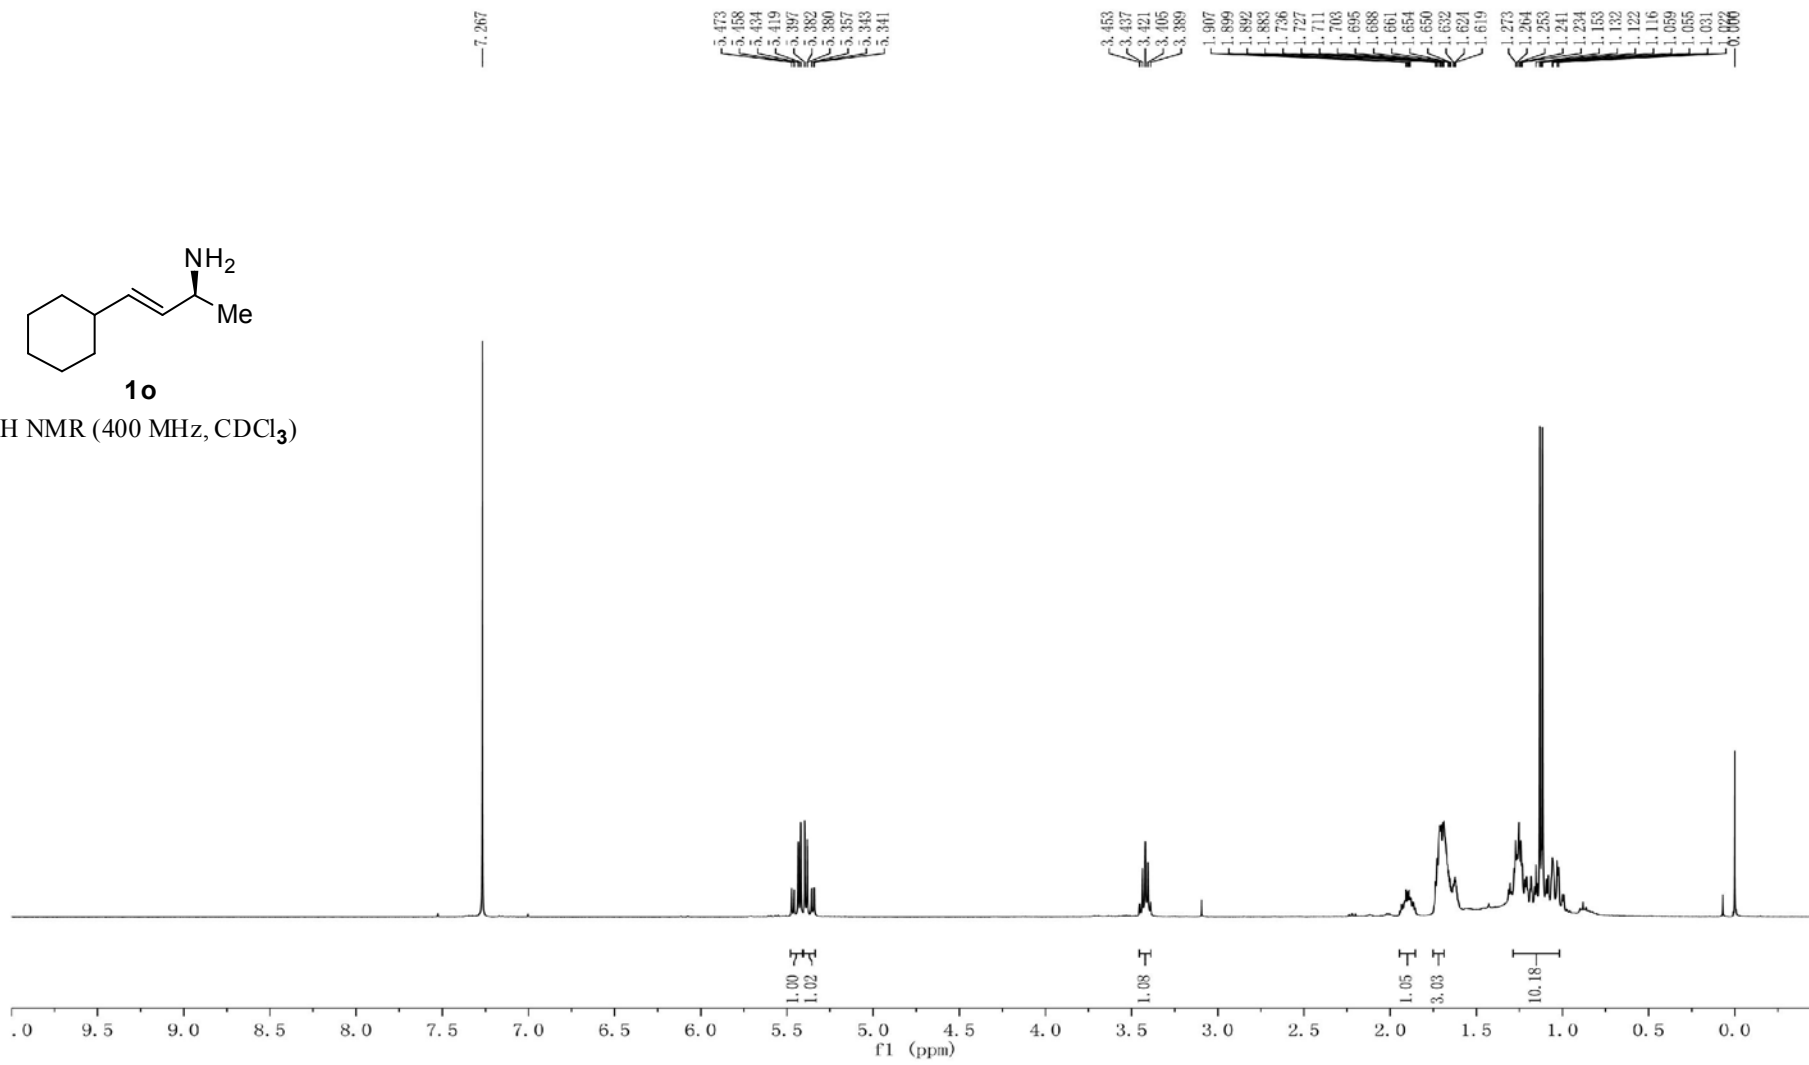

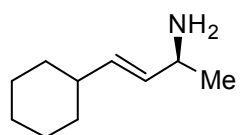

**1o**

$^{13}\text{C}$  NMR (100 MHz,  $\text{CDCl}_3$ )

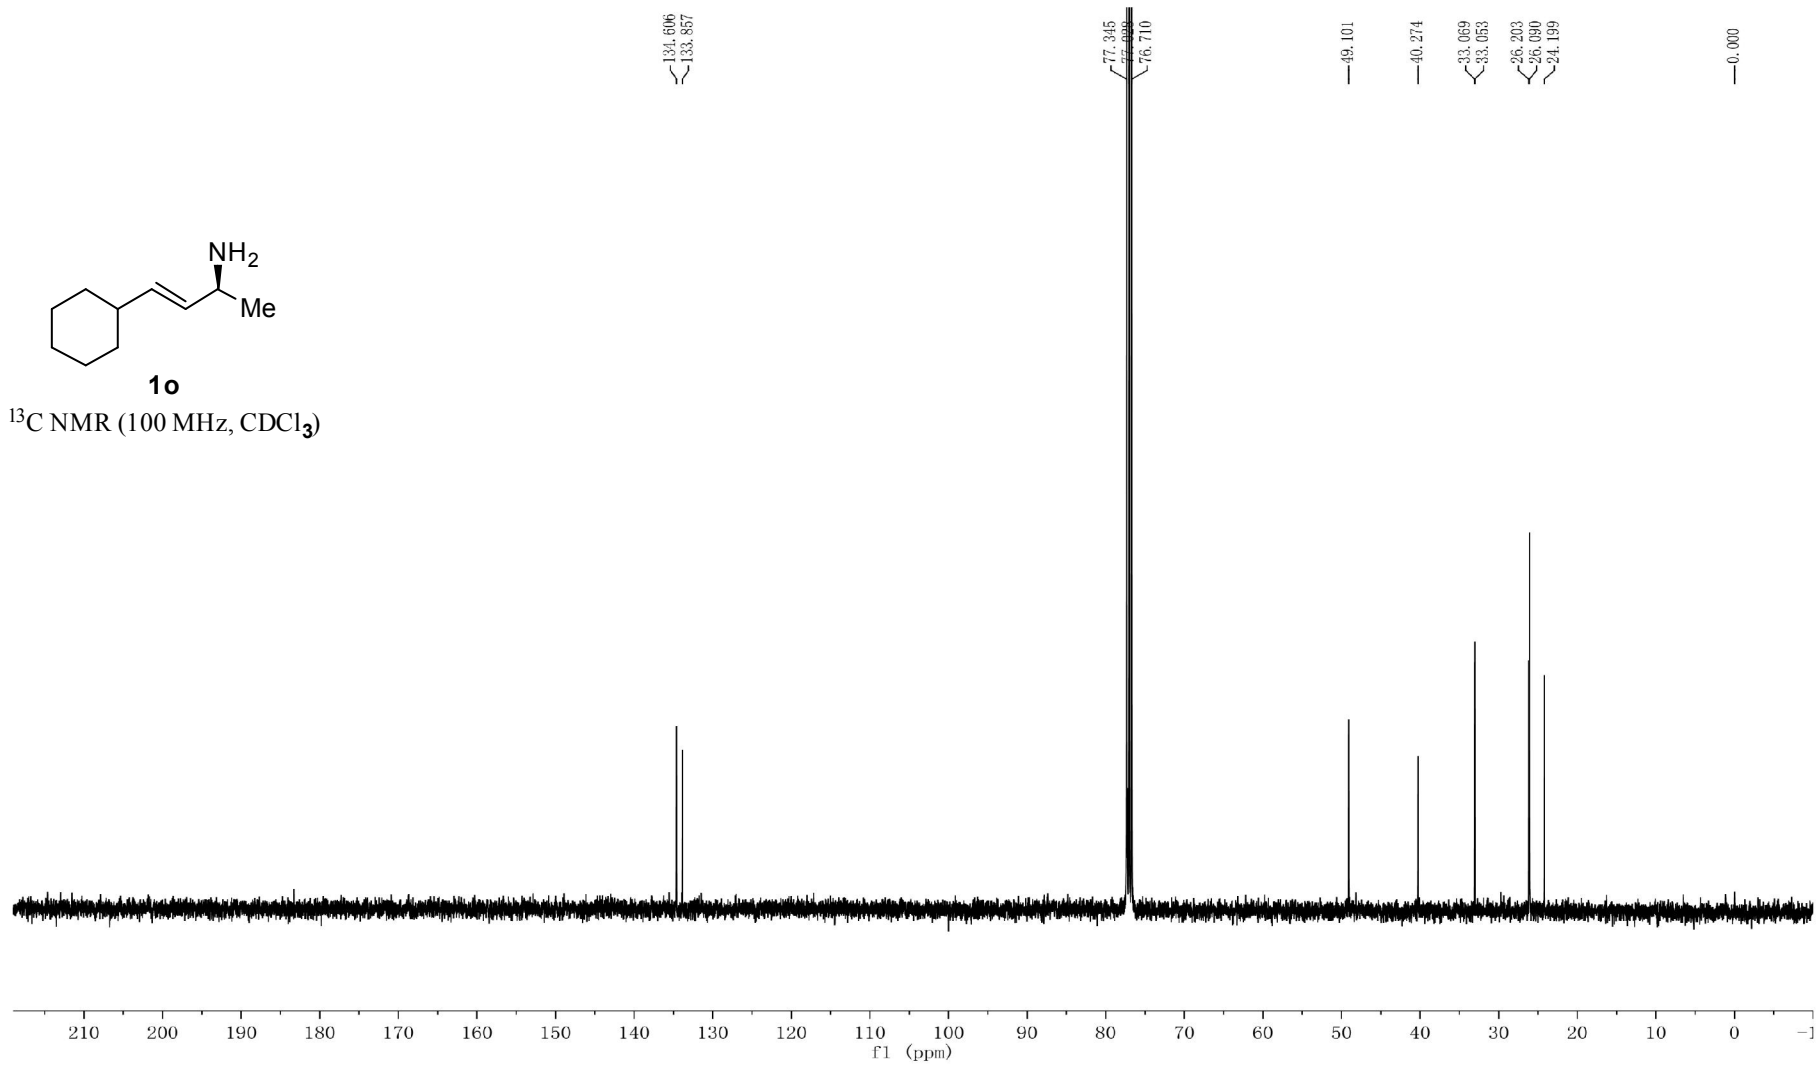

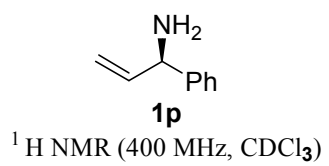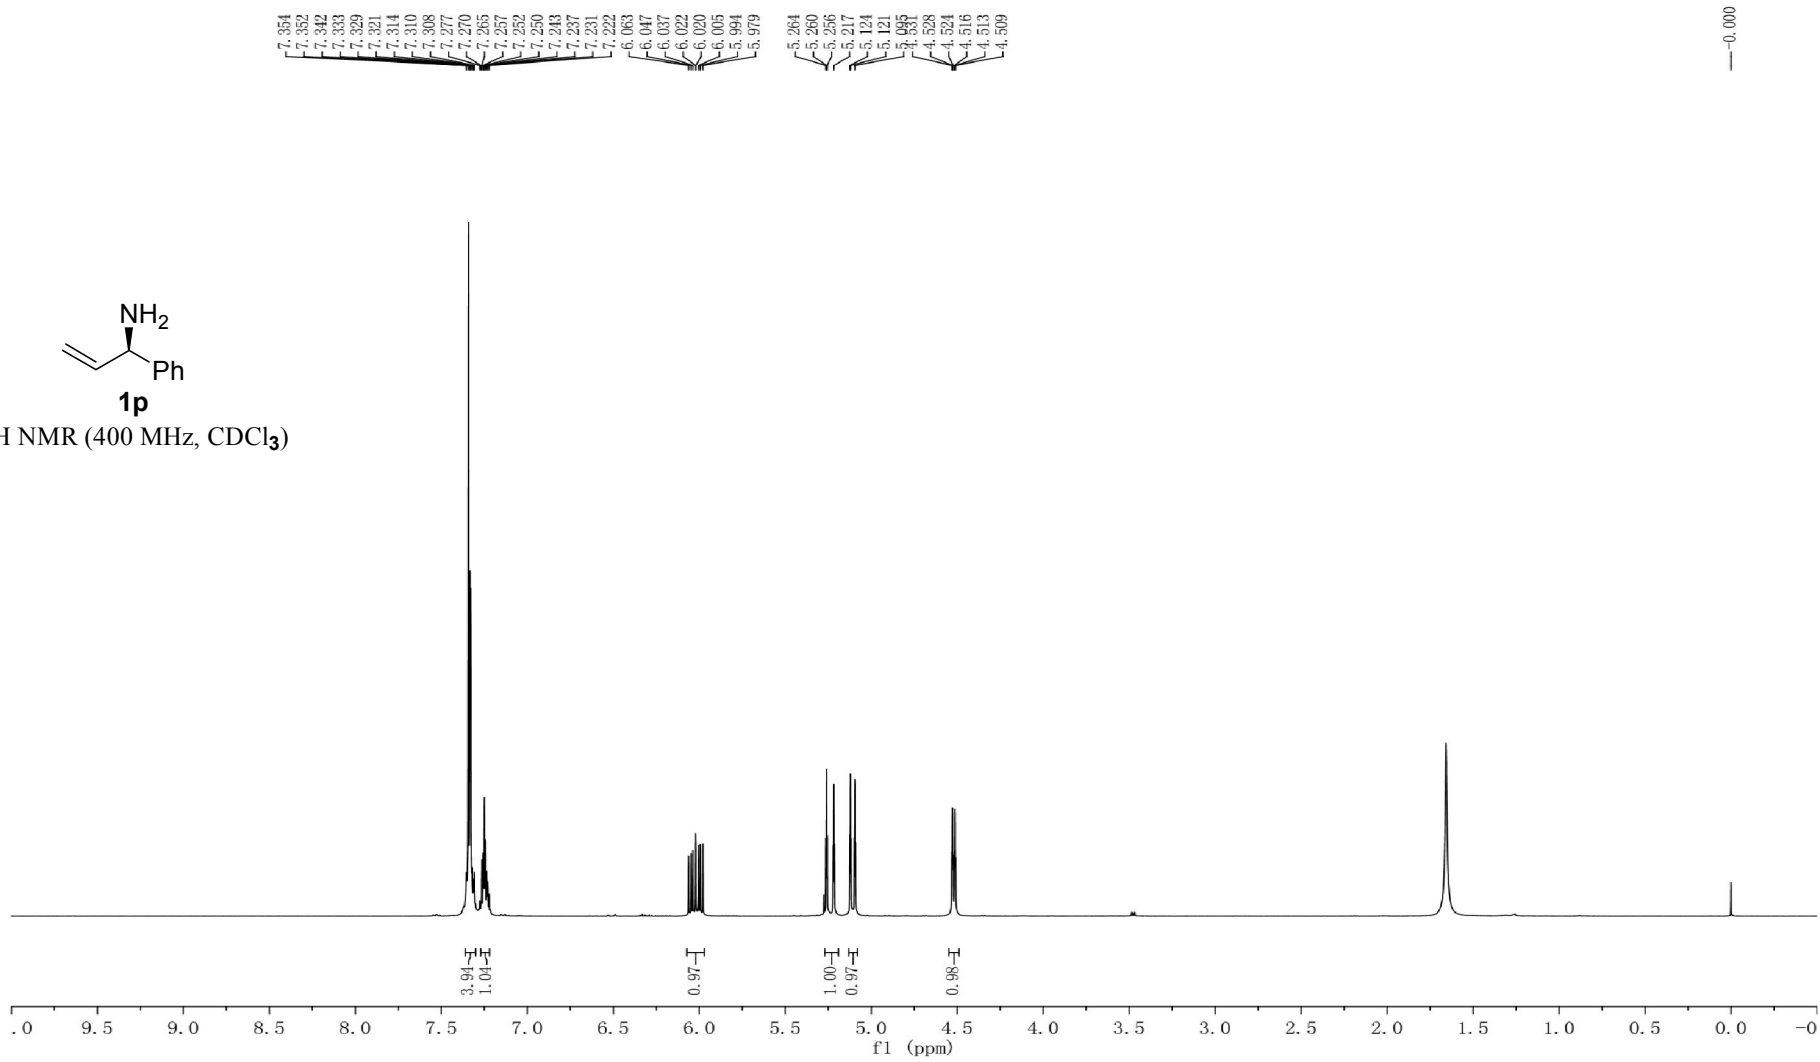

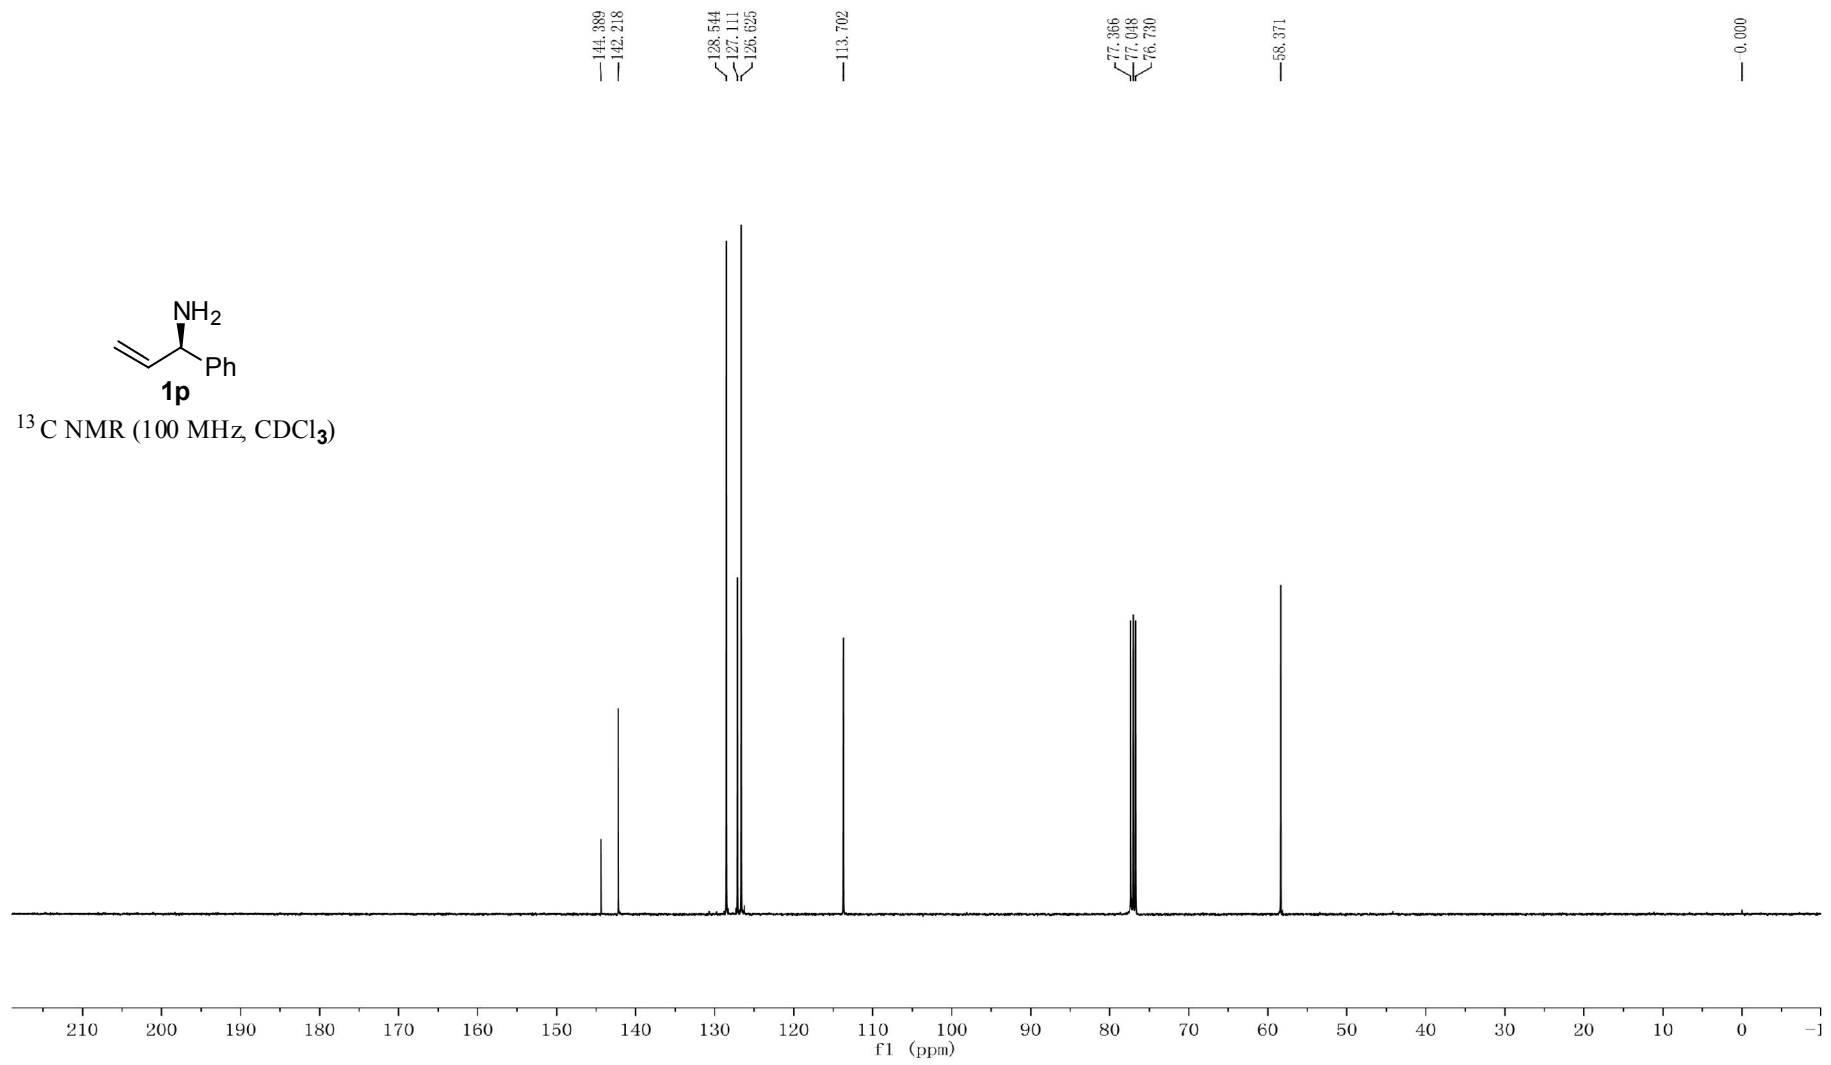

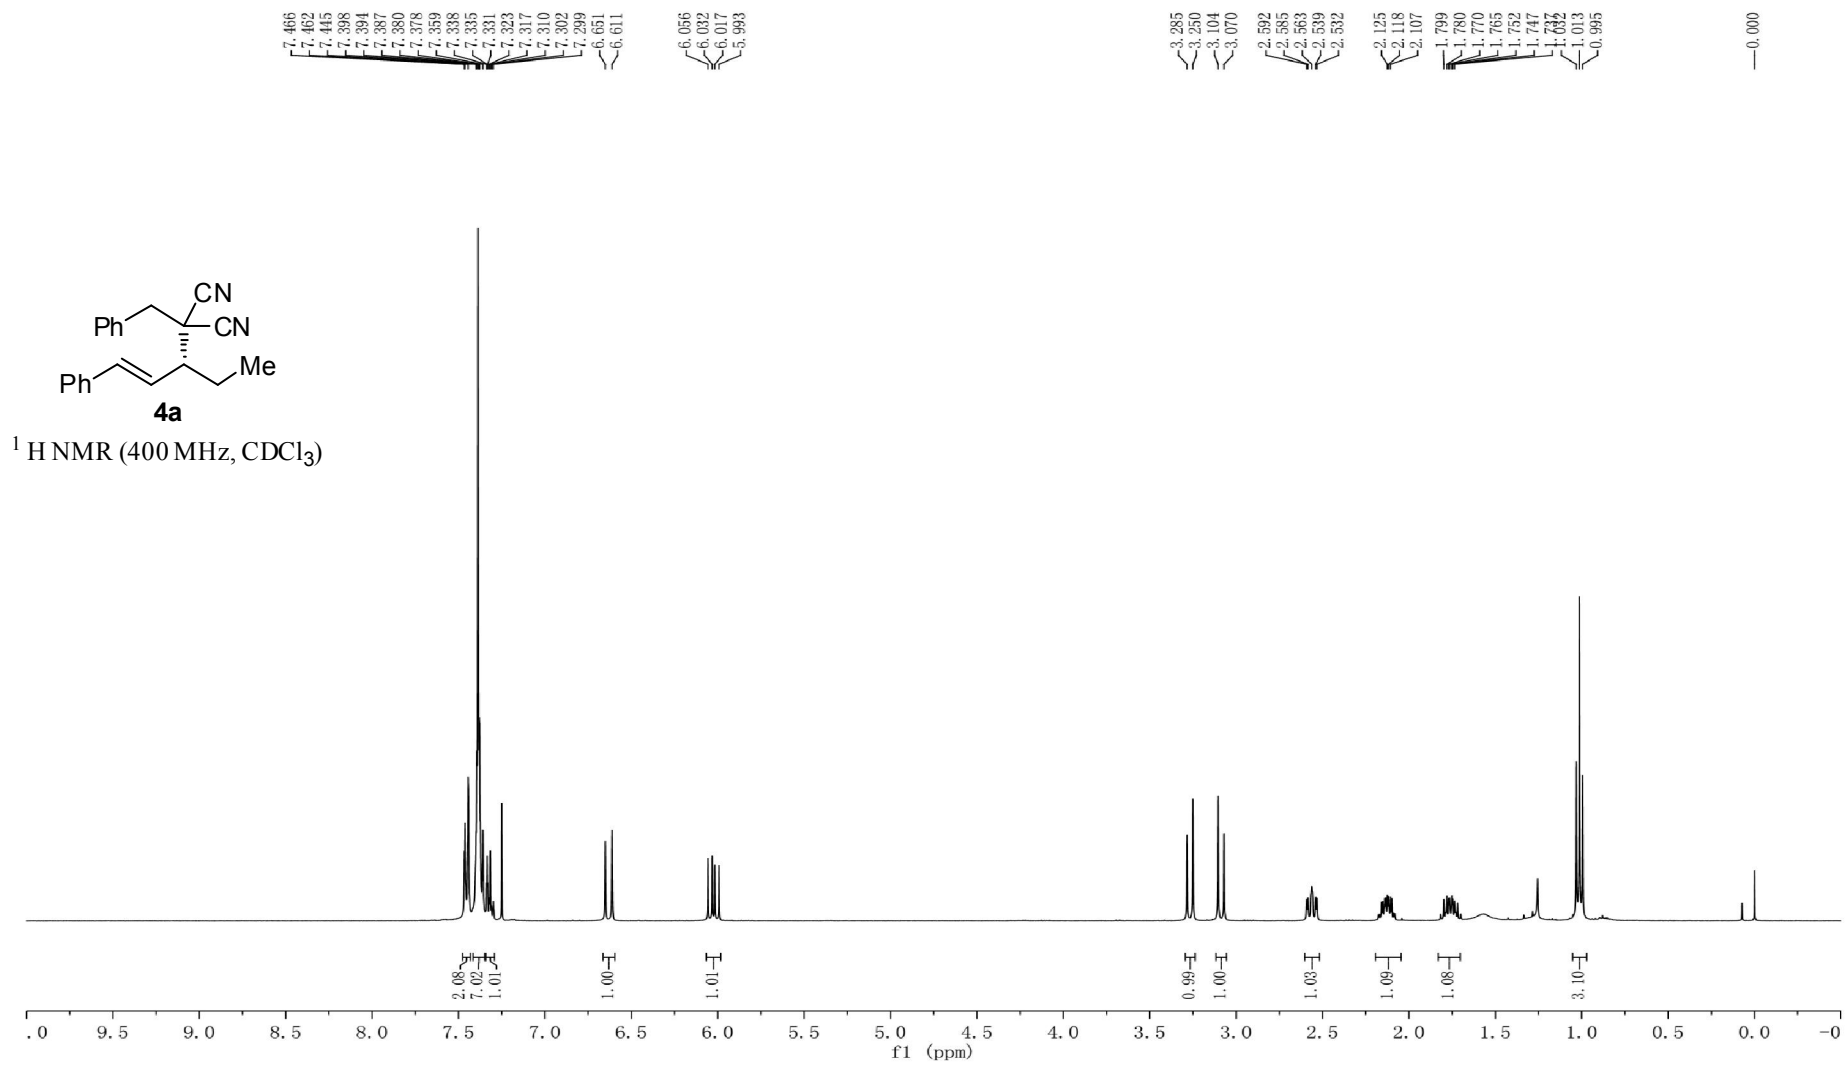

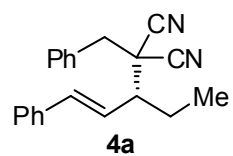

<sup>13</sup>C NMR (100 MHz, CDCl<sub>3</sub>)

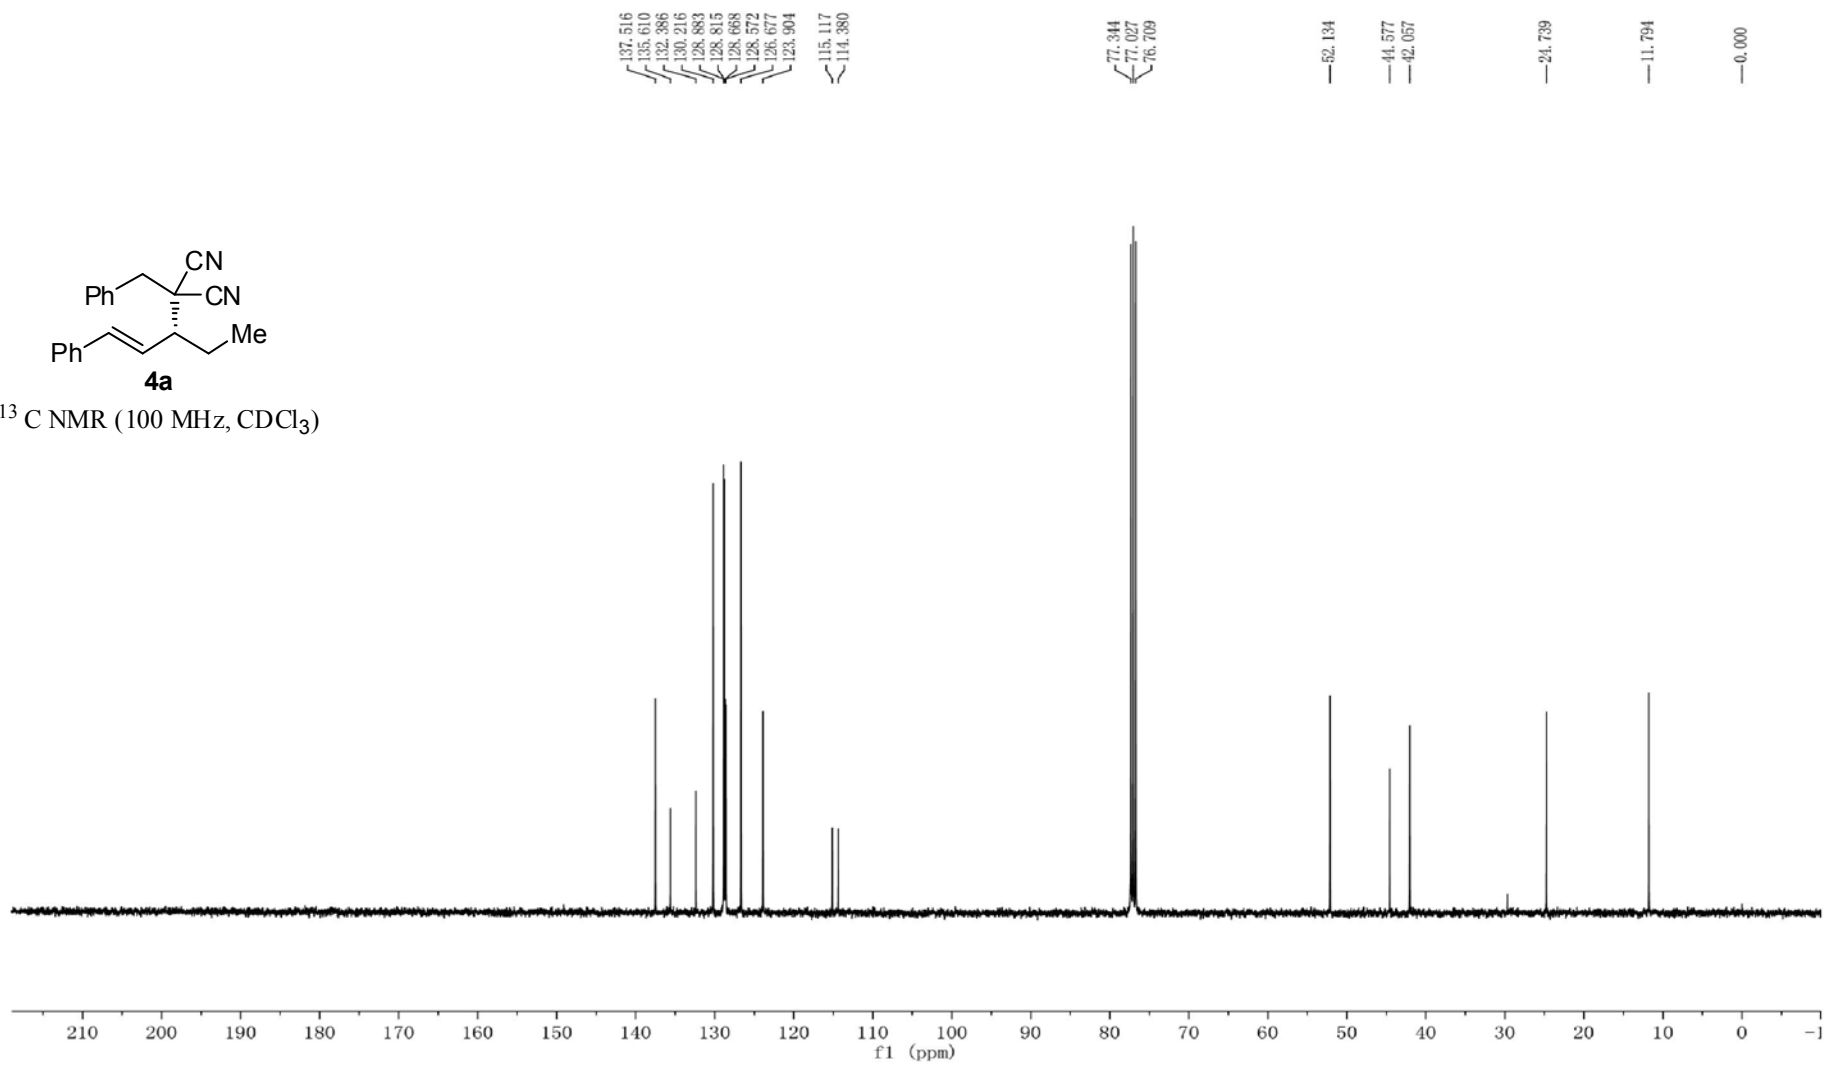

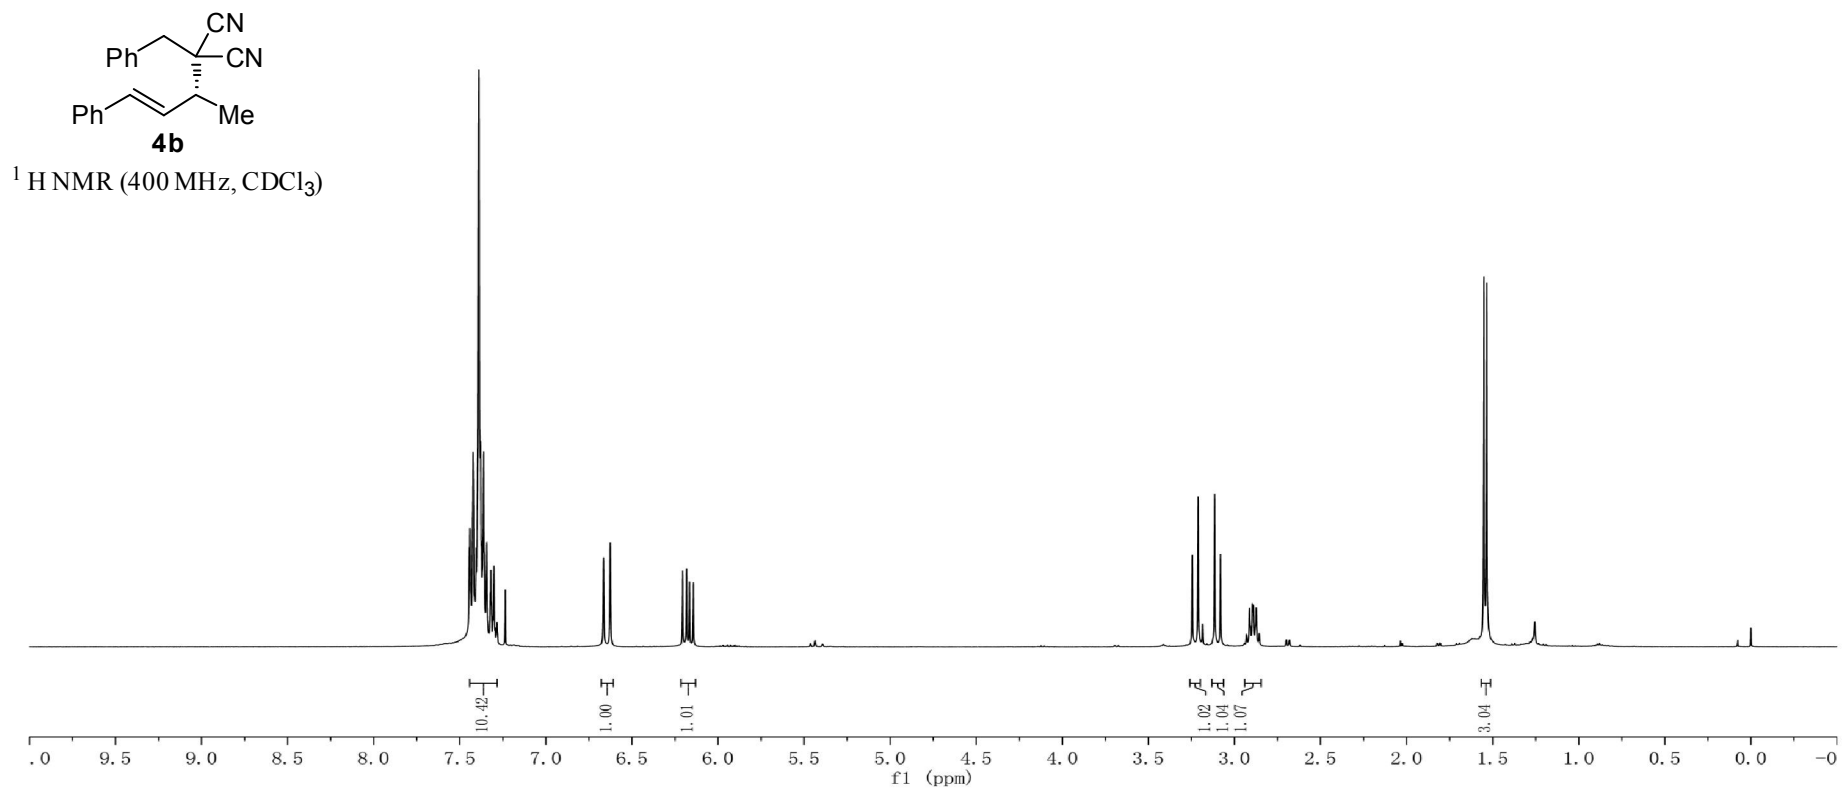

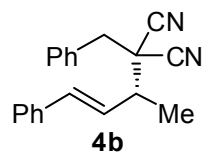

$^{13}\text{C}$  NMR (100 MHz,  $\text{CDCl}_3$ )

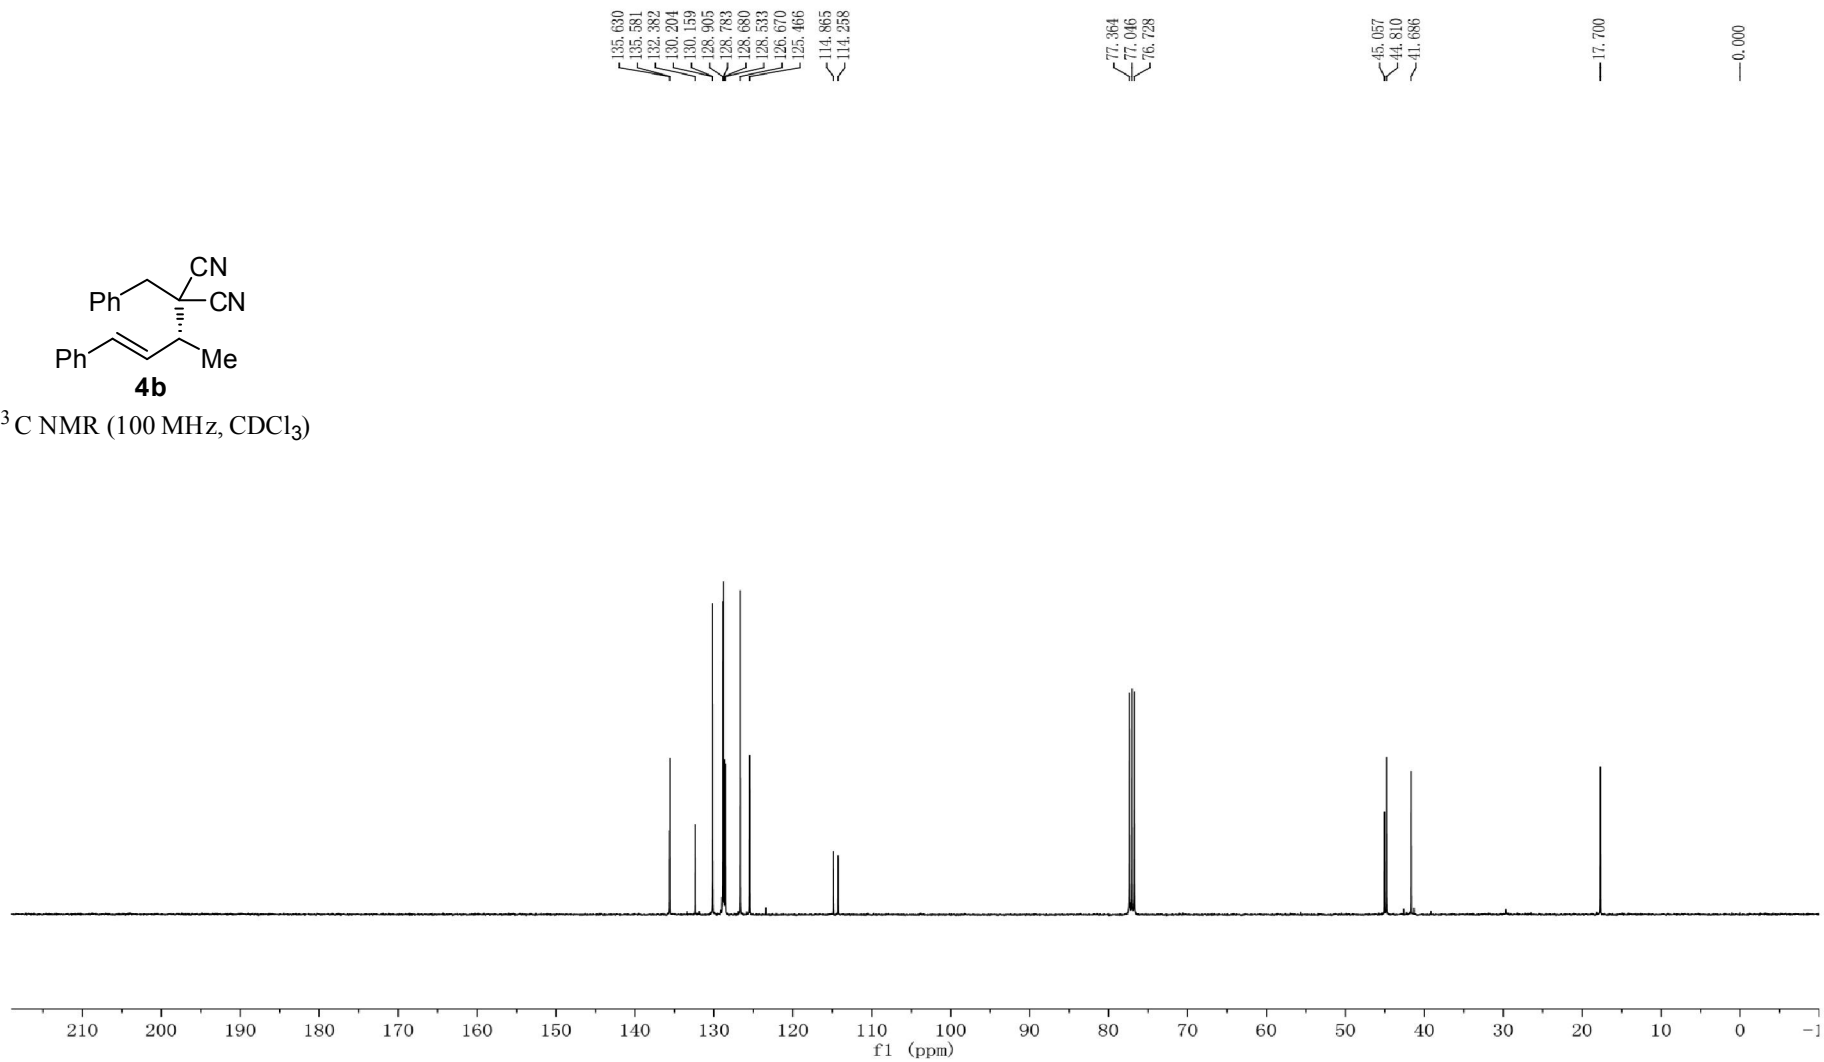



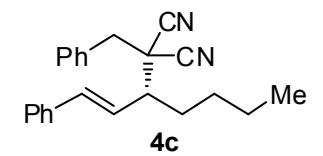

$^1\text{H NMR}$  (400 MHz,  $\text{CDCl}_3$ )

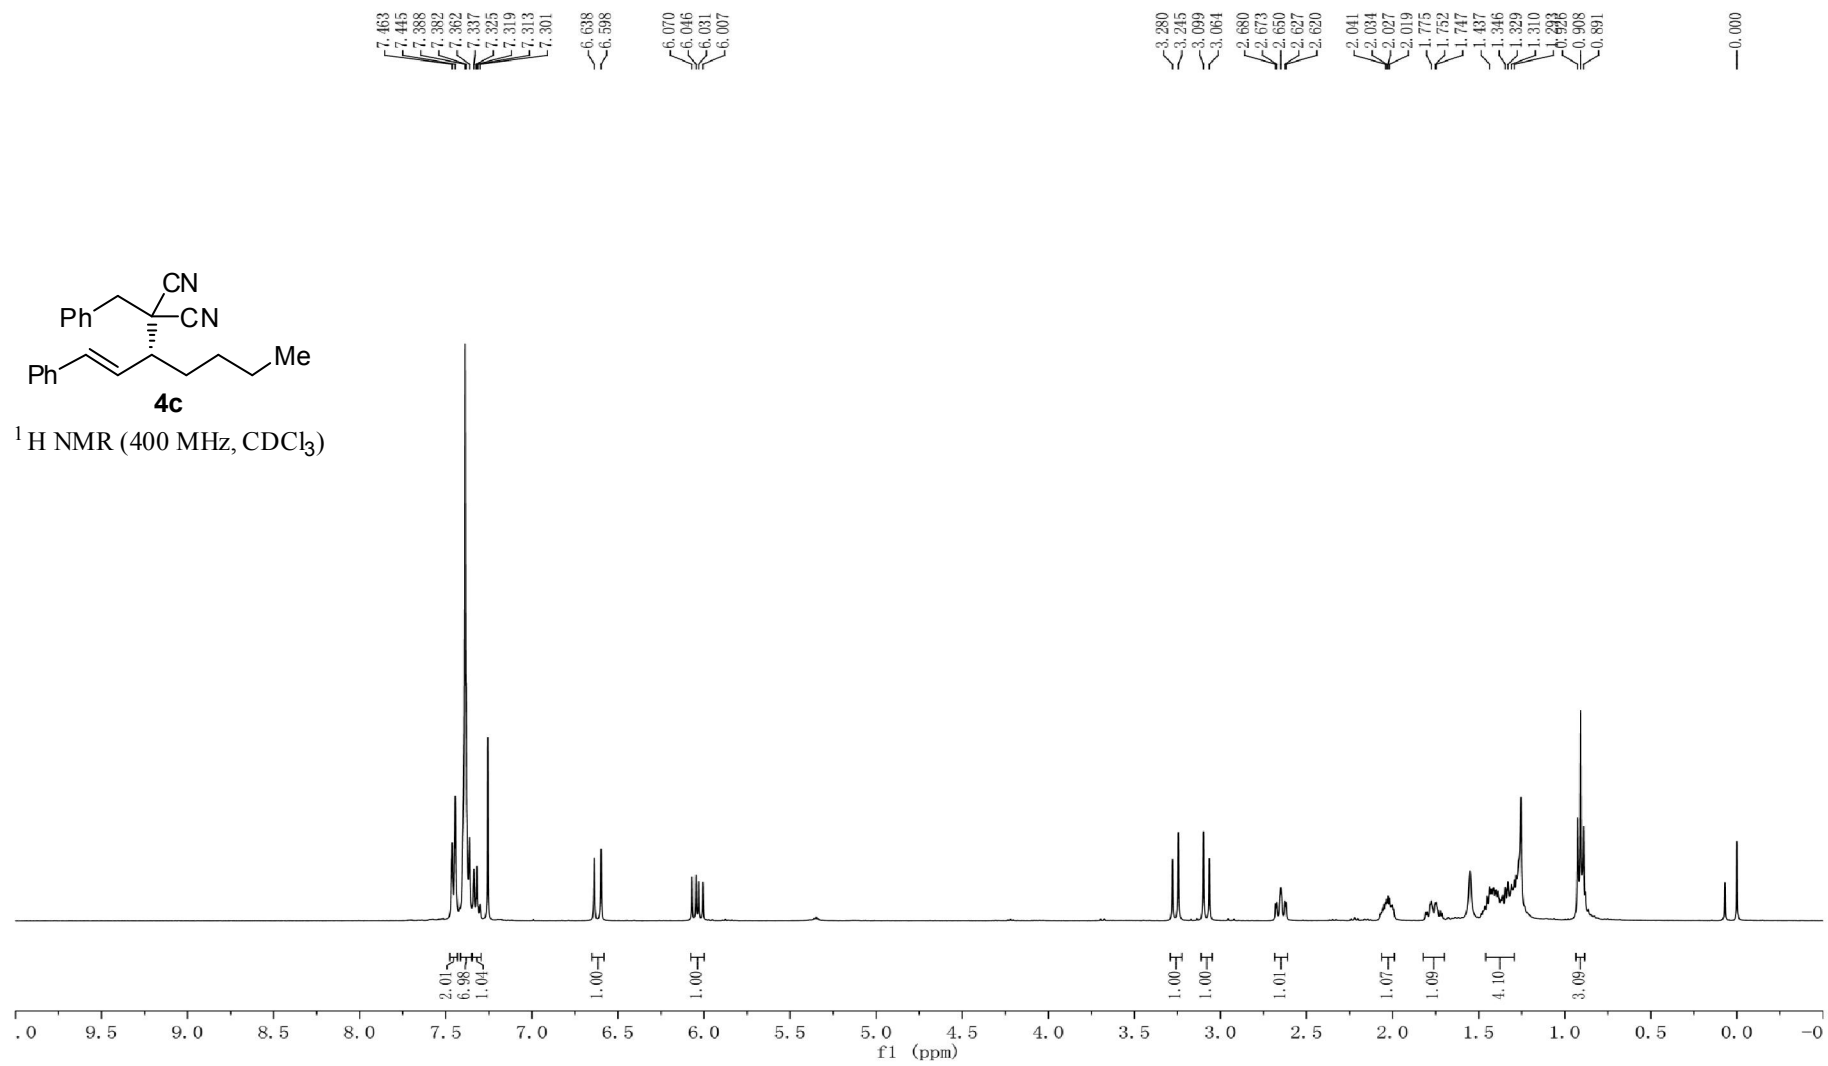

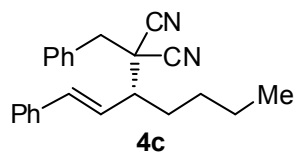

<sup>13</sup>C NMR (100 MHz, CDCl<sub>3</sub>)

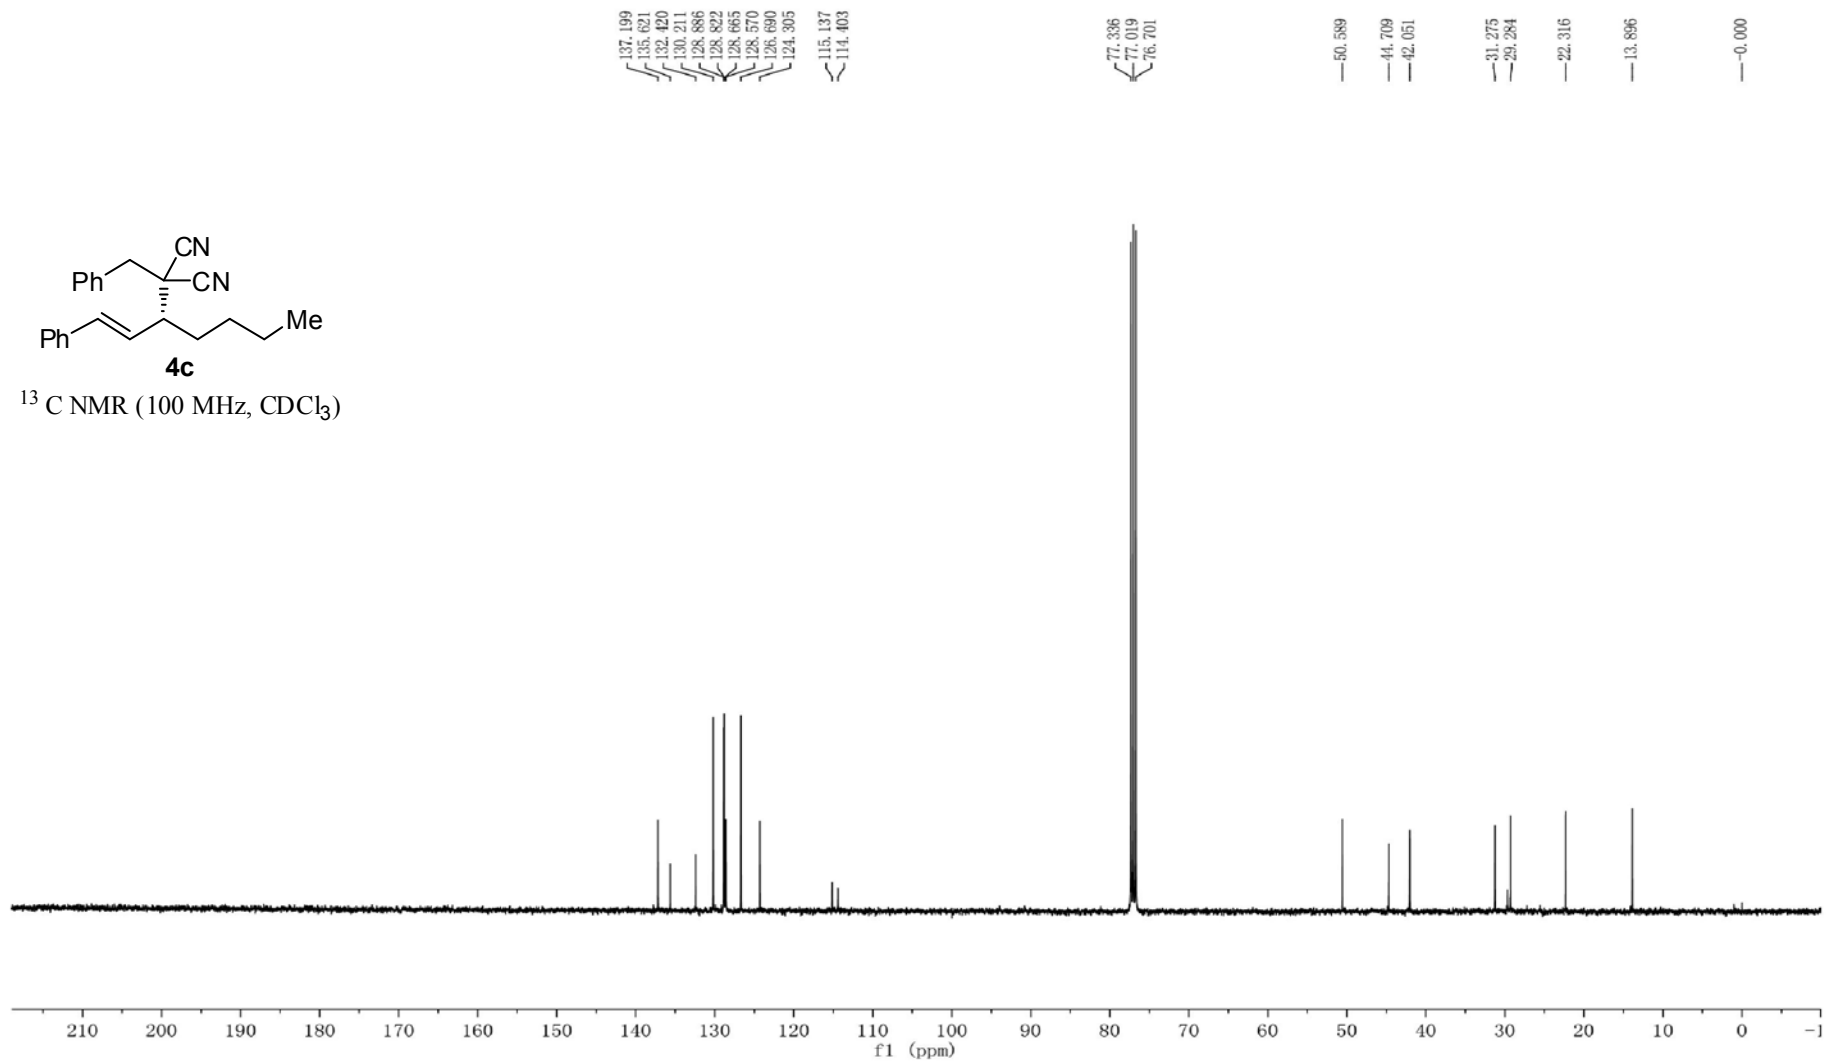

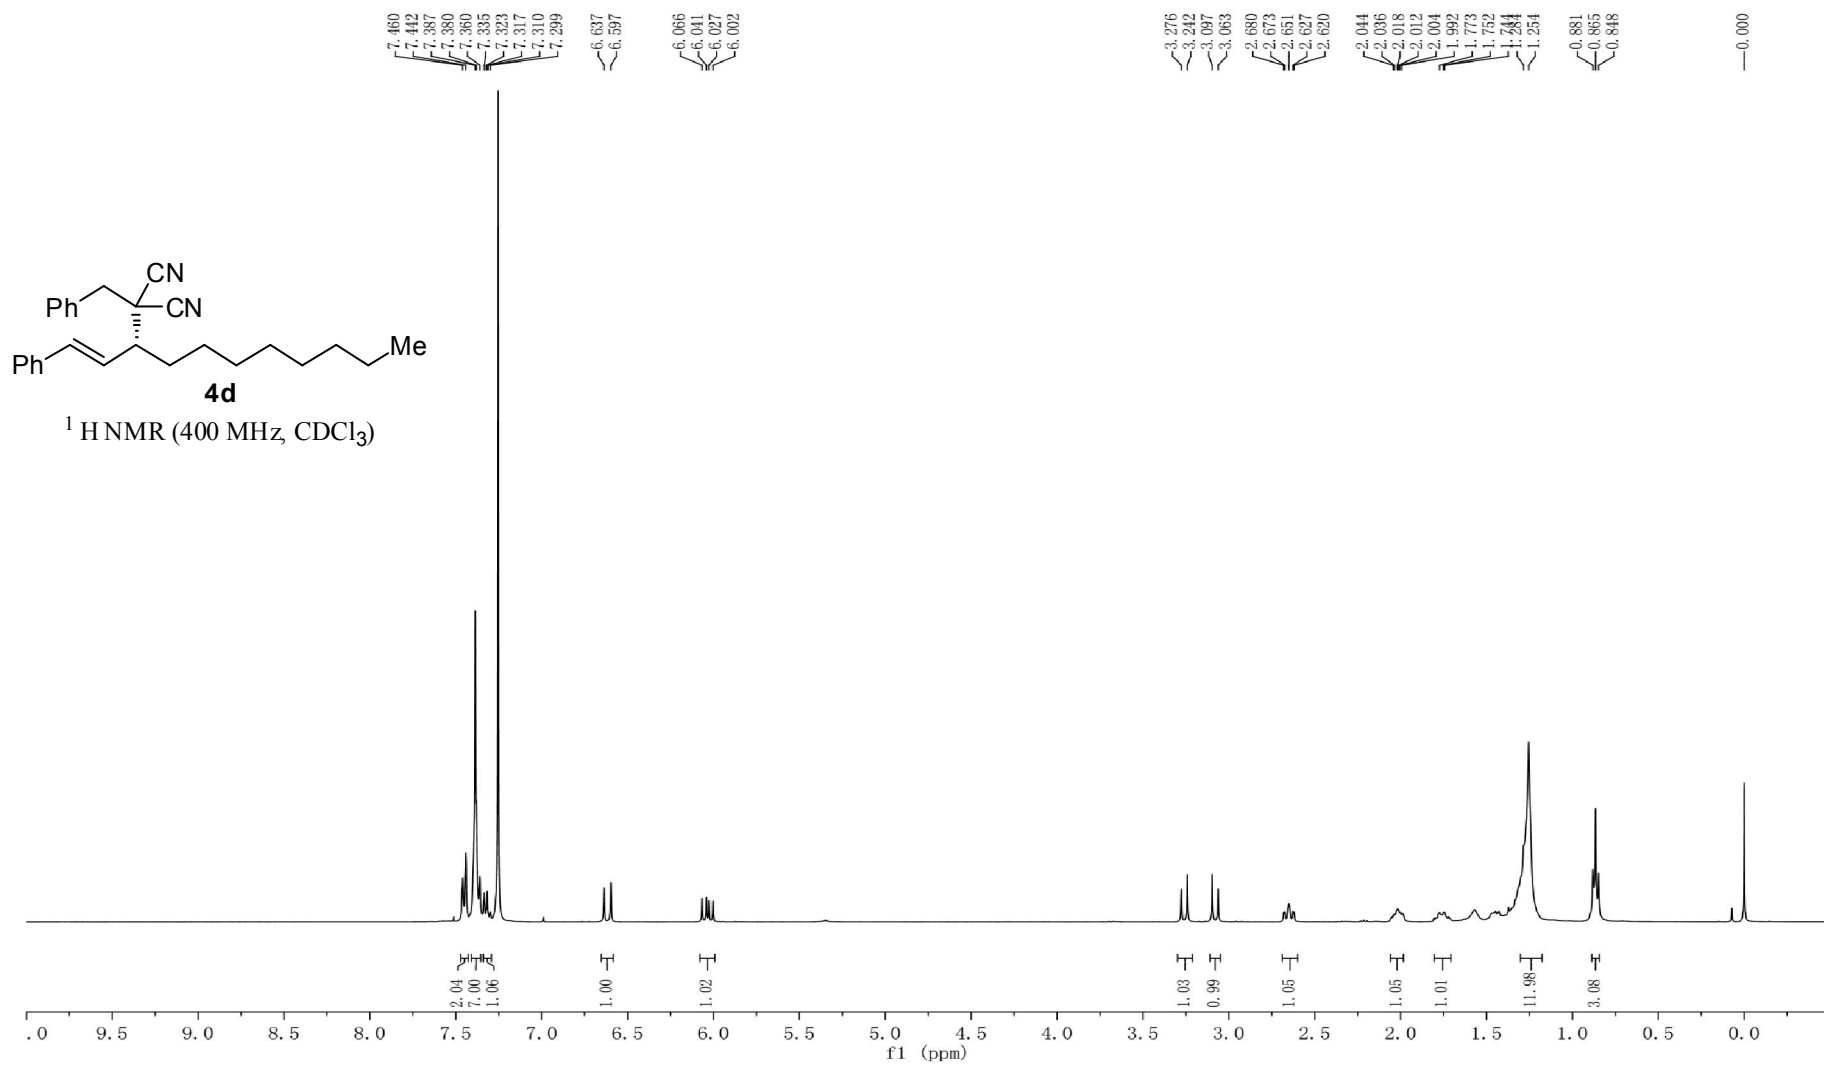

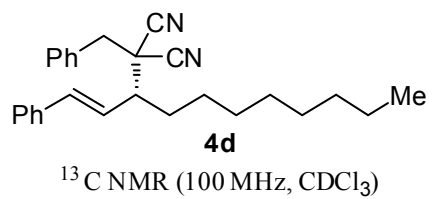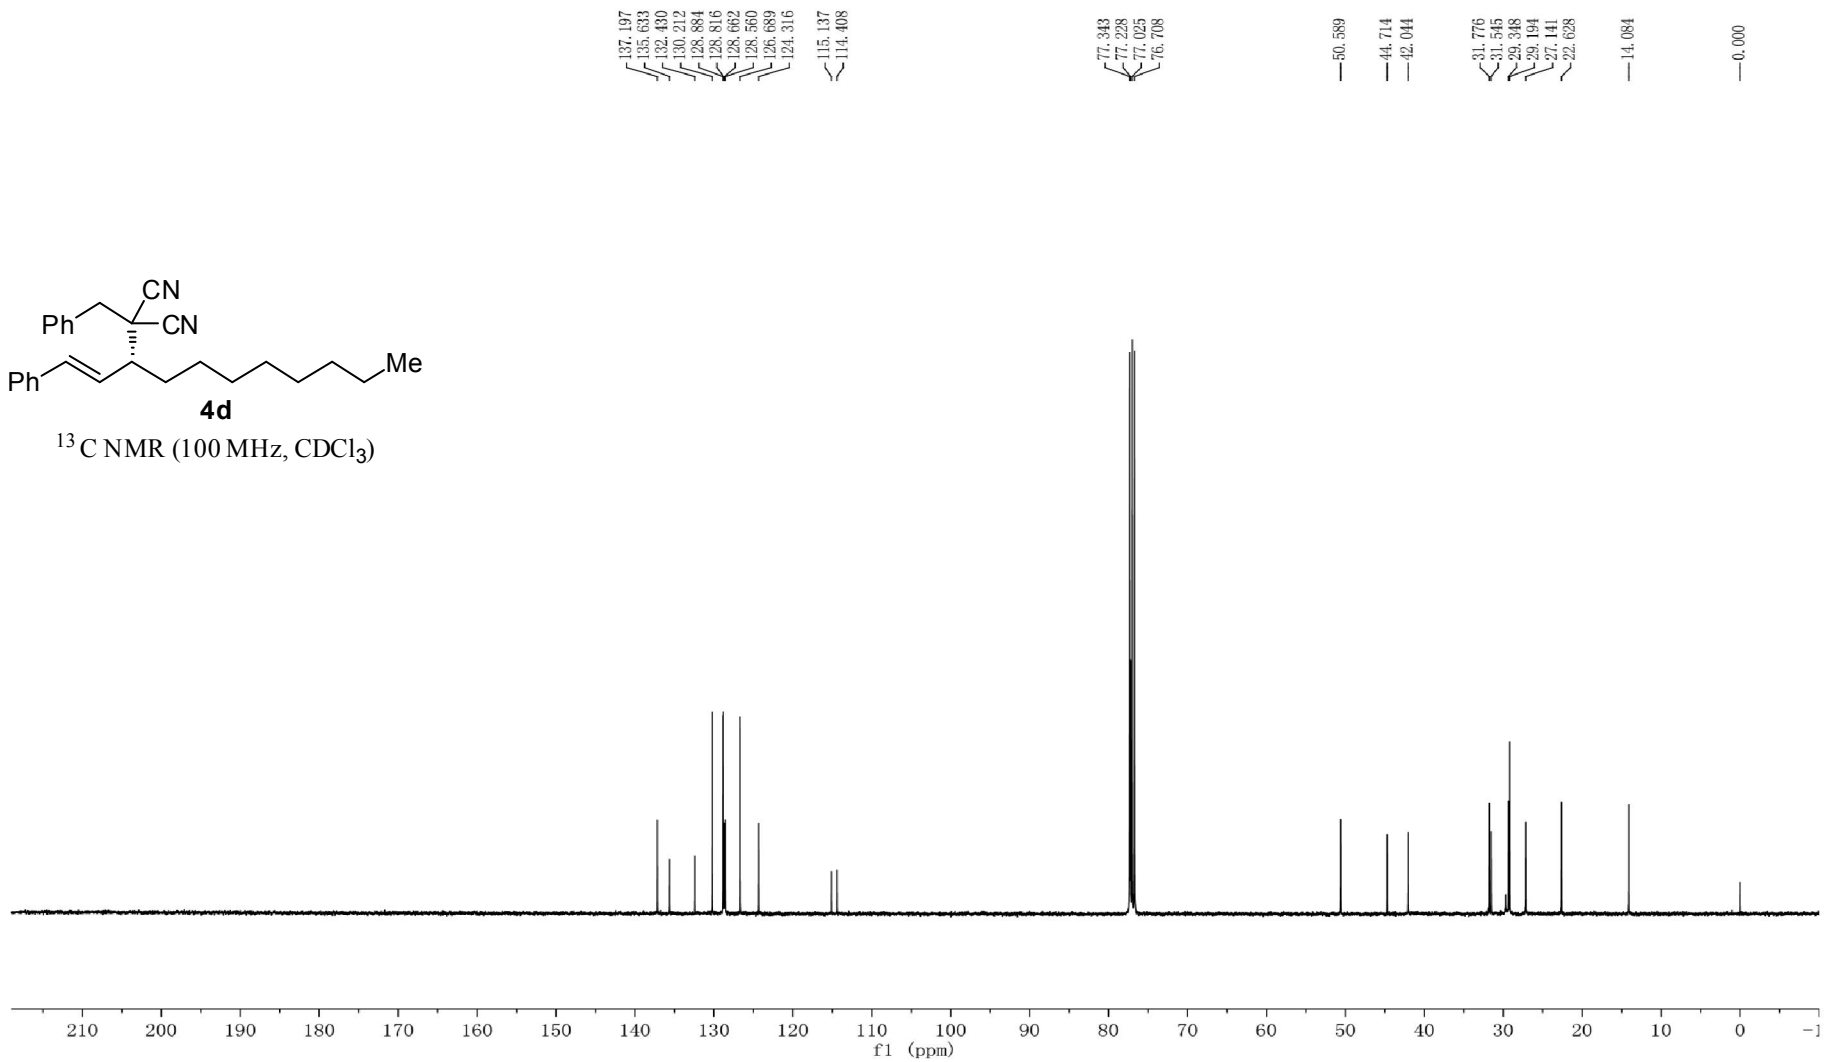

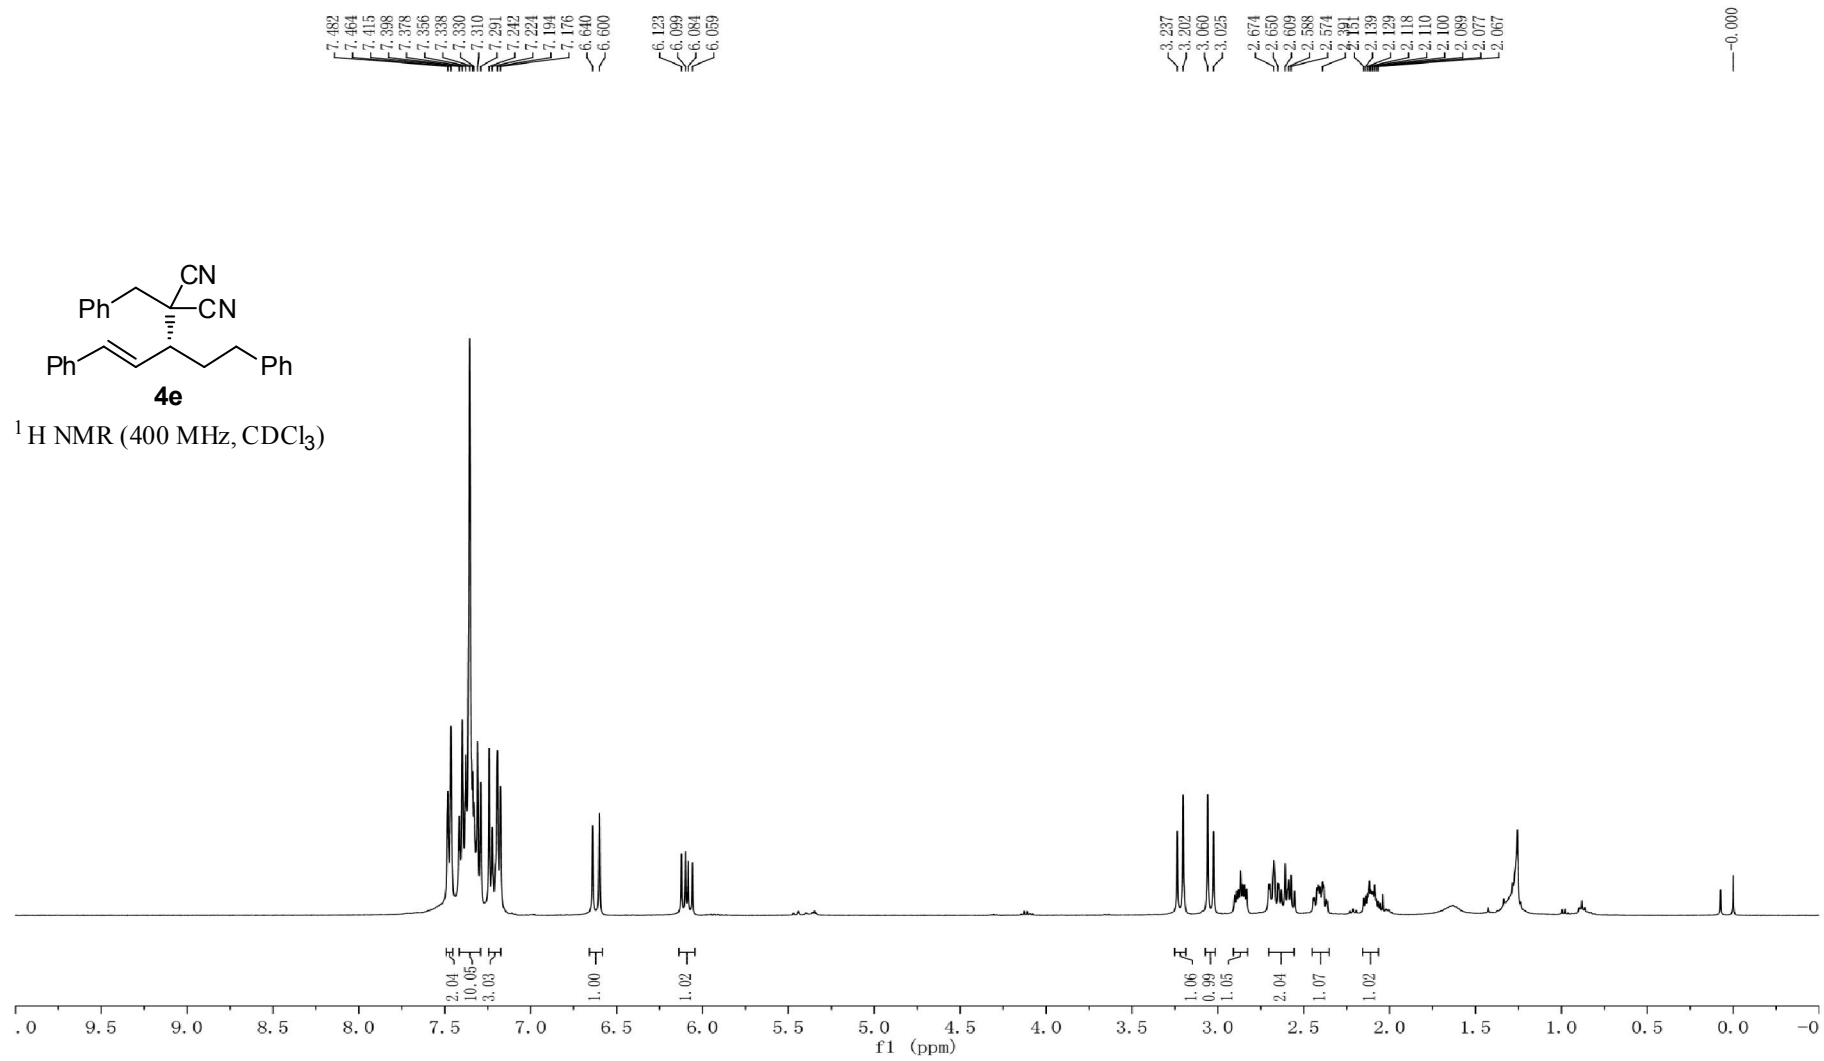

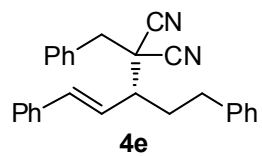

$^{13}\text{C}$  NMR (100 MHz,  $\text{CDCl}_3$ )

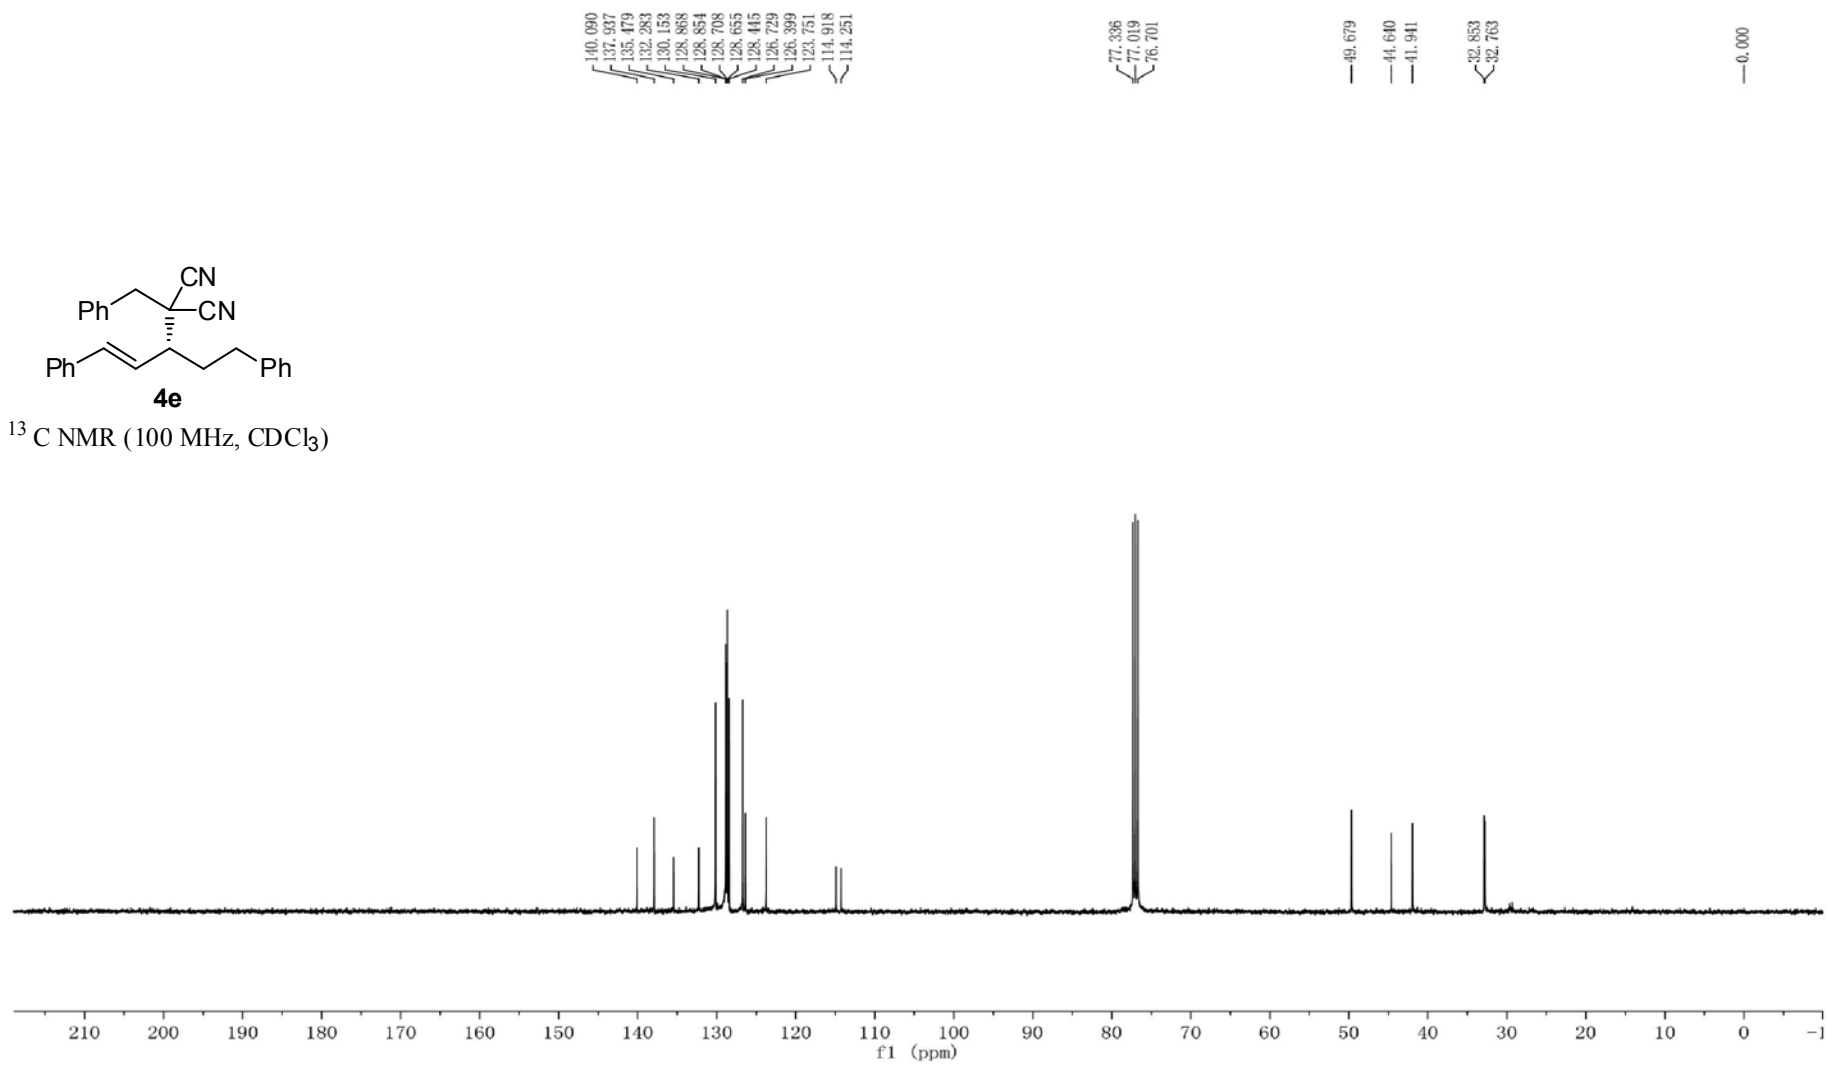

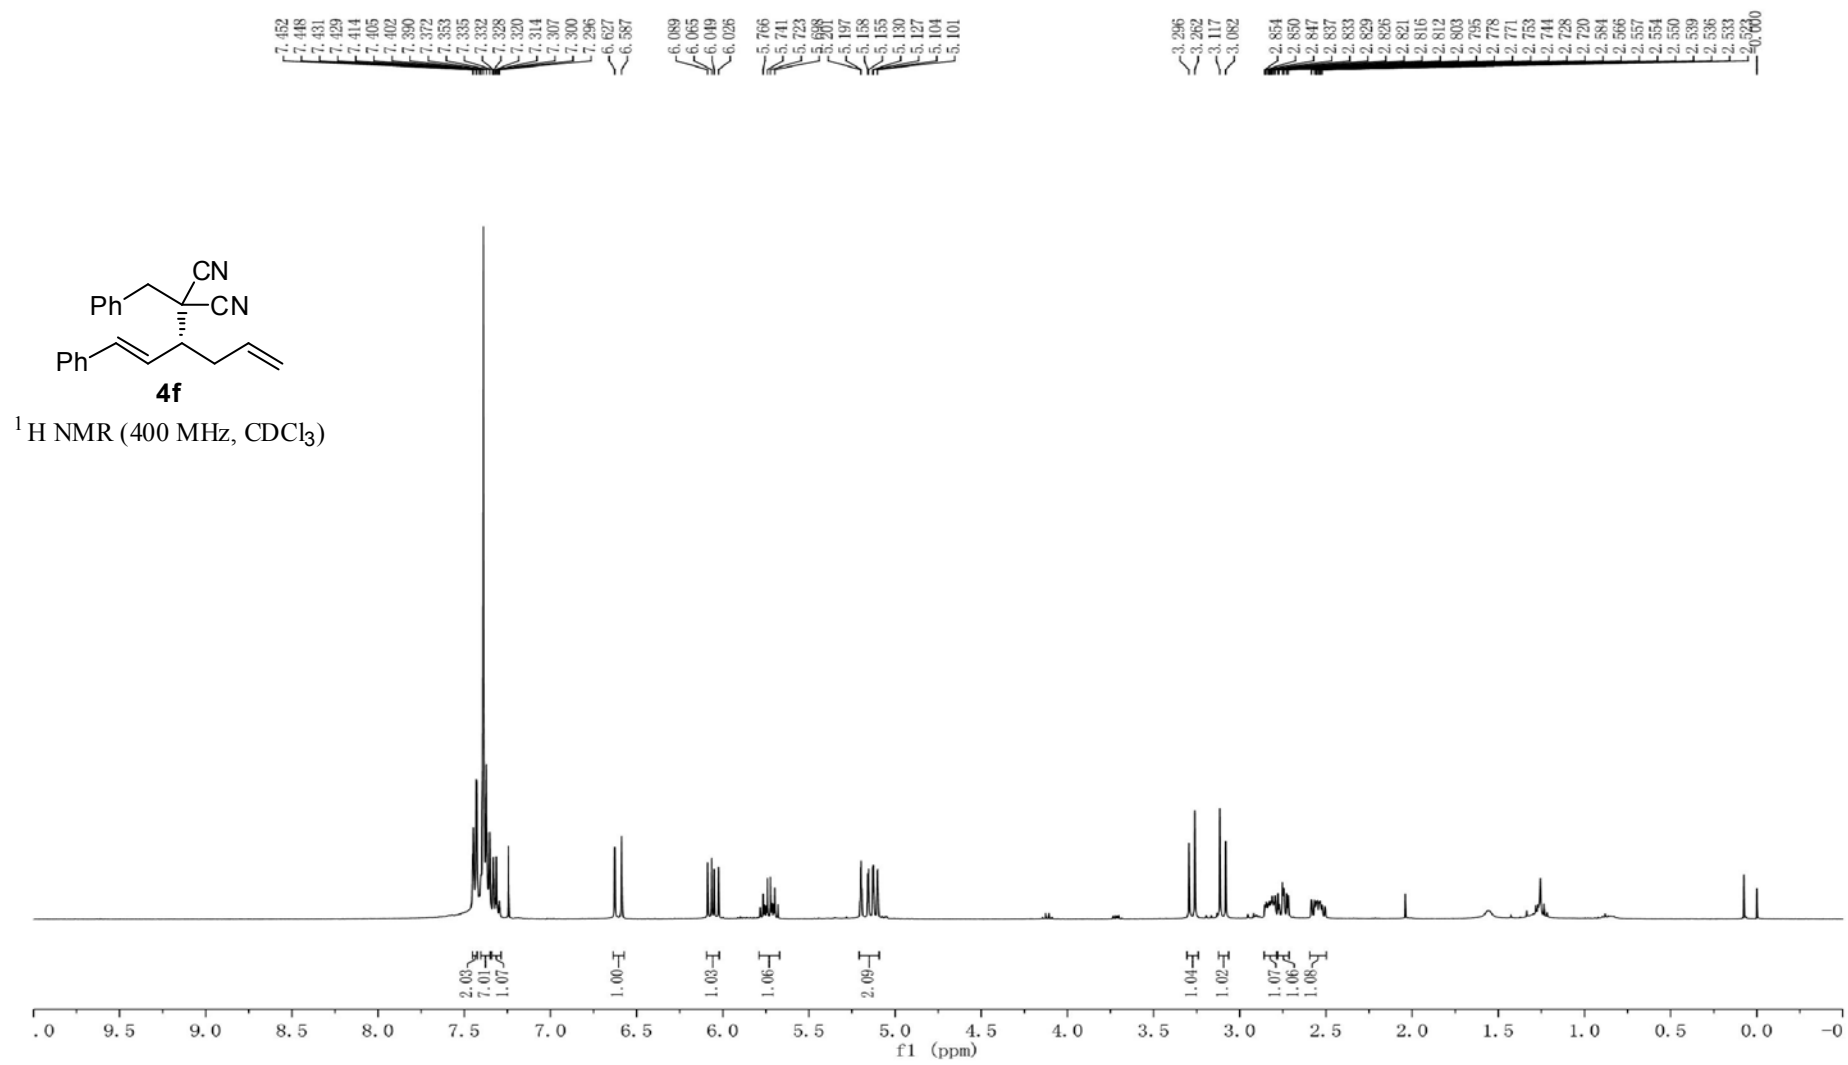

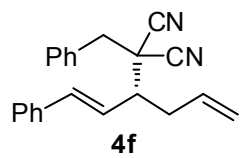

$^{13}\text{C}$  NMR (100 MHz,  $\text{CDCl}_3$ )

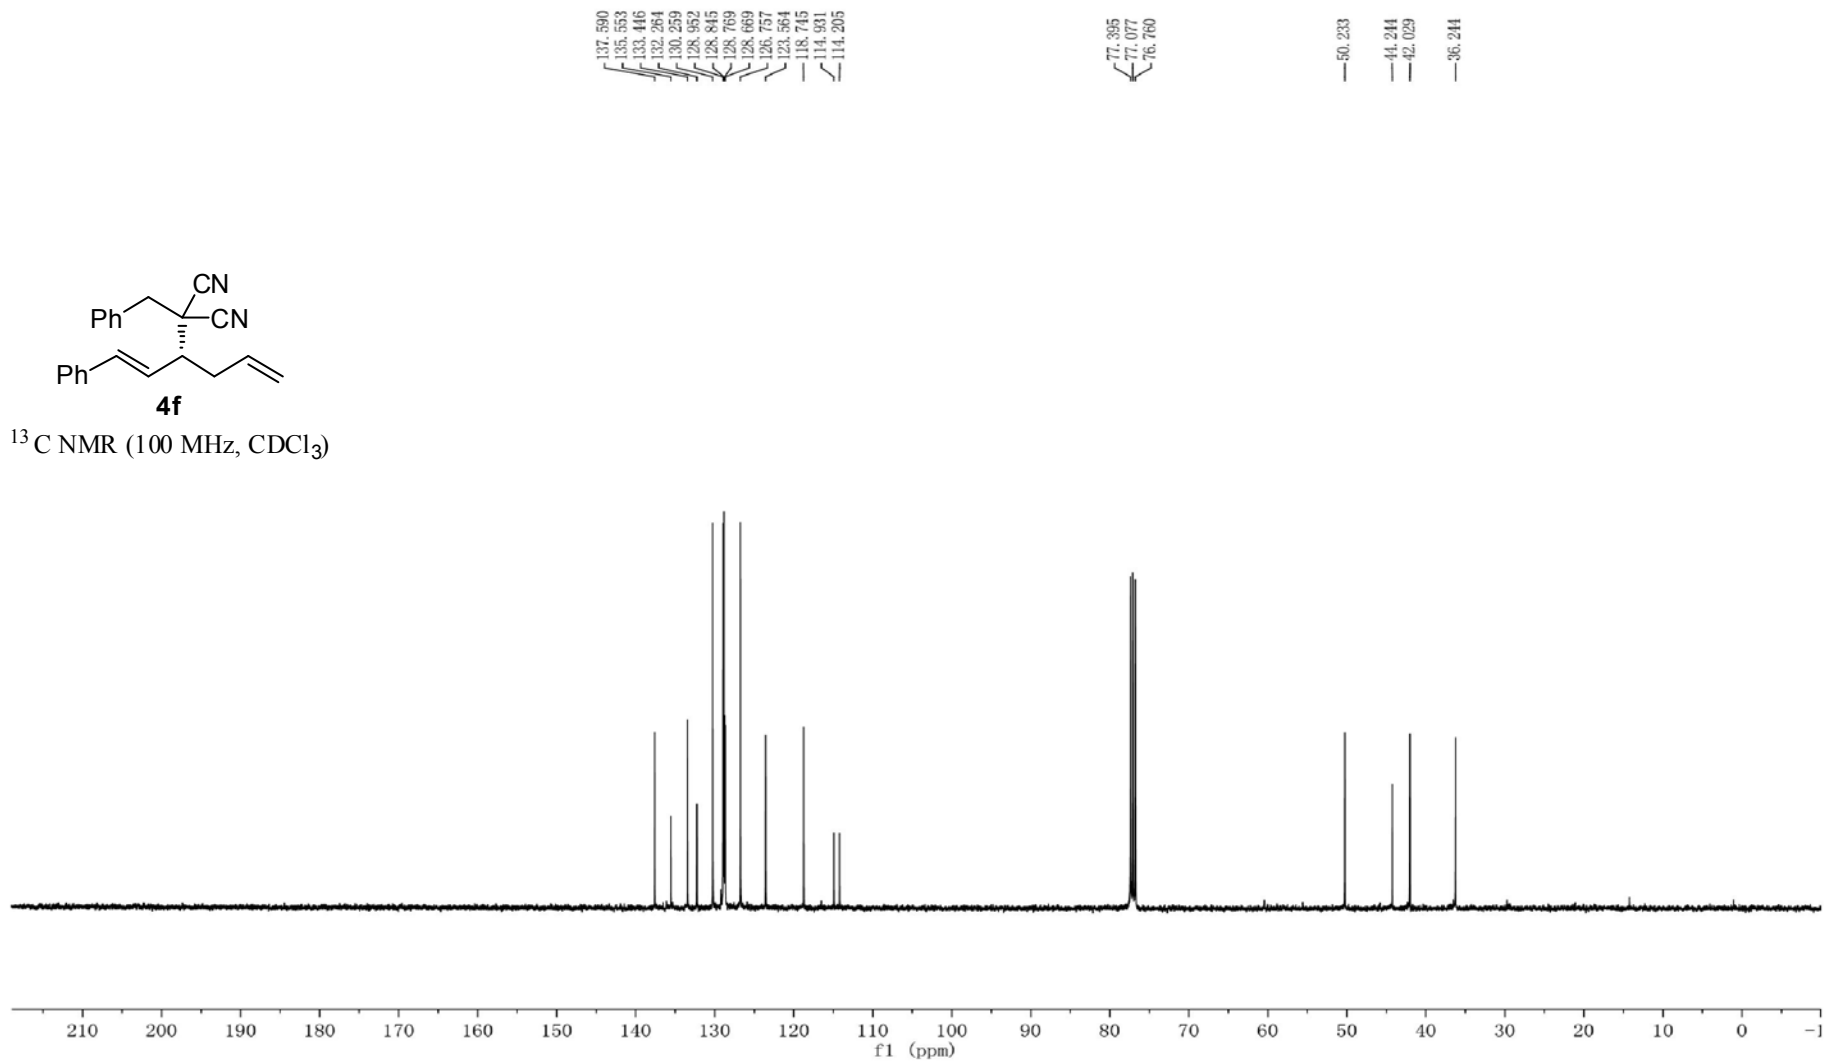



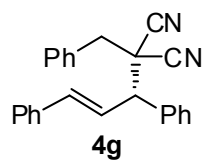

$^1\text{H NMR}$  (400 MHz,  $\text{CDCl}_3$ )

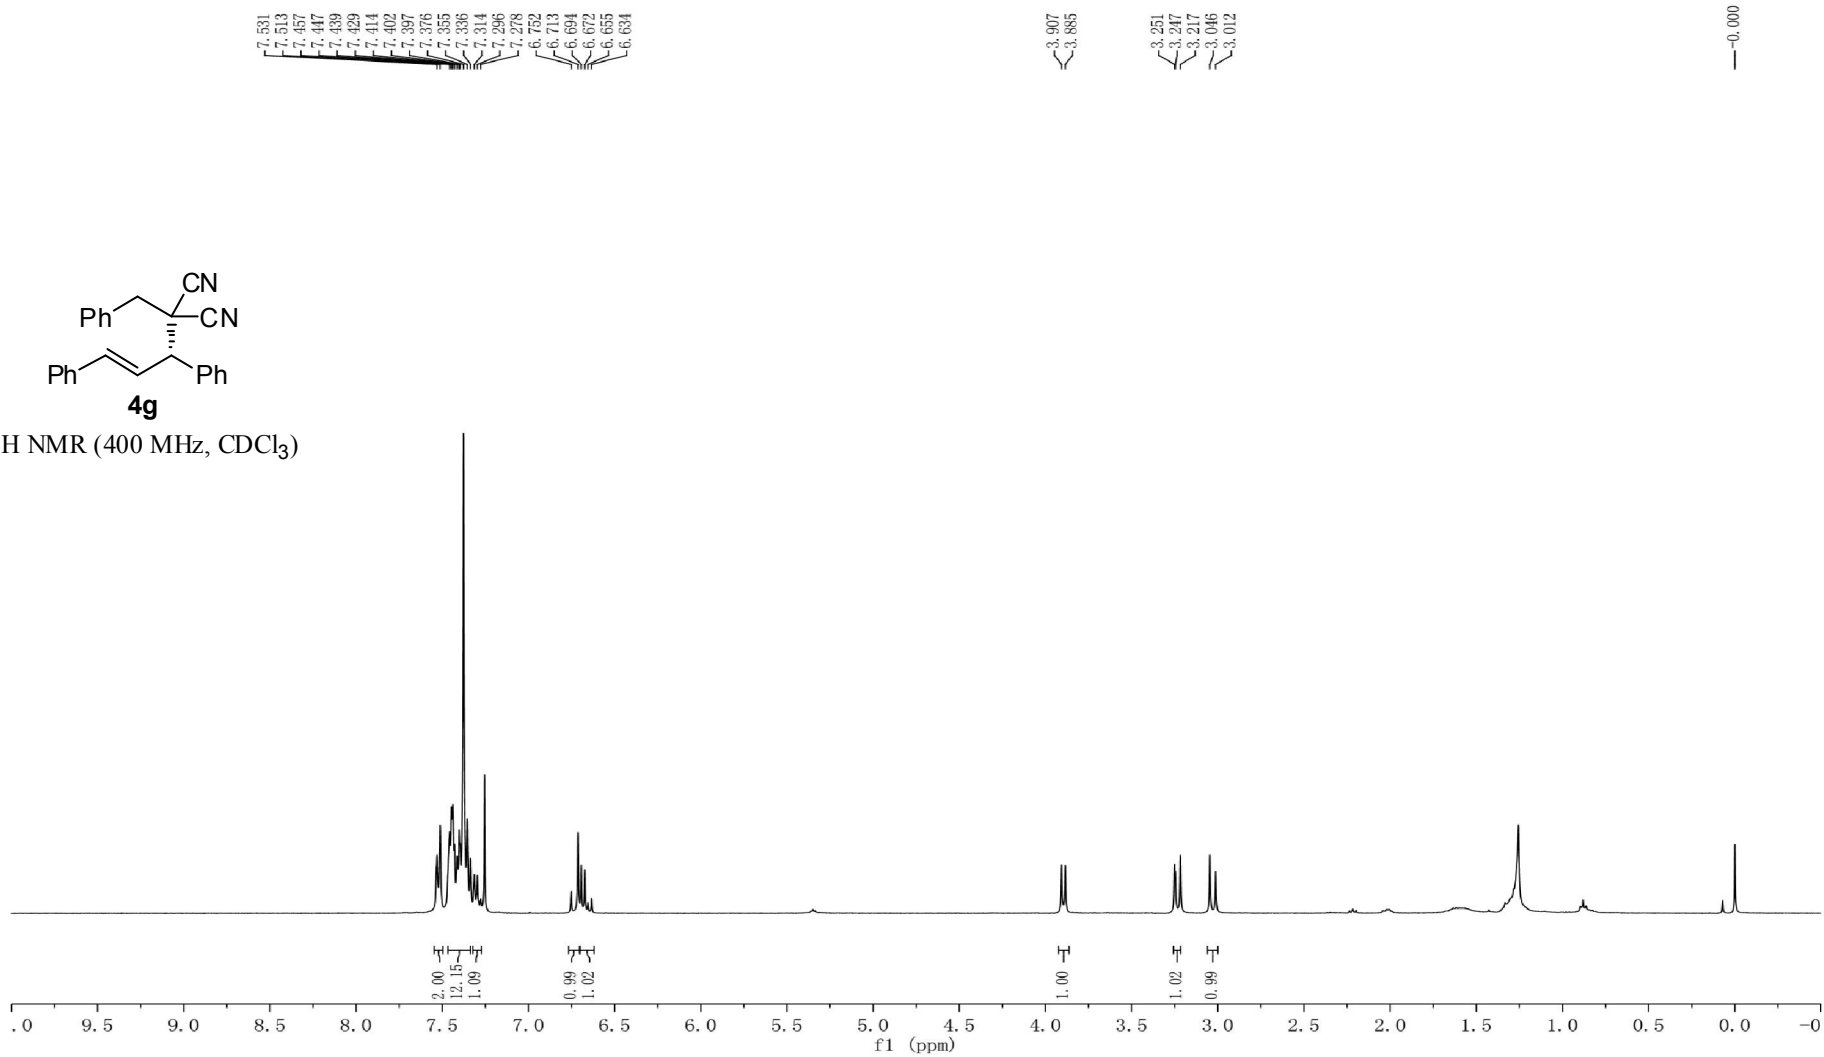

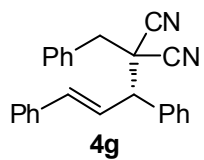

<sup>13</sup>C NMR (100 MHz, CDCl<sub>3</sub>)

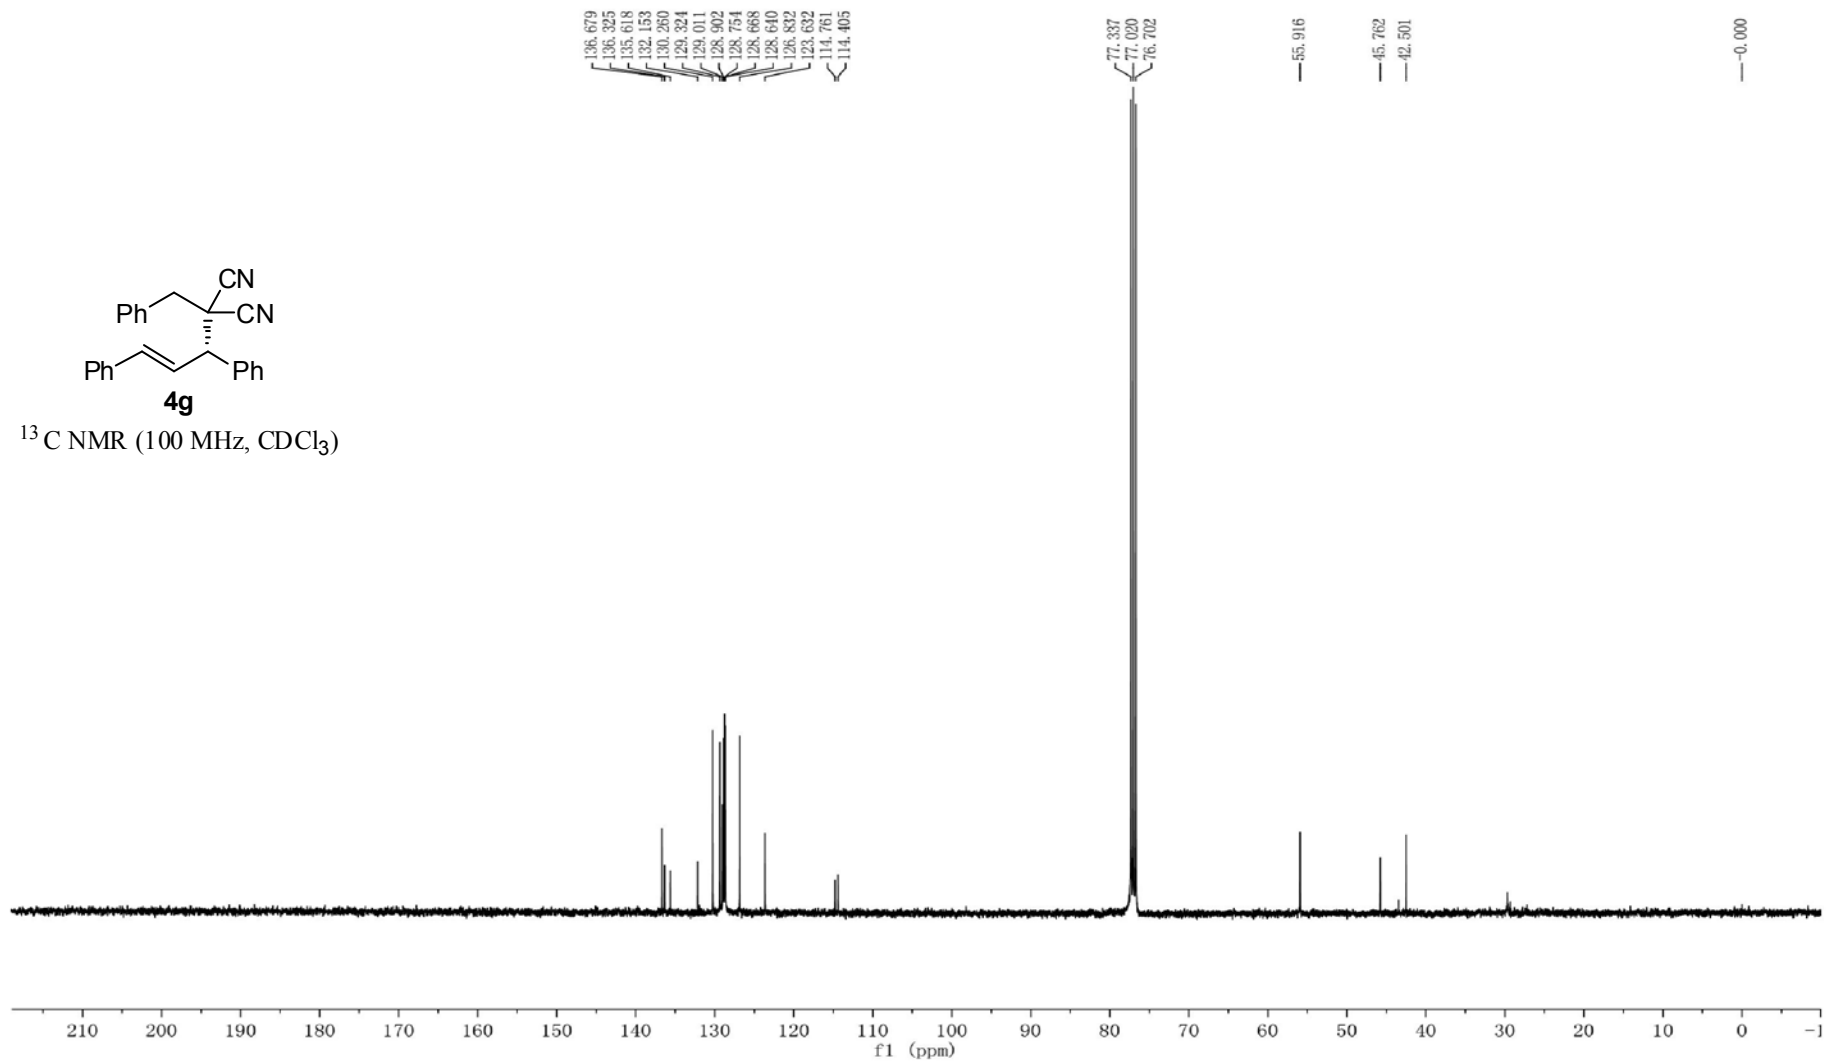

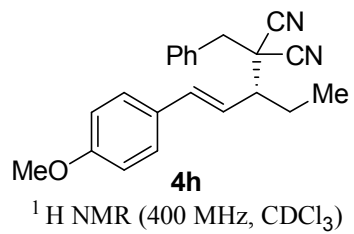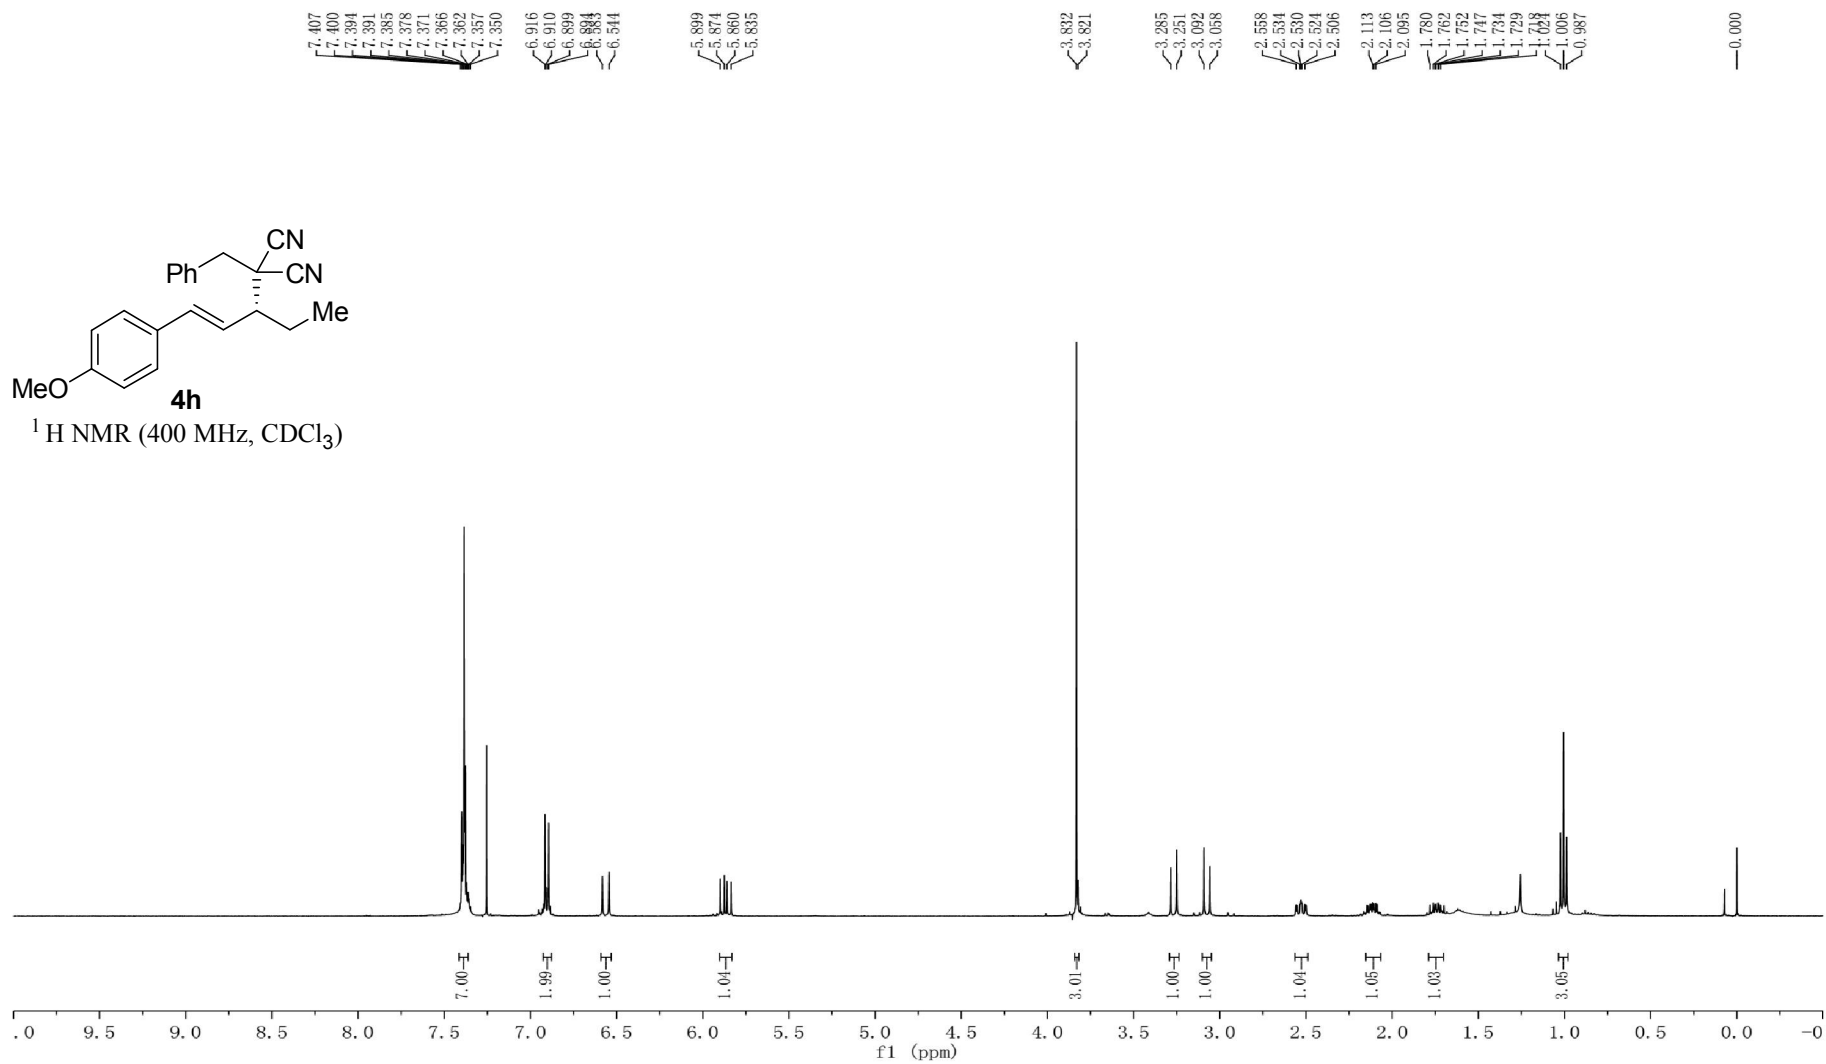

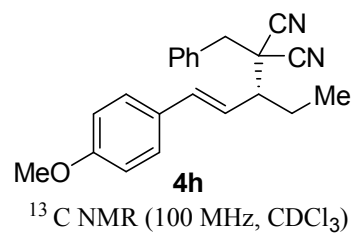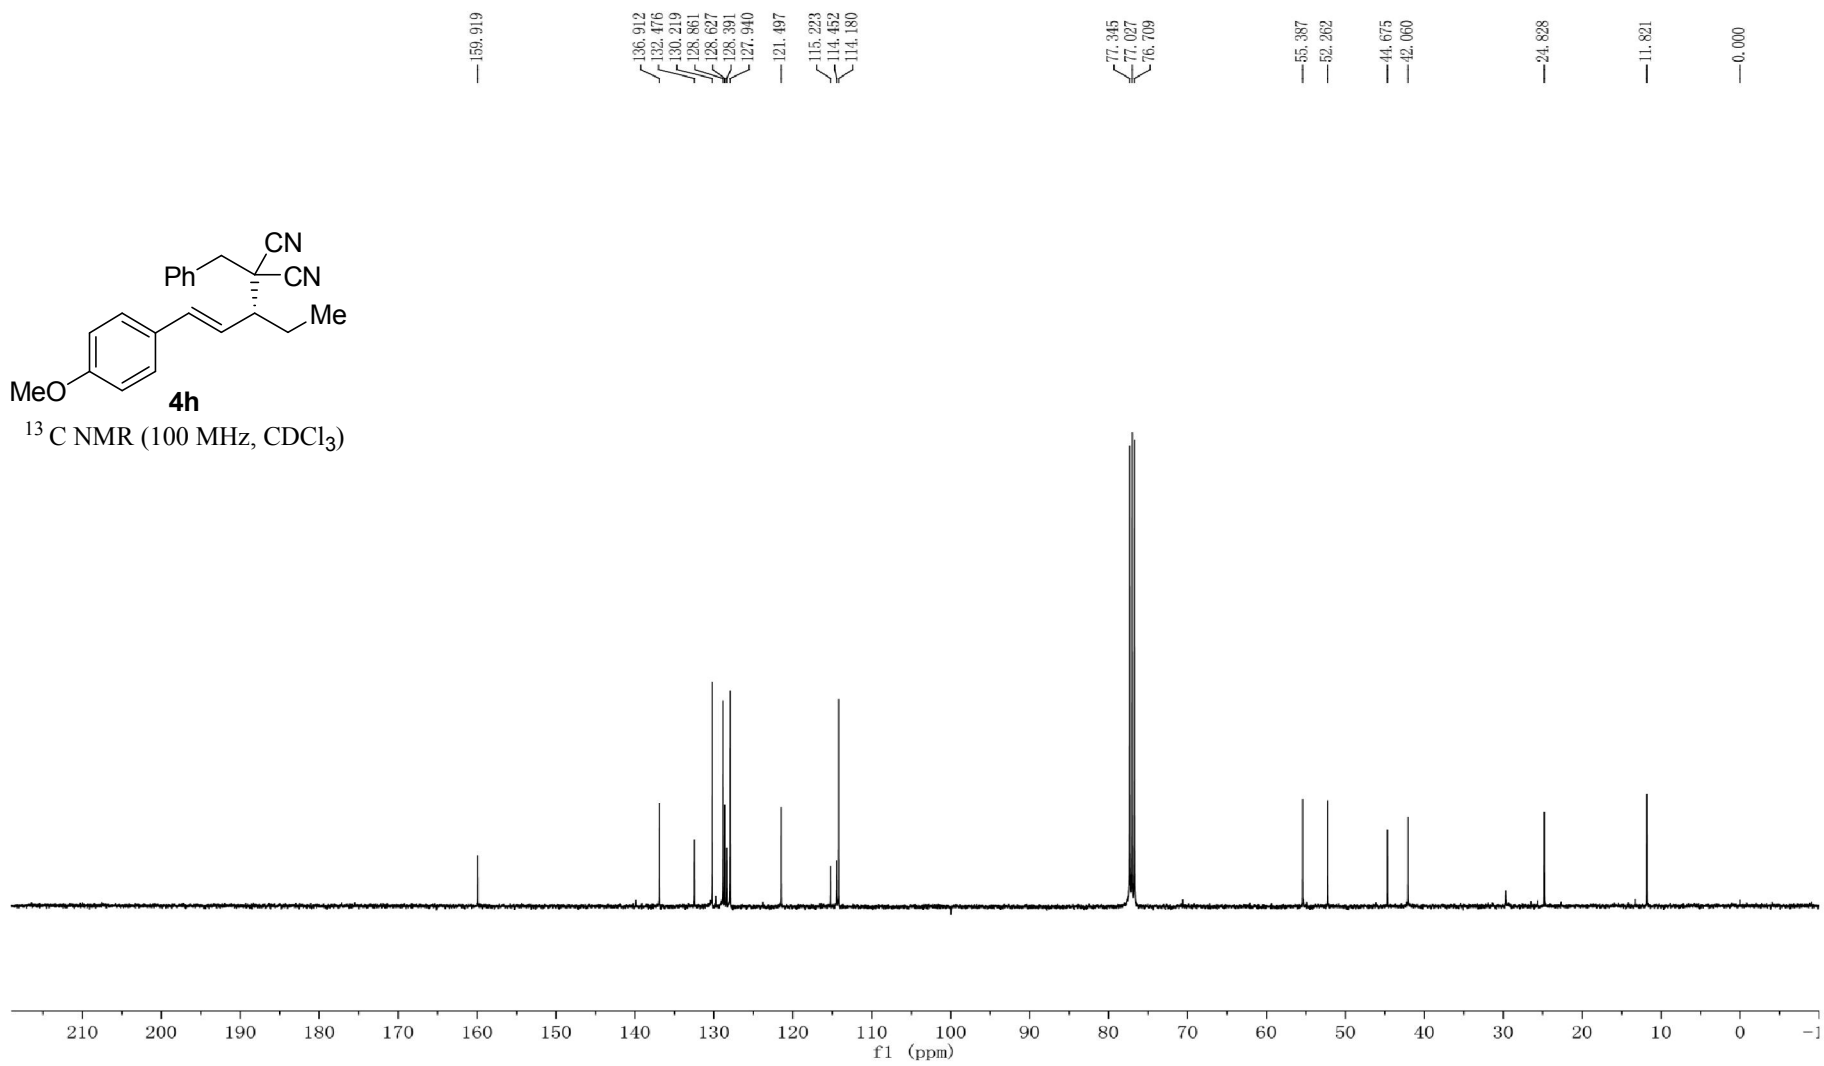

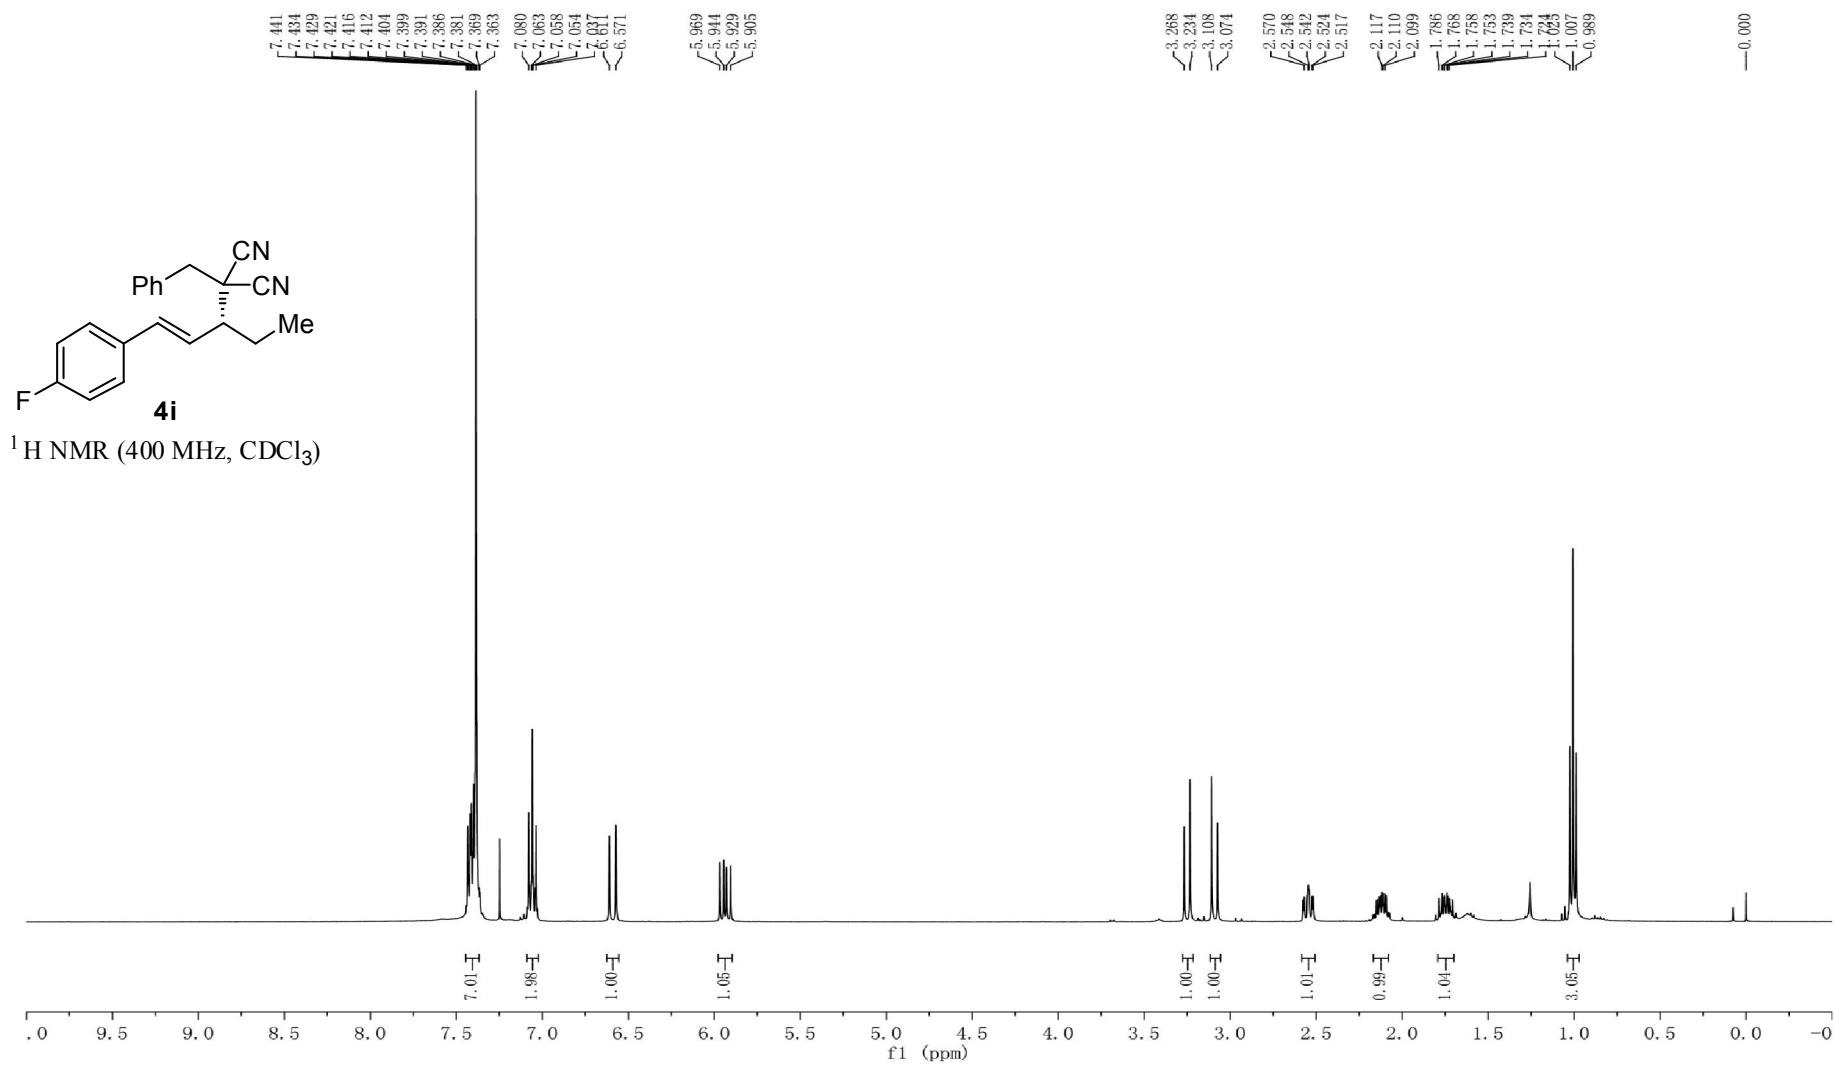

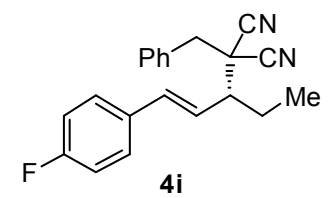

$^{13}\text{C}$  NMR (100 MHz,  $\text{CDCl}_3$ )

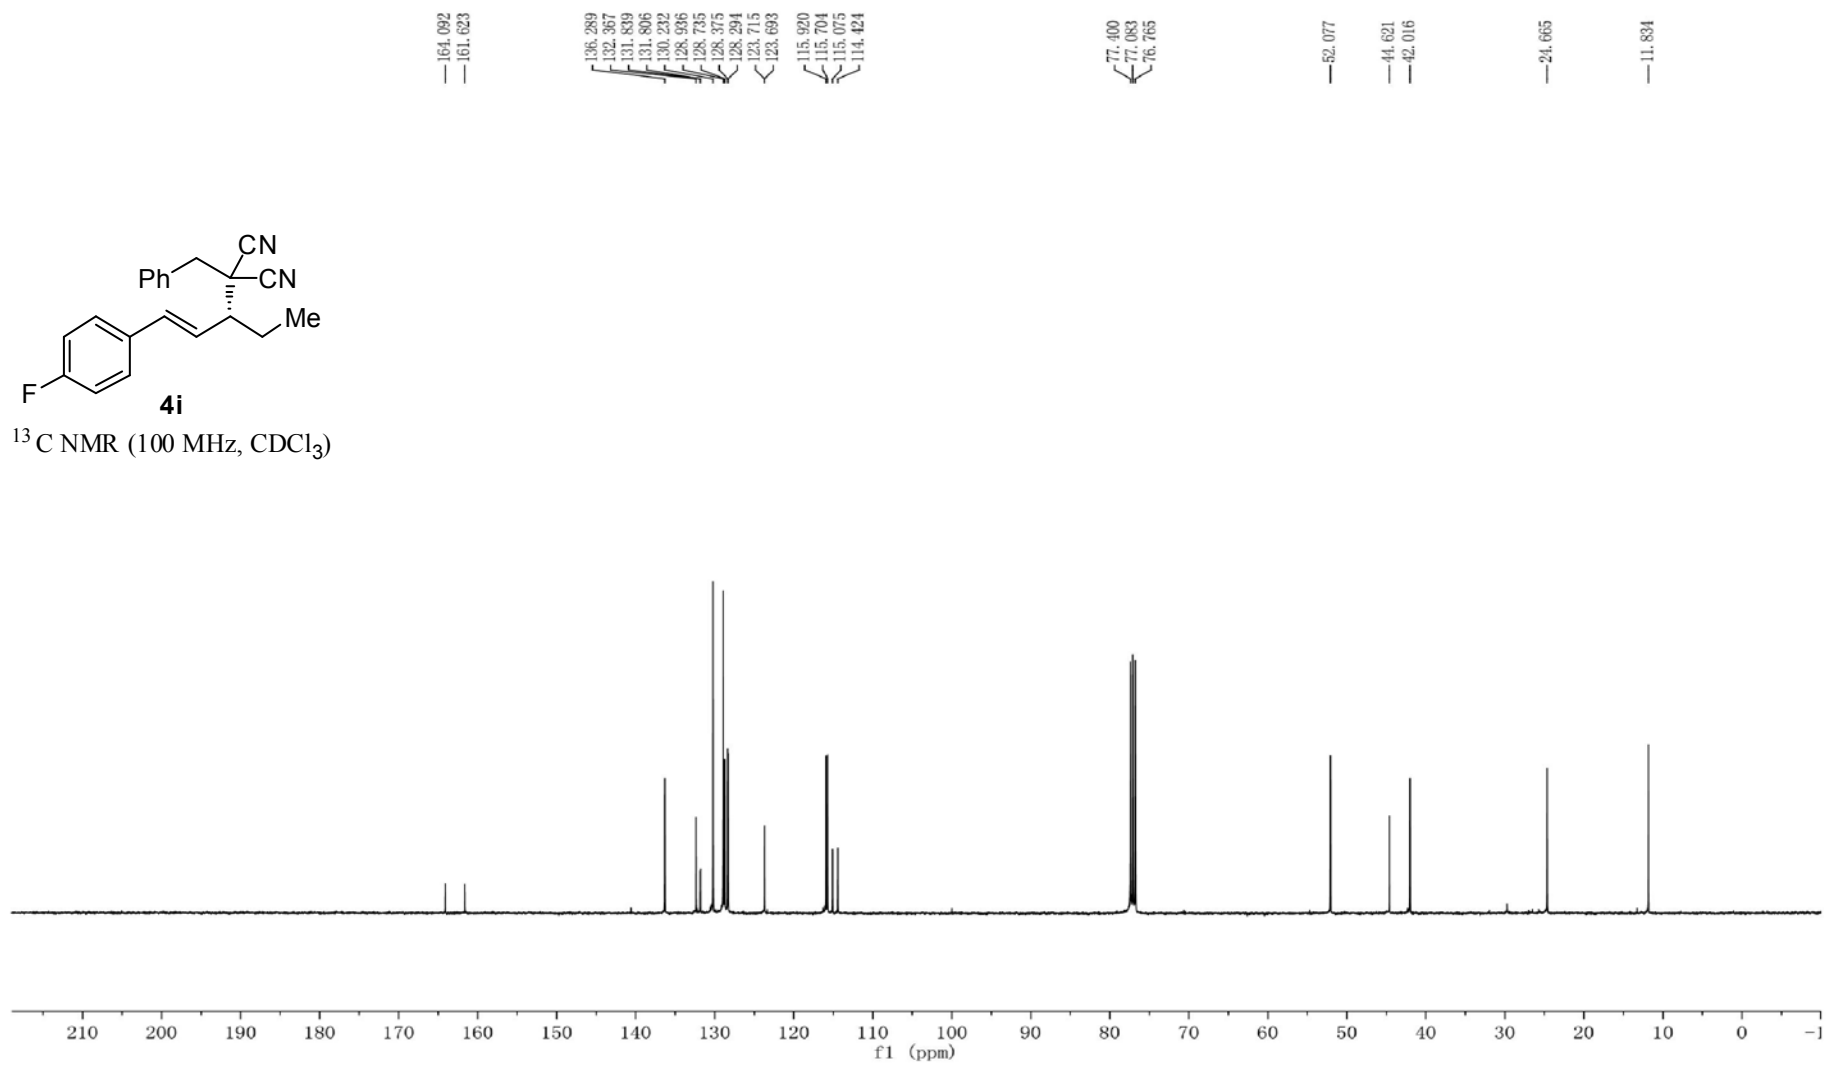

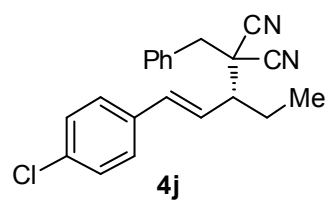

$^1\text{H NMR}$  (400 MHz,  $\text{CDCl}_3$ )

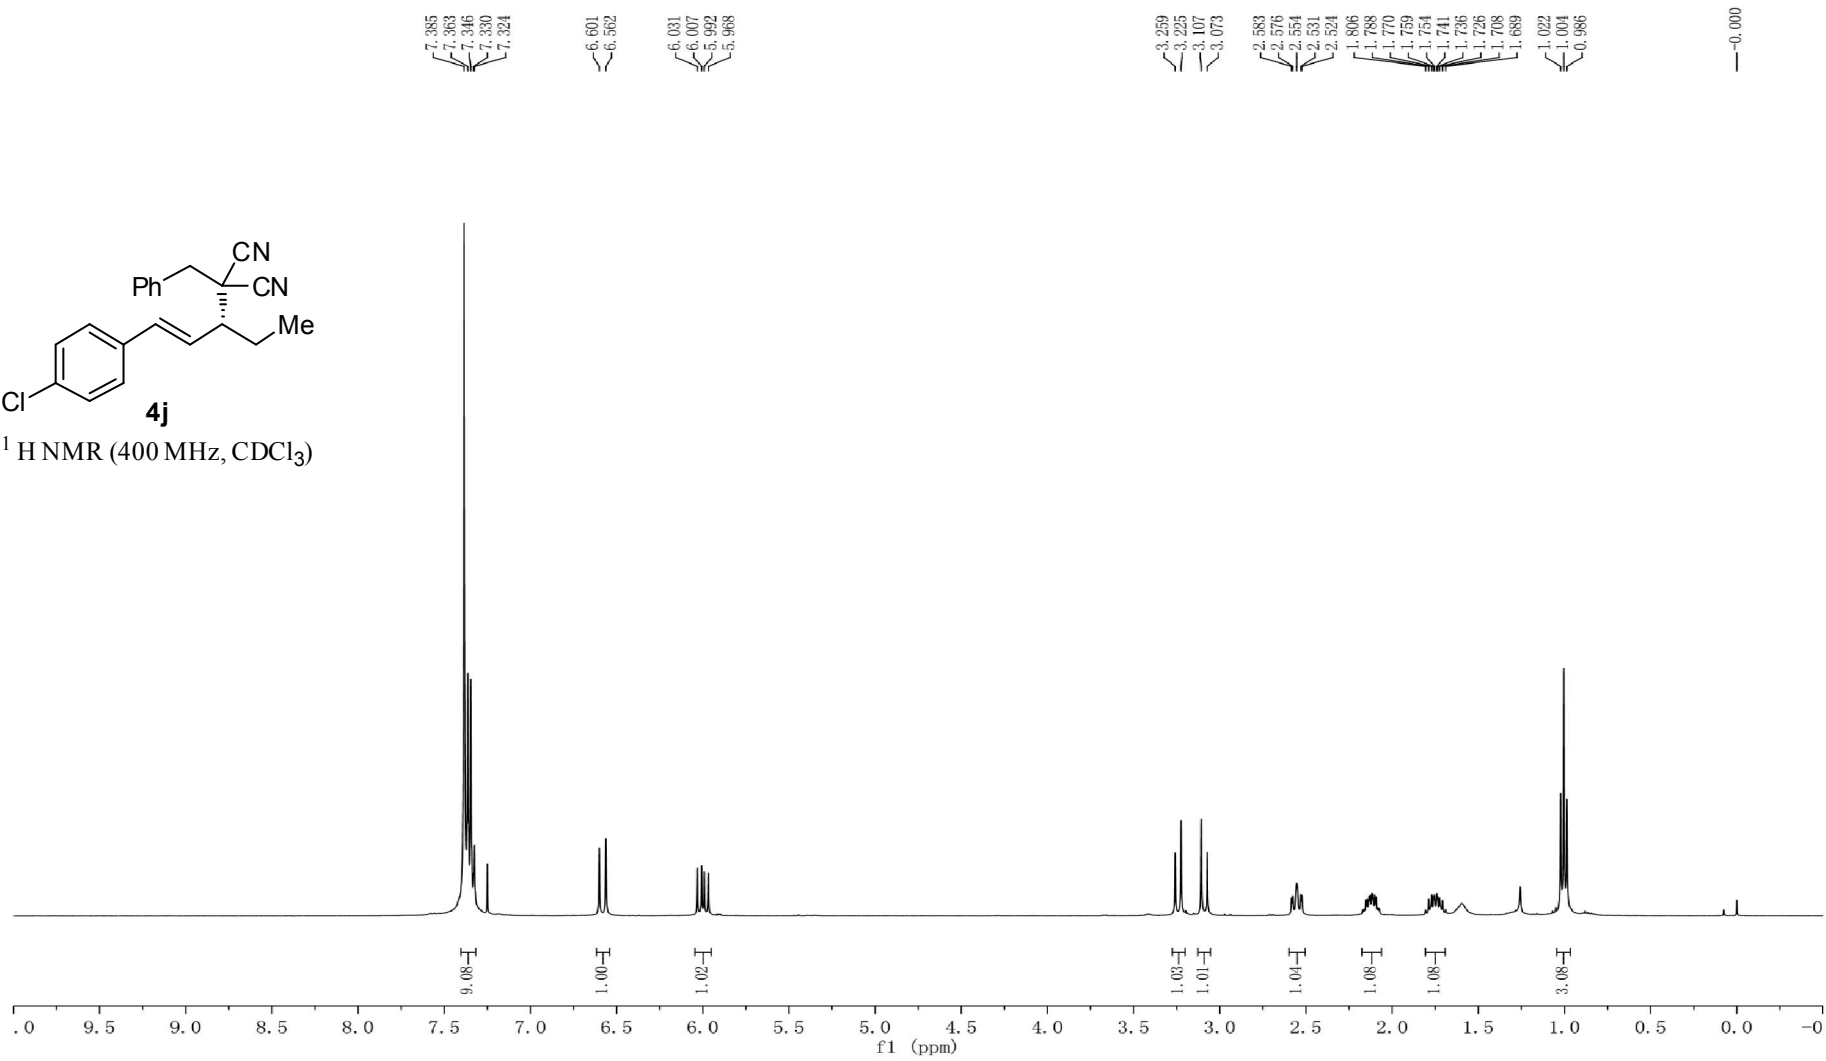

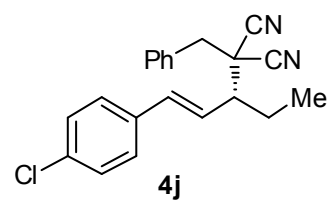

<sup>13</sup>C NMR (100 MHz, CDCl<sub>3</sub>)

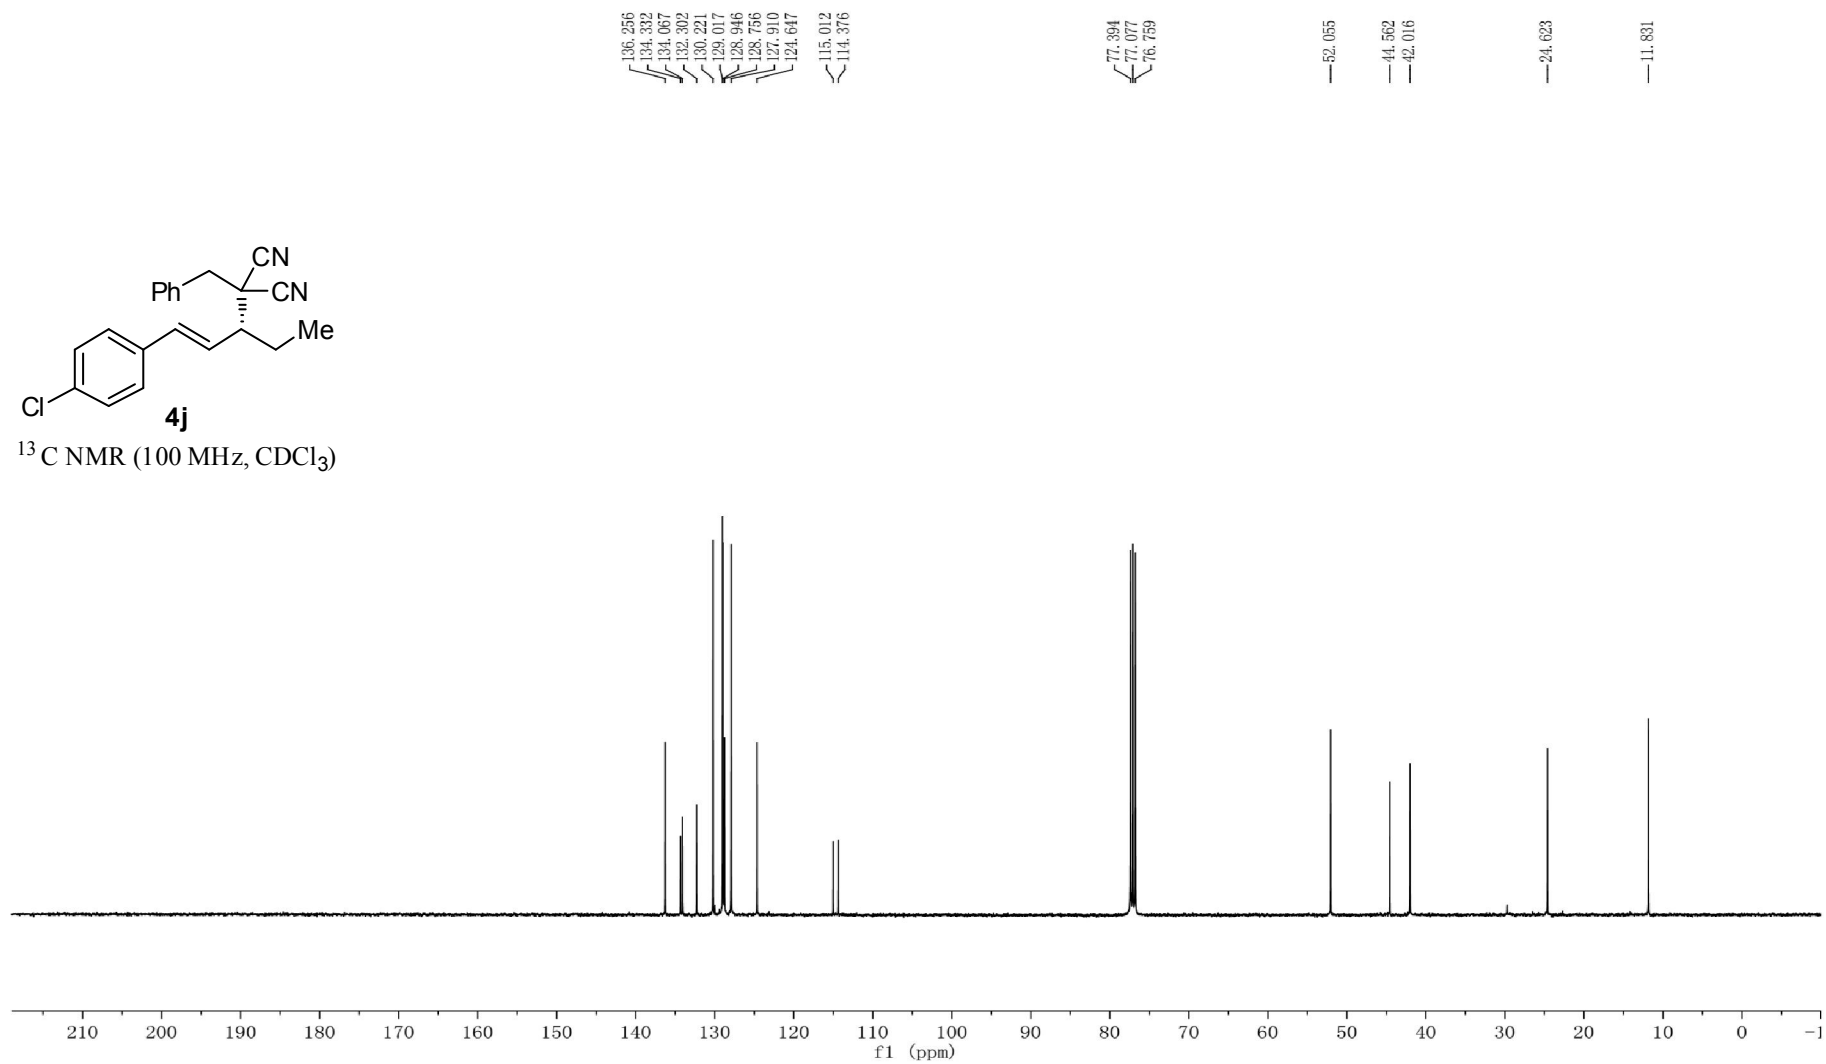



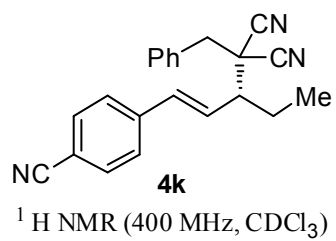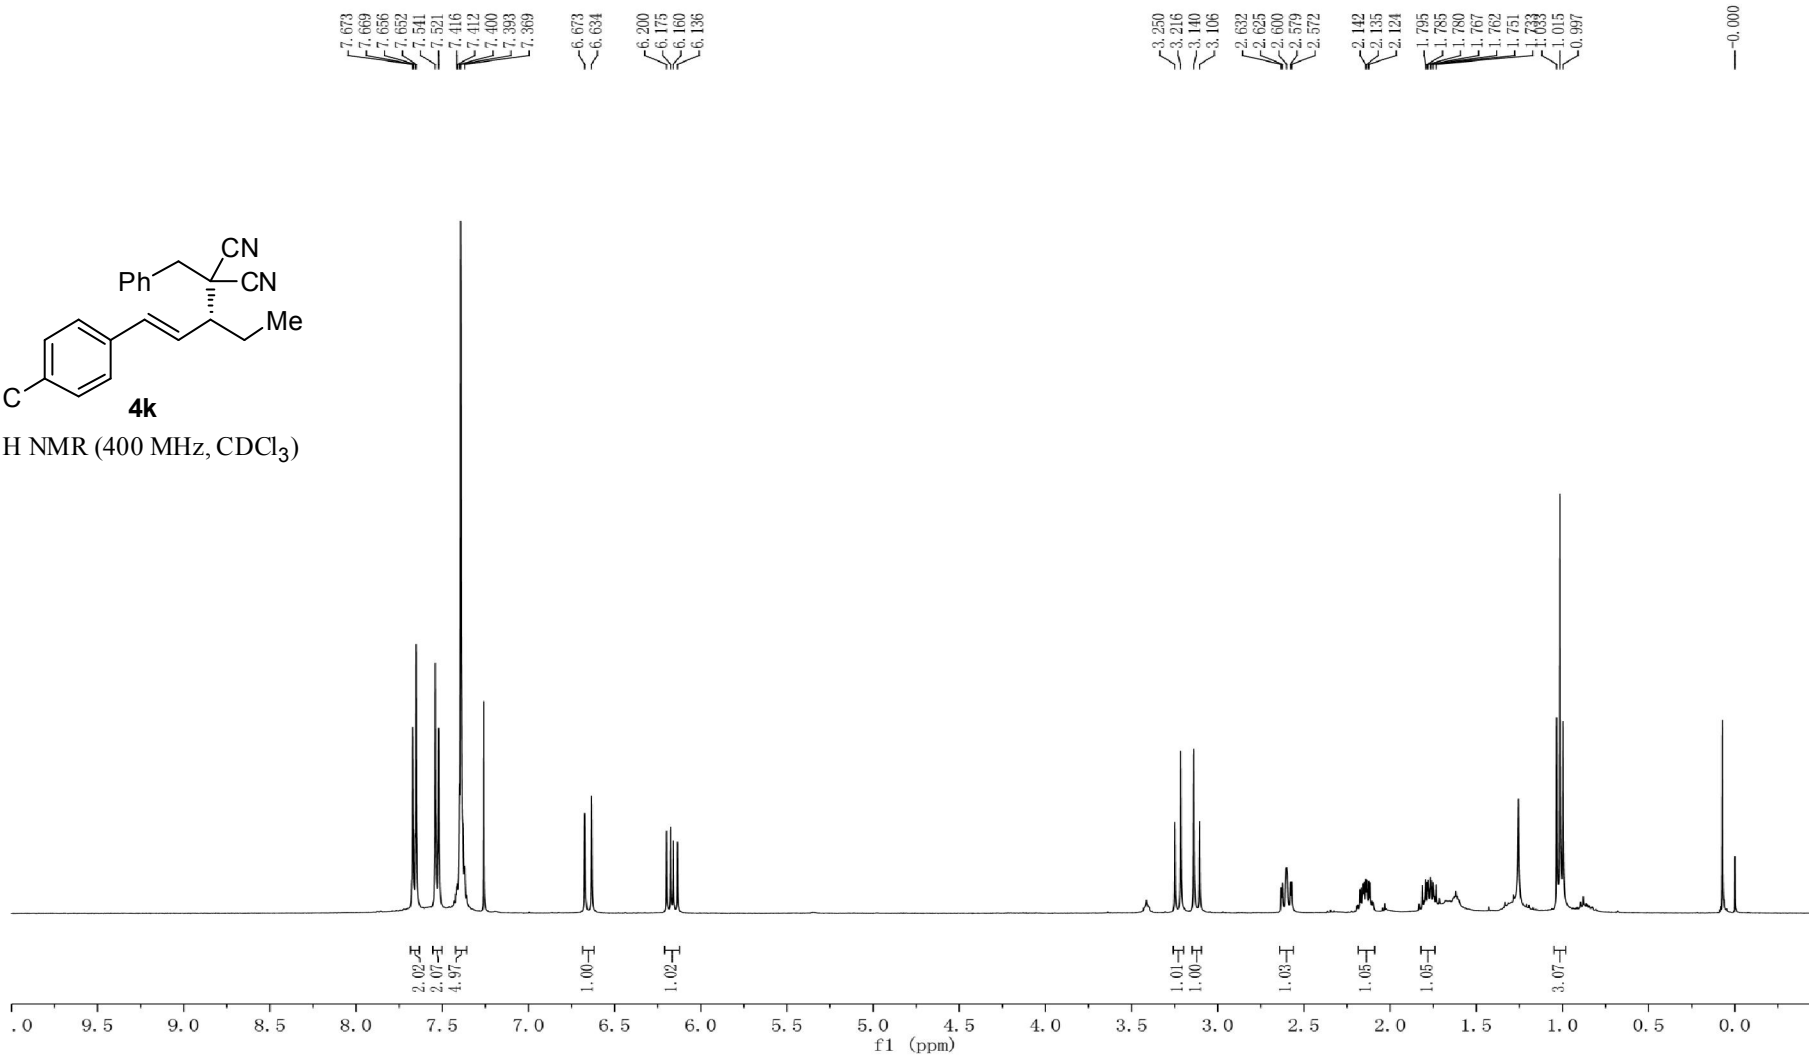

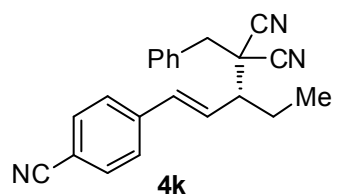

$^{13}\text{C}$  NMR (100 MHz,  $\text{CDCl}_3$ )

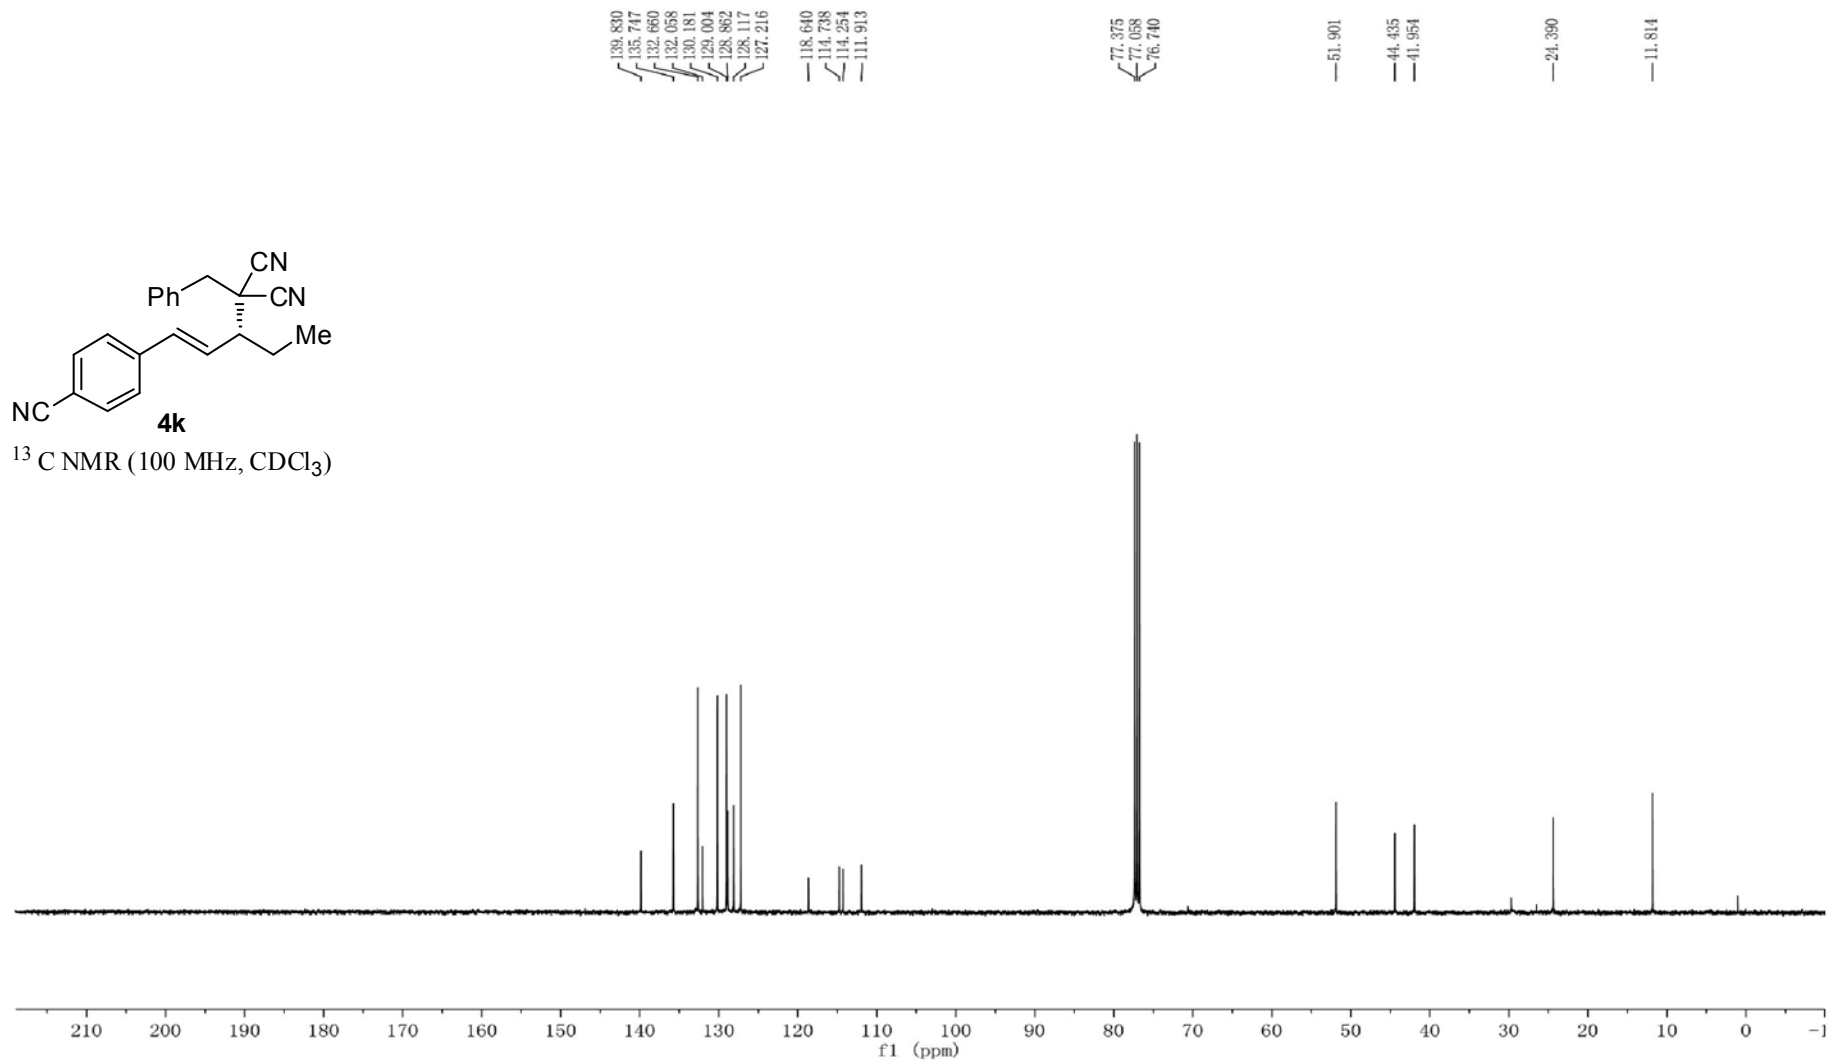

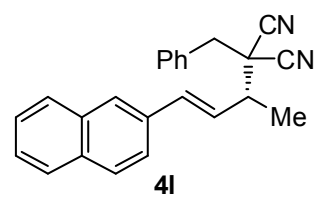

$^1\text{H NMR}$  (400 MHz,  $\text{CDCl}_3$ )

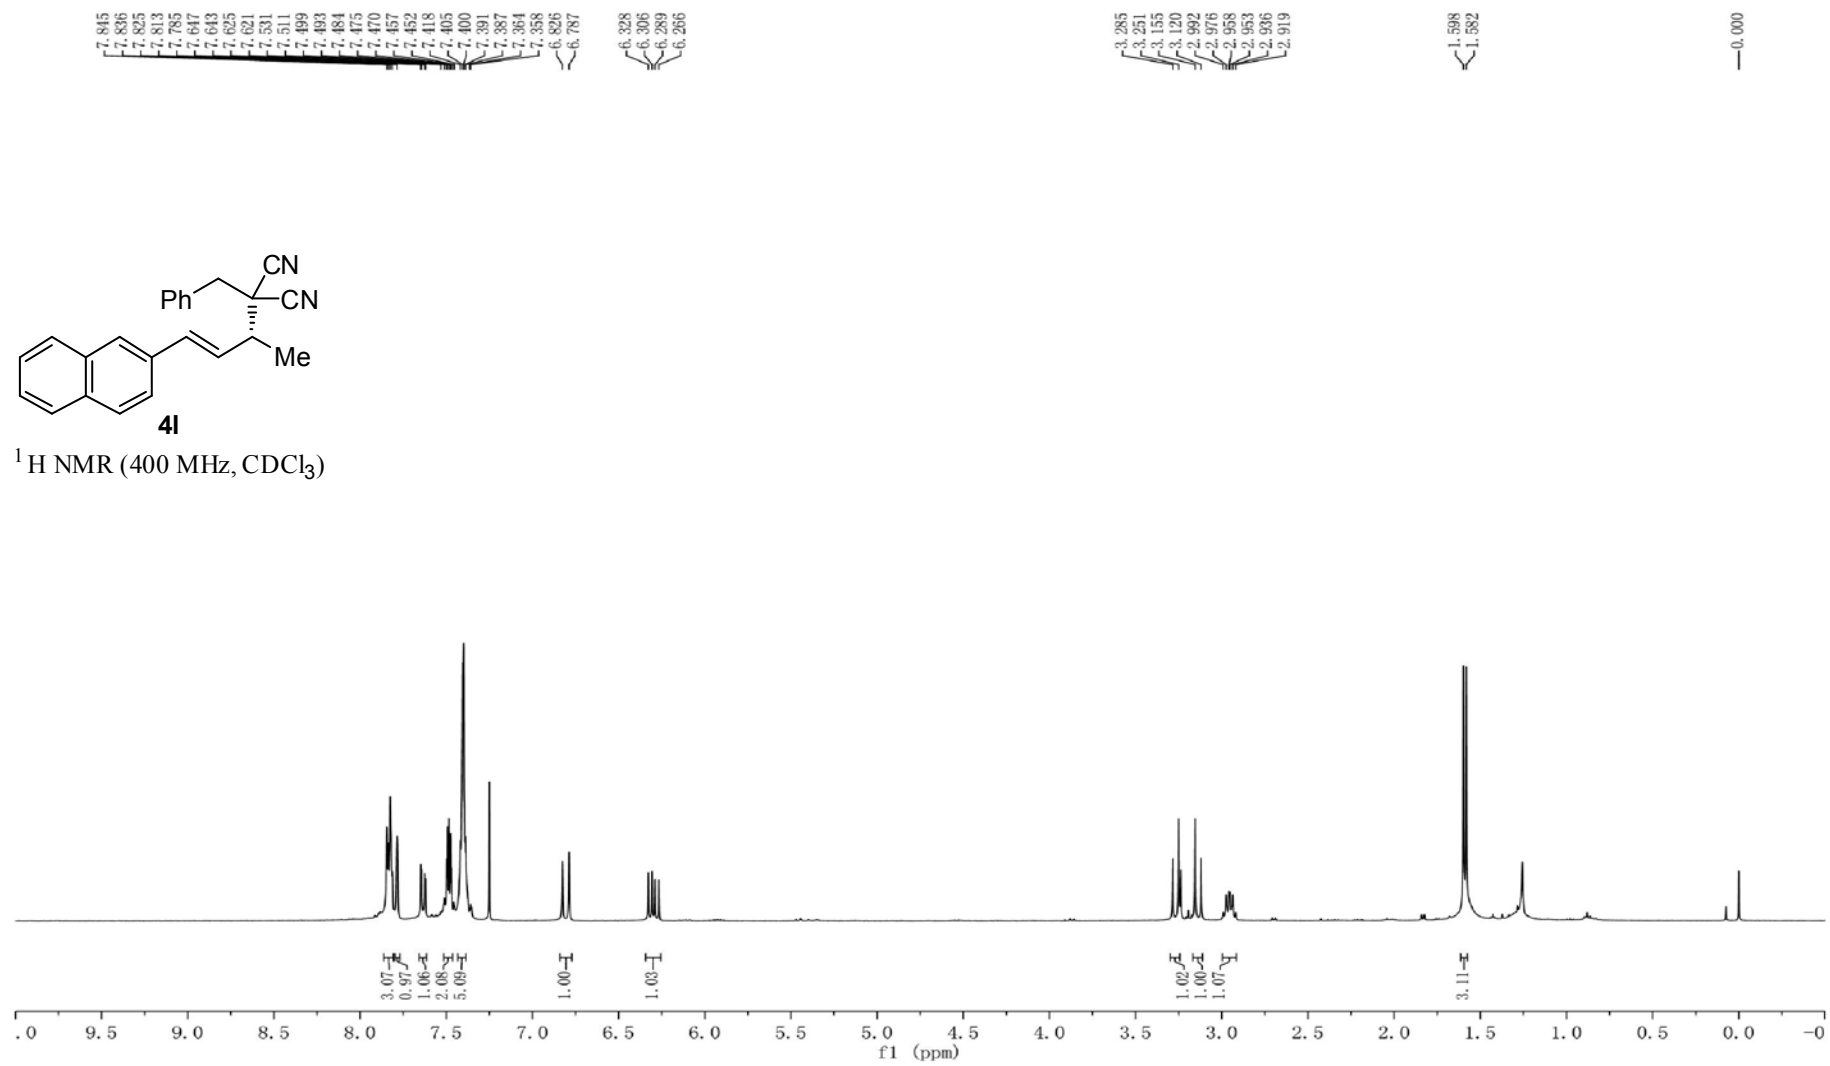

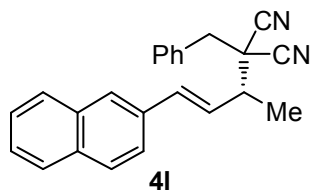

$^{13}\text{C}$  NMR (100 MHz,  $\text{CDCl}_3$ )

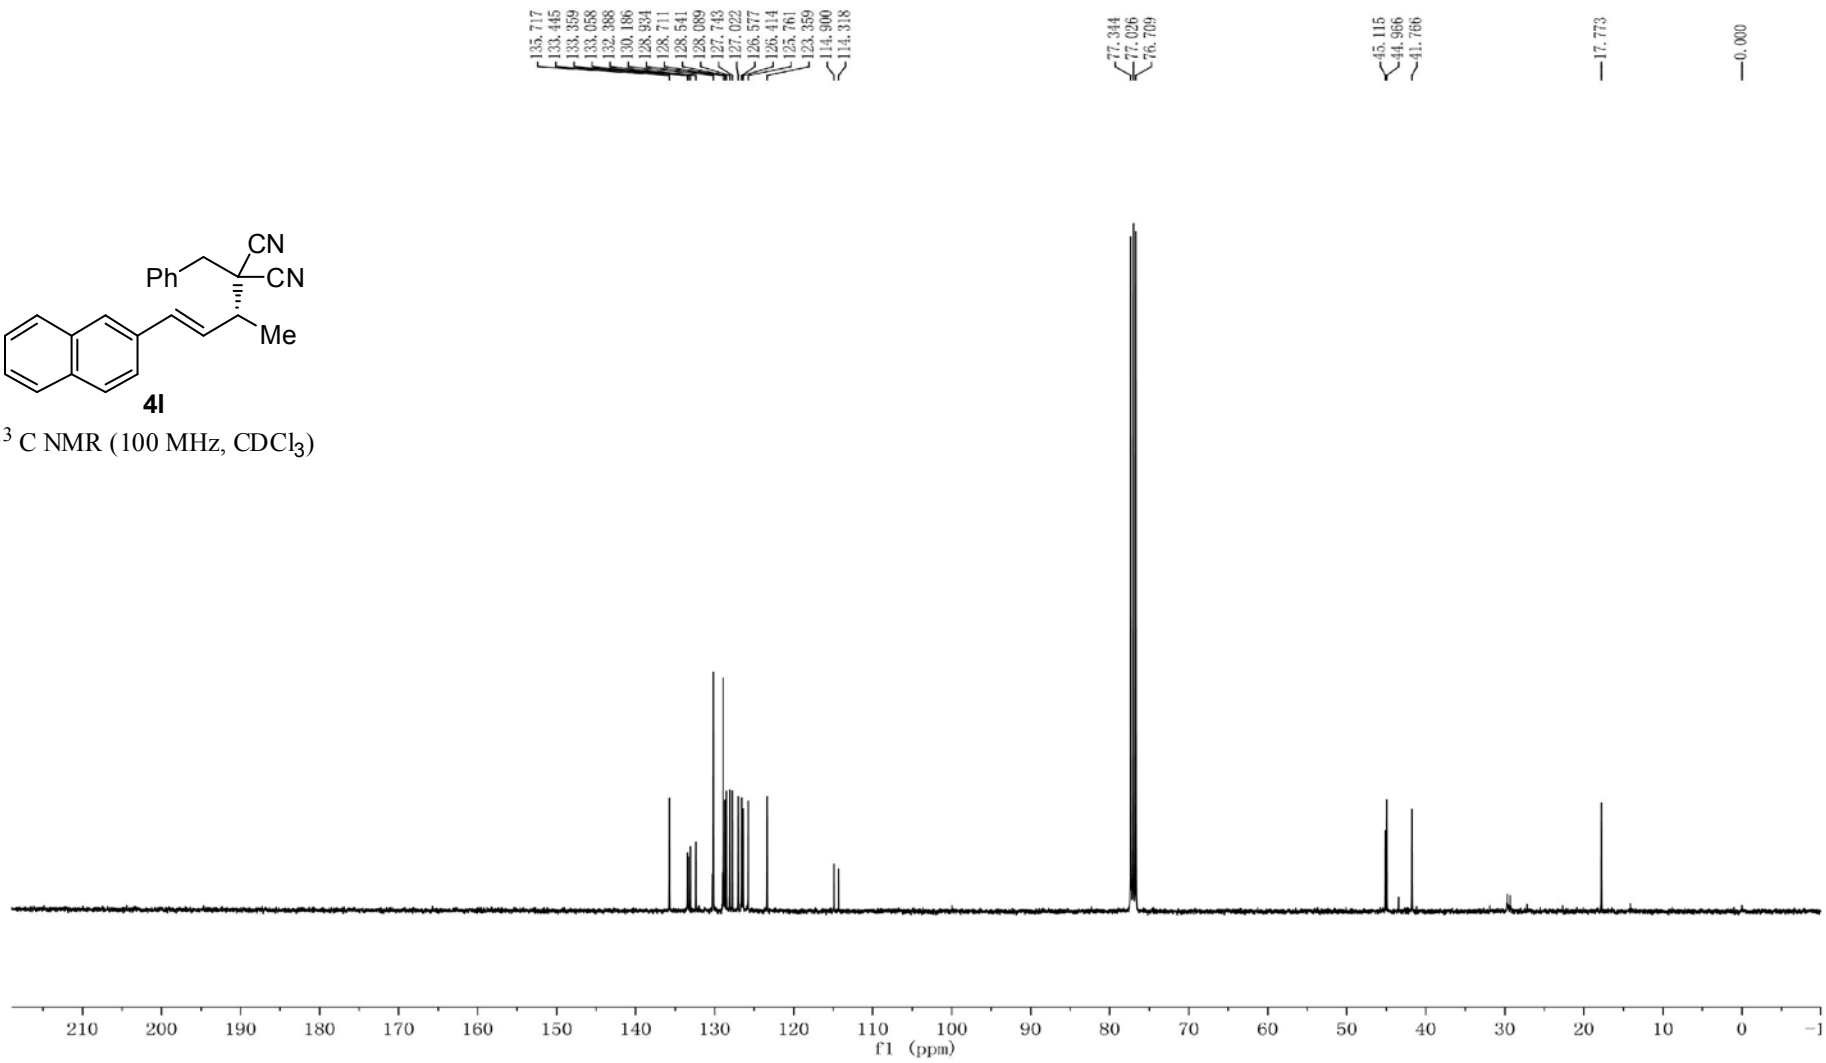

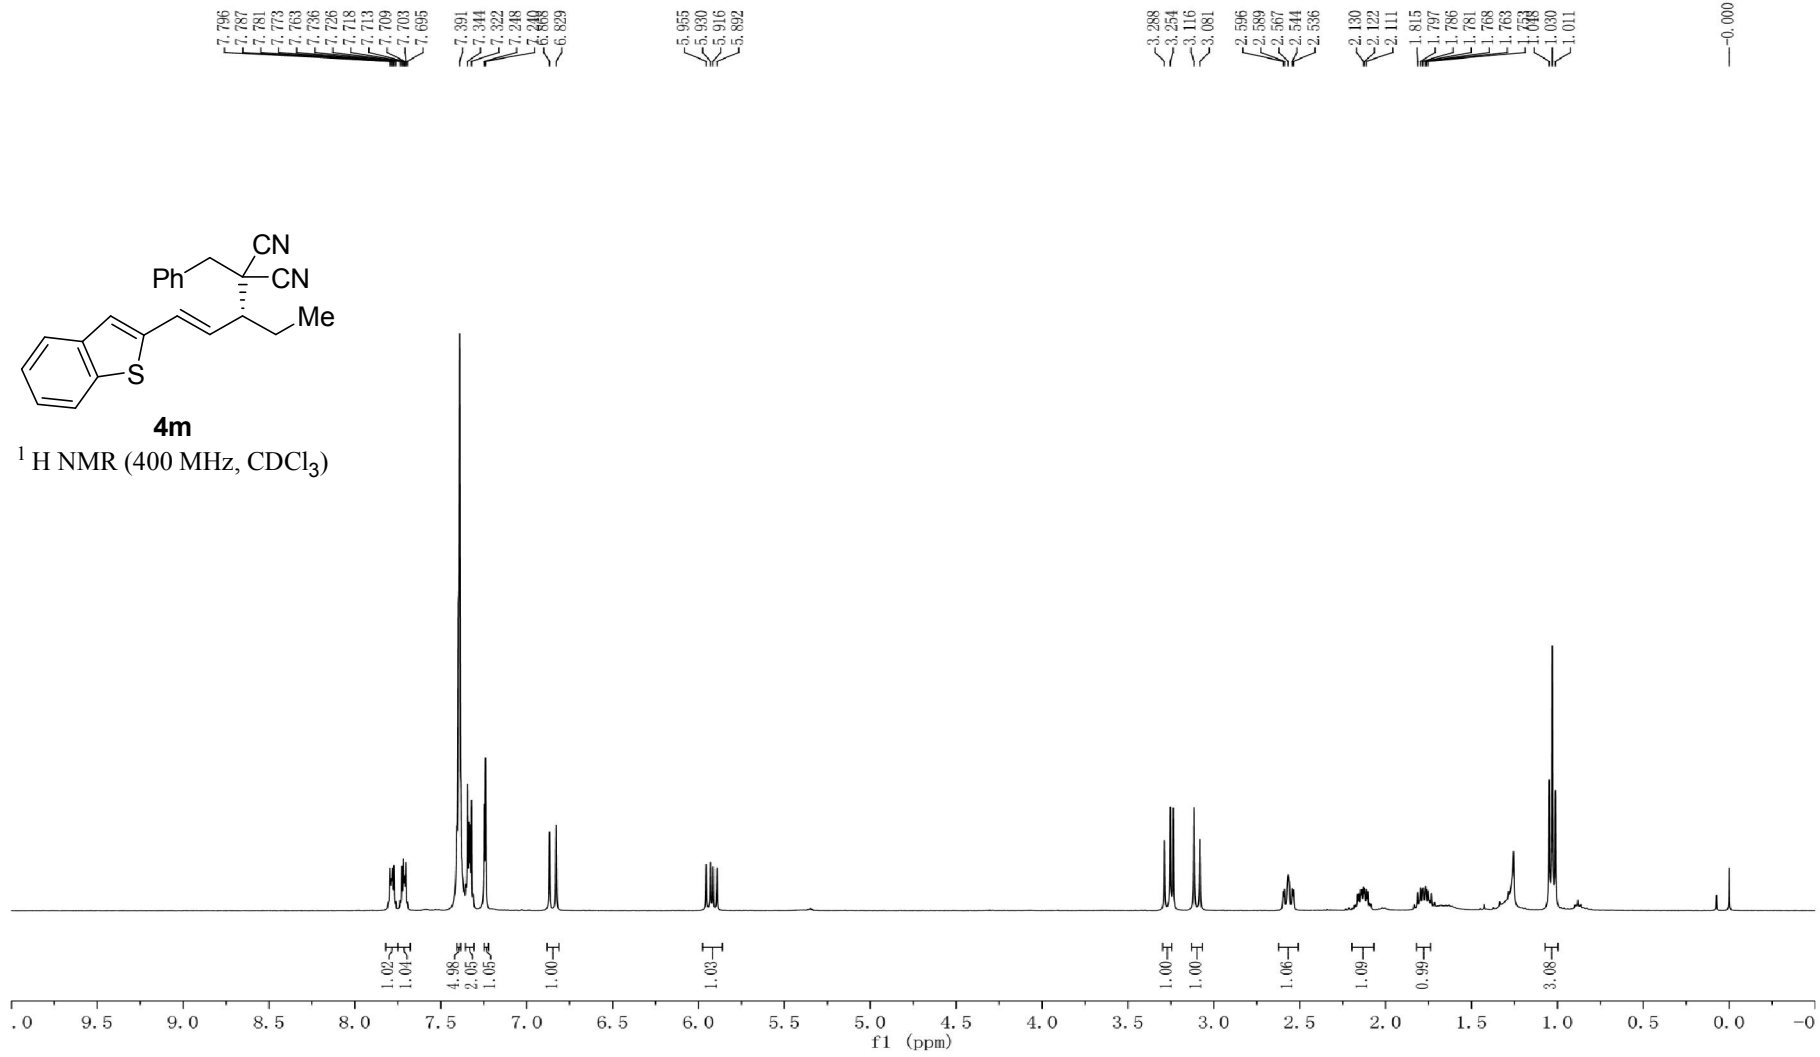

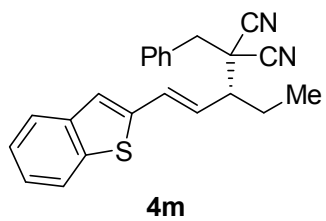

$^{13}\text{C}$  NMR (100 MHz,  $\text{CDCl}_3$ )

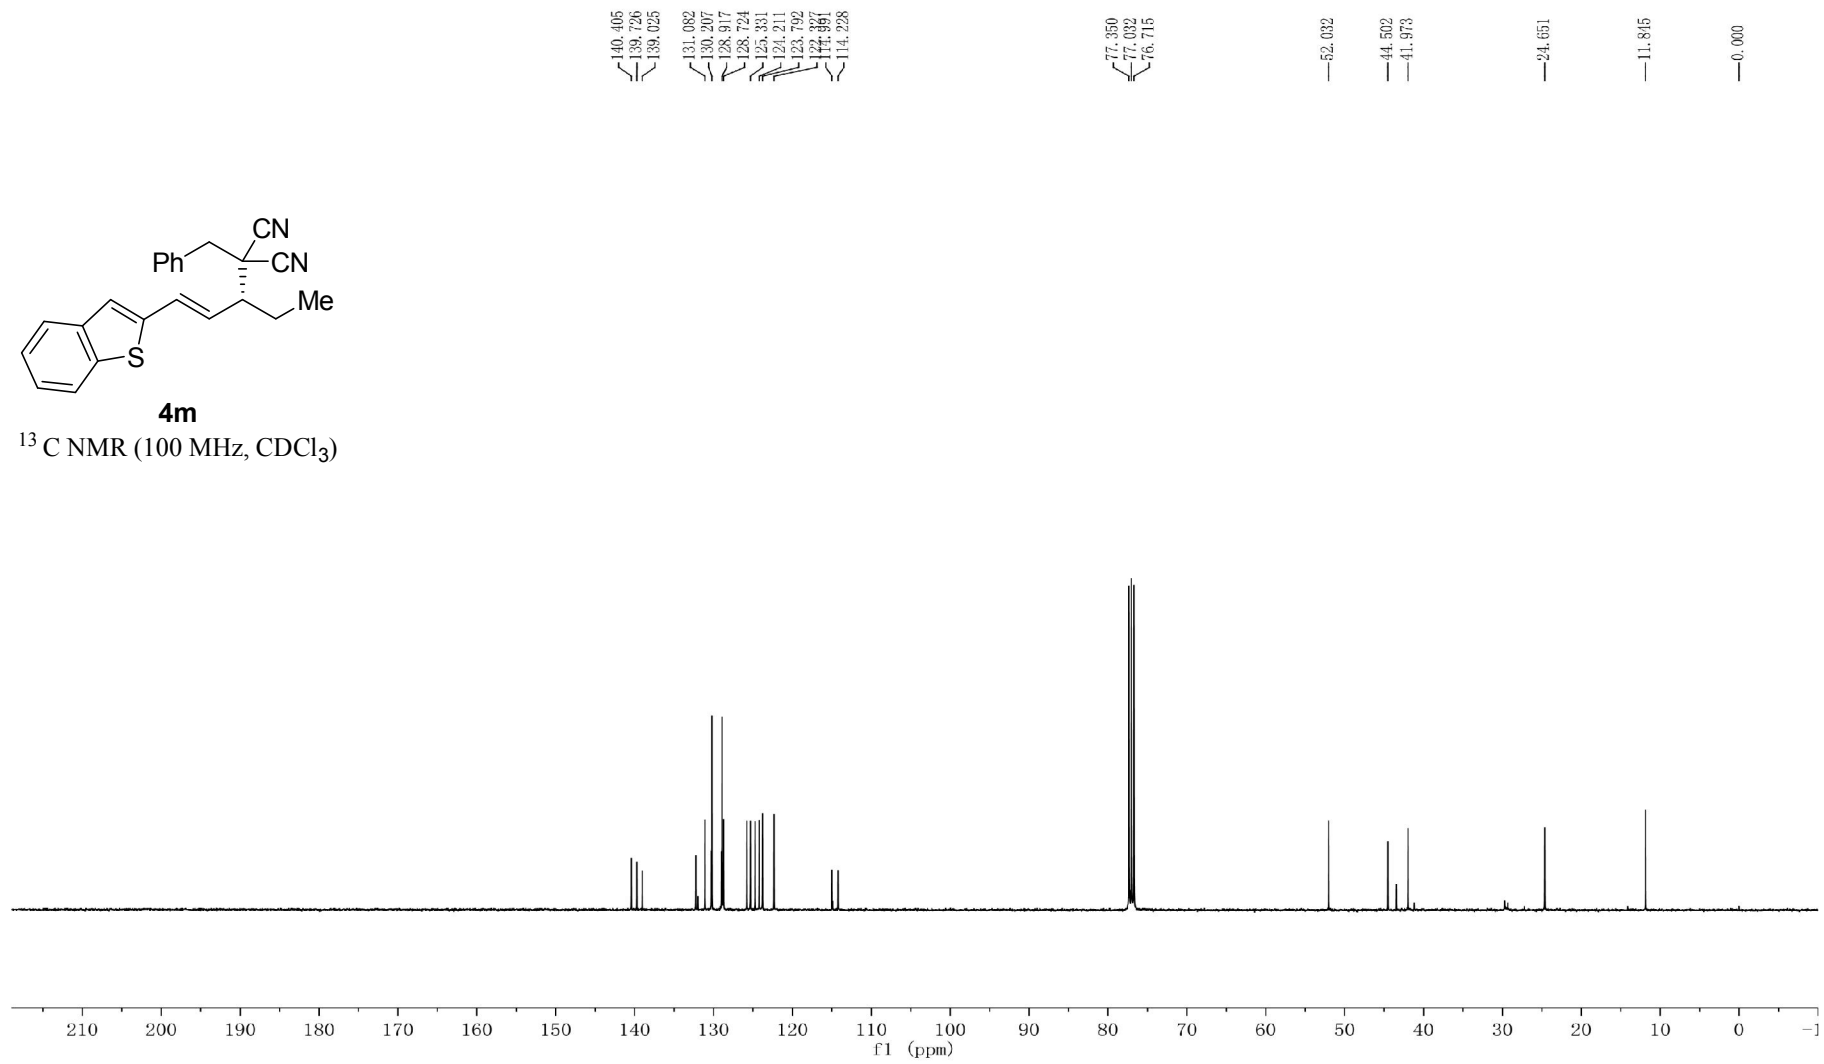

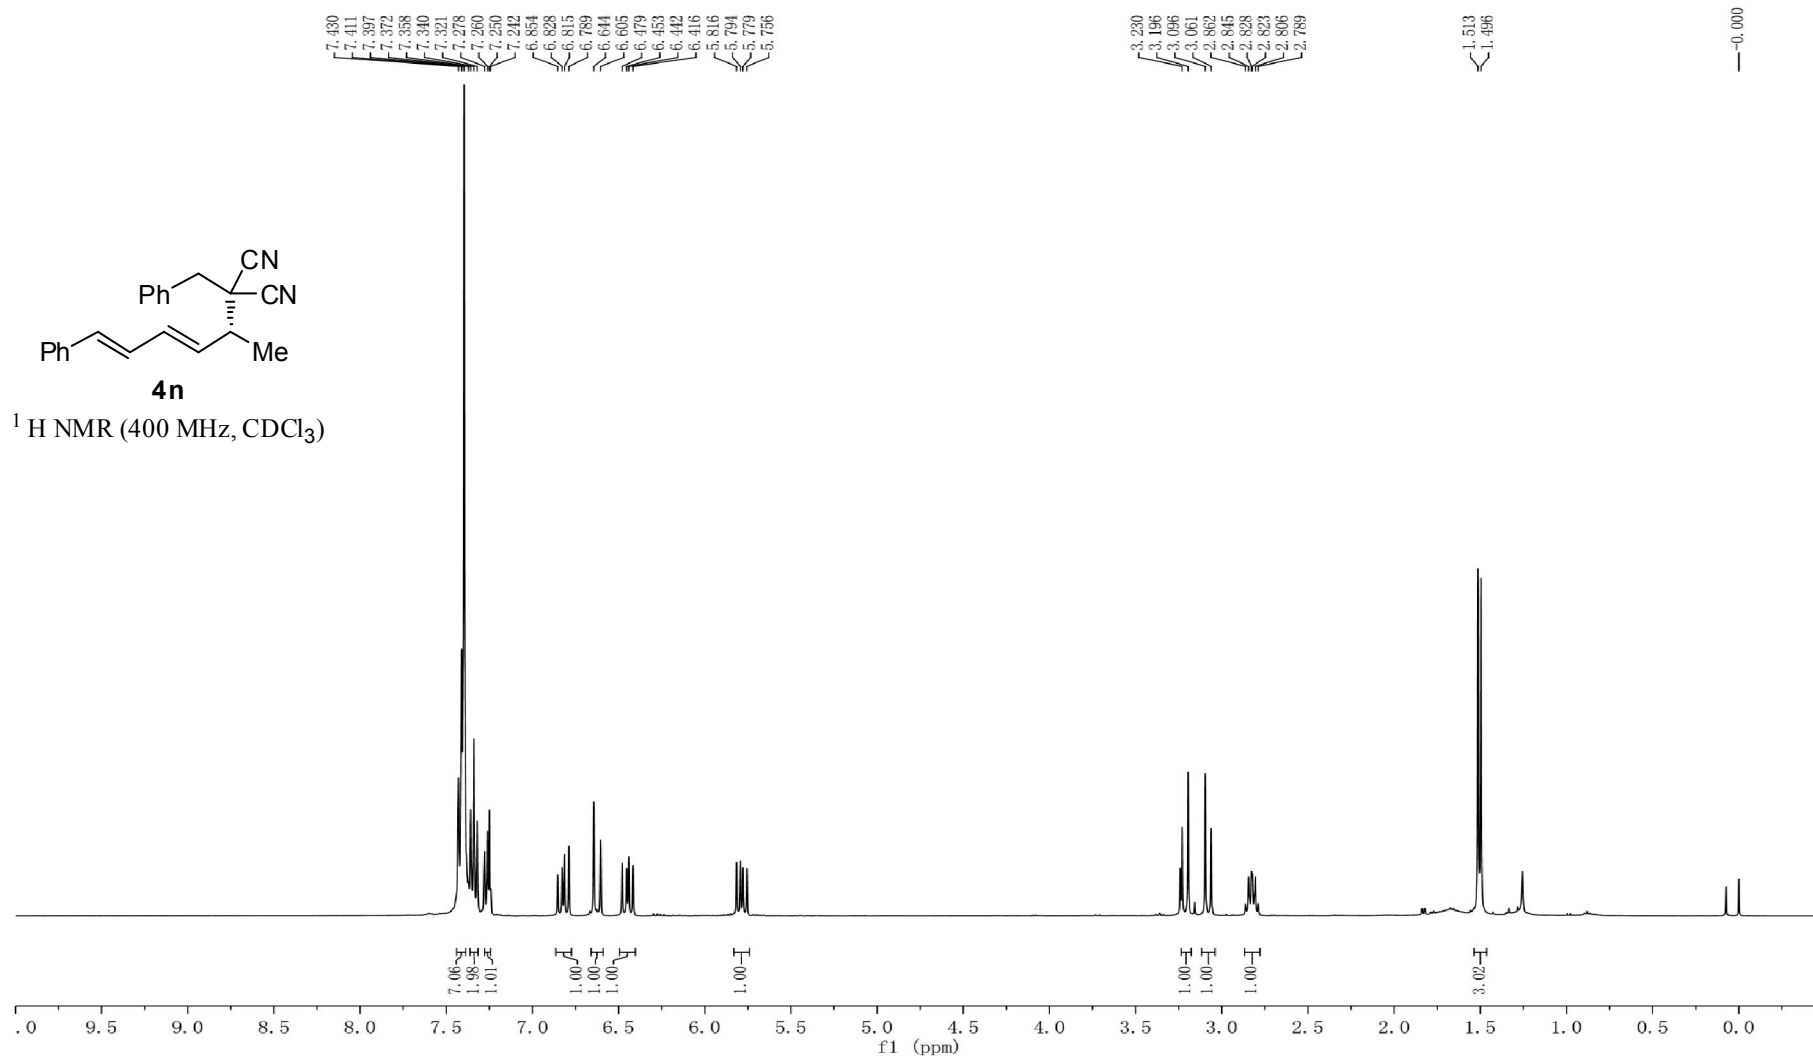

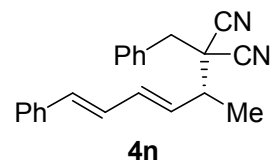

<sup>13</sup>C NMR (100 MHz, CDCl<sub>3</sub>)

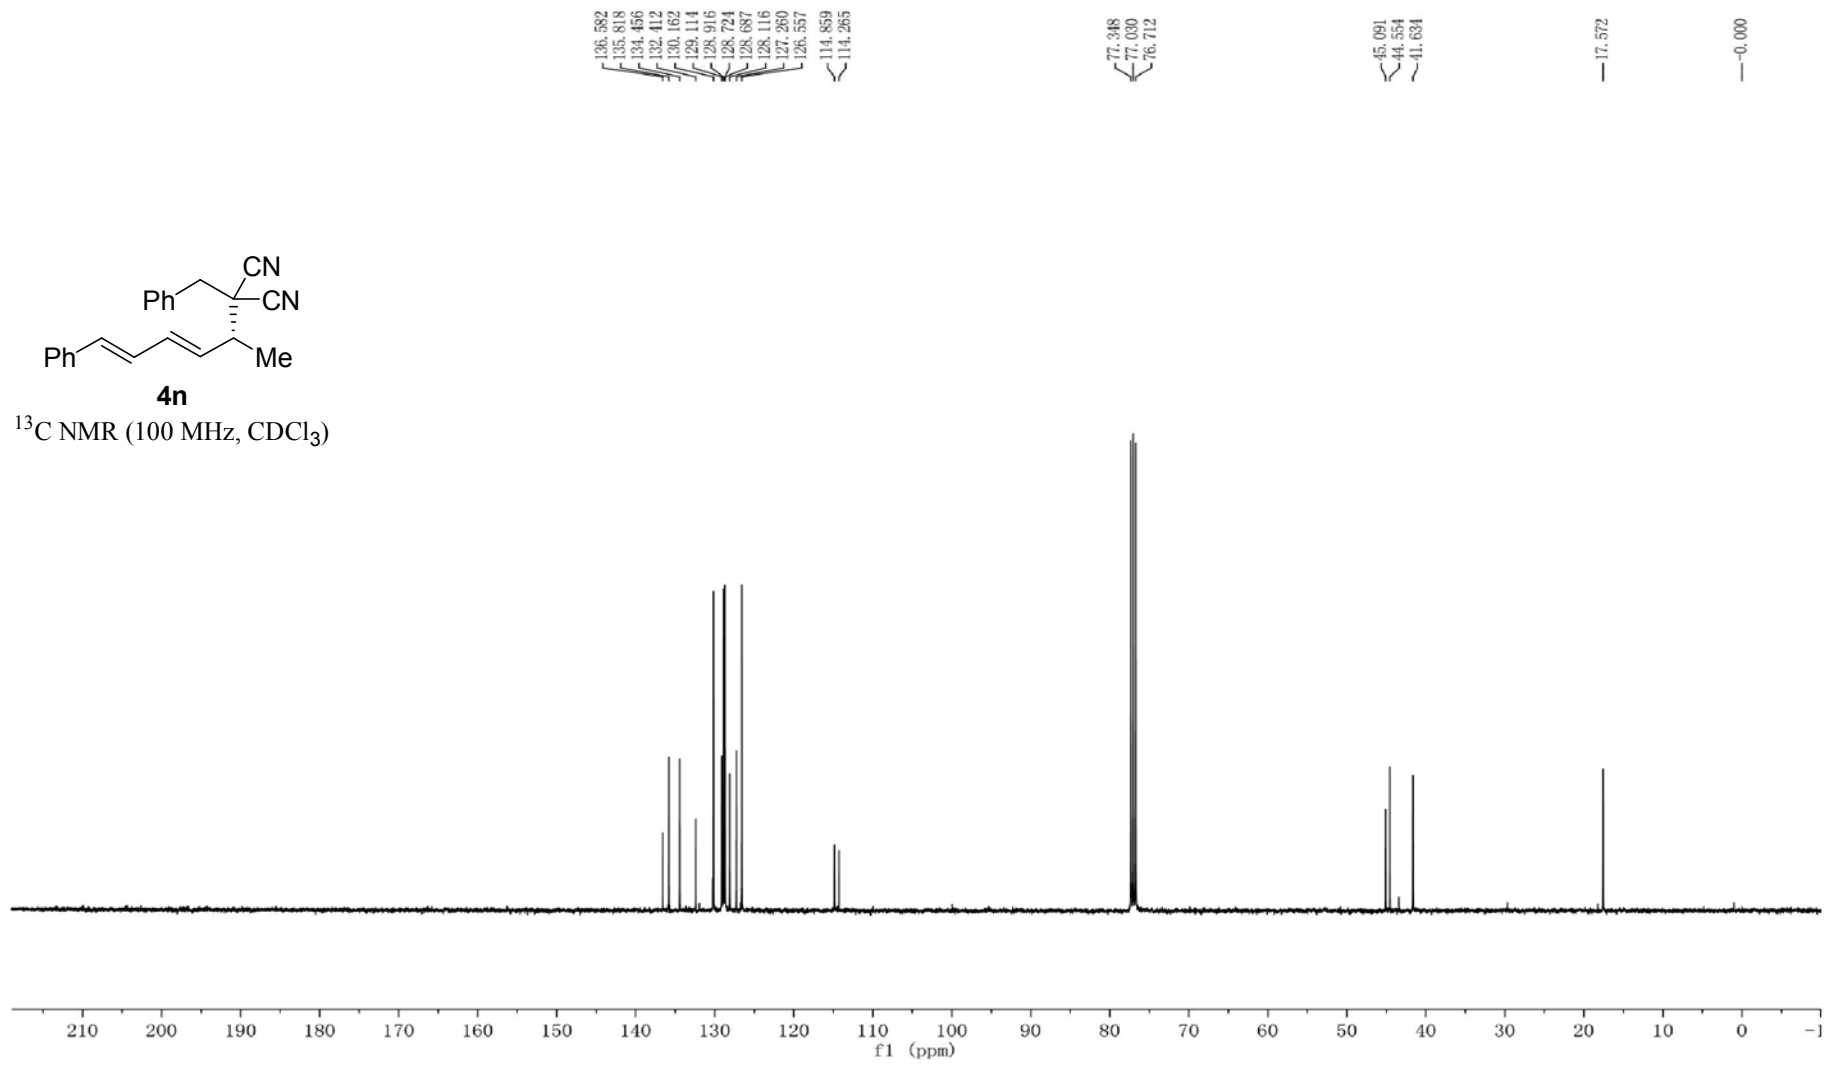



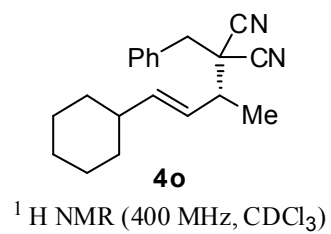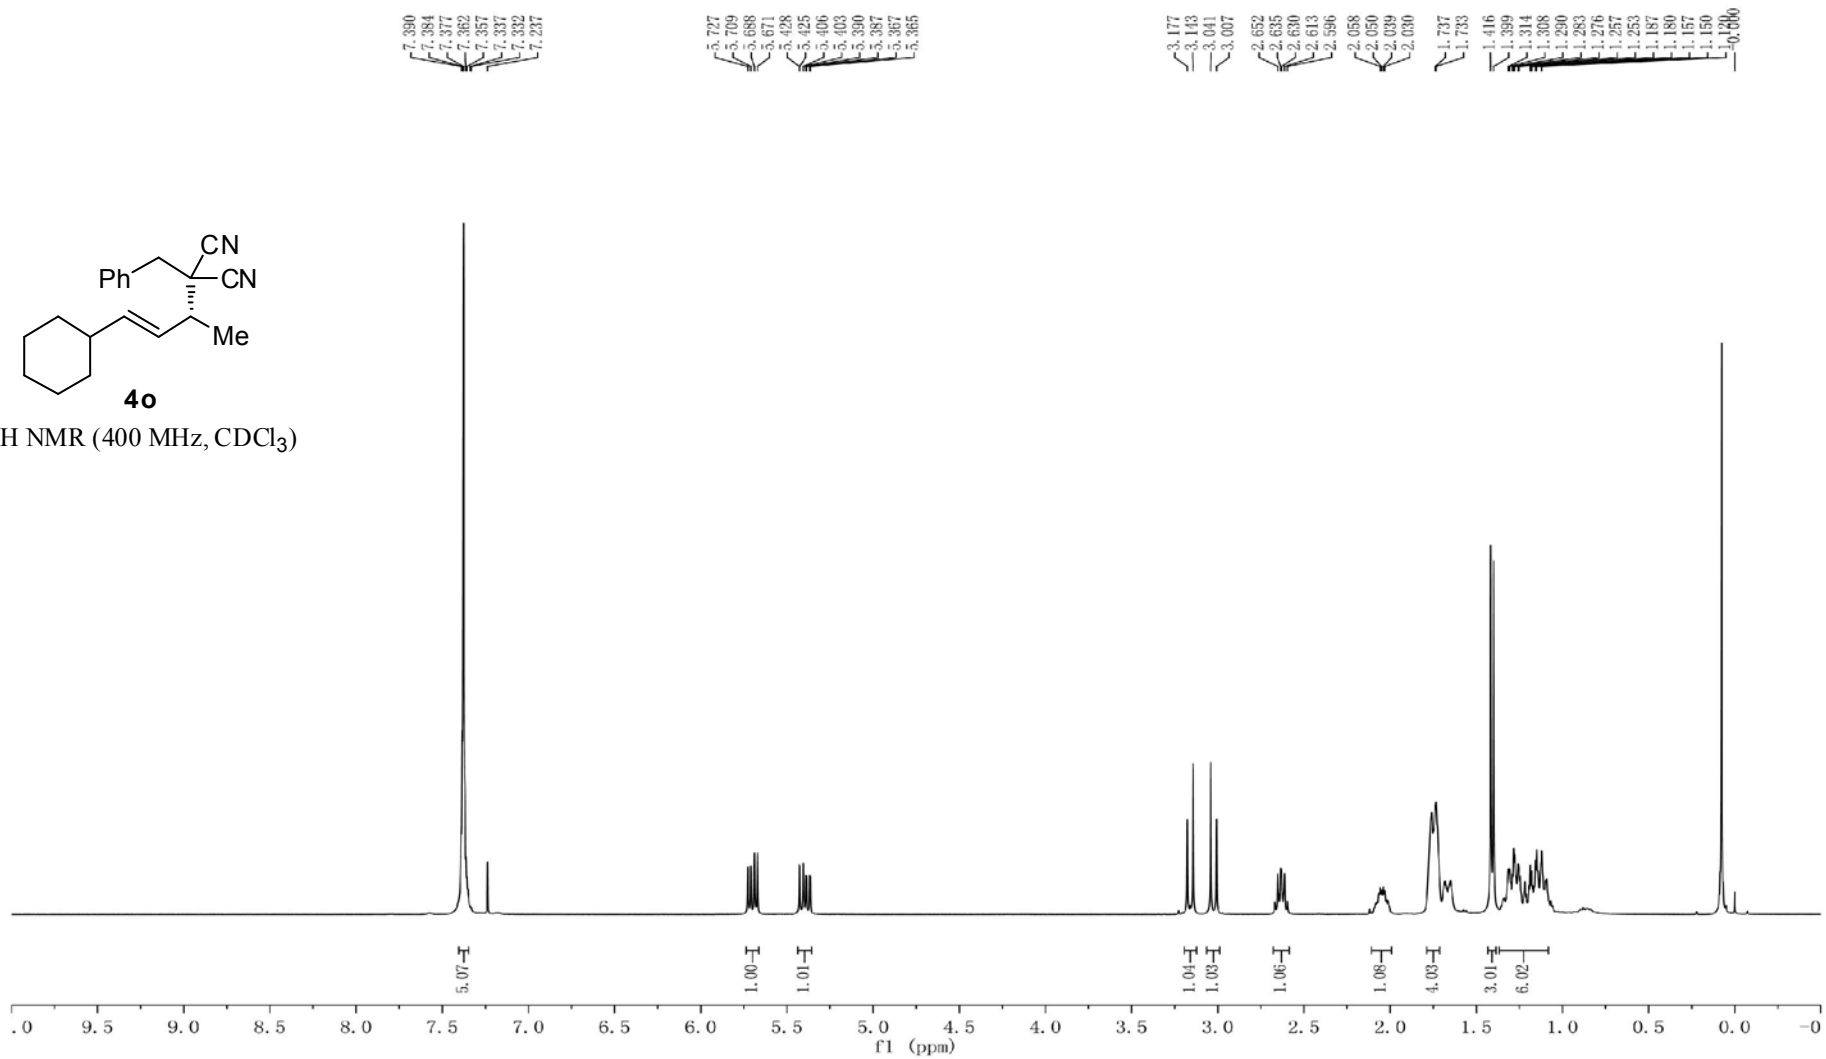

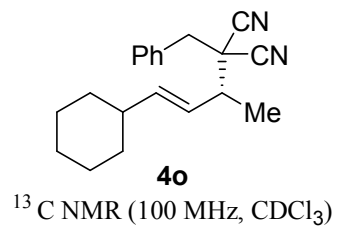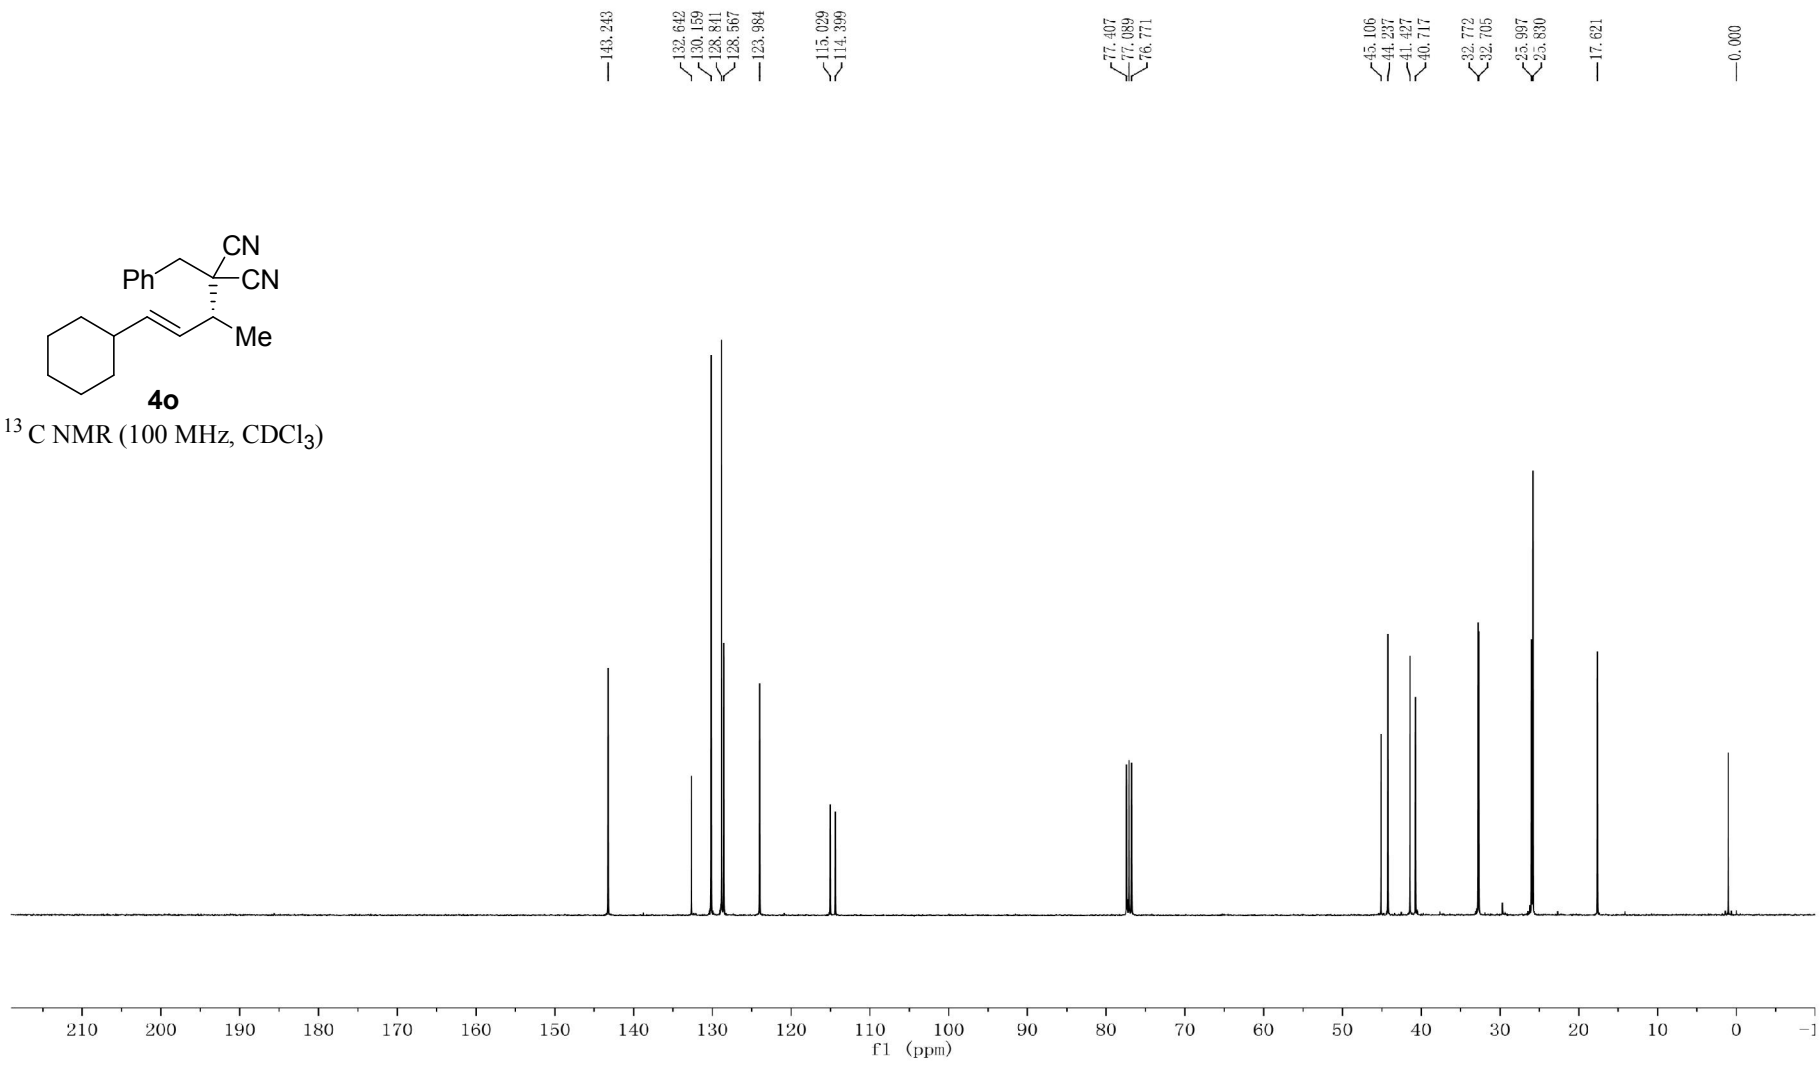

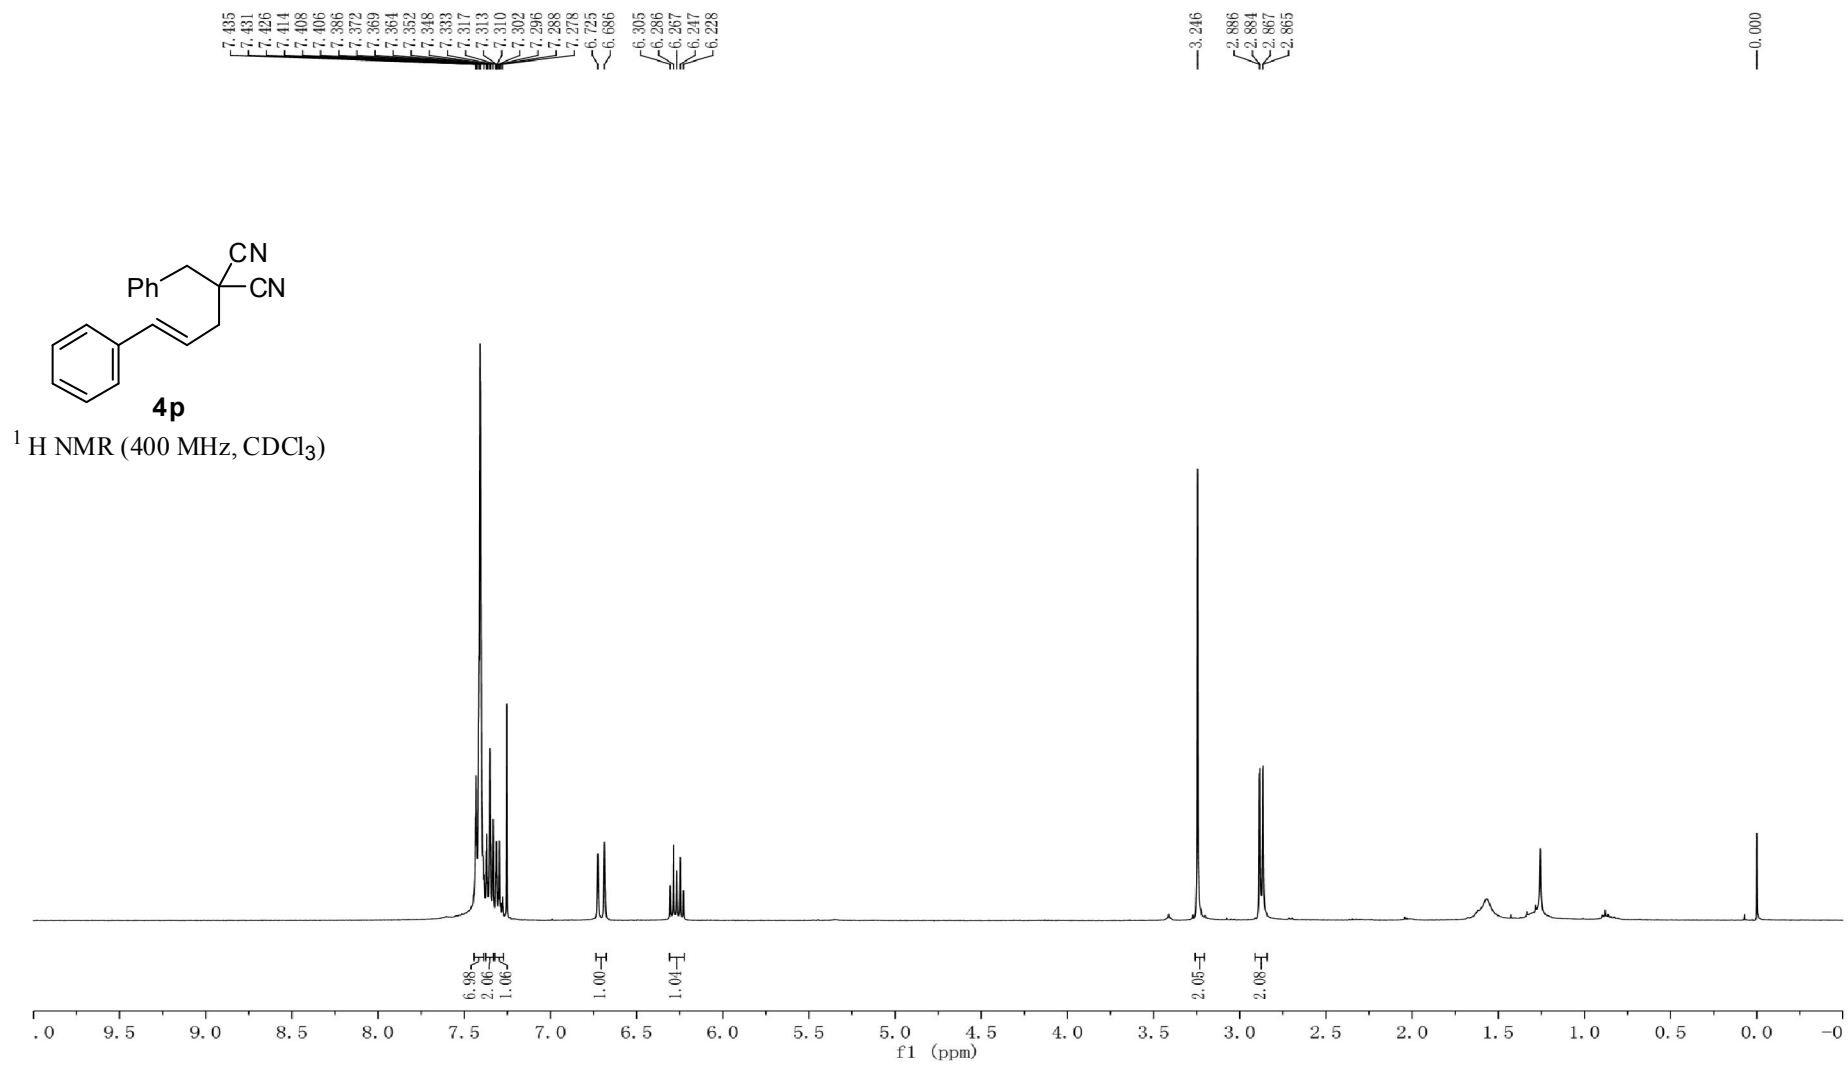

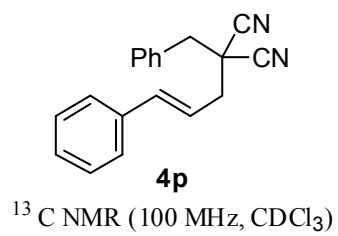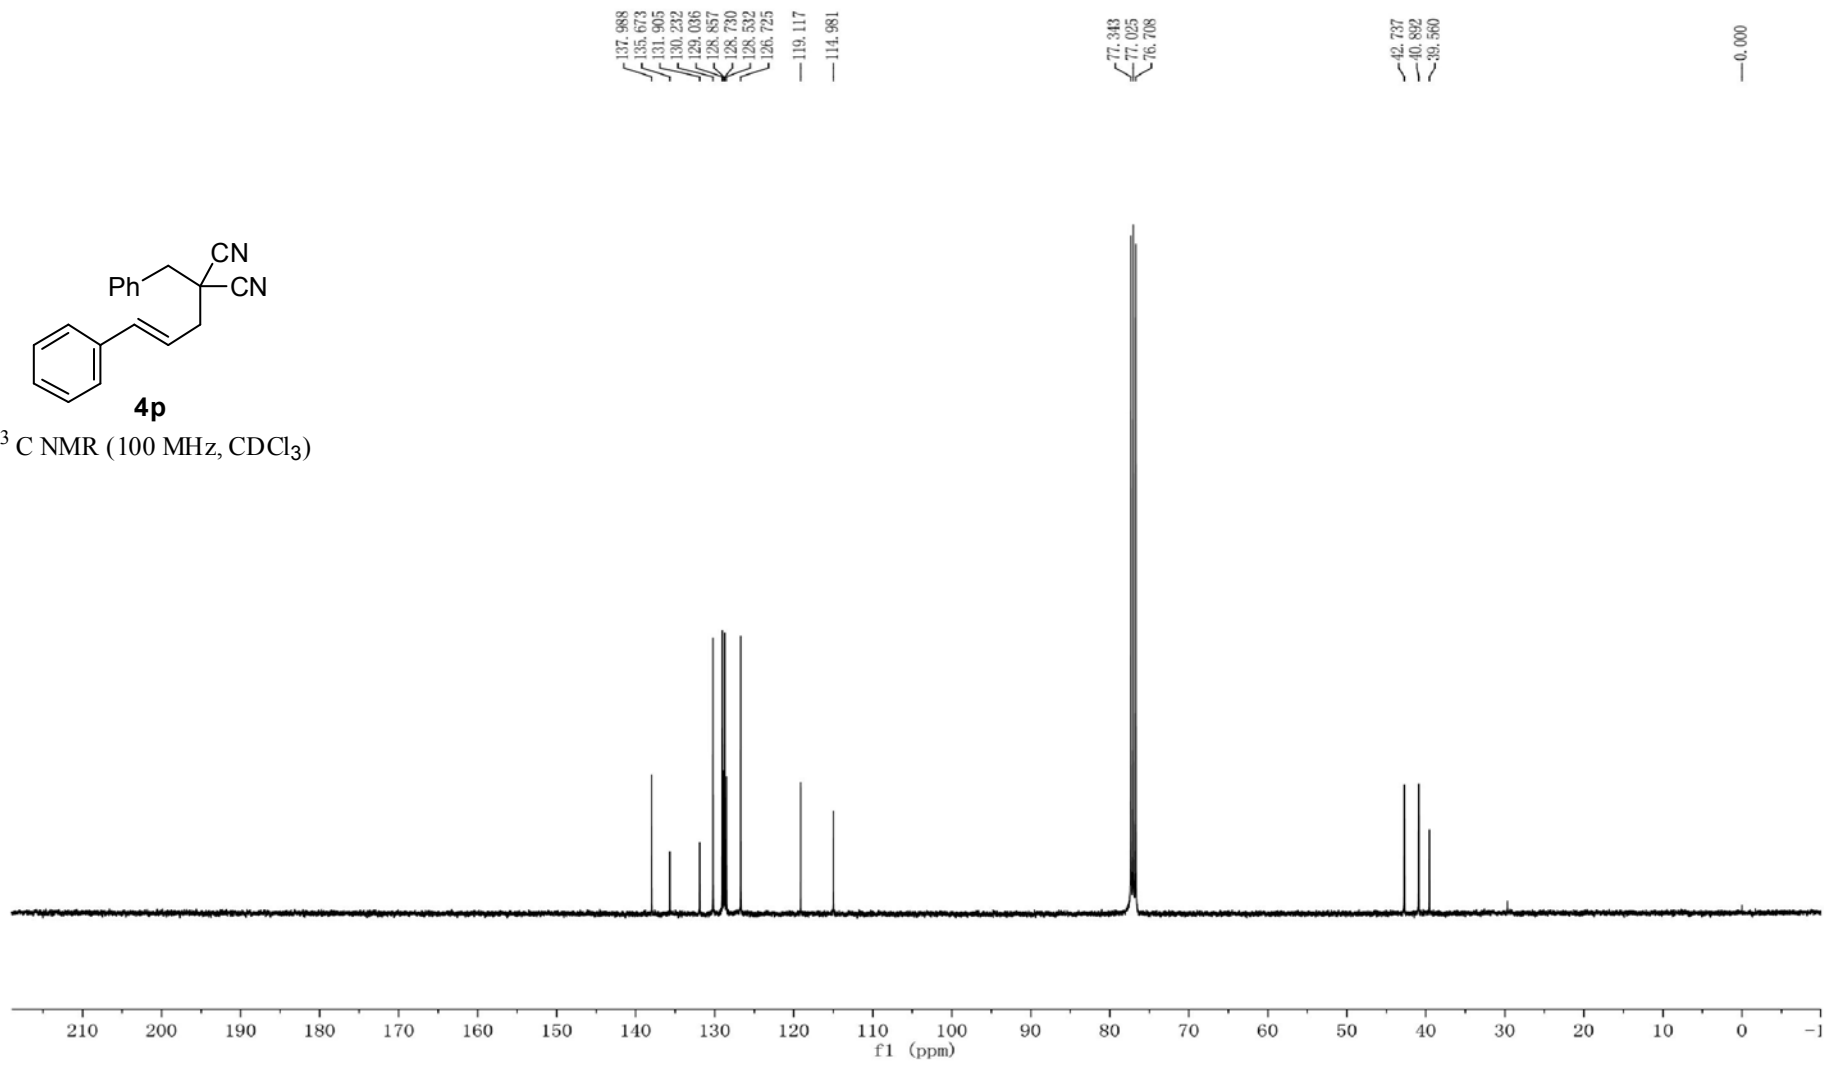

7.460  
7.456  
7.451  
7.439  
7.437  
7.431  
7.395  
7.393  
7.391  
7.388  
7.375  
7.371  
7.360  
7.357  
7.339  
7.335  
7.295  
7.291  
7.275  
7.272  
7.223  
7.220  
7.212  
7.205  
7.199  
7.189  
7.186  
7.183  
7.175  
7.172  
7.155  
6.642  
6.602  
6.383  
6.381  
6.374  
6.373  
6.361  
6.356  
6.353  
6.348  
6.061  
6.036  
6.021  
5.997  
3.349  
3.312  
3.241  
3.203  
2.868  
2.856  
2.845  
2.833  
2.821  
2.810  
2.798  
2.657  
2.651  
2.632  
2.628  
2.622  
2.603  
2.599  
2.580  
2.566  
2.559  
2.545  
2.524  
2.379  
2.376  
2.372  
2.369  
2.366  
2.358  
2.349  
2.346  
2.343  
2.339  
2.336  
2.106  
2.094  
2.084  
2.077  
2.073  
2.065  
2.061  
2.055  
2.051  
2.044  
2.039  
2.032  
2.029

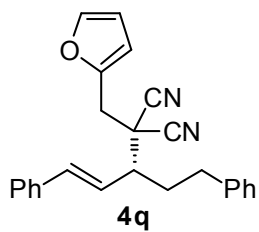

<sup>1</sup>H NMR (400 MHz, CDCl<sub>3</sub>)

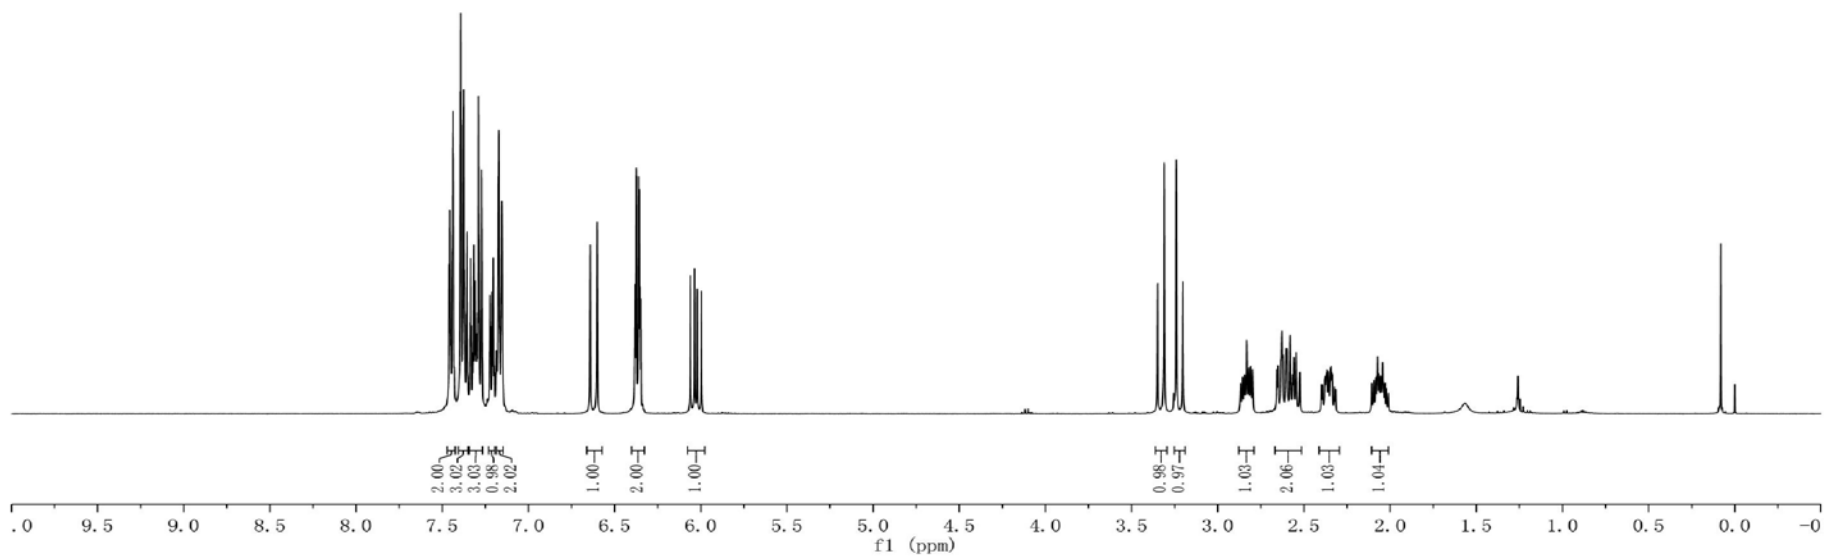

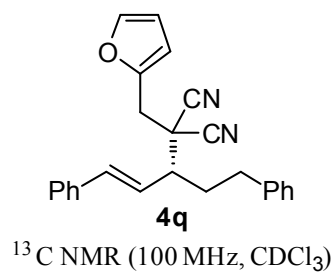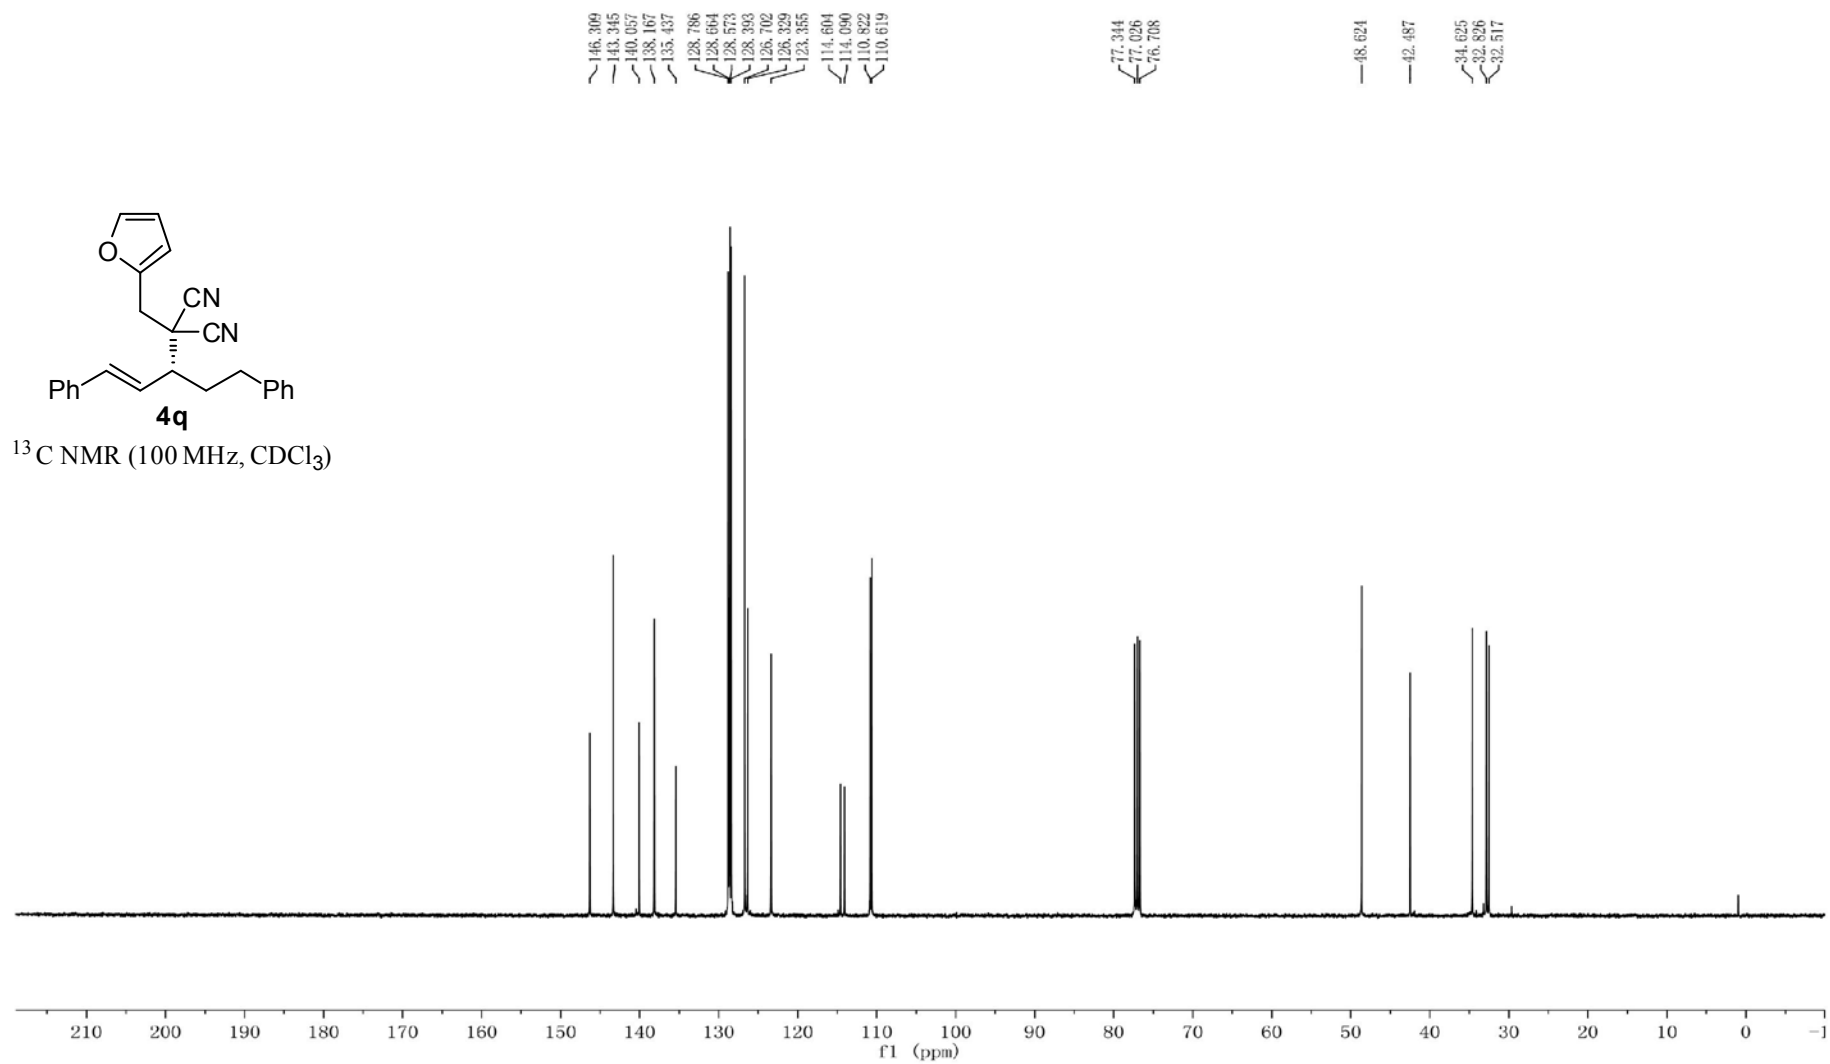

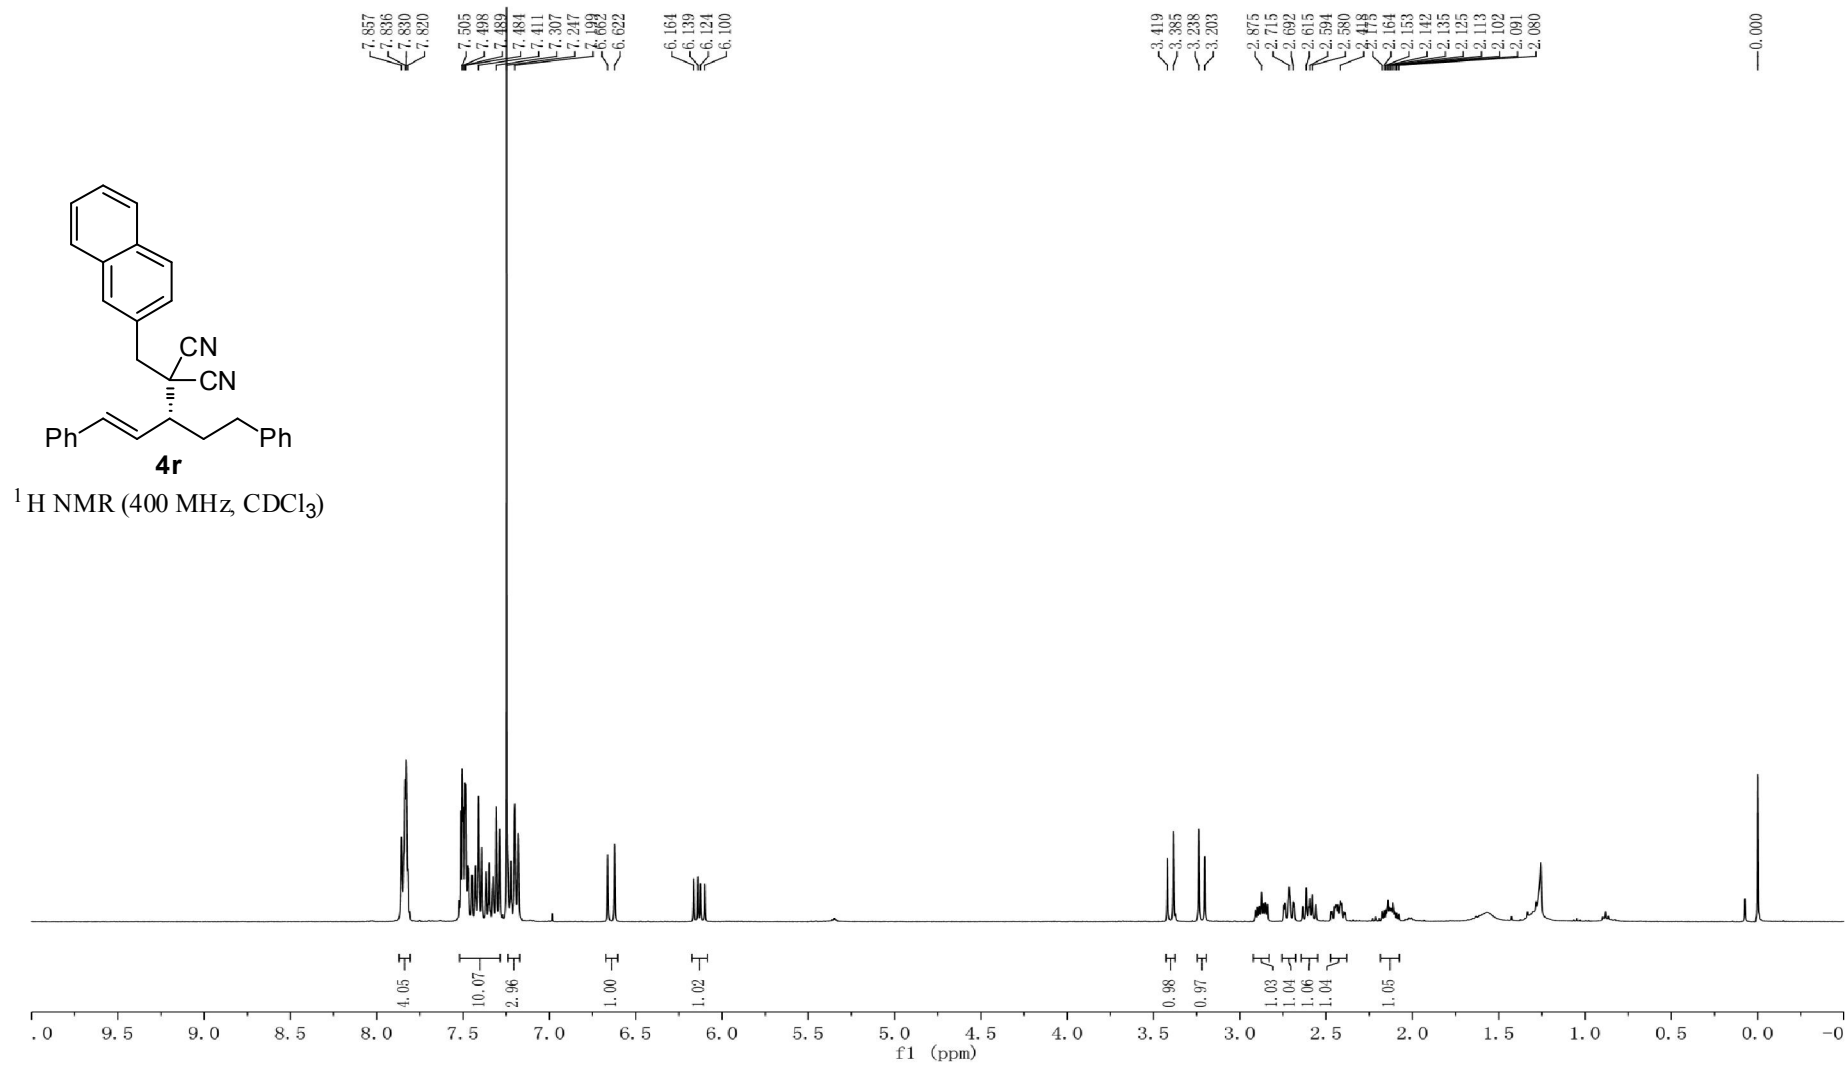

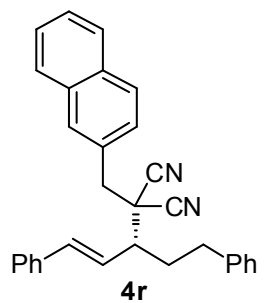

$^{13}\text{C}$  NMR (100 MHz,  $\text{CDCl}_3$ )

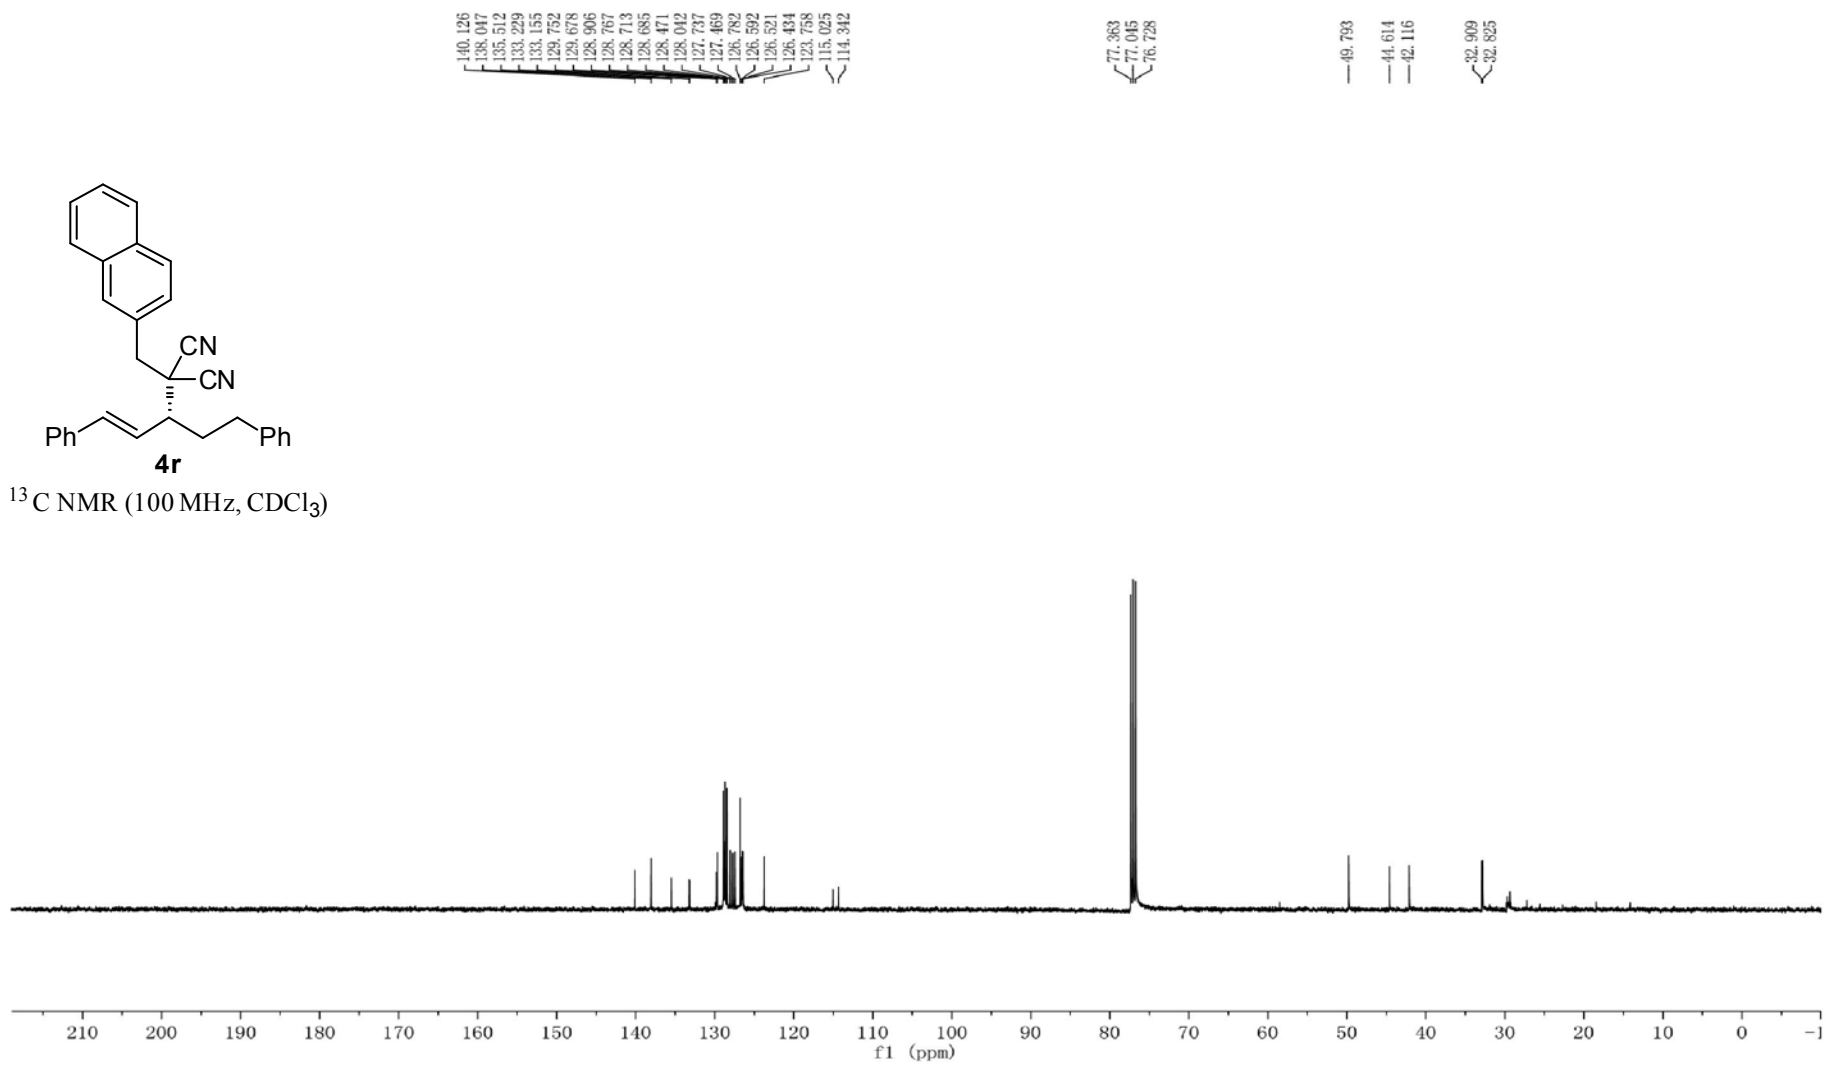



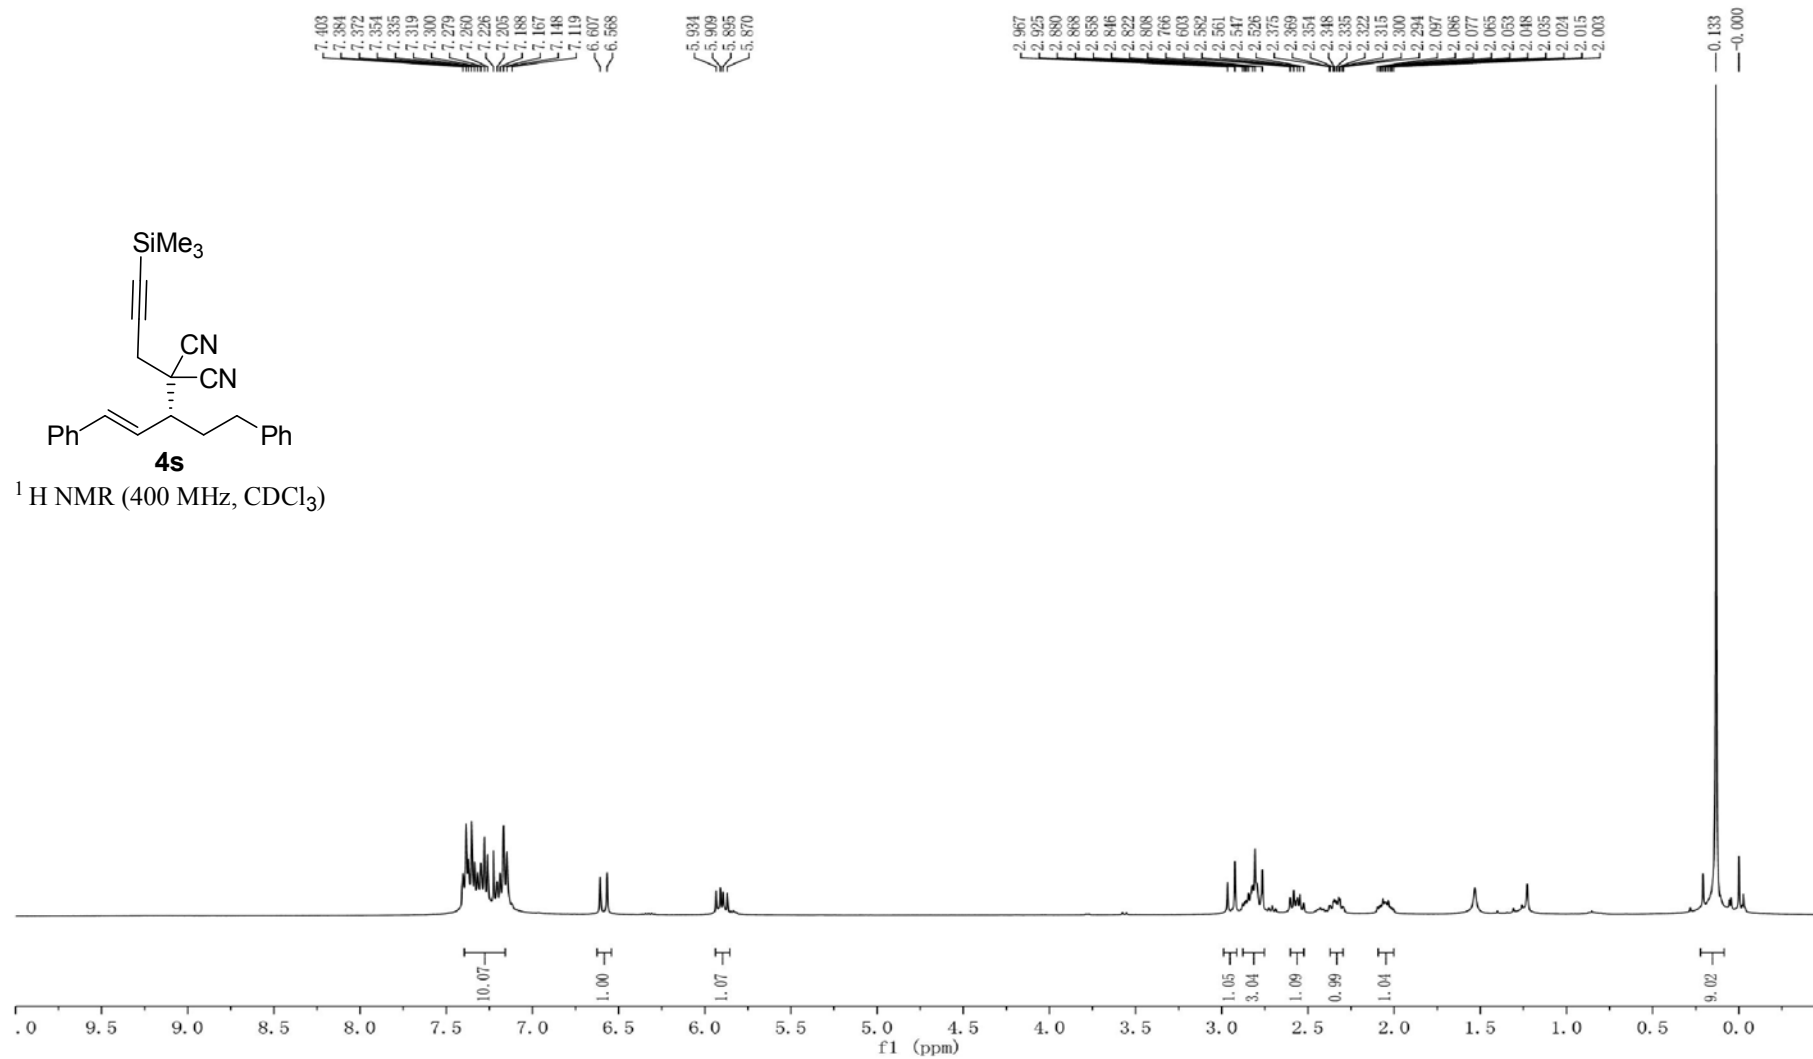

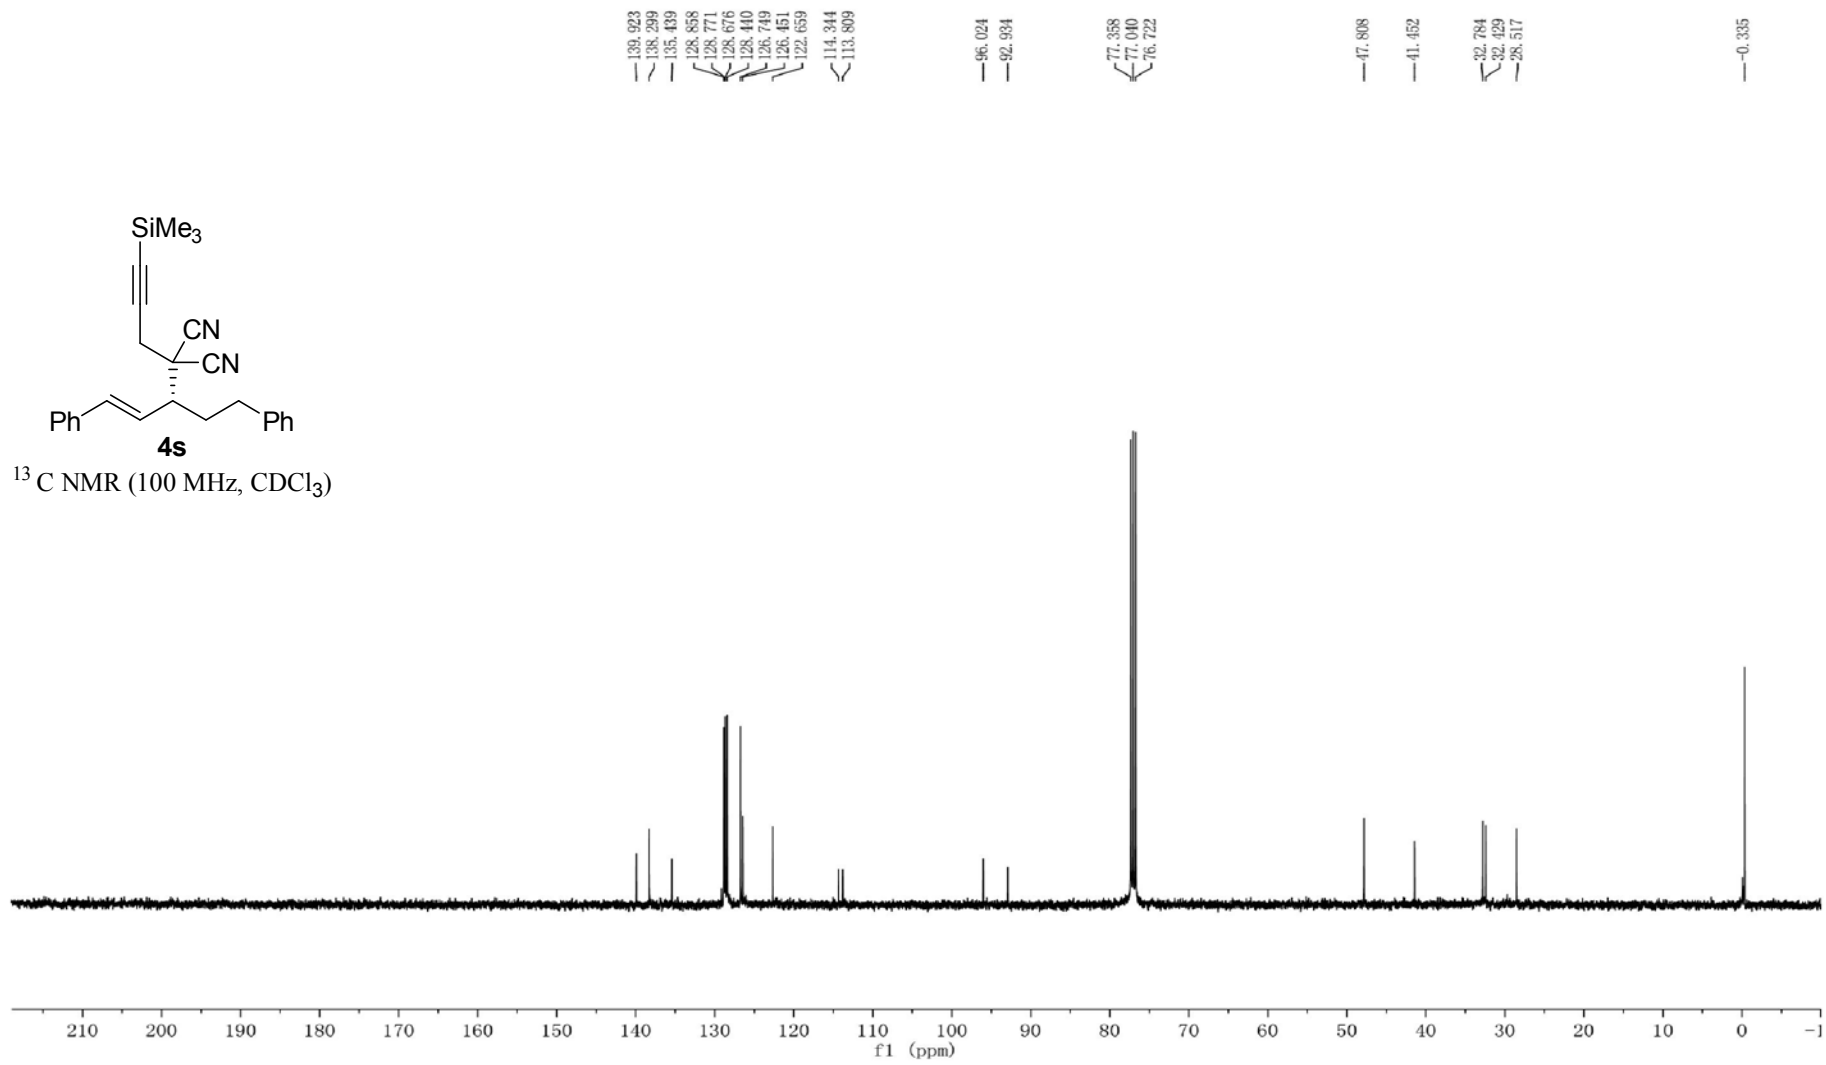

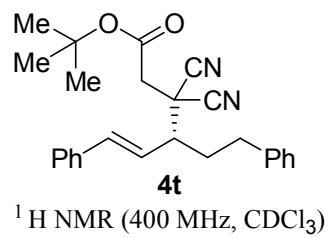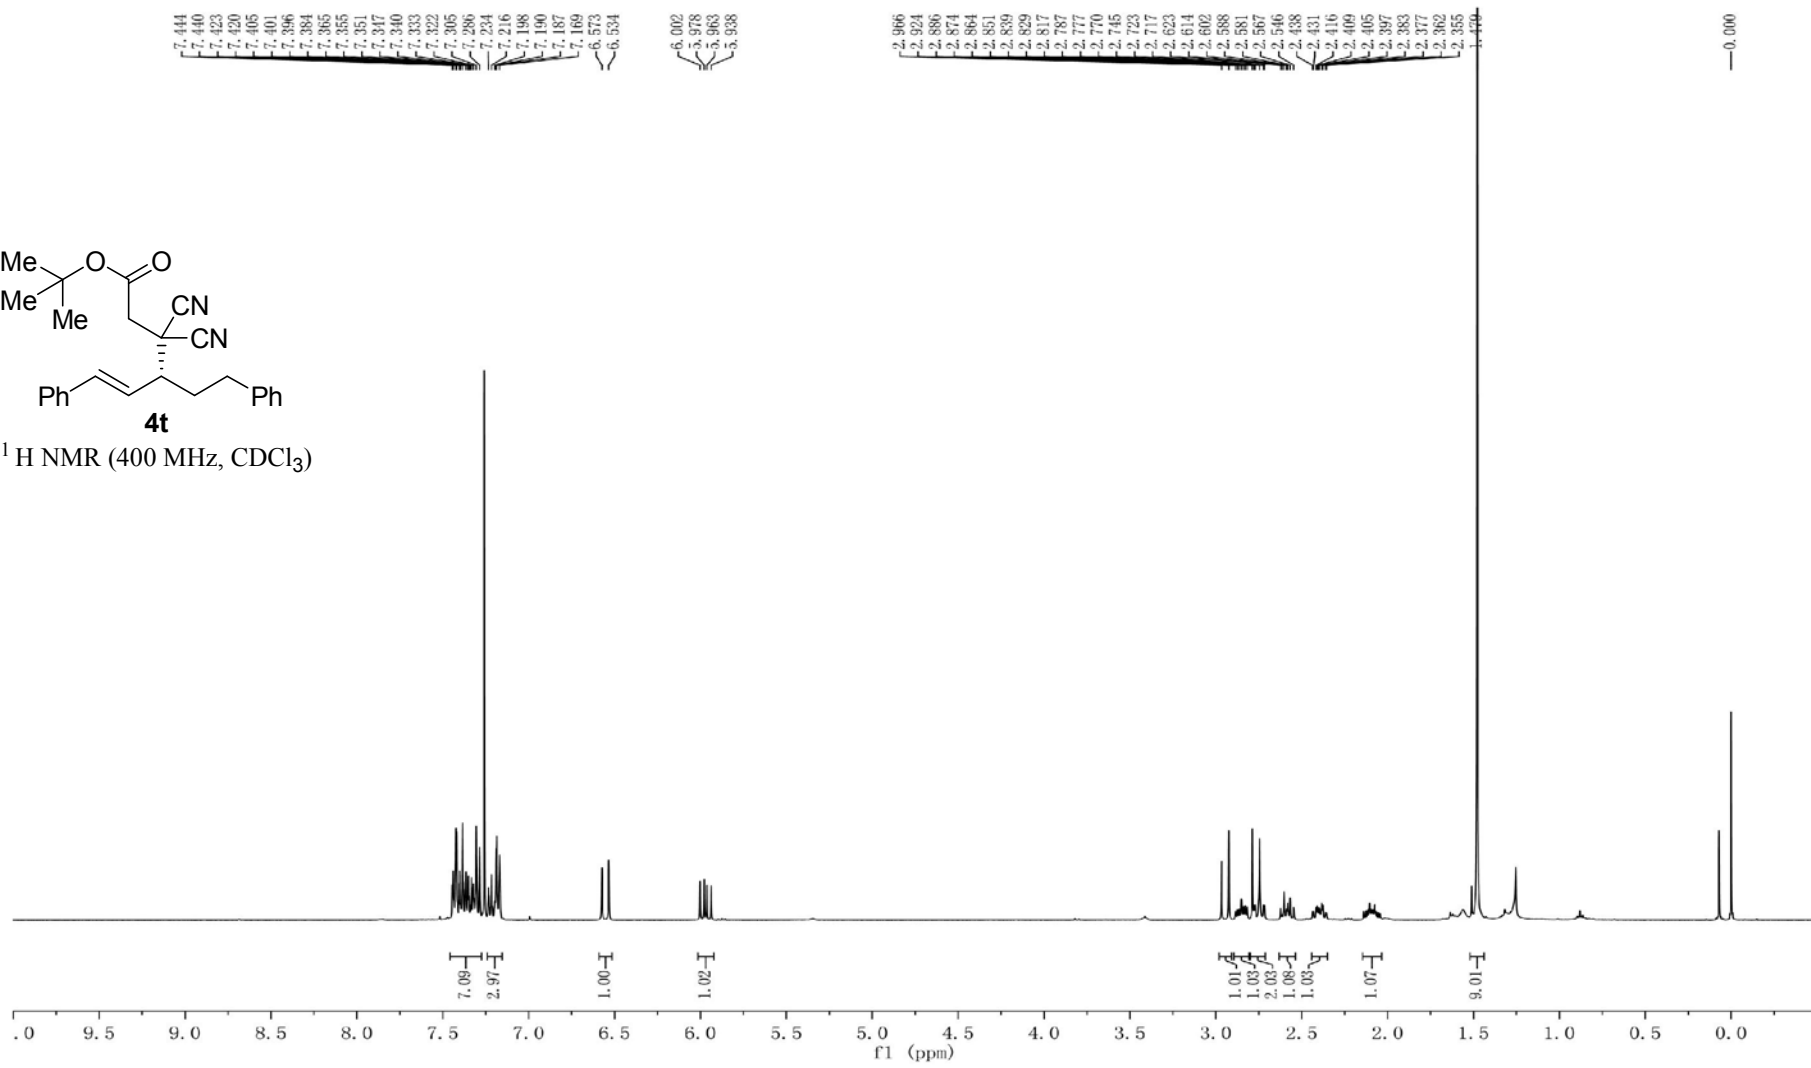

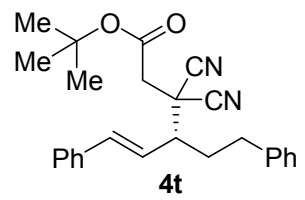

<sup>13</sup>C NMR (100 MHz, CDCl<sub>3</sub>)

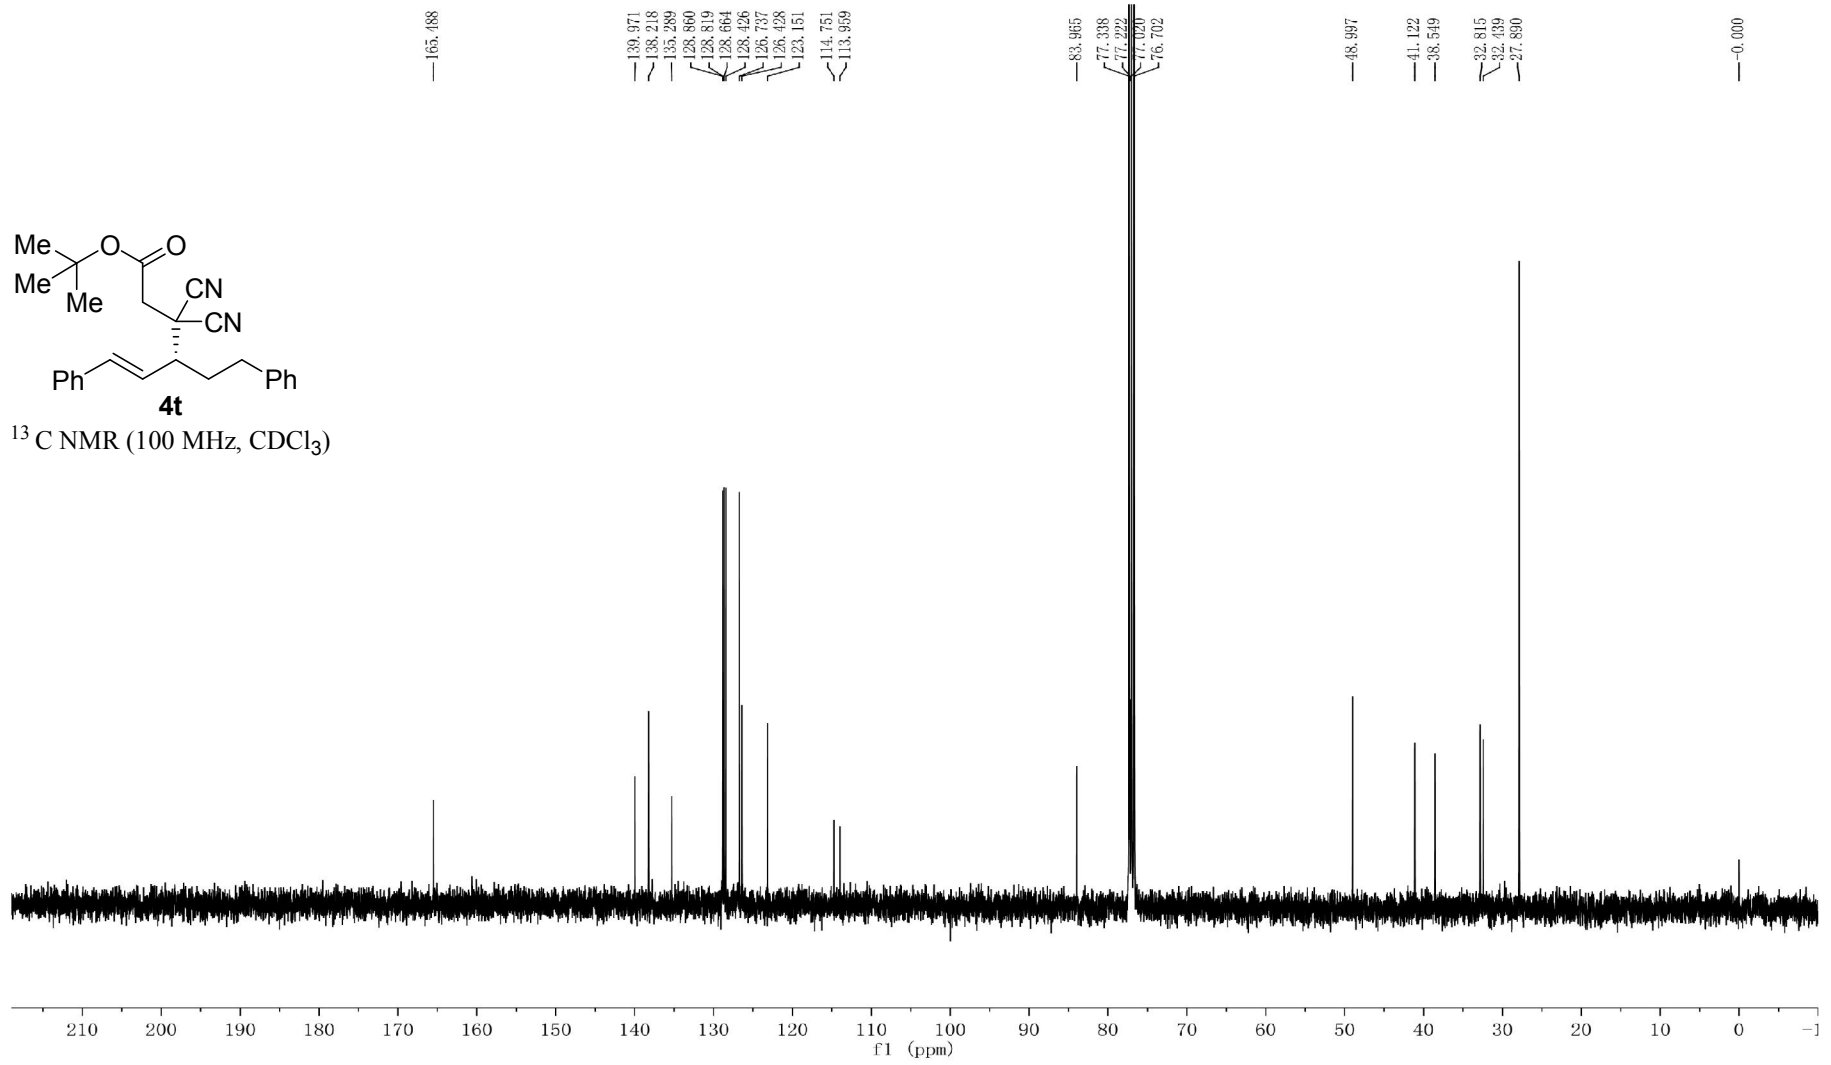

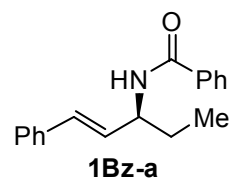

<sup>1</sup>H NMR (400 MHz, CDCl<sub>3</sub>)

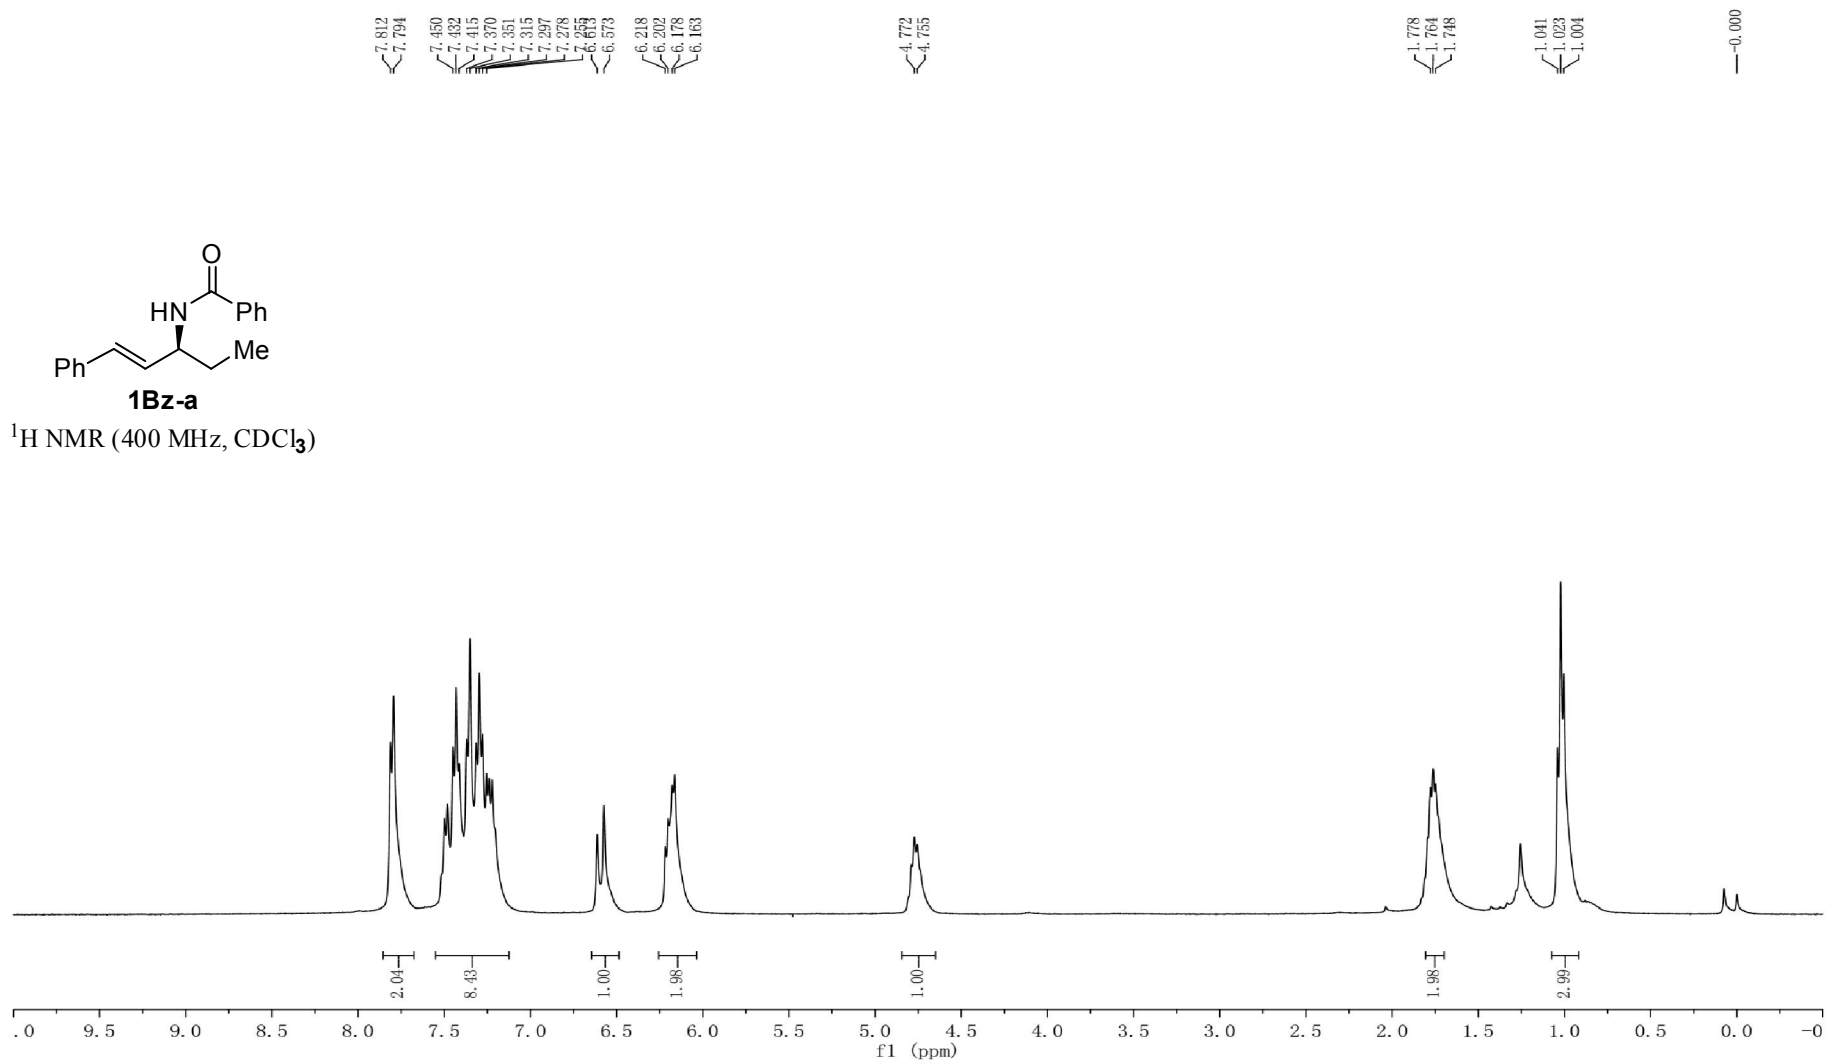

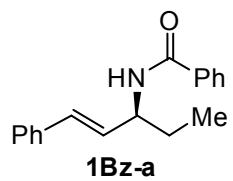

$^{13}\text{C}$  NMR (100 MHz,  $\text{CDCl}_3$ )

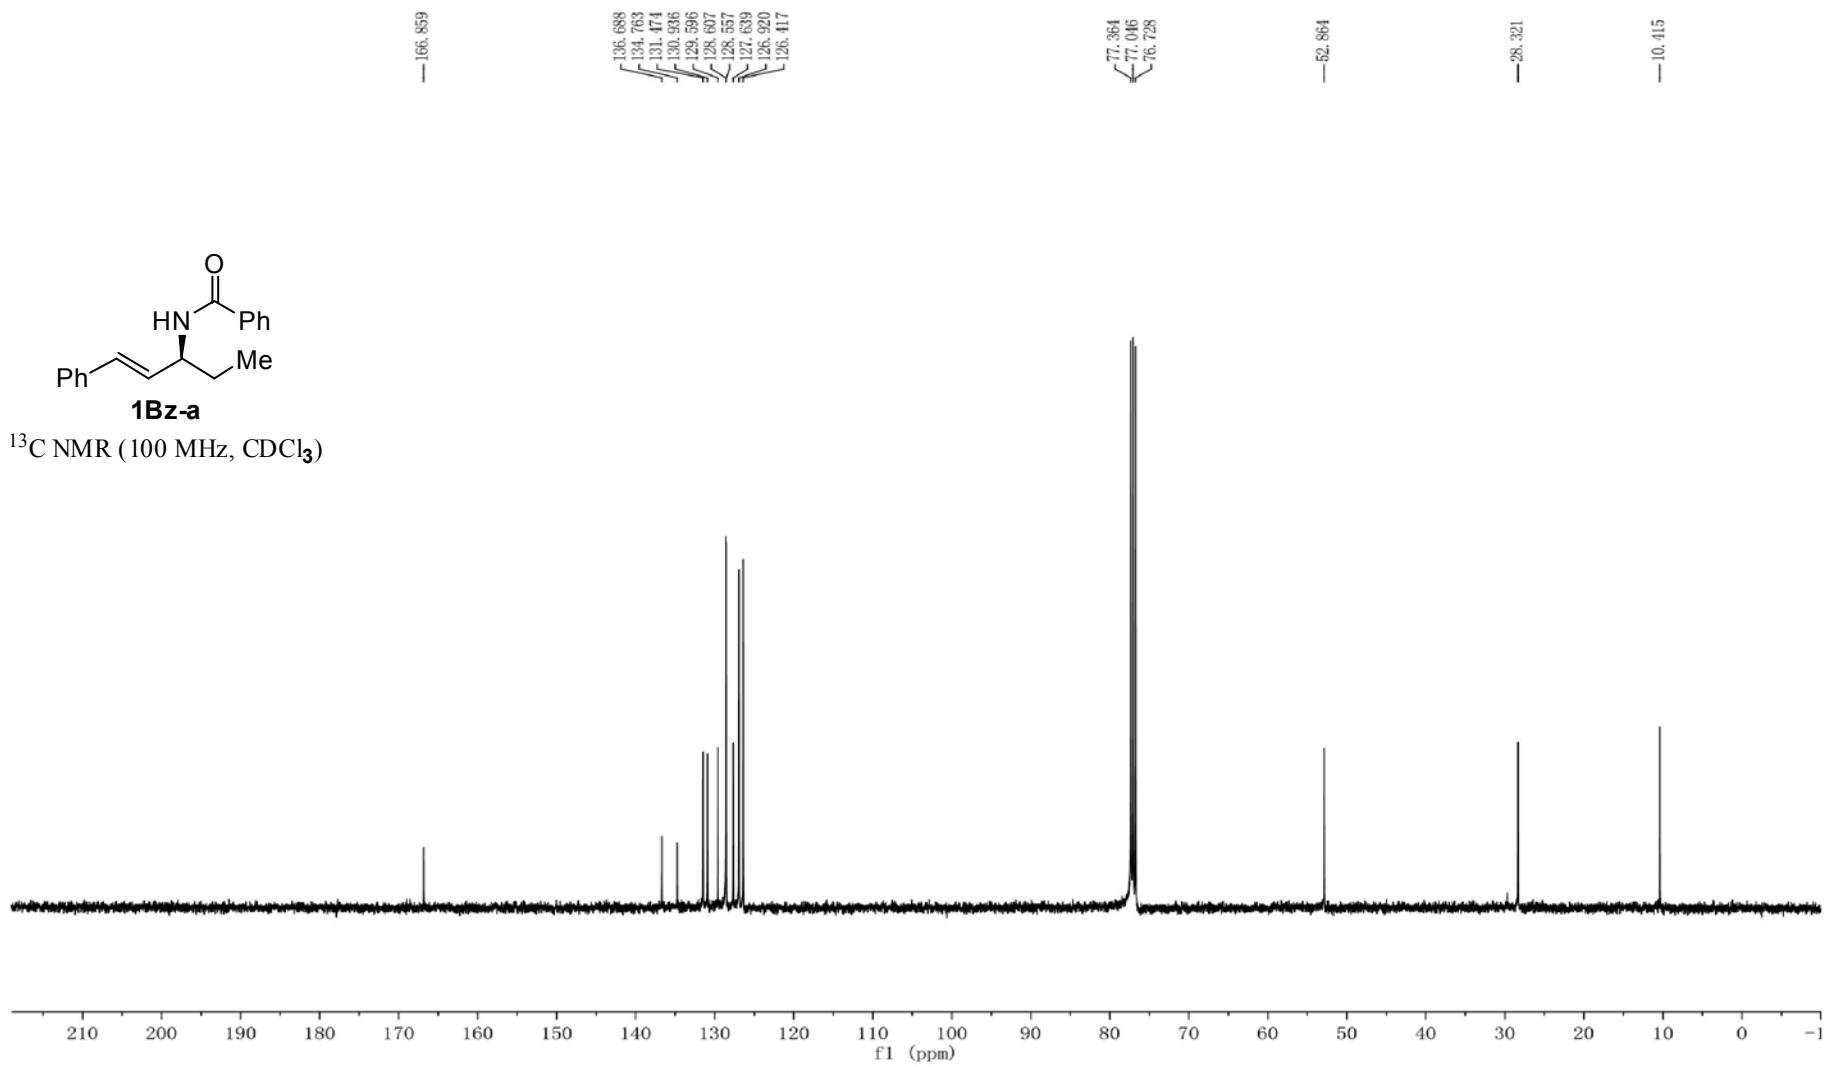

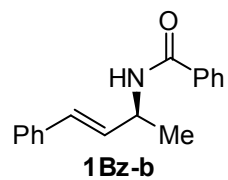

<sup>1</sup>H NMR (400 MHz, CDCl<sub>3</sub>)

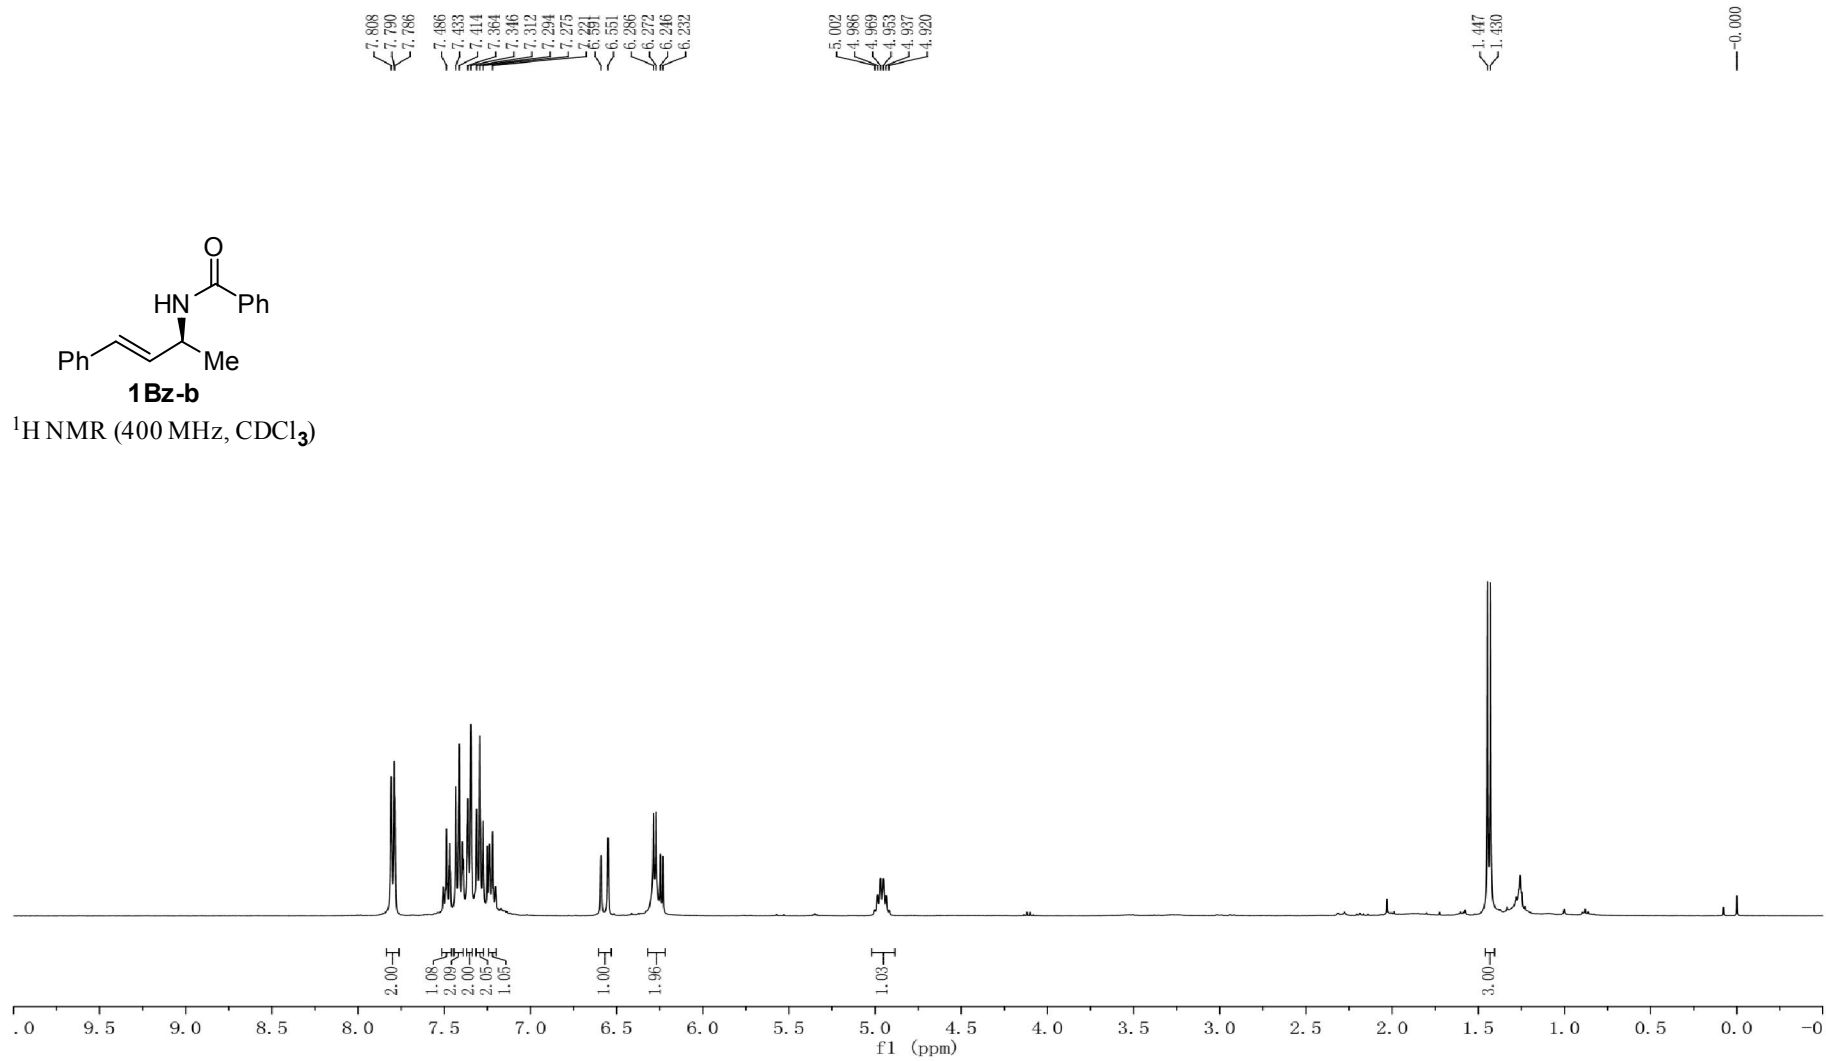

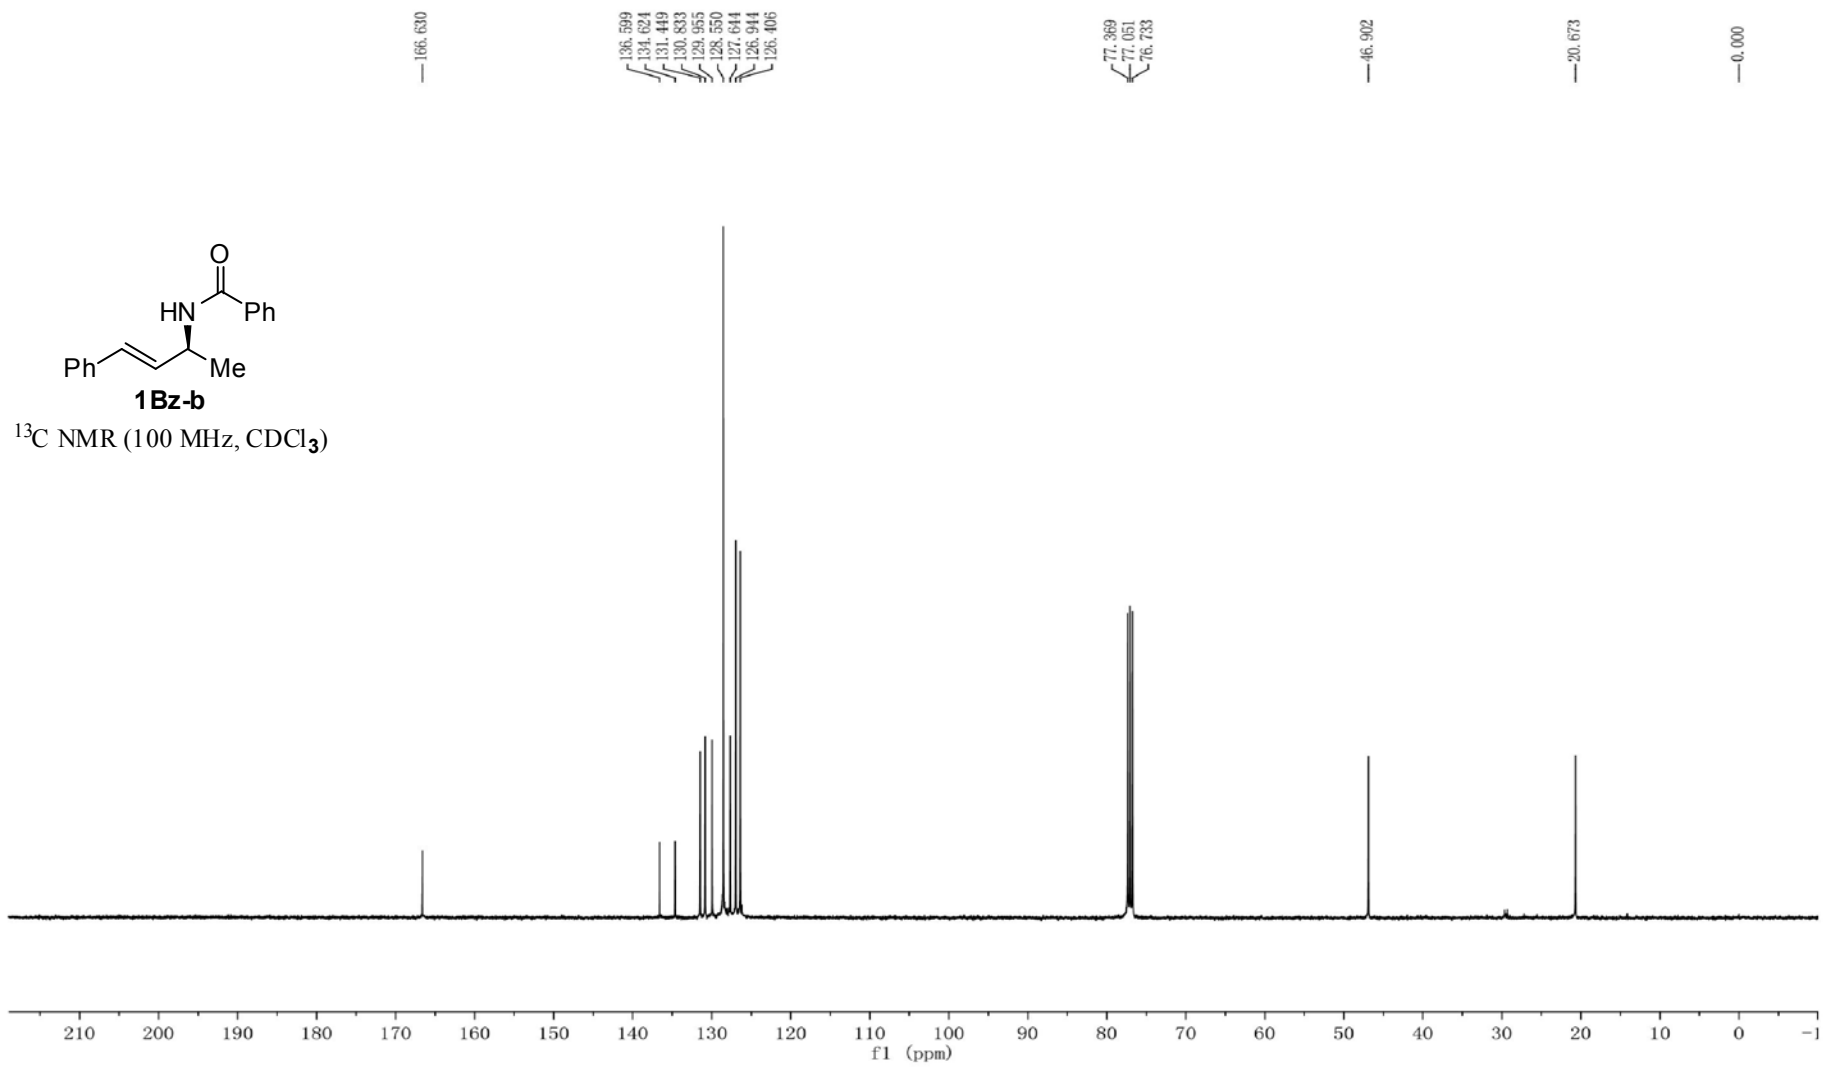



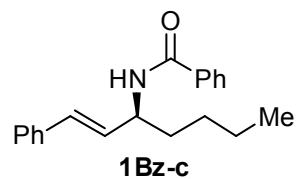

$^1\text{H}$  NMR (400 MHz,  $\text{CDCl}_3$ )

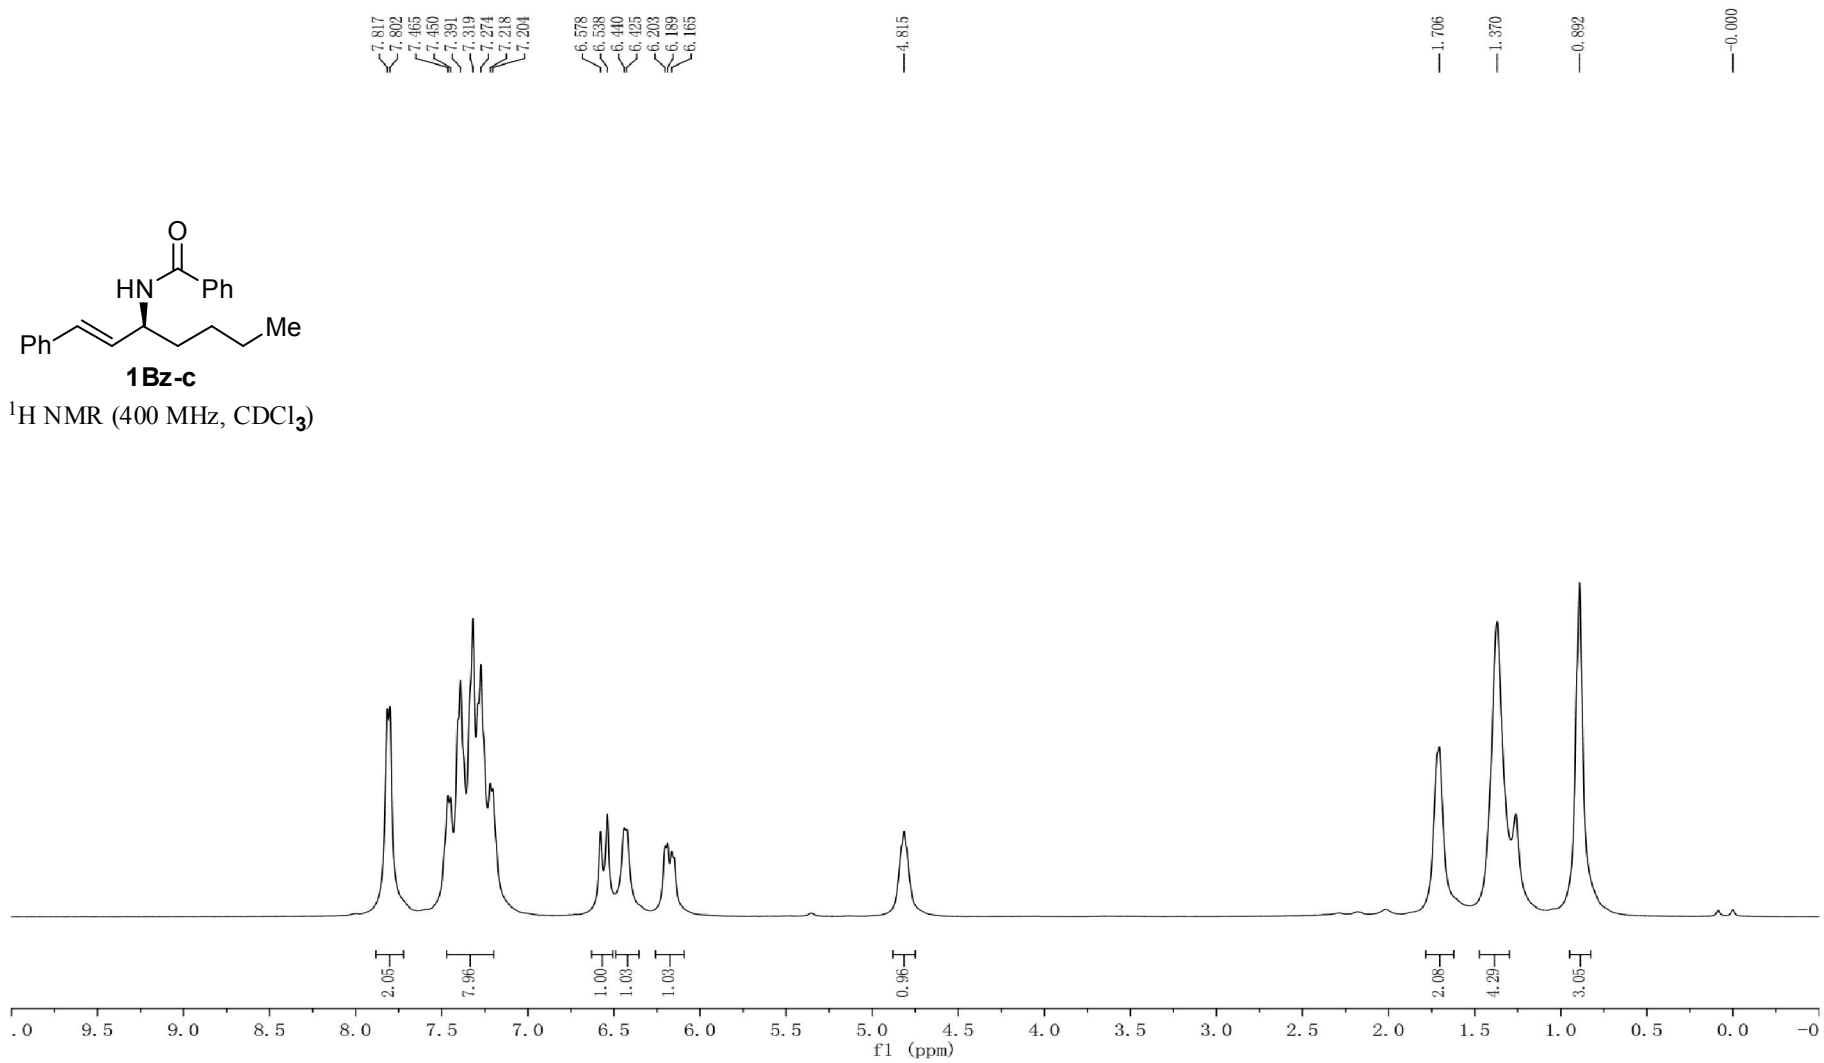

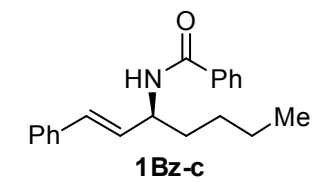

$^{13}\text{C}$  NMR (100 MHz,  $\text{CDCl}_3$ )

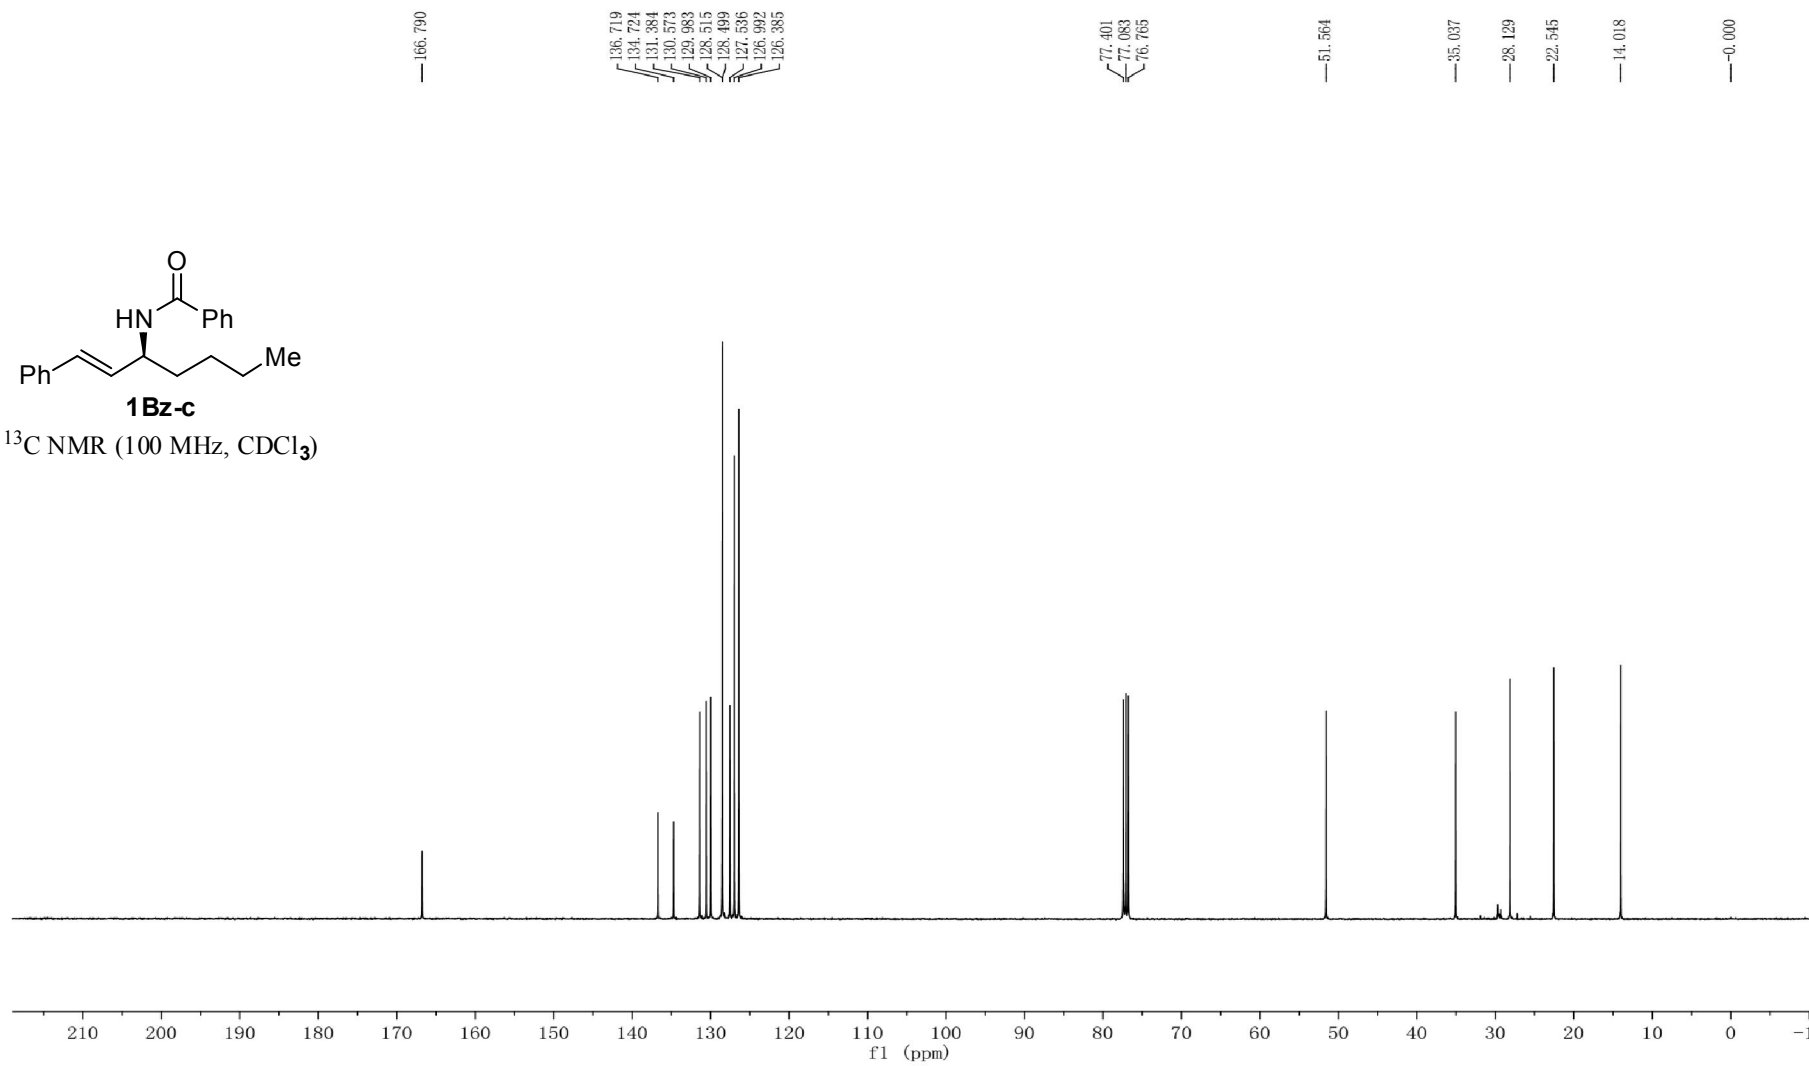

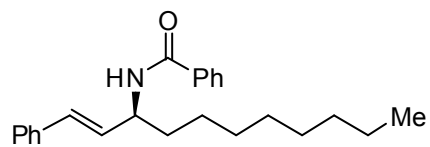

<sup>1</sup>H NMR (400 MHz, CDCl<sub>3</sub>)

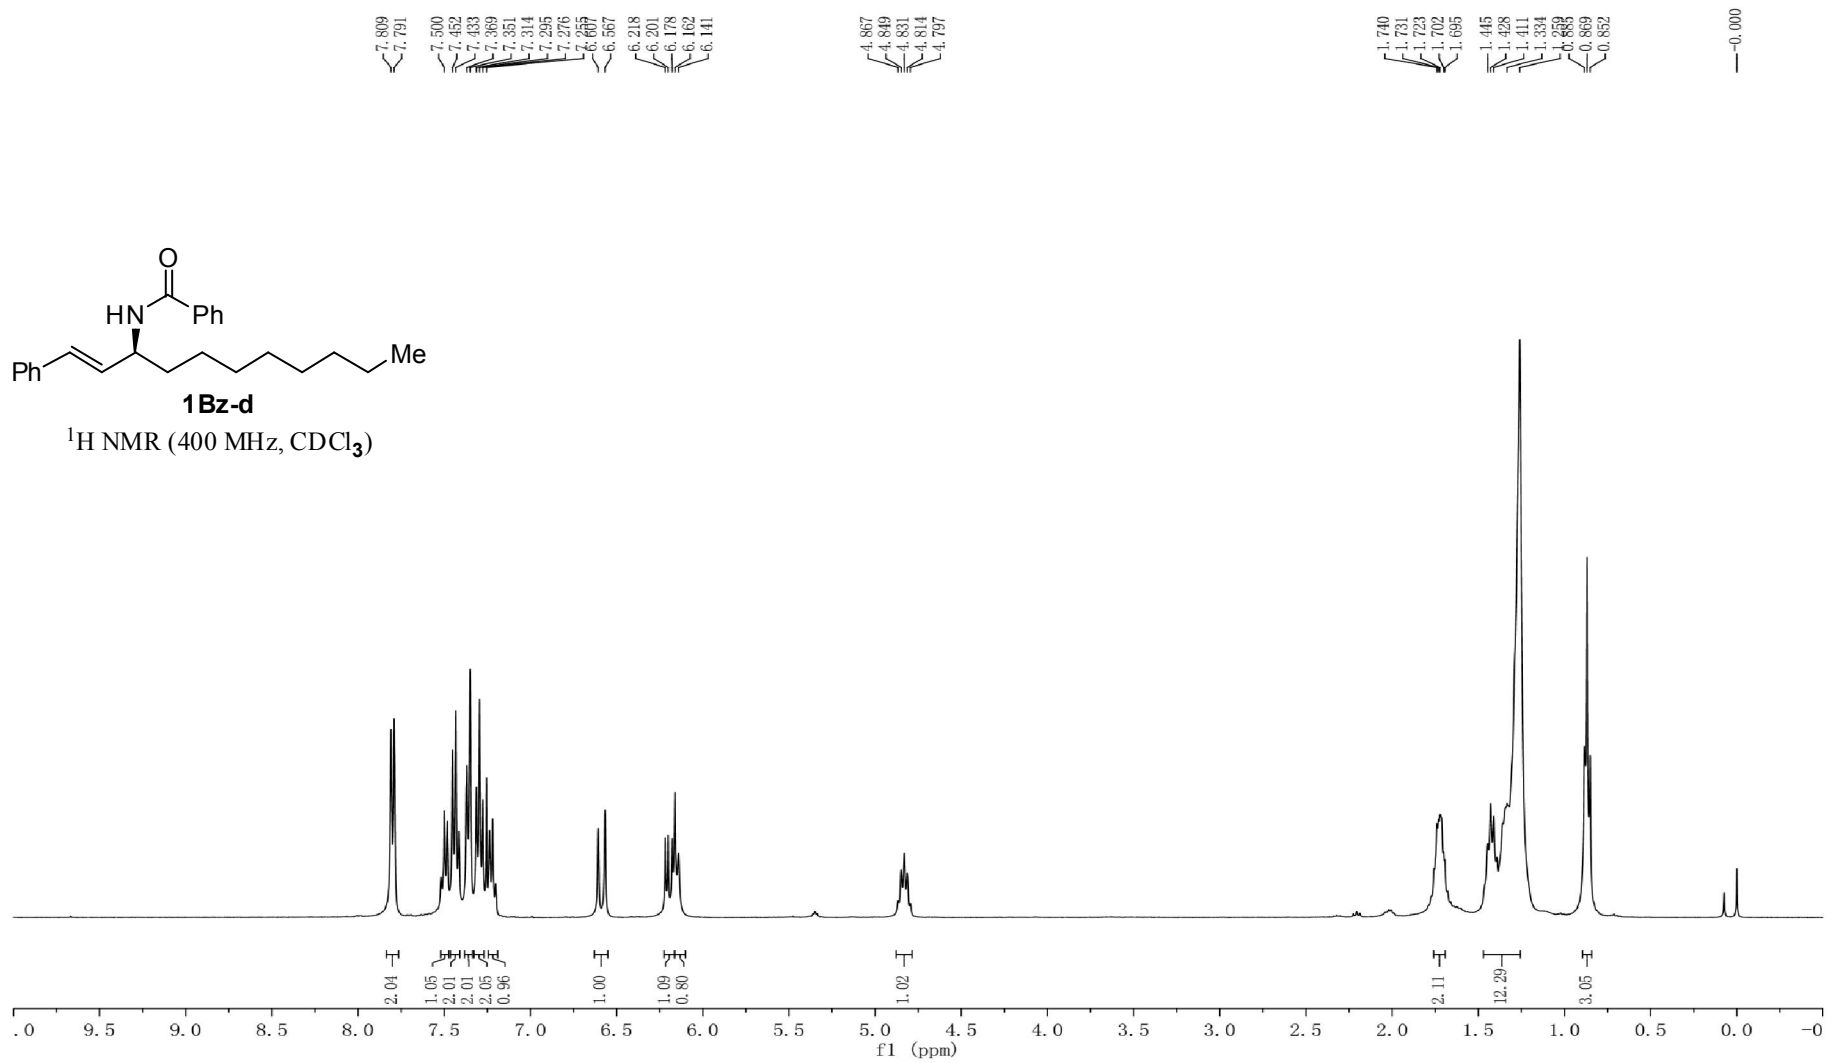

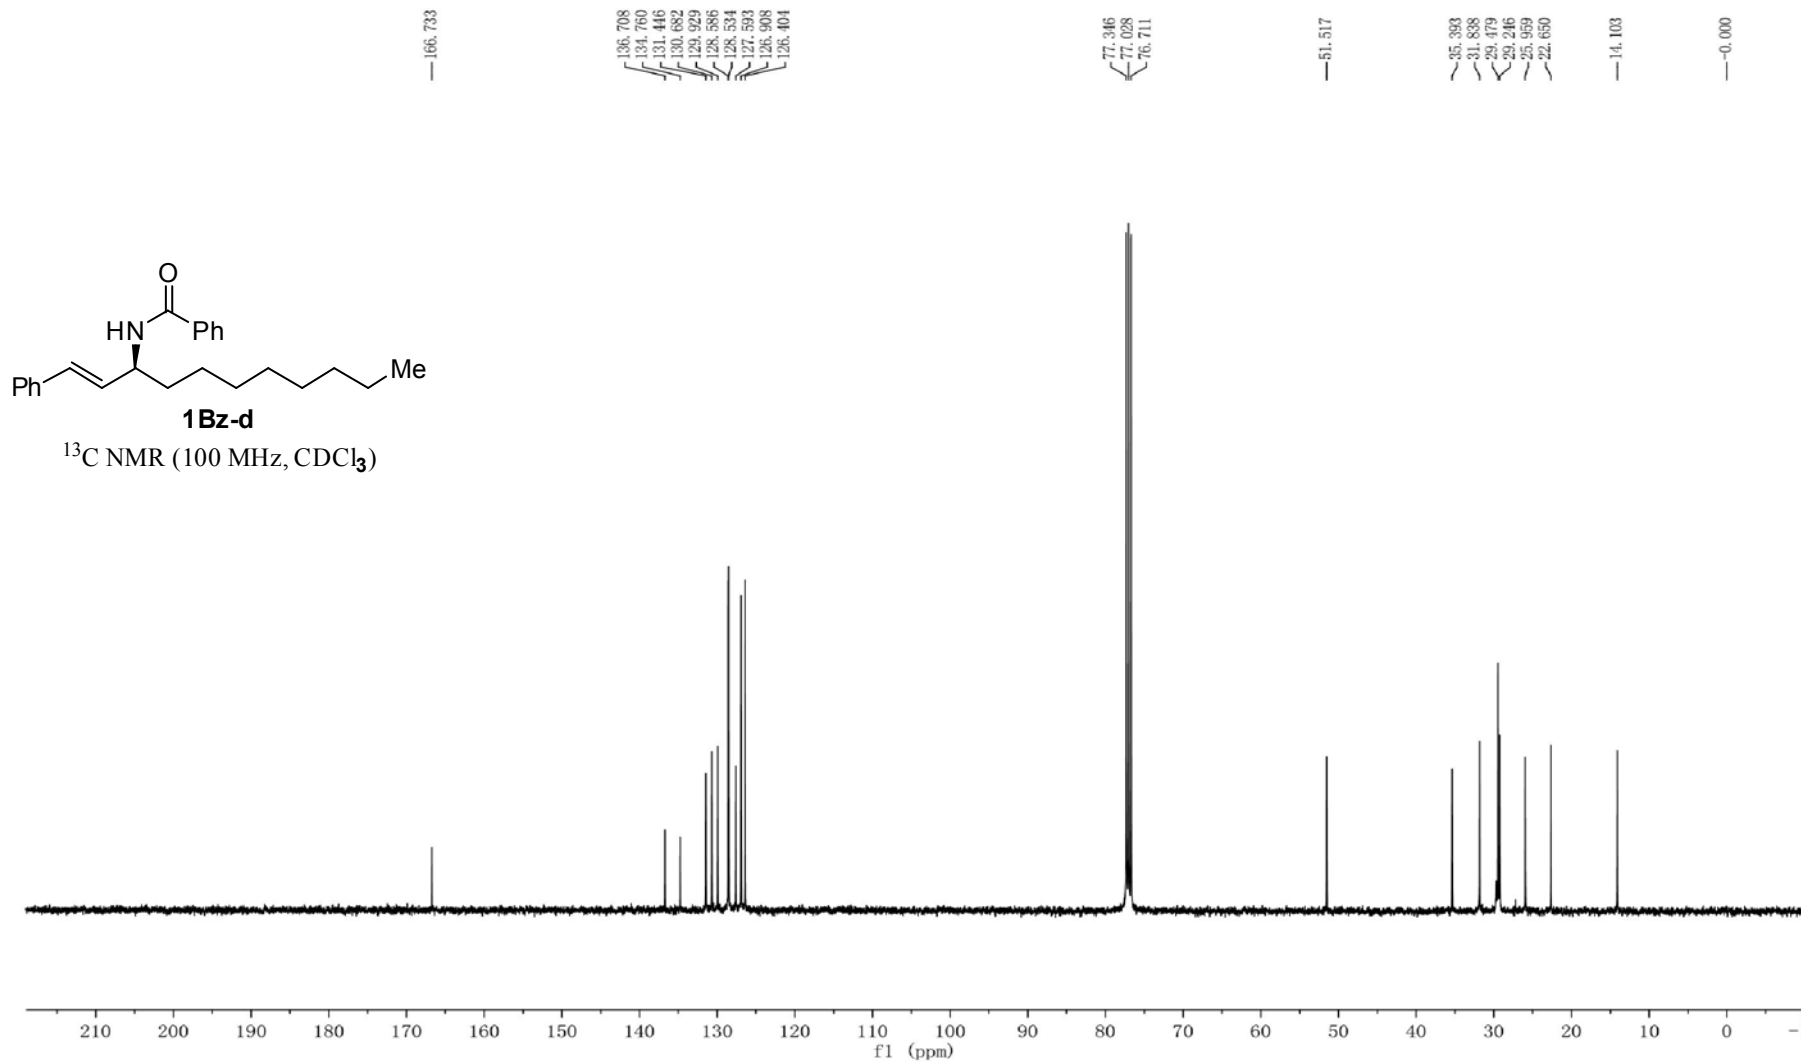

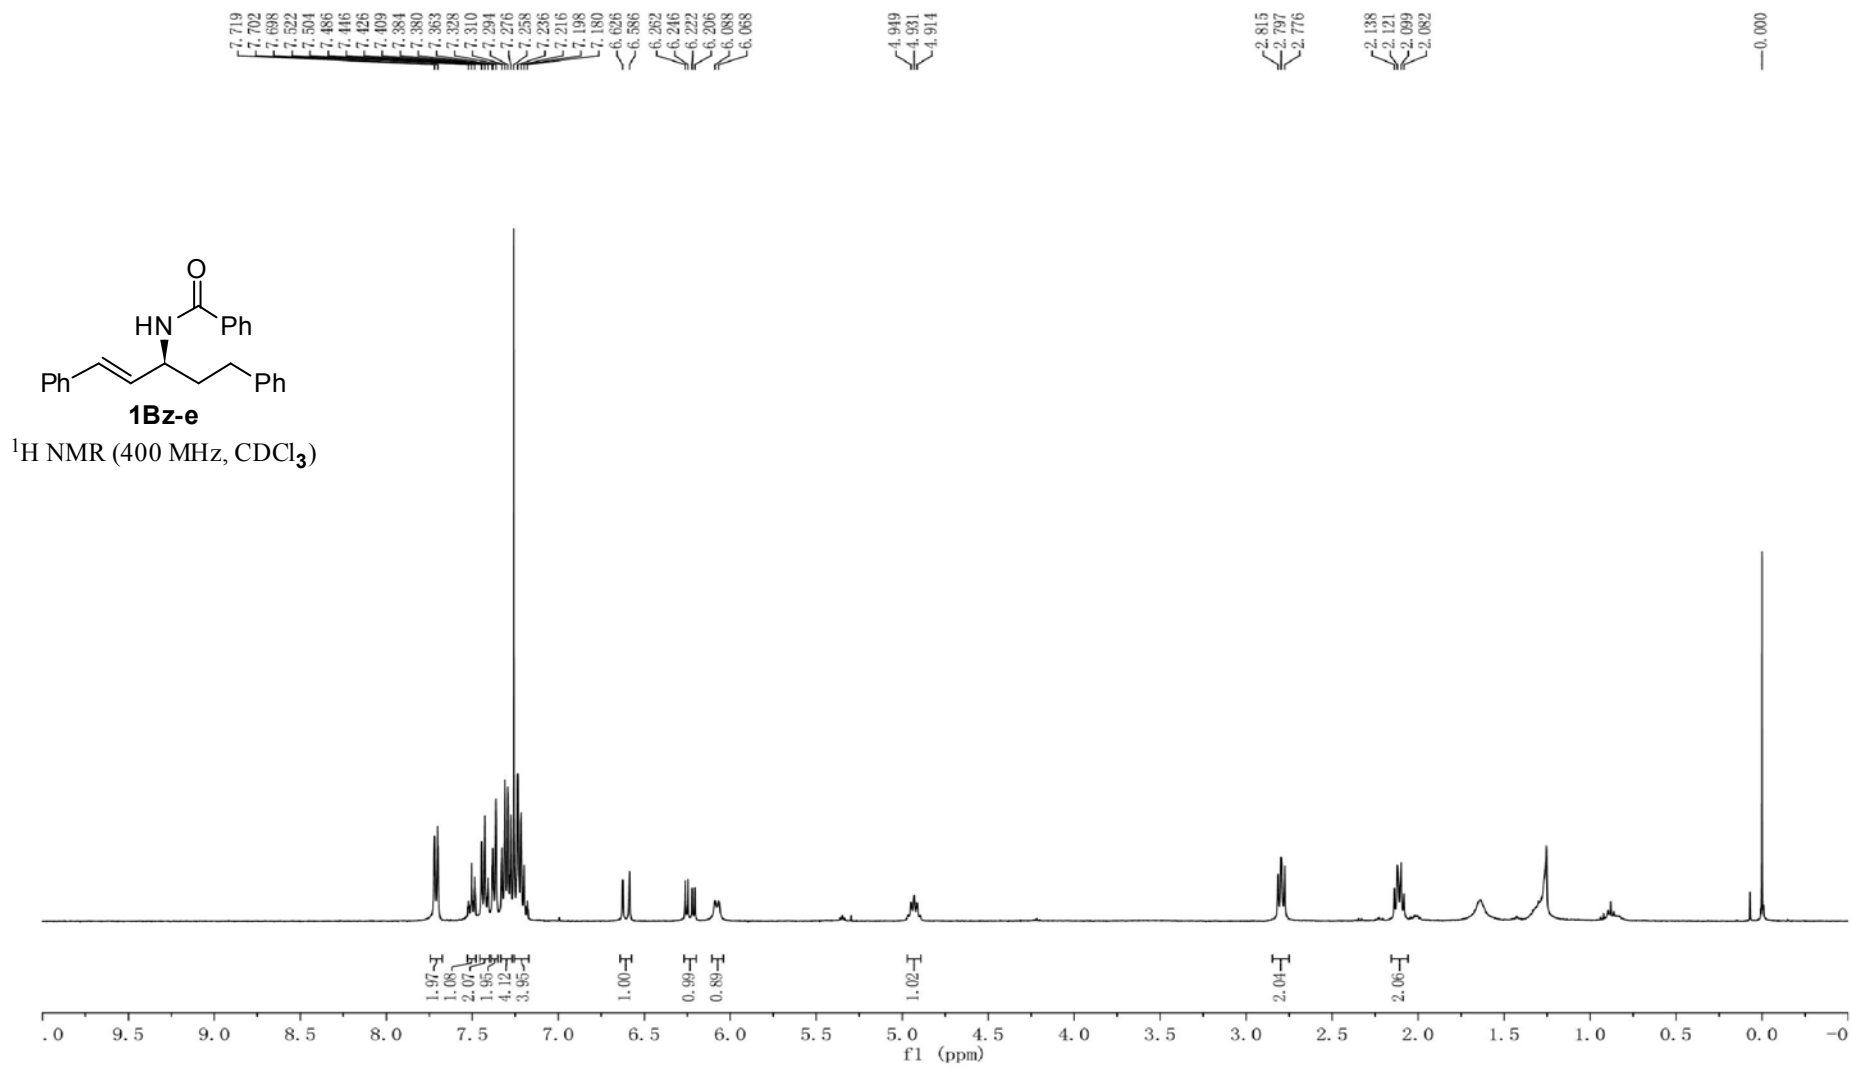

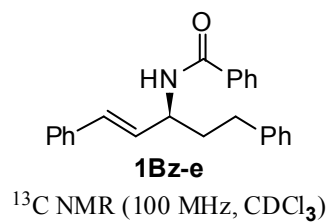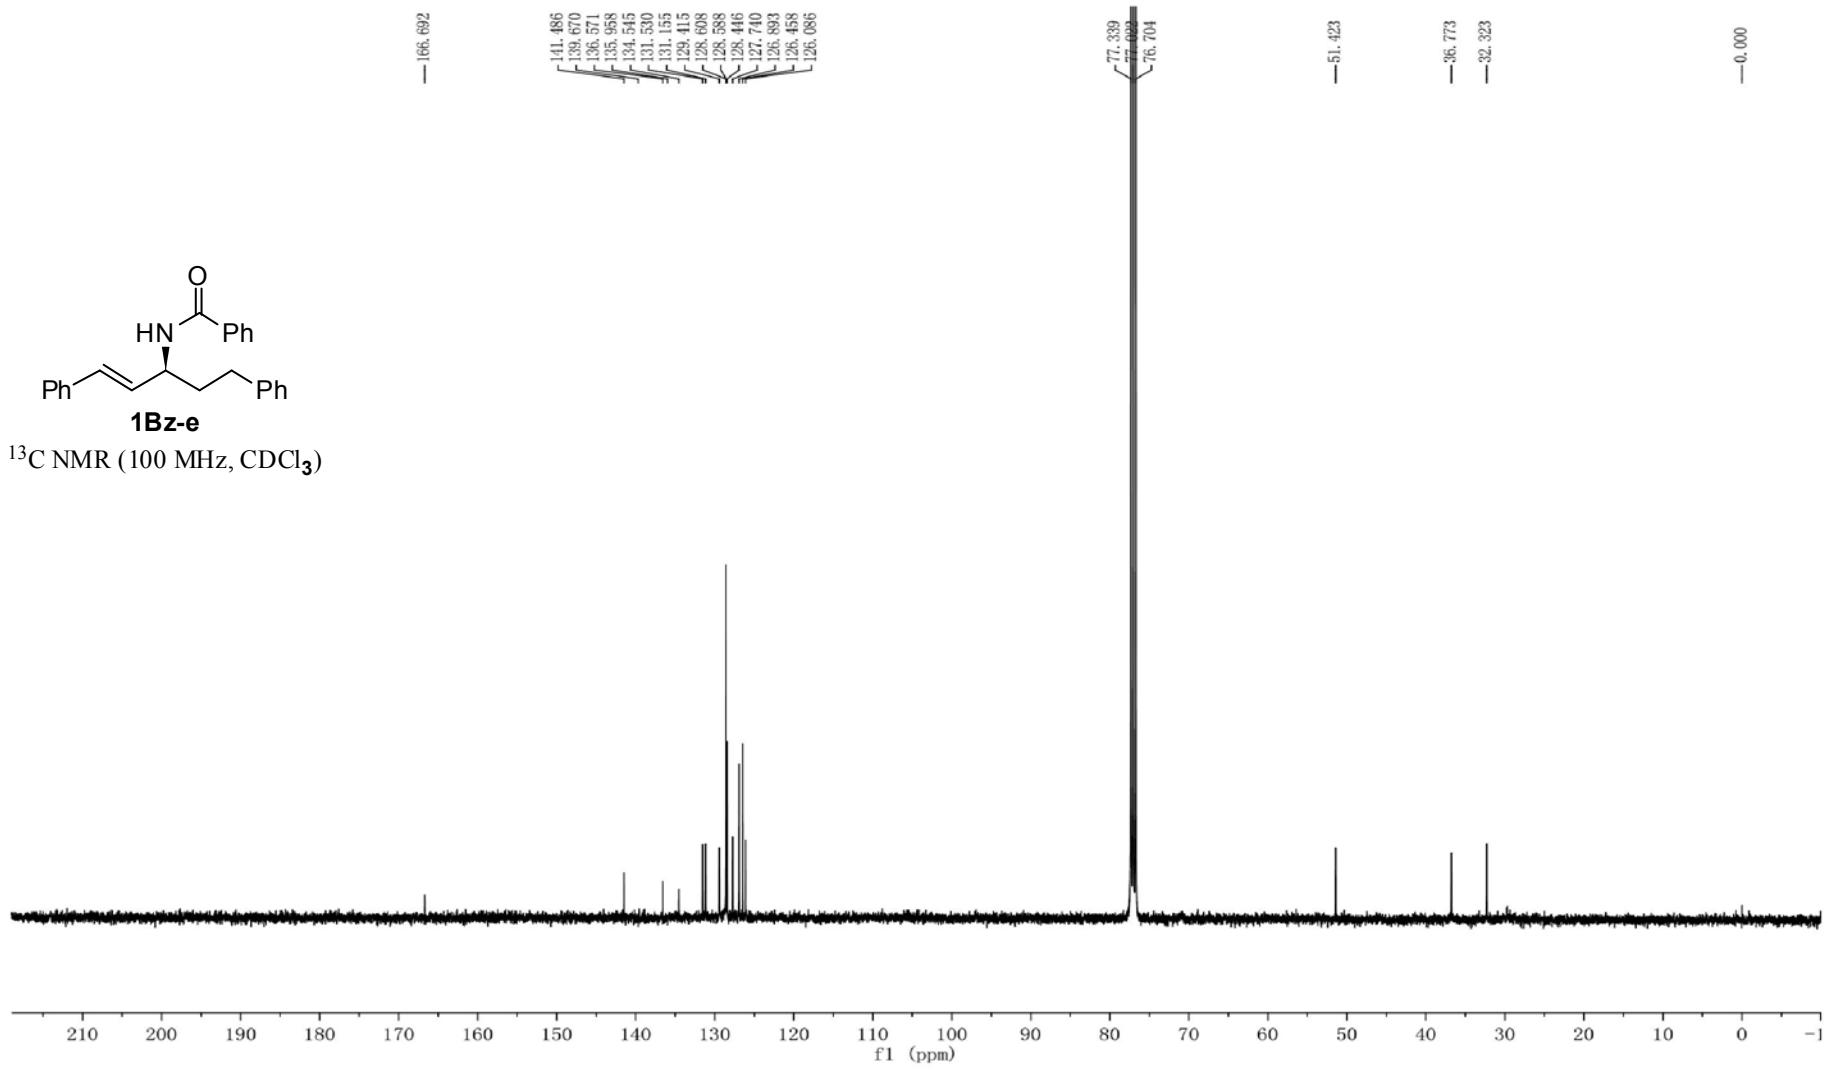

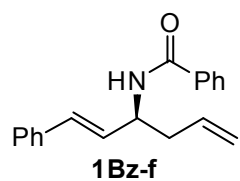

$^1\text{H NMR}$  (400 MHz,  $\text{CDCl}_3$ )

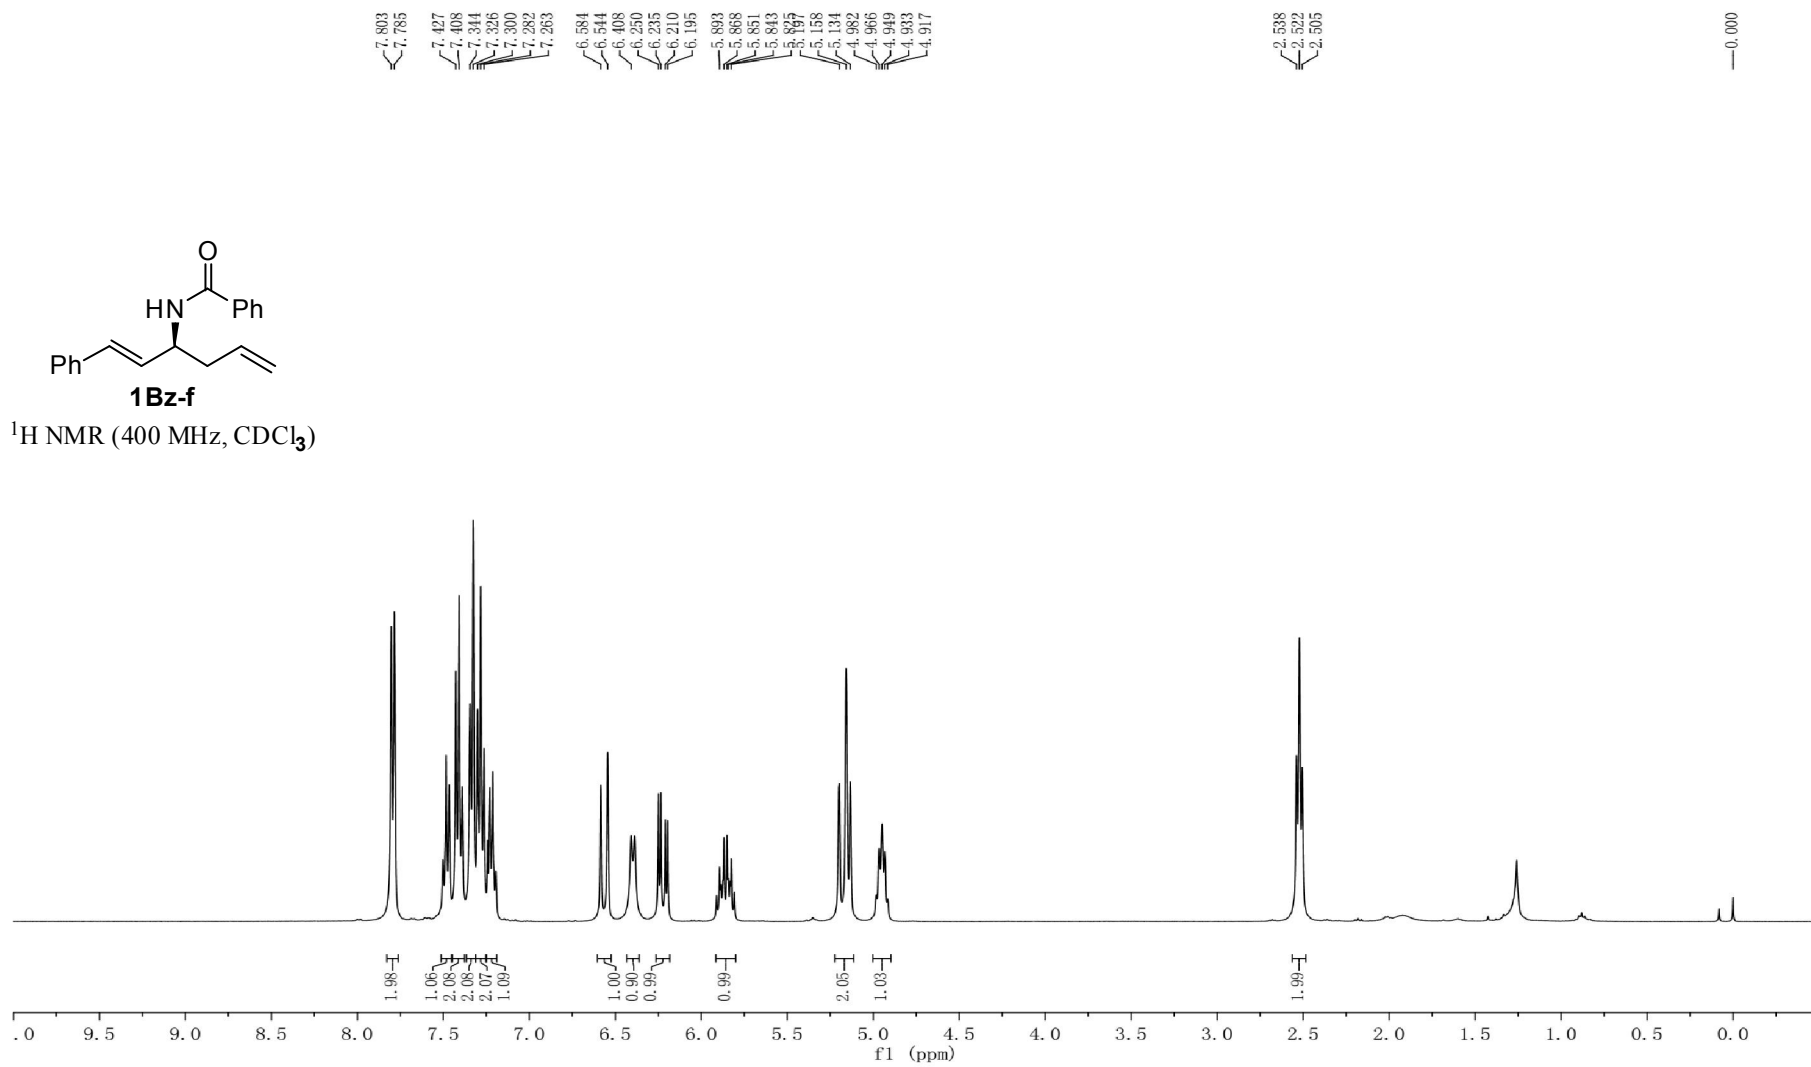

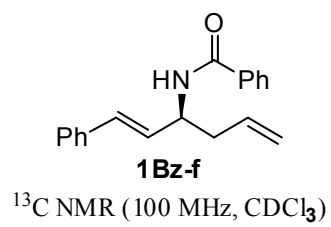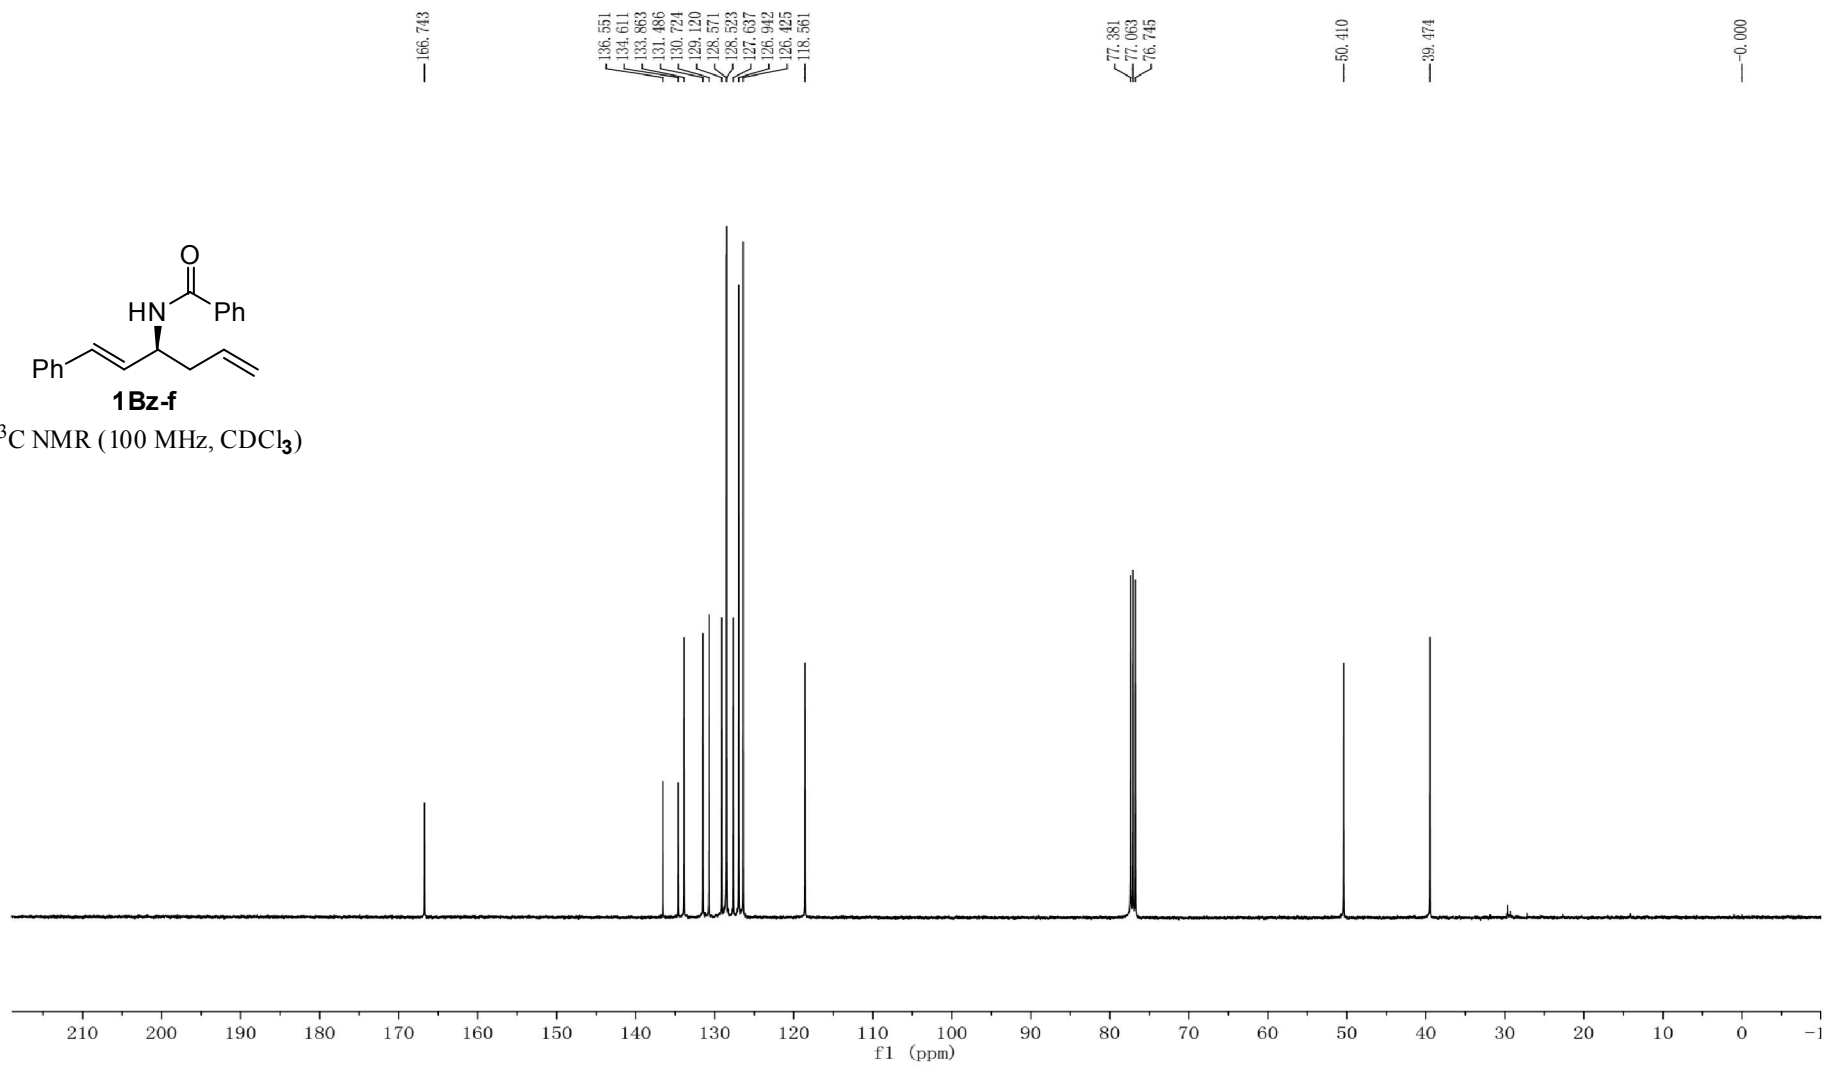



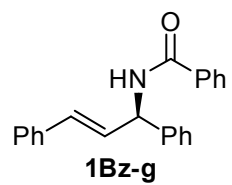

<sup>1</sup>H NMR (400 MHz, CDCl<sub>3</sub>)

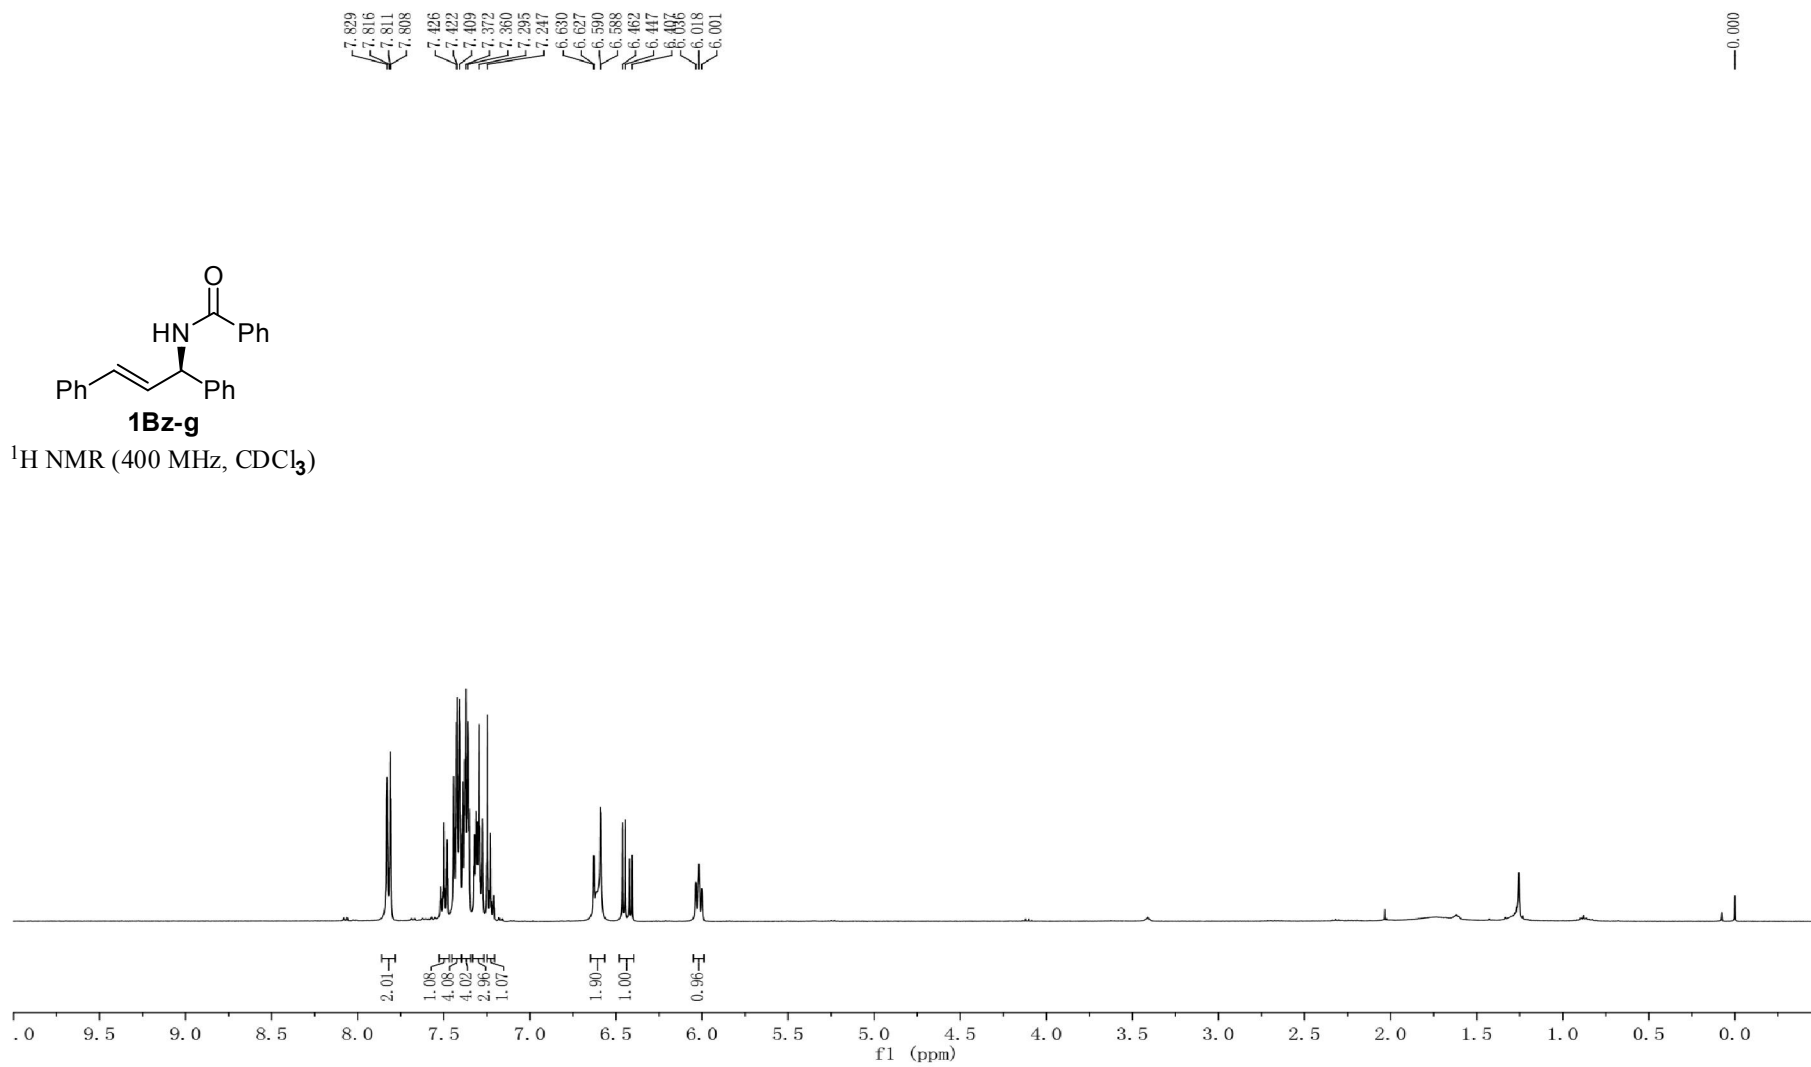

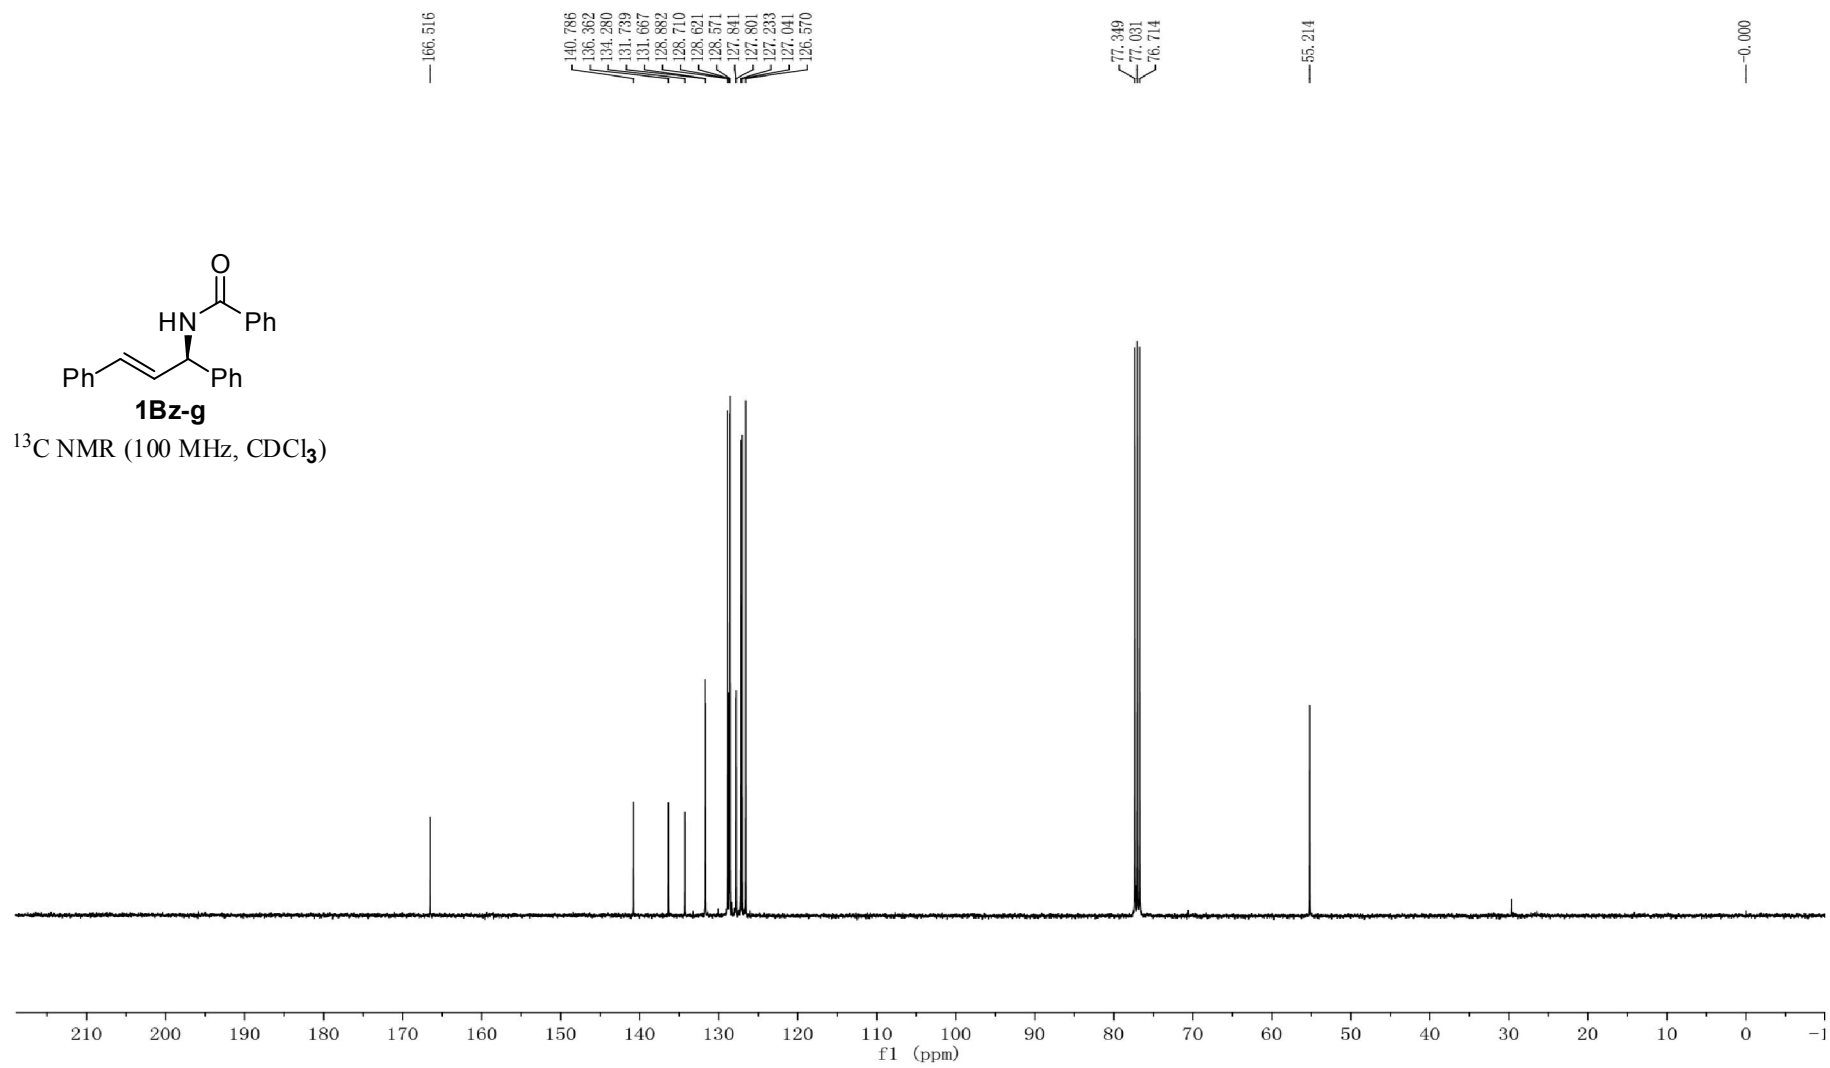

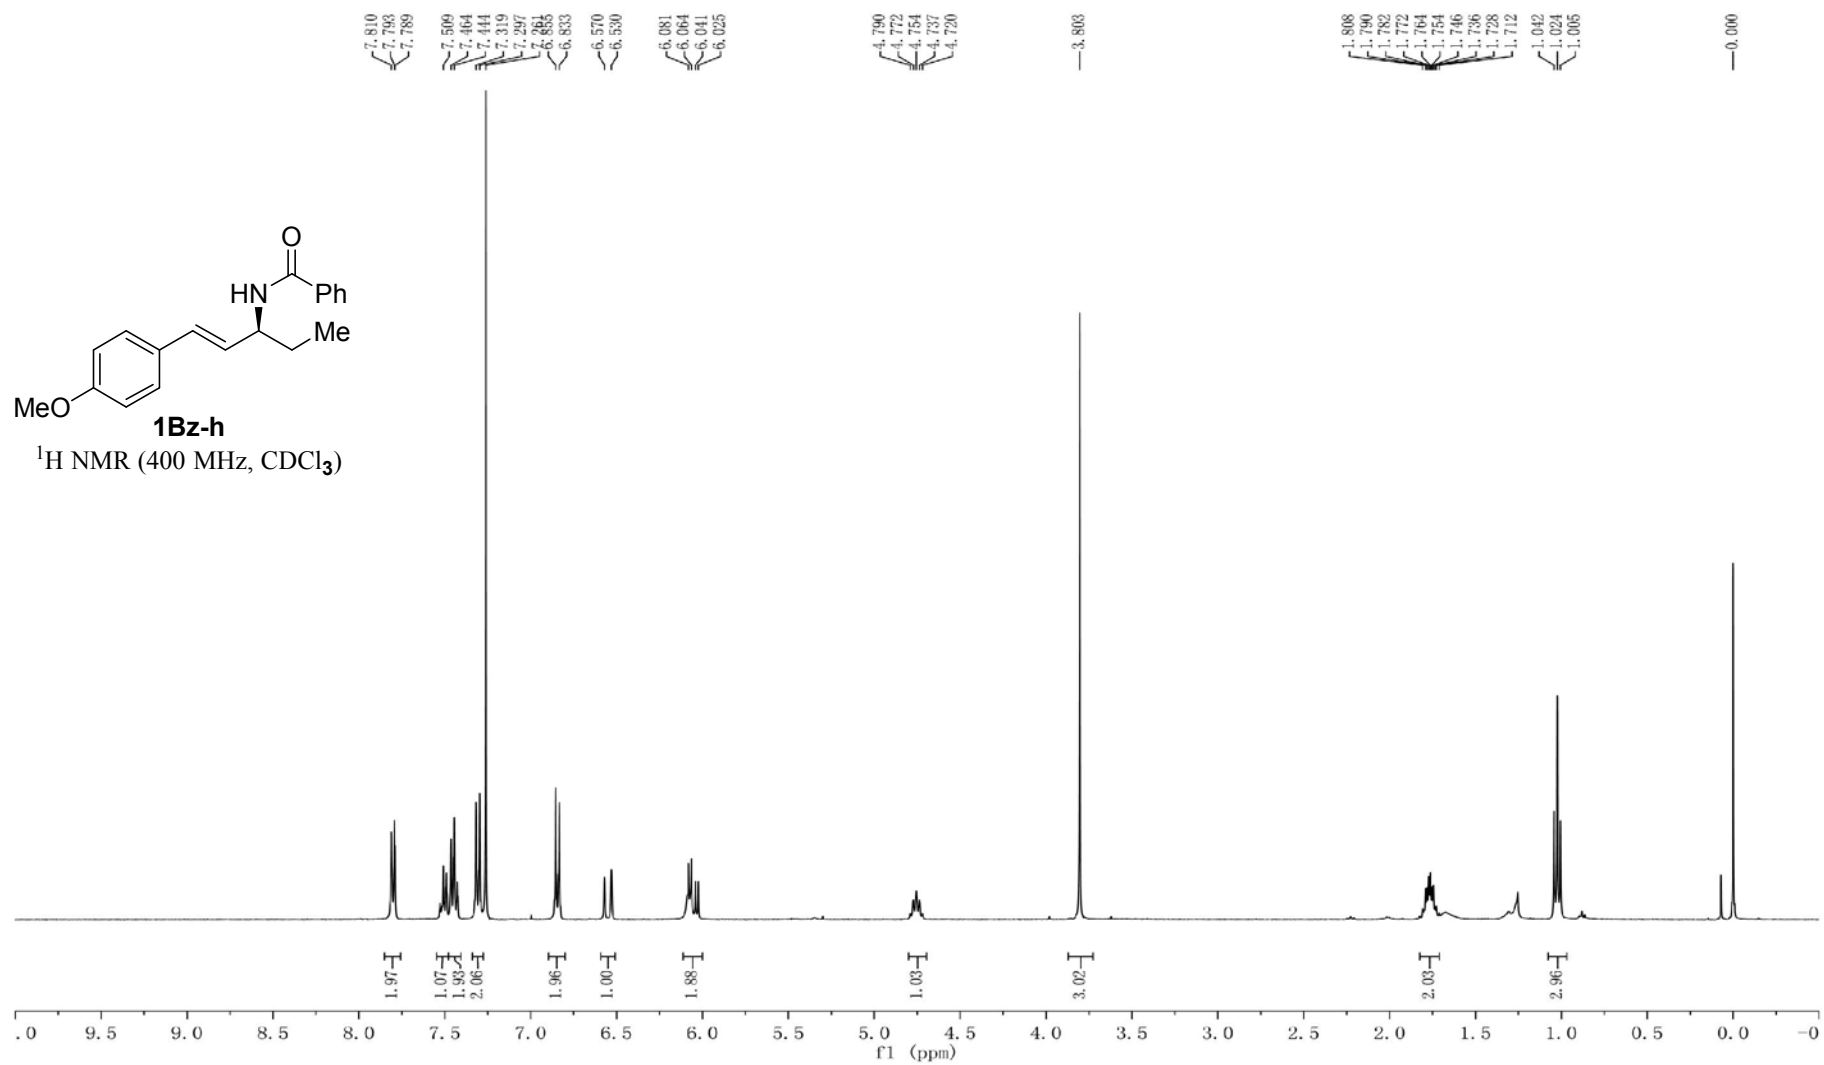

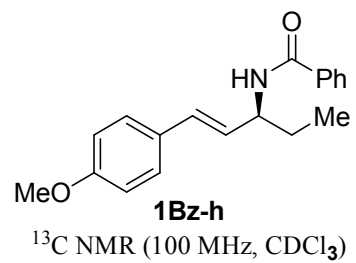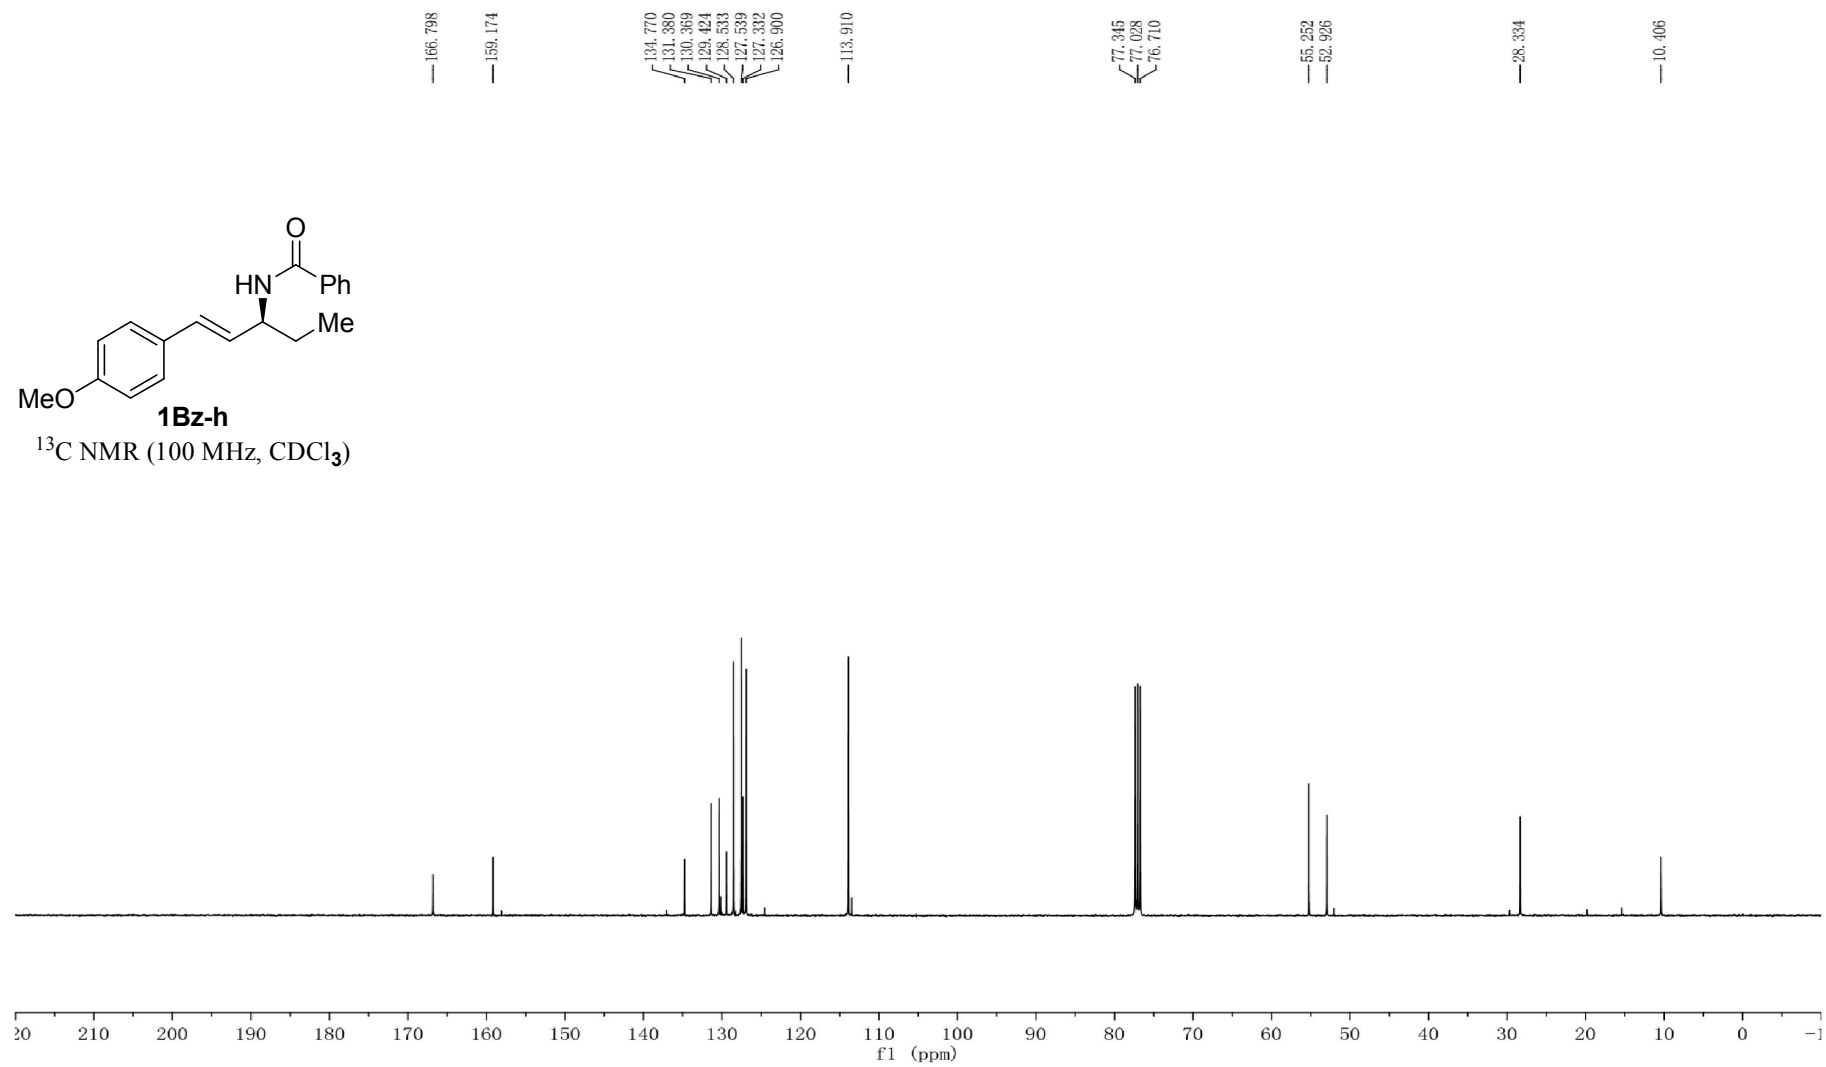

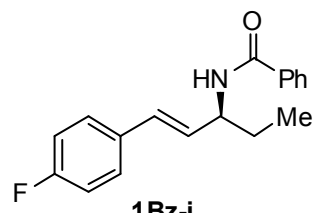

$^1\text{H NMR}$  (400 MHz,  $\text{CDCl}_3$ )

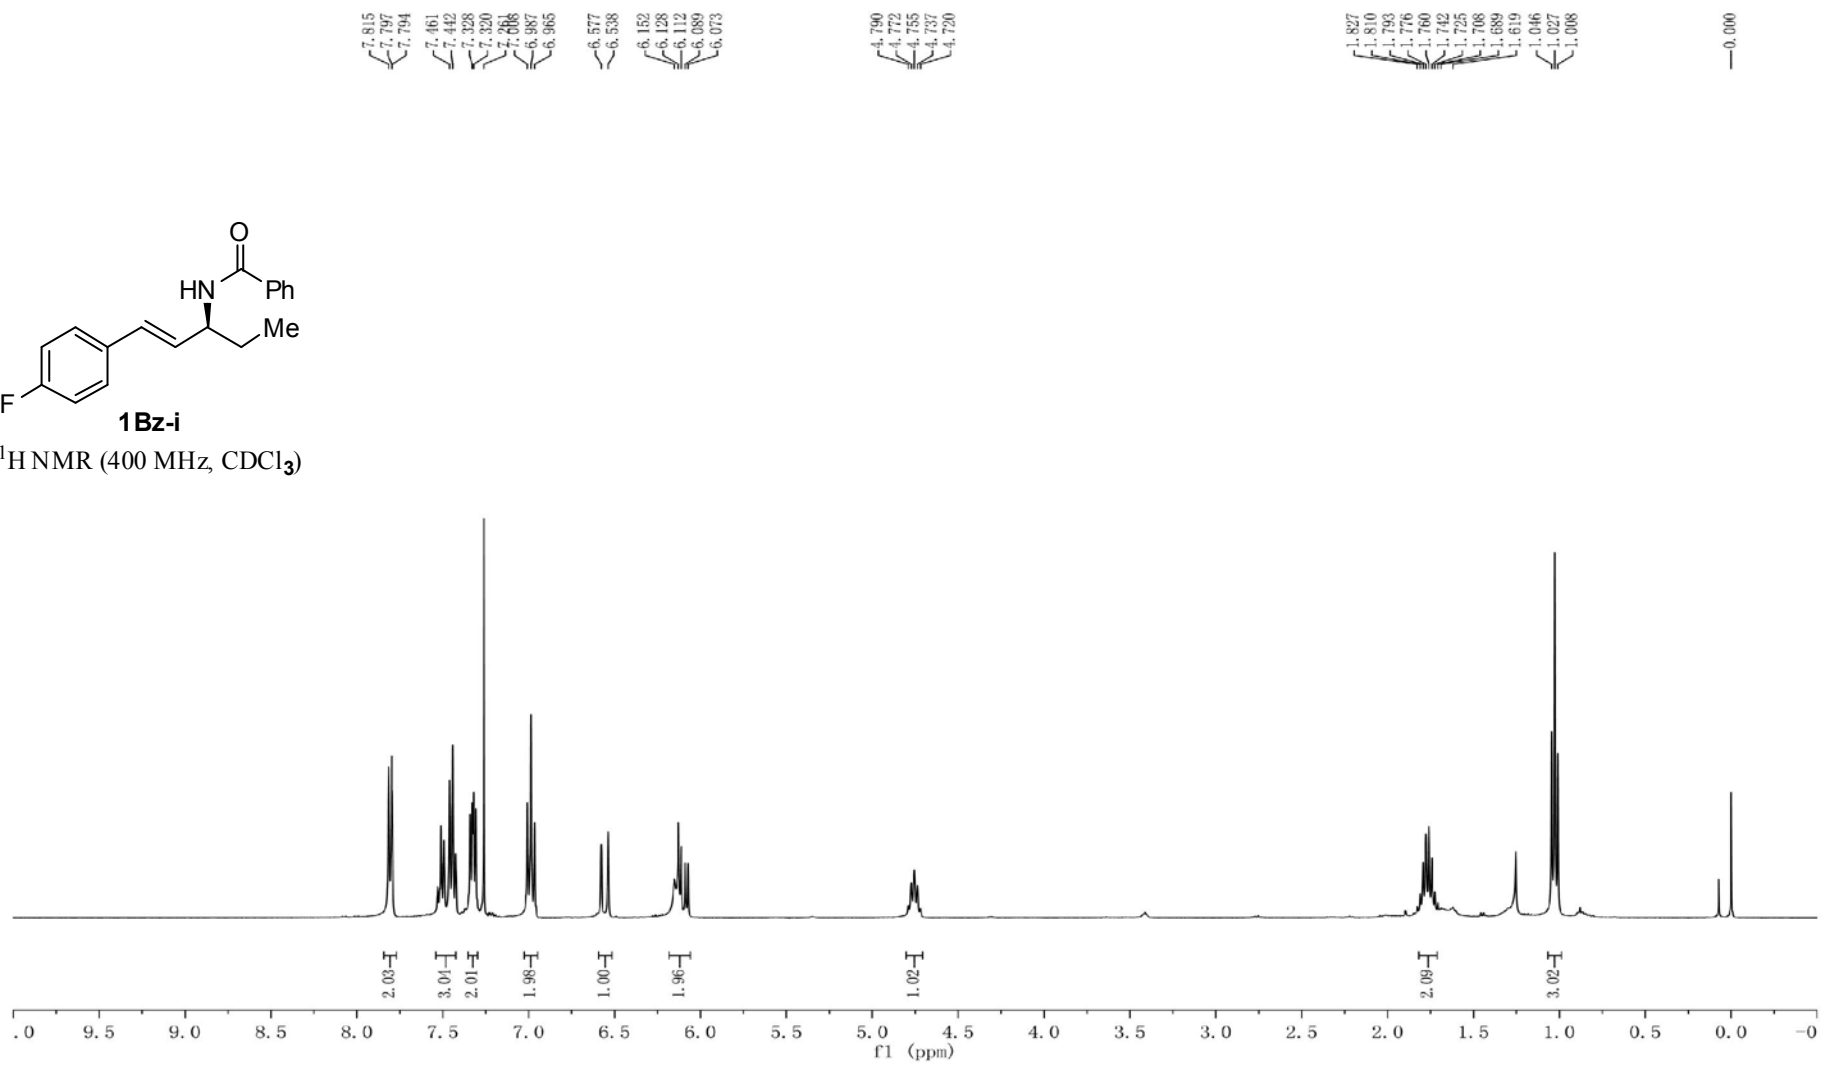

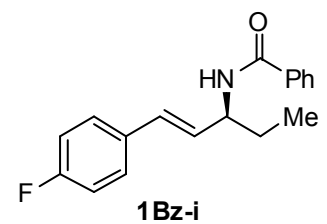

$^{13}\text{C}$  NMR (100 MHz,  $\text{CDCl}_3$ )

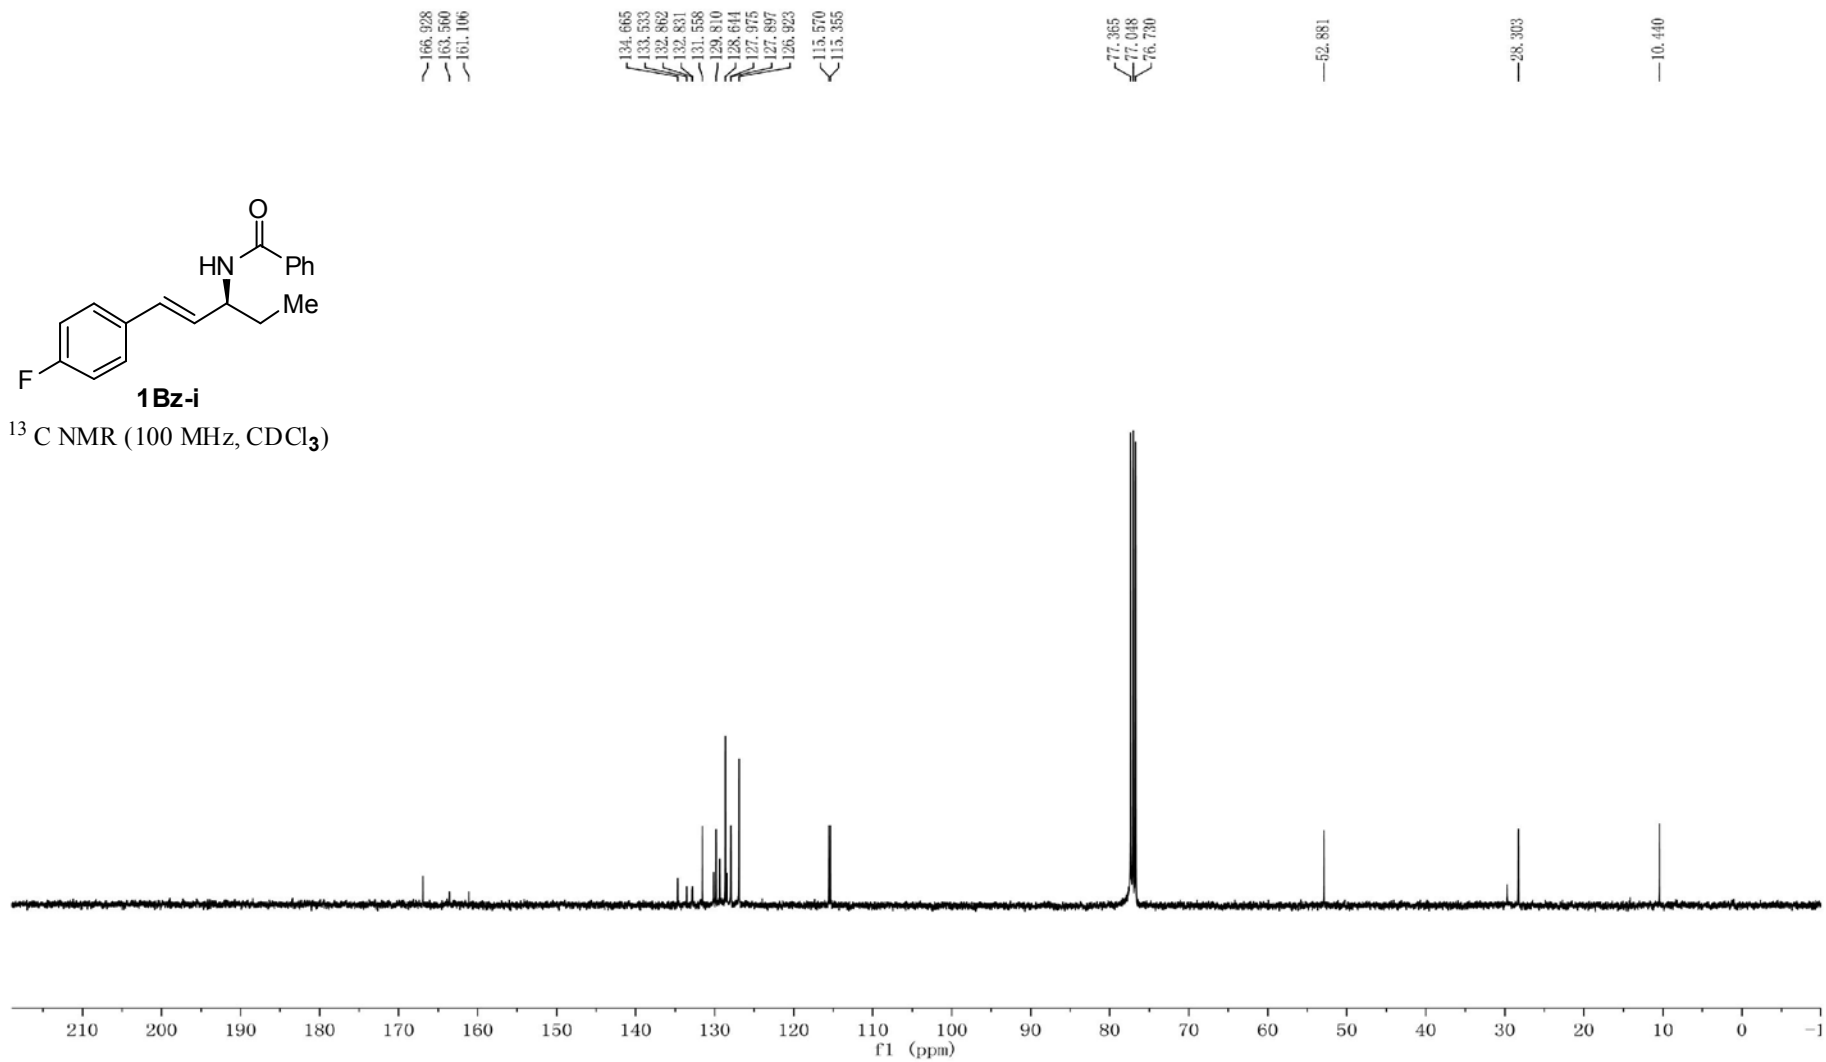

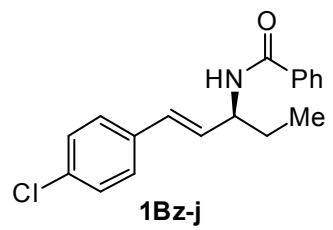

$^1\text{H NMR}$  (400 MHz,  $\text{CDCl}_3$ )

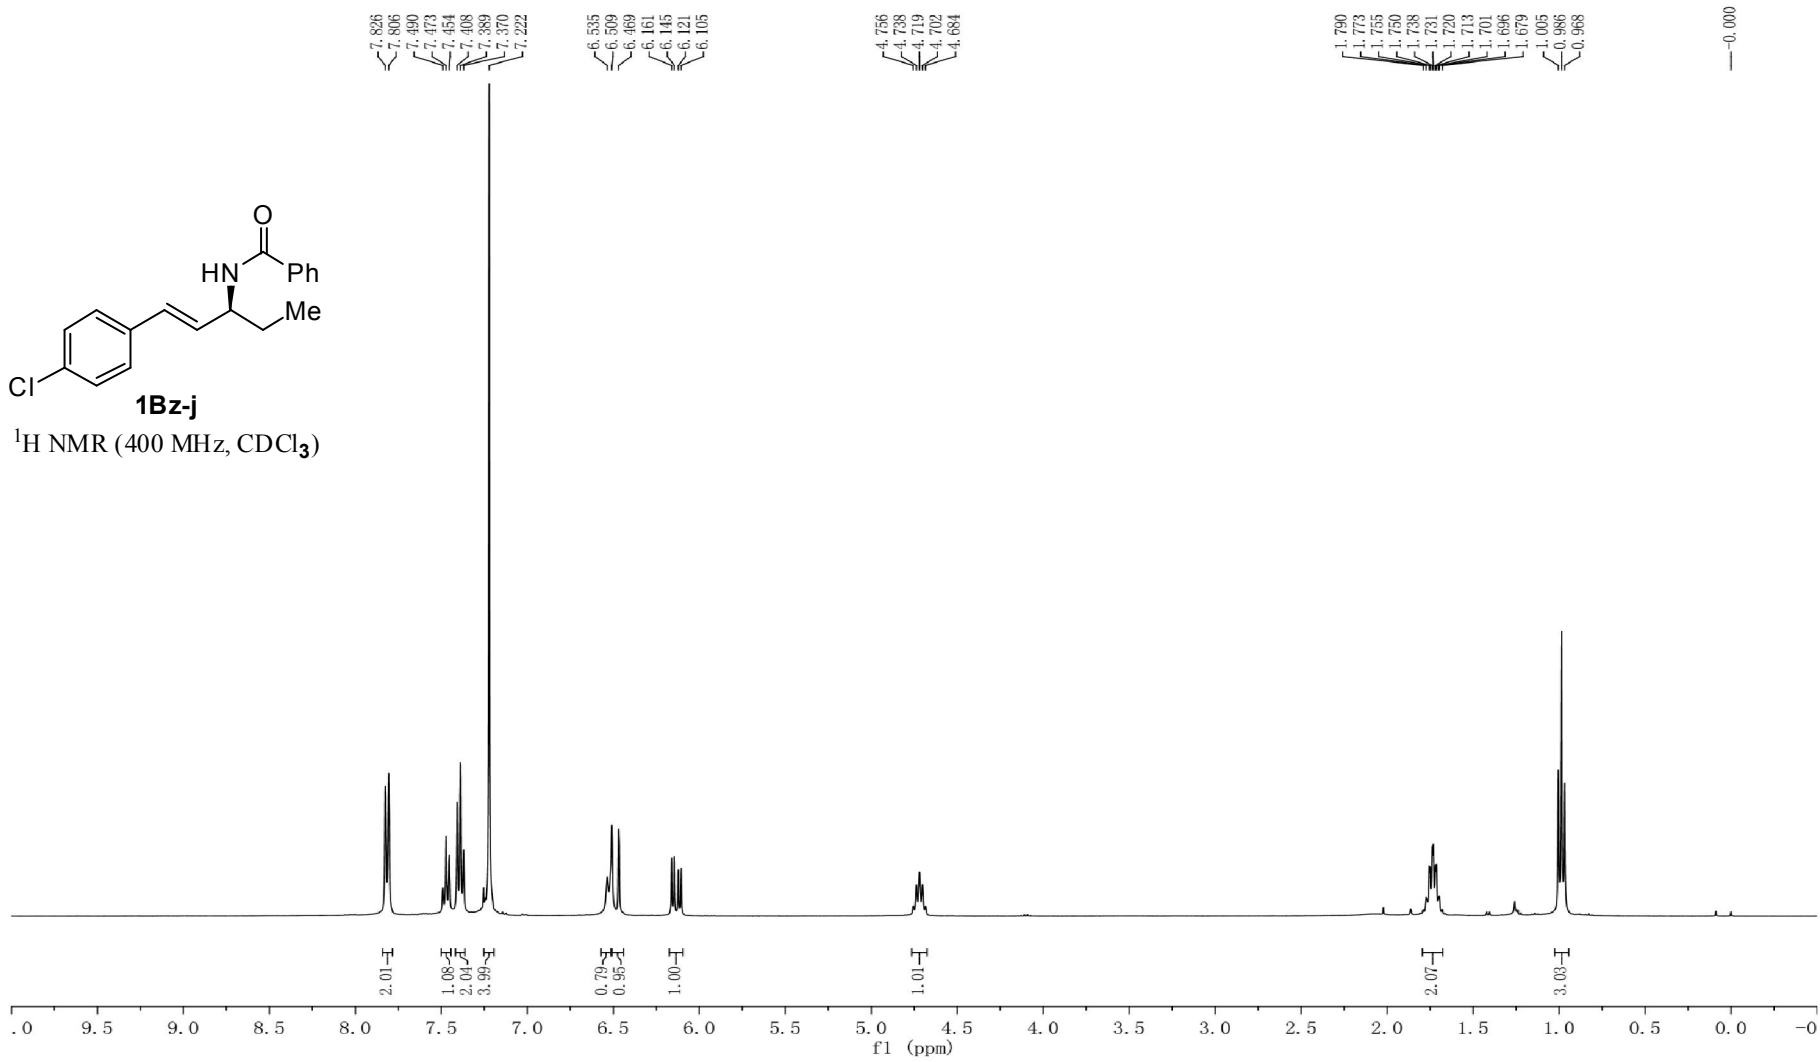

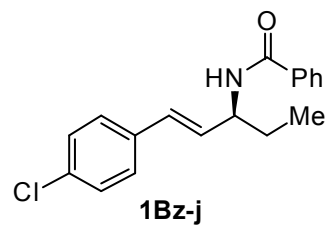

$^{13}\text{C}$  NMR (100 MHz,  $\text{CDCl}_3$ )

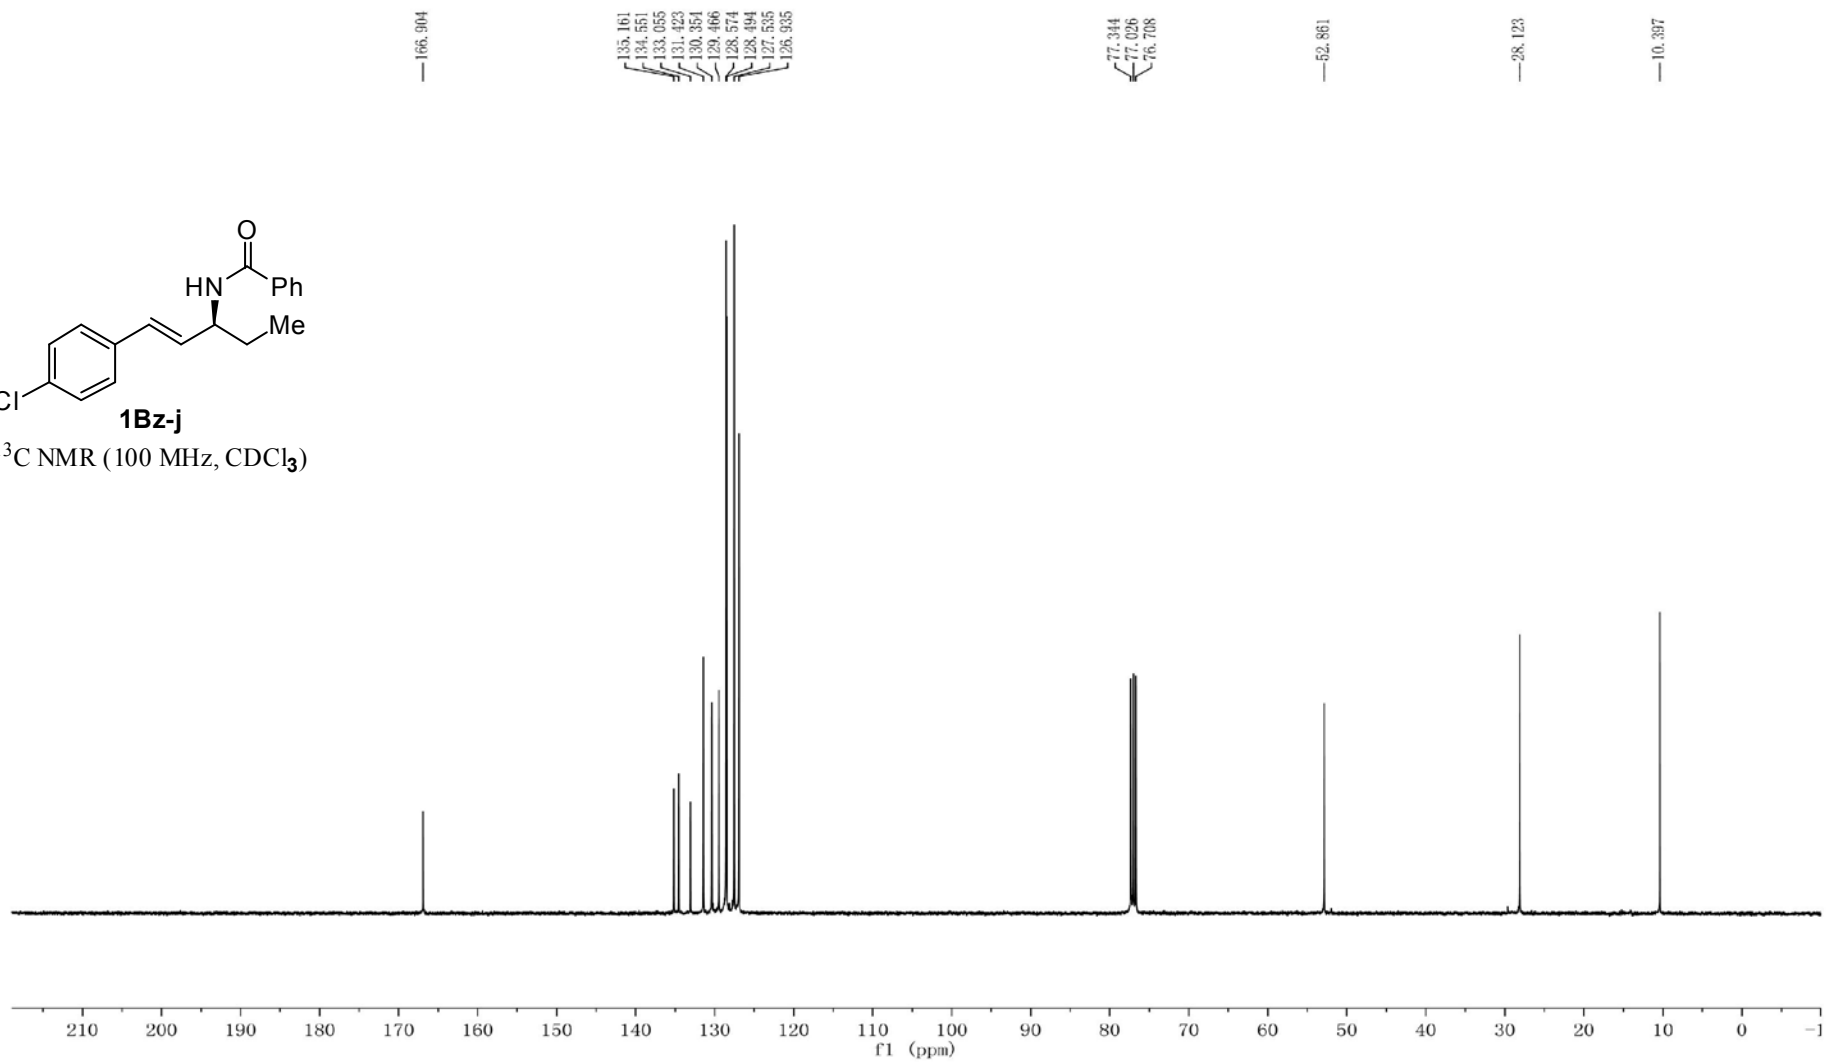



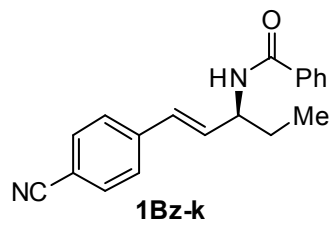

<sup>1</sup>H NMR (400 MHz, CDCl<sub>3</sub>)

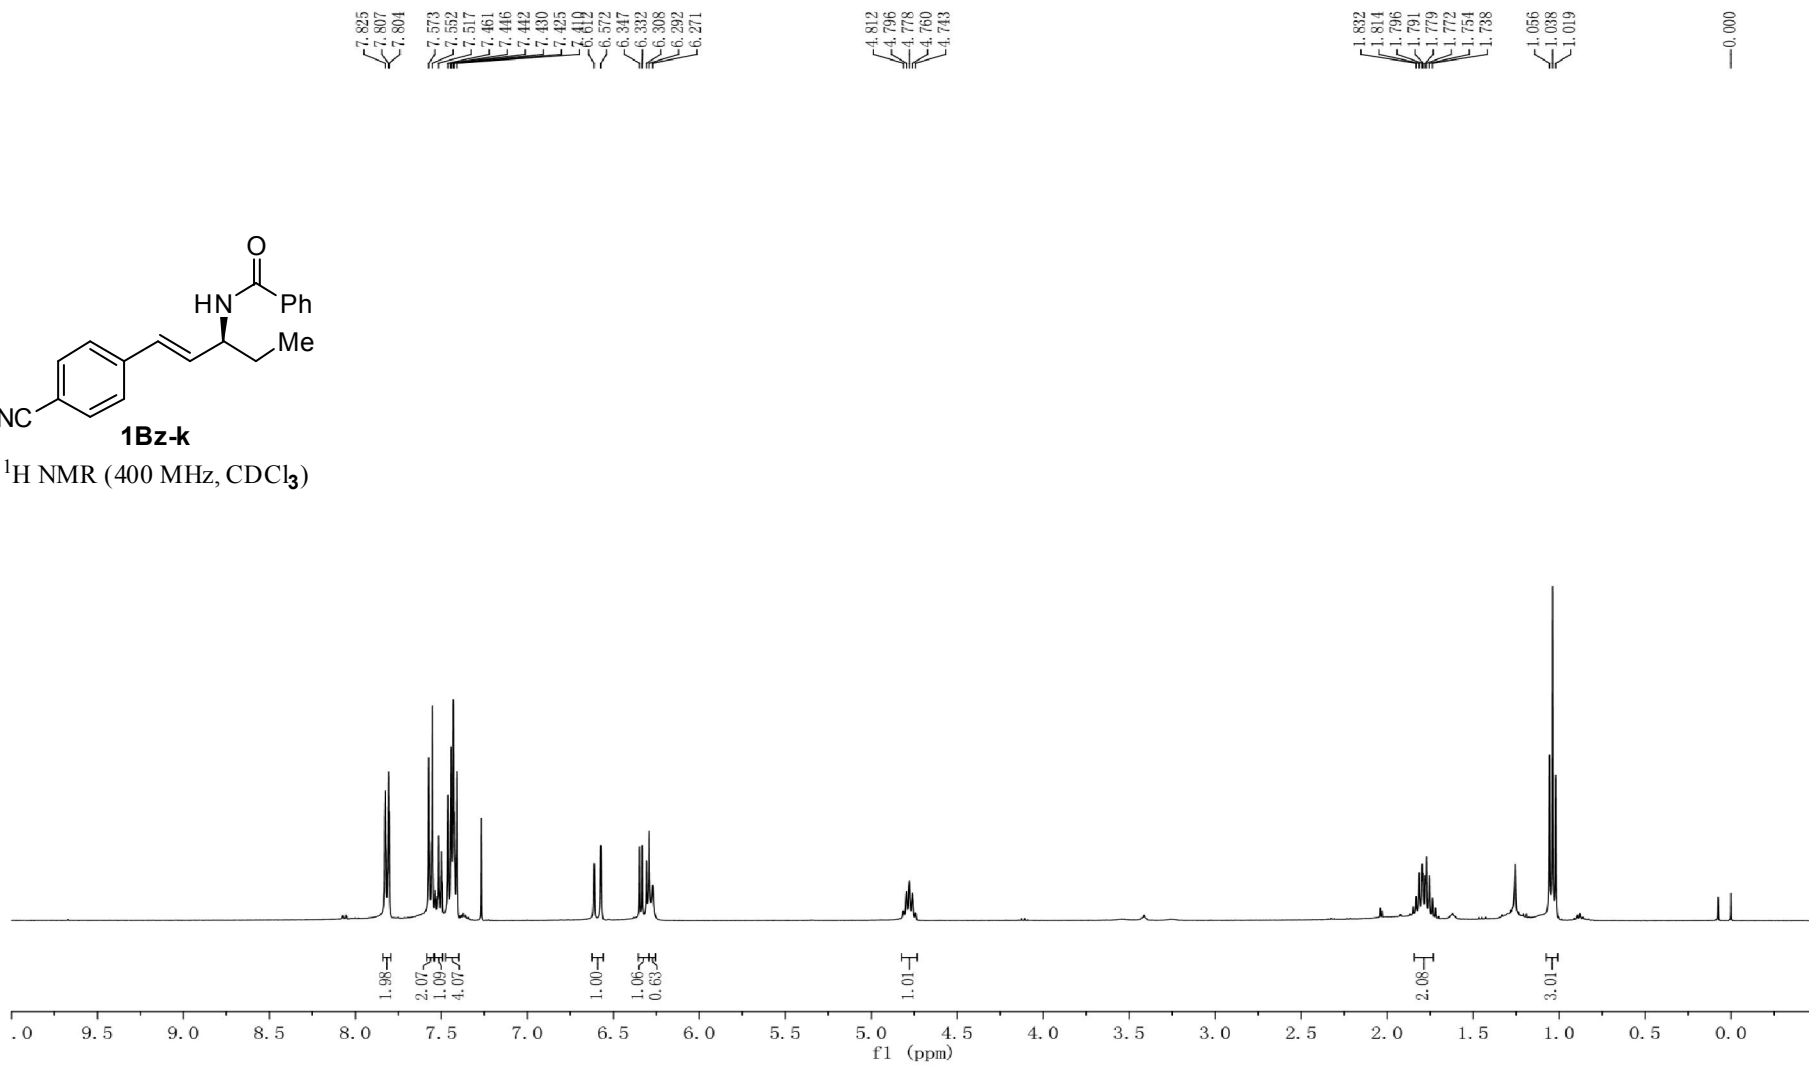

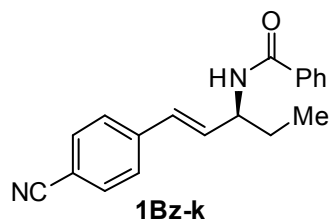

$^{13}\text{C}$  NMR (100 MHz,  $\text{CDCl}_3$ )

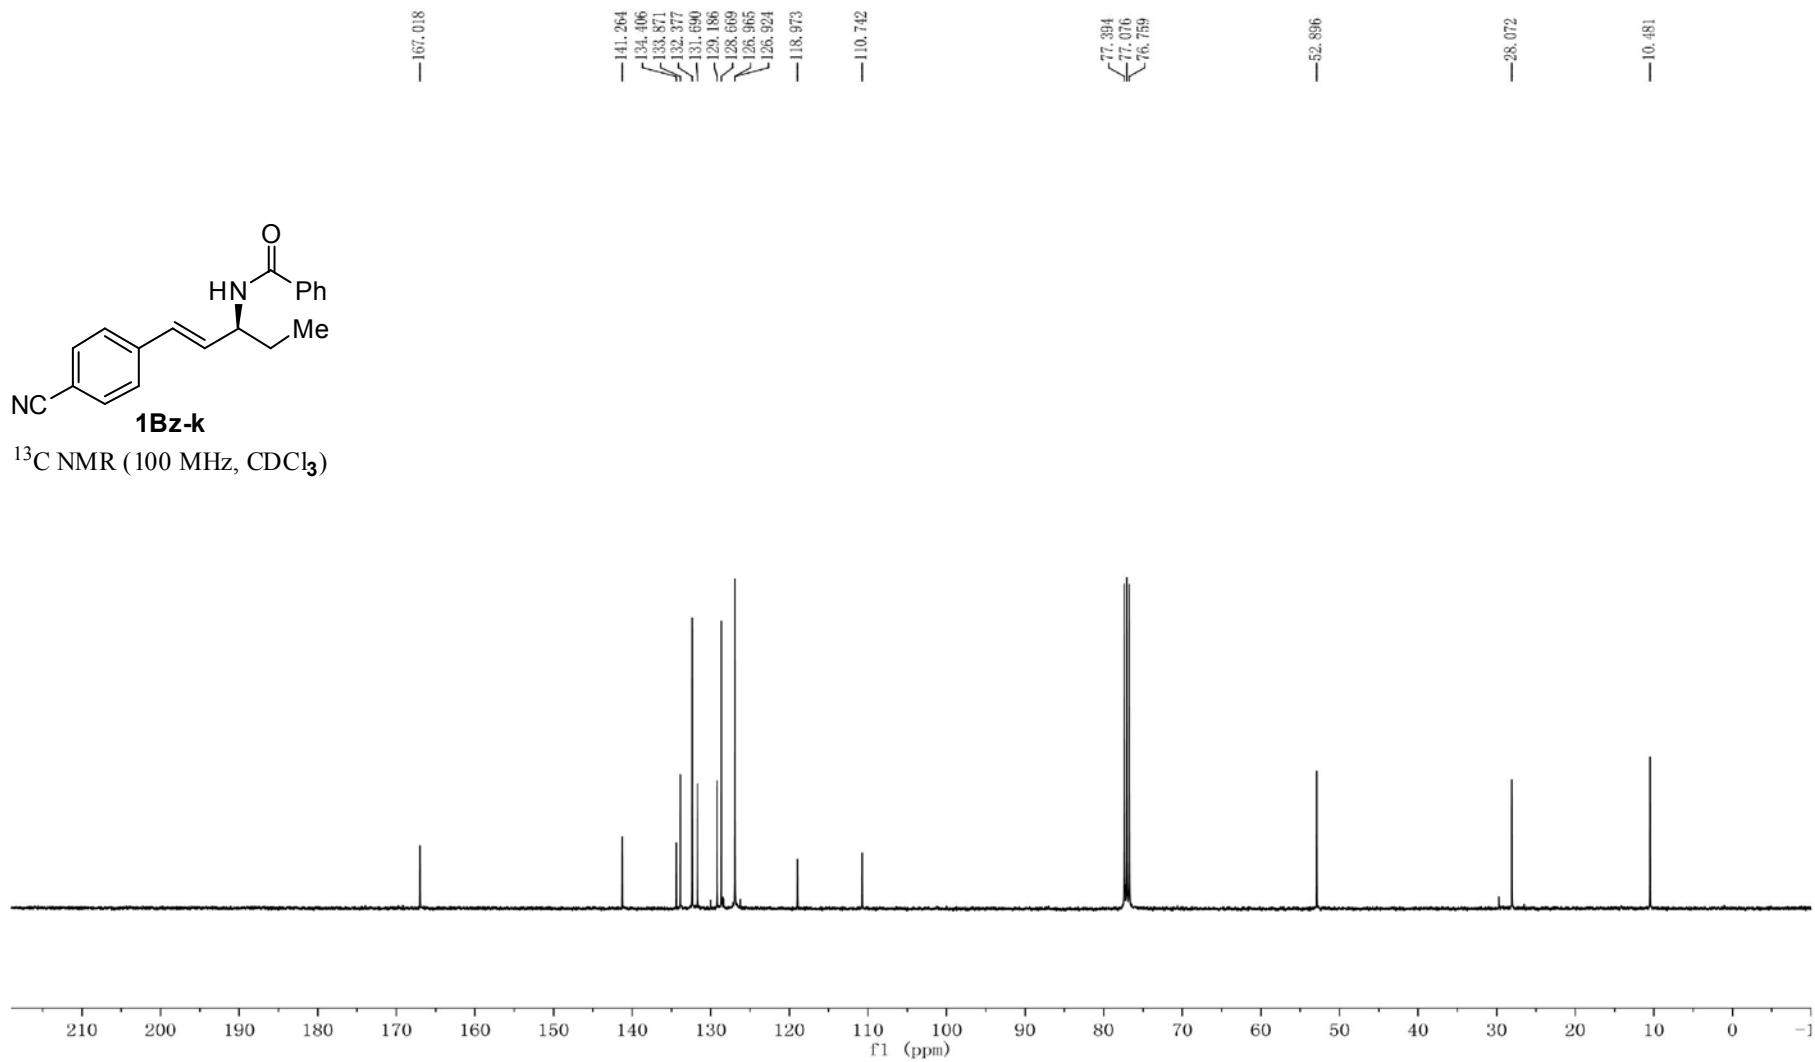

7.829  
7.812  
7.808  
7.788  
7.781  
7.776  
7.769  
7.748  
7.706  
7.575  
7.571  
7.554  
7.550  
7.515  
7.512  
7.503  
7.496  
7.491  
7.478  
7.473  
7.466  
7.462  
7.447  
7.441  
7.432  
7.427  
7.417  
7.410  
7.400  
6.751  
6.711  
6.414  
6.400  
6.374  
6.360  
6.286  
6.266

5.063  
5.047  
5.030  
5.015  
4.998  
4.982

1.490  
1.473

-0.000

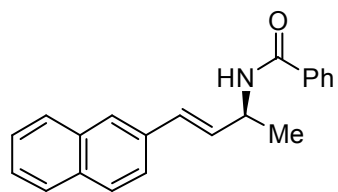

**1Bz-I**

<sup>1</sup>H NMR (400 MHz, CDCl<sub>3</sub>)

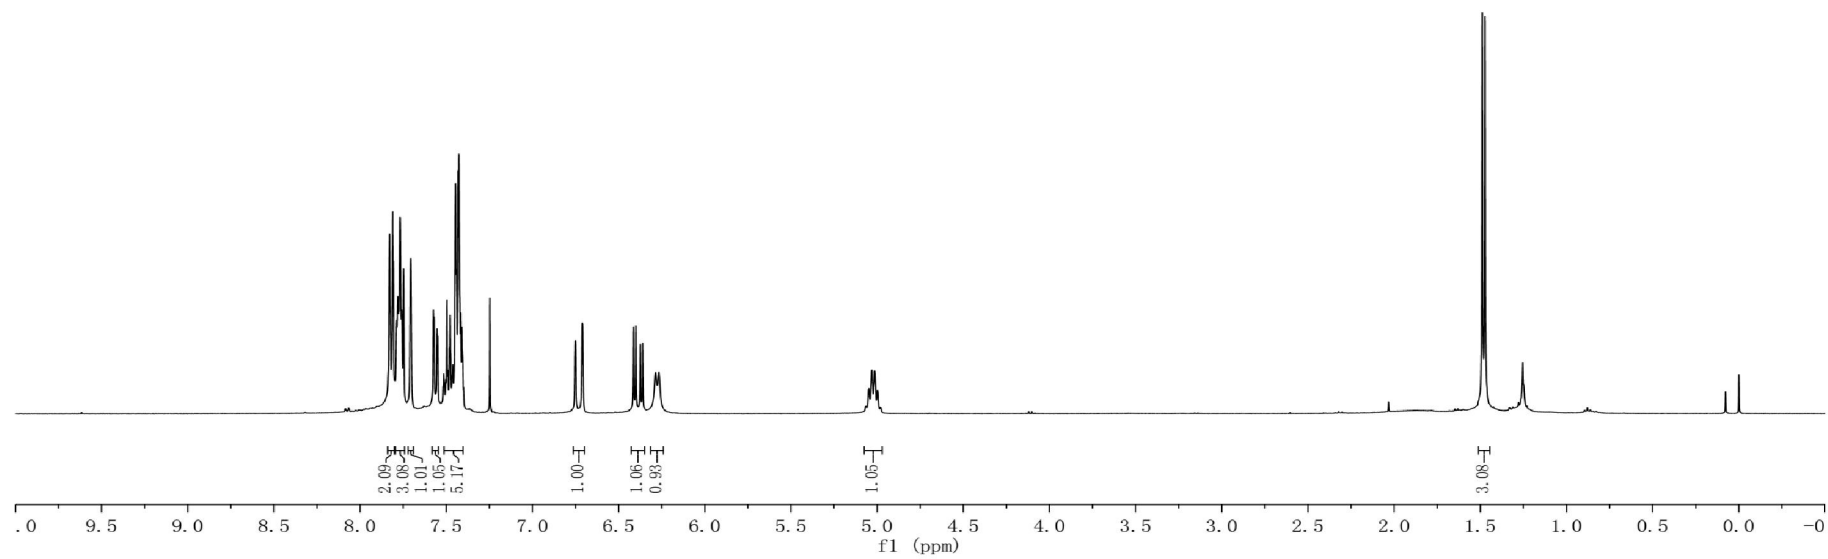

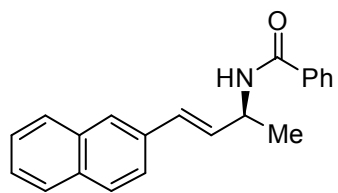

**1Bz-I**

$^{13}\text{C}$  NMR (100 MHz,  $\text{CDCl}_3$ )

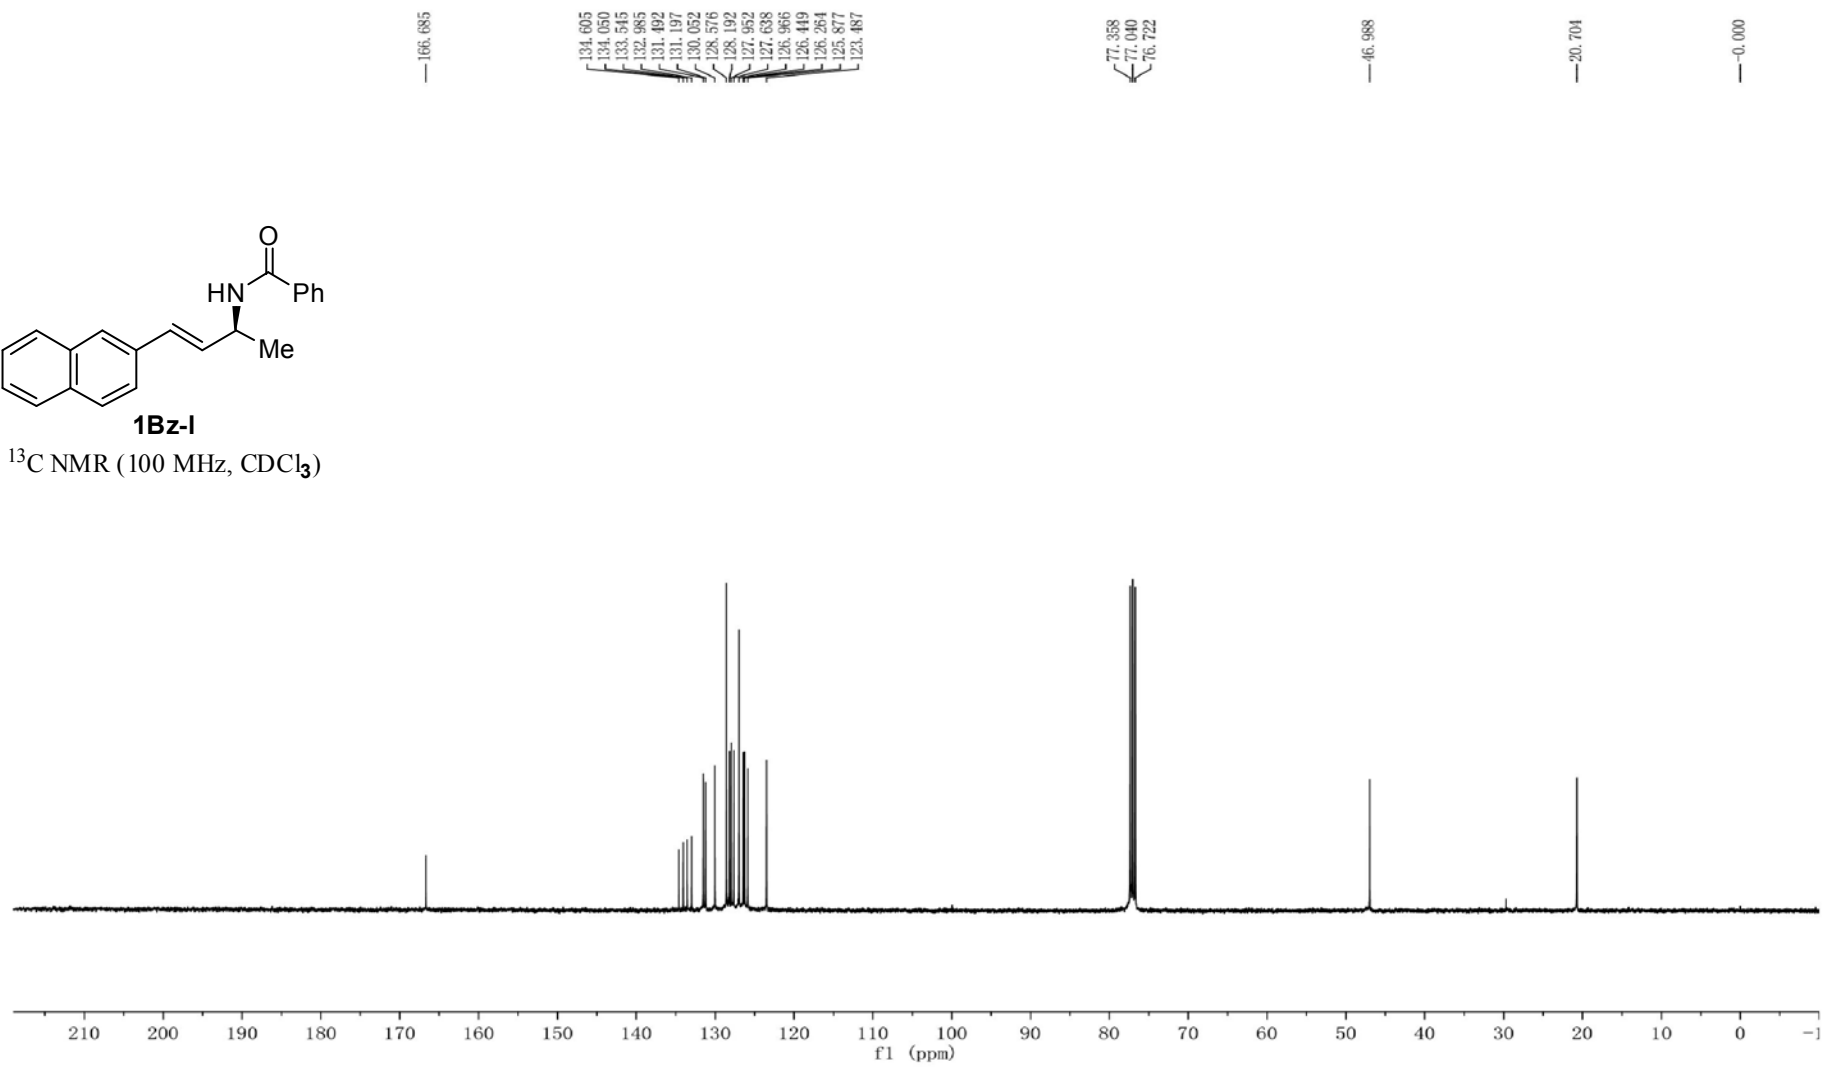

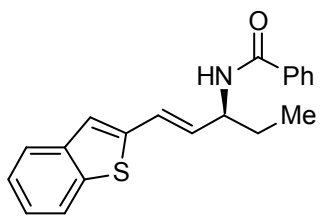

**1Bz-m**

<sup>1</sup>H NMR (400 MHz, CDCl<sub>3</sub>)

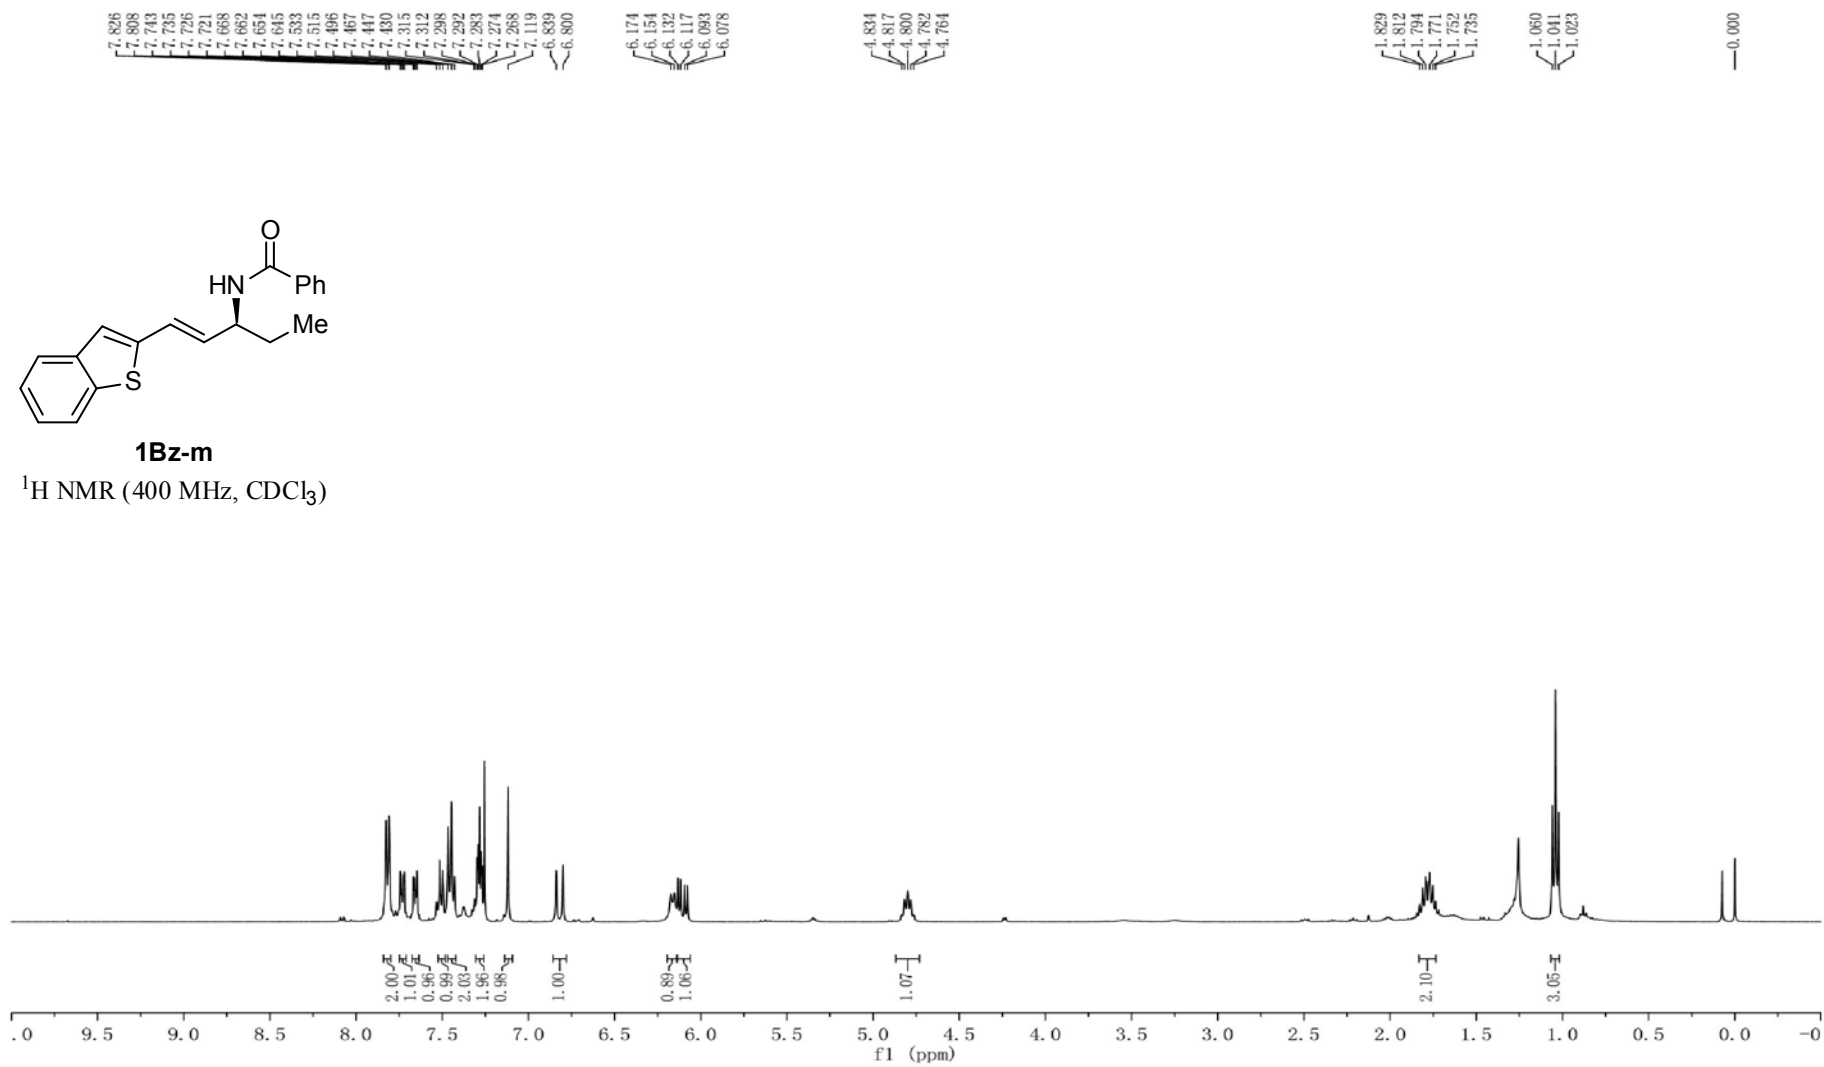

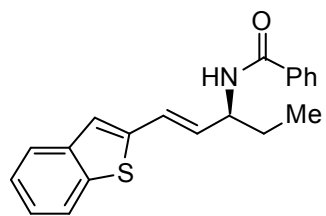

**1Bz-m**

$^{13}\text{C}$  NMR (100 MHz,  $\text{CDCl}_3$ )

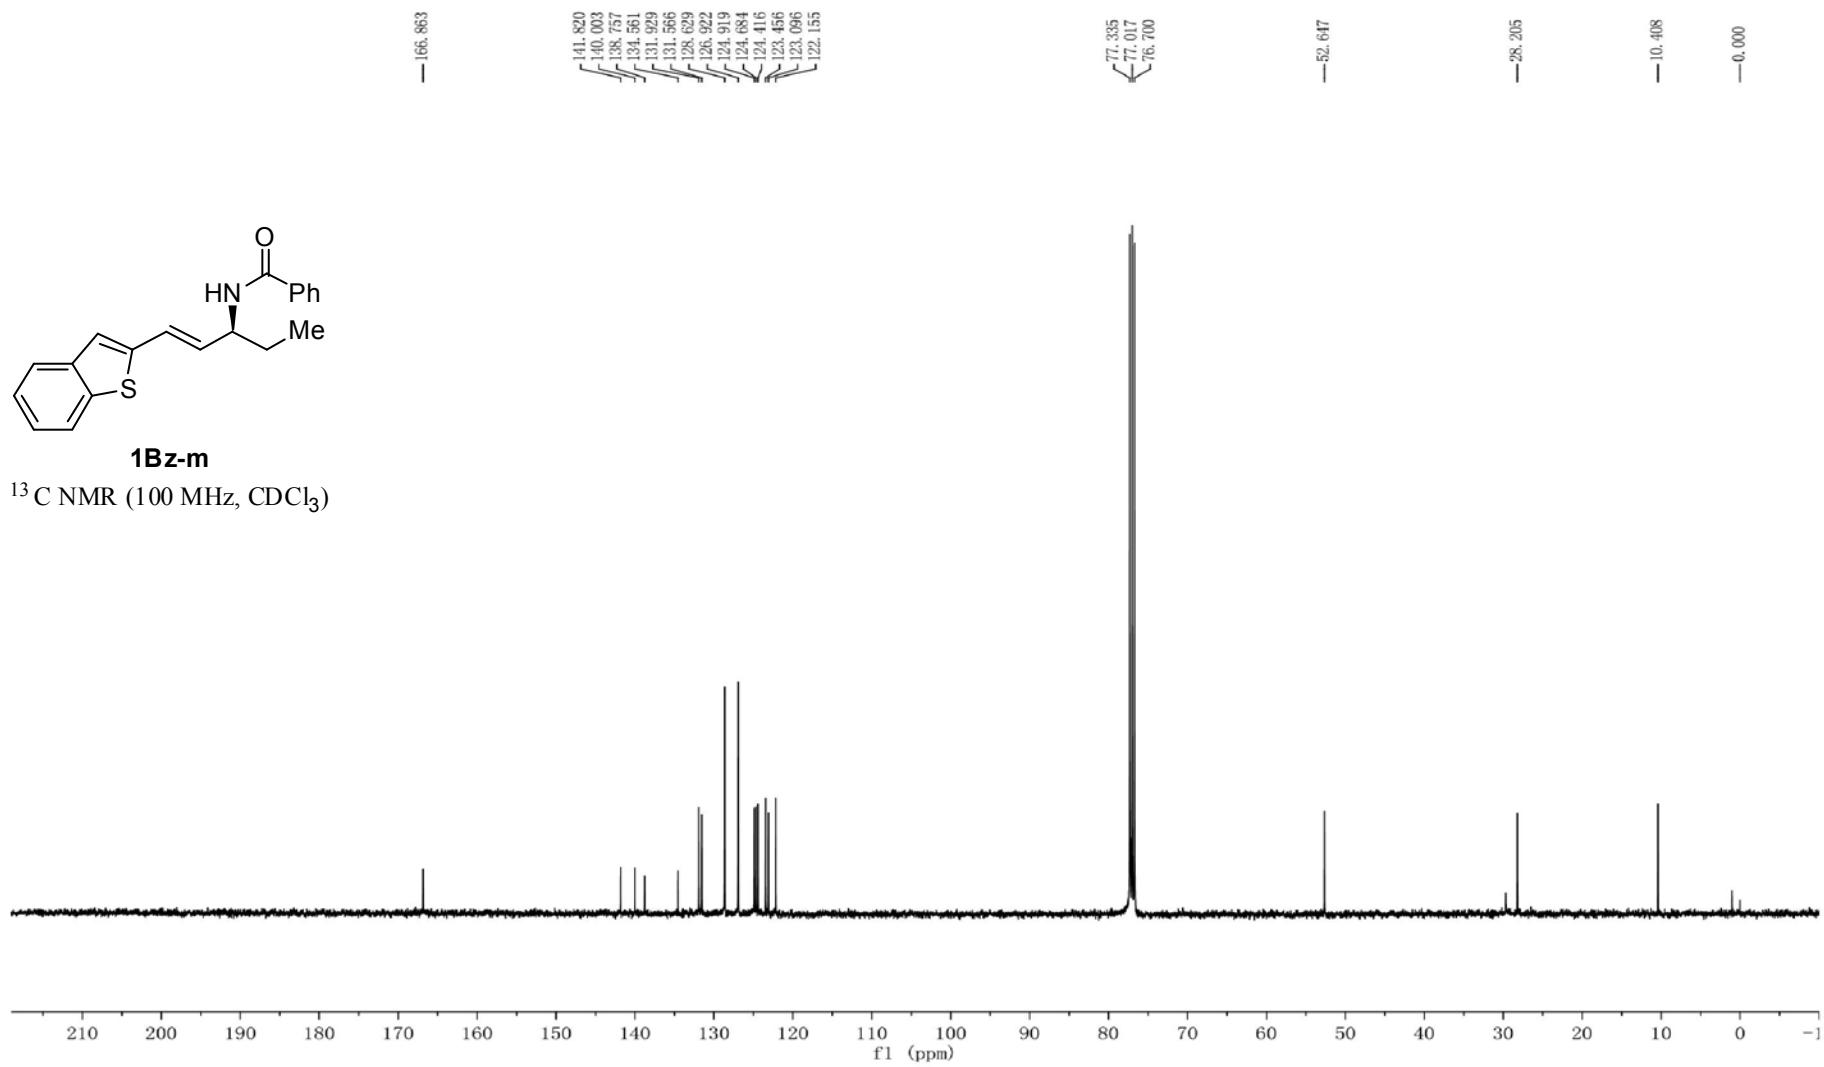

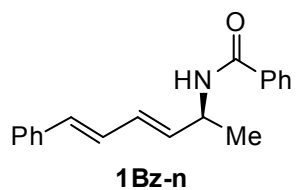

<sup>1</sup>H NMR (400 MHz, CDCl<sub>3</sub>)

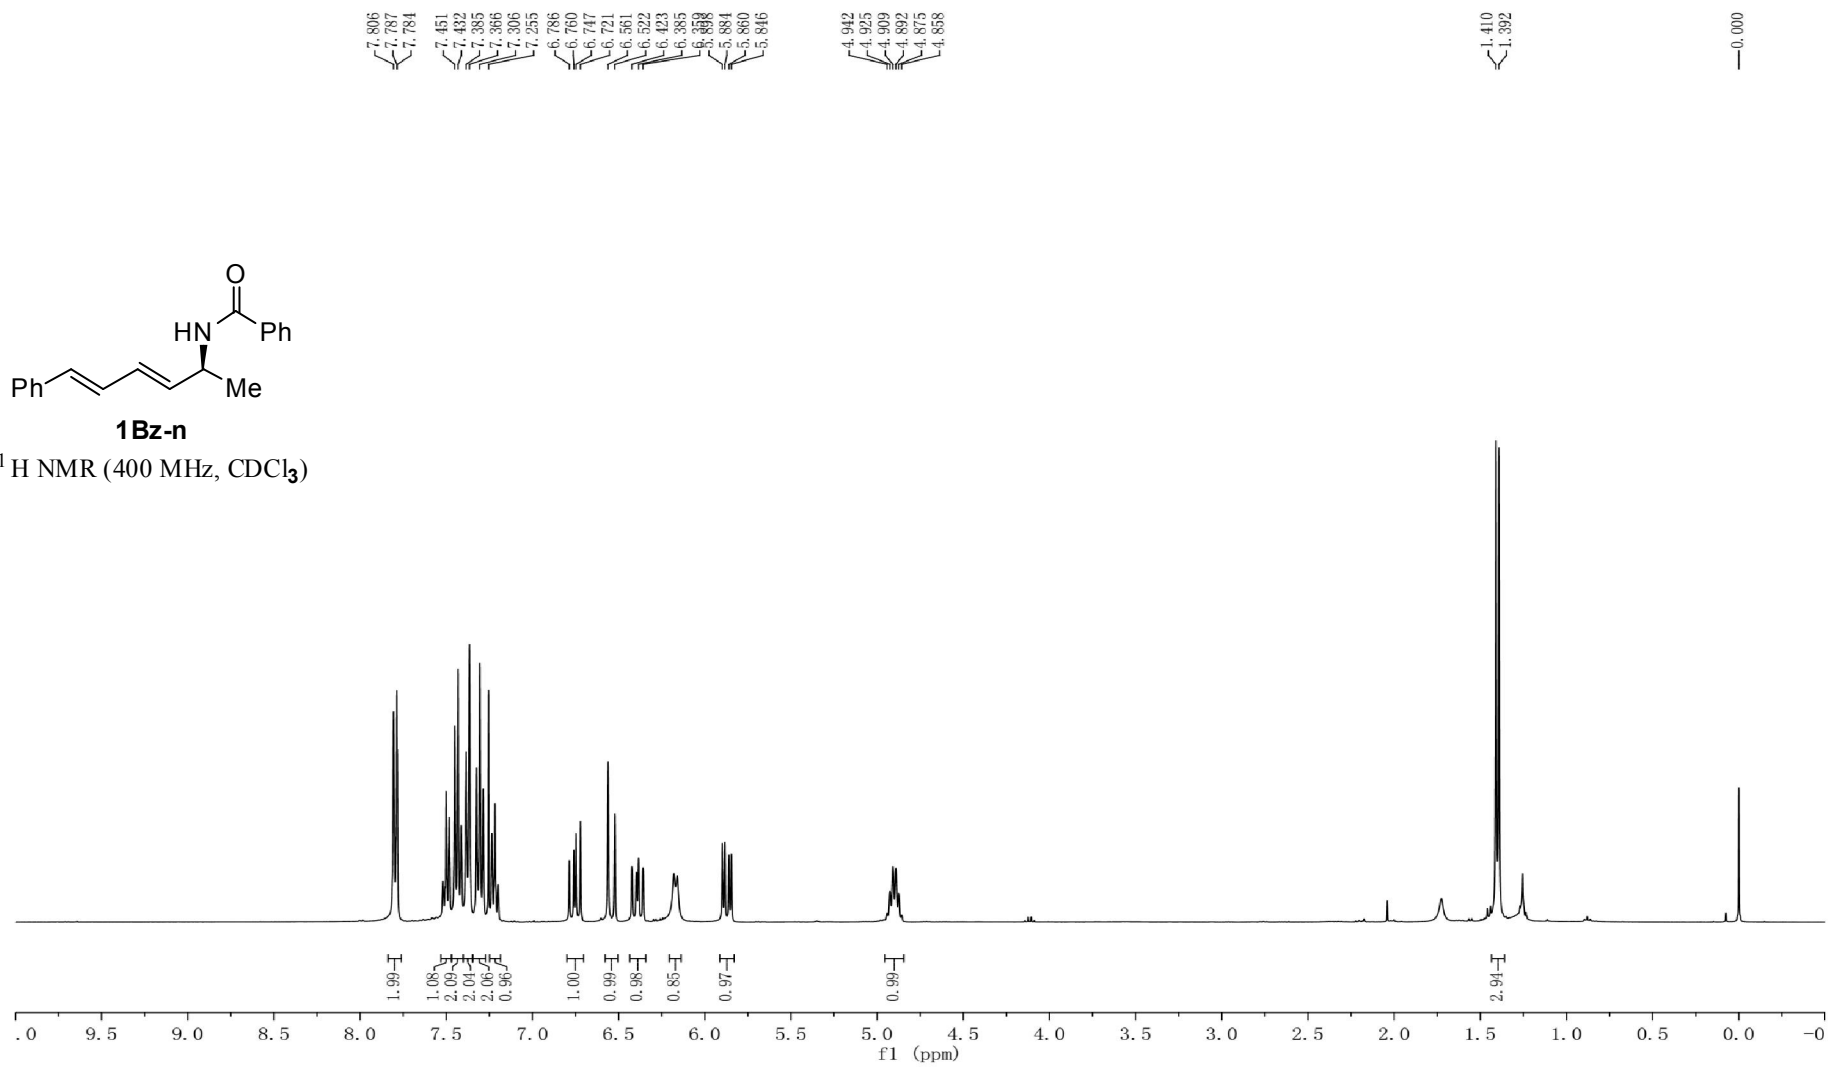

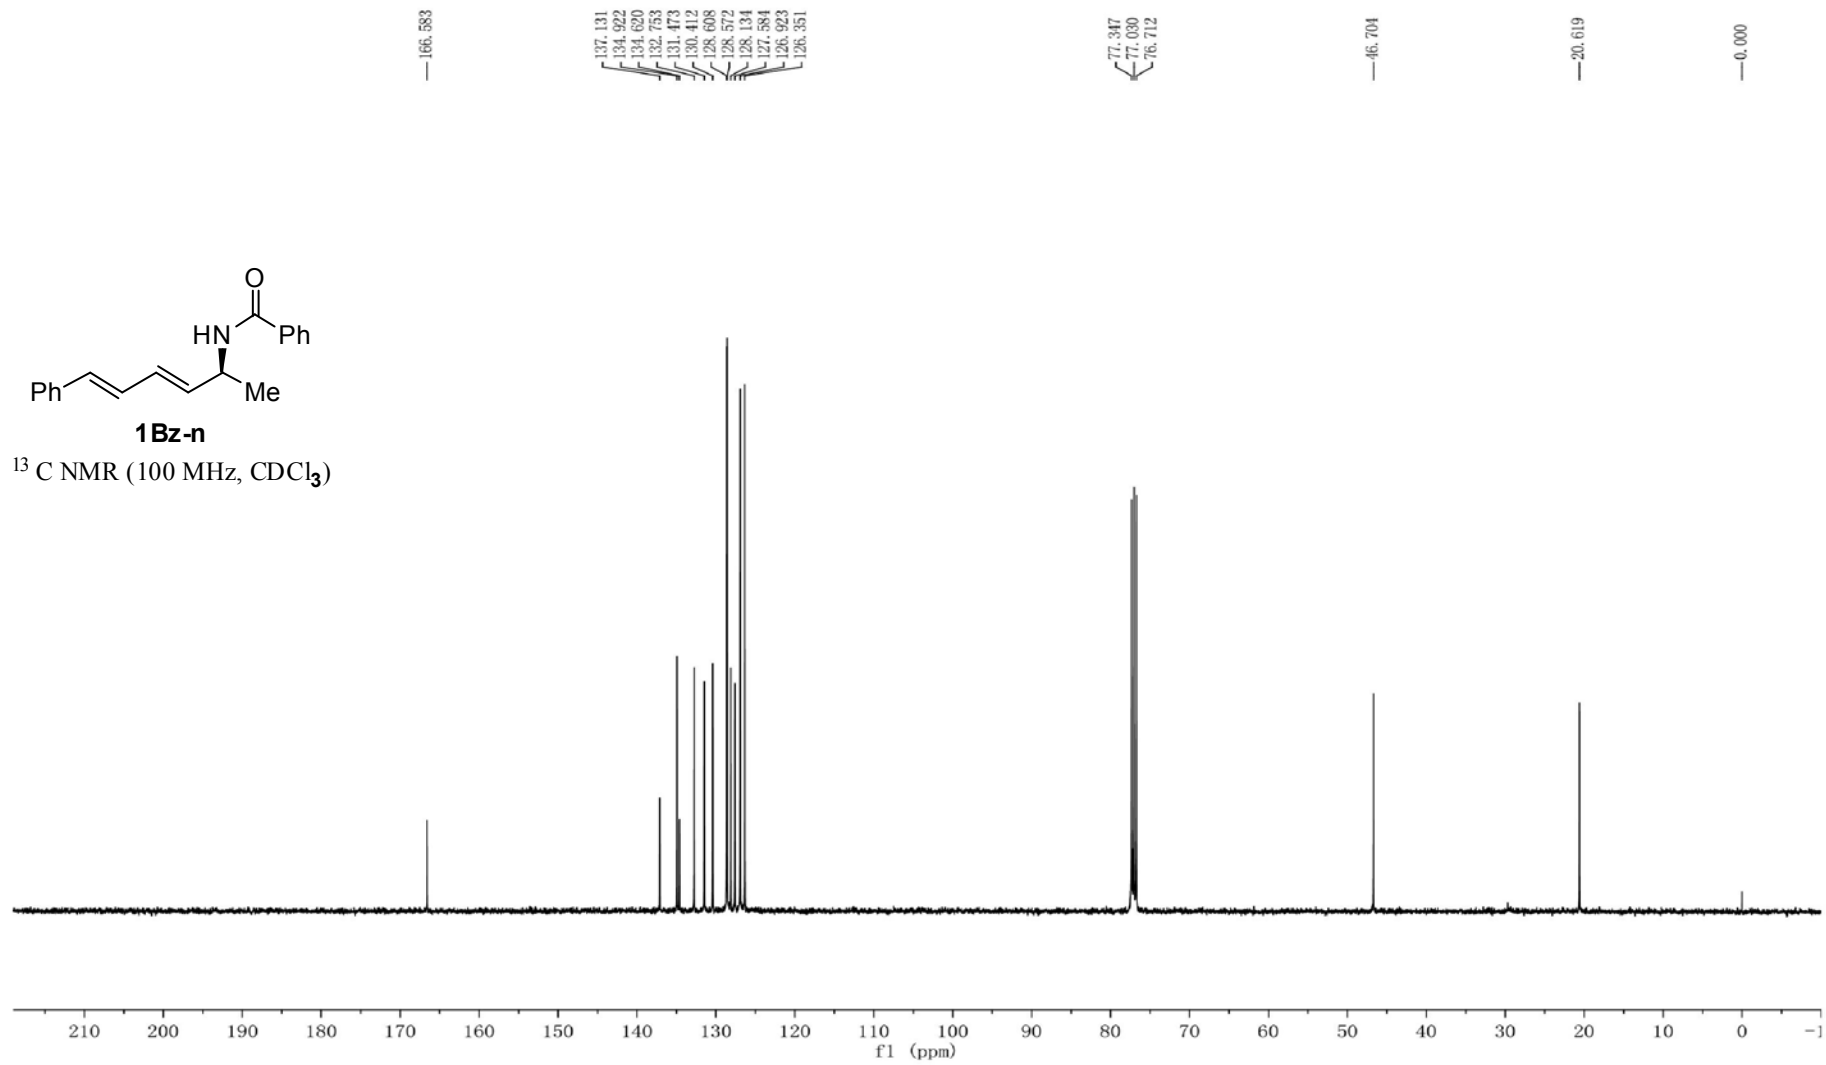



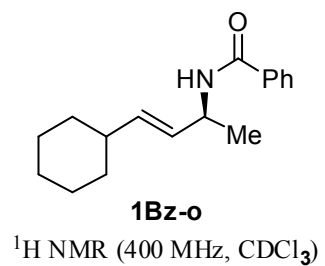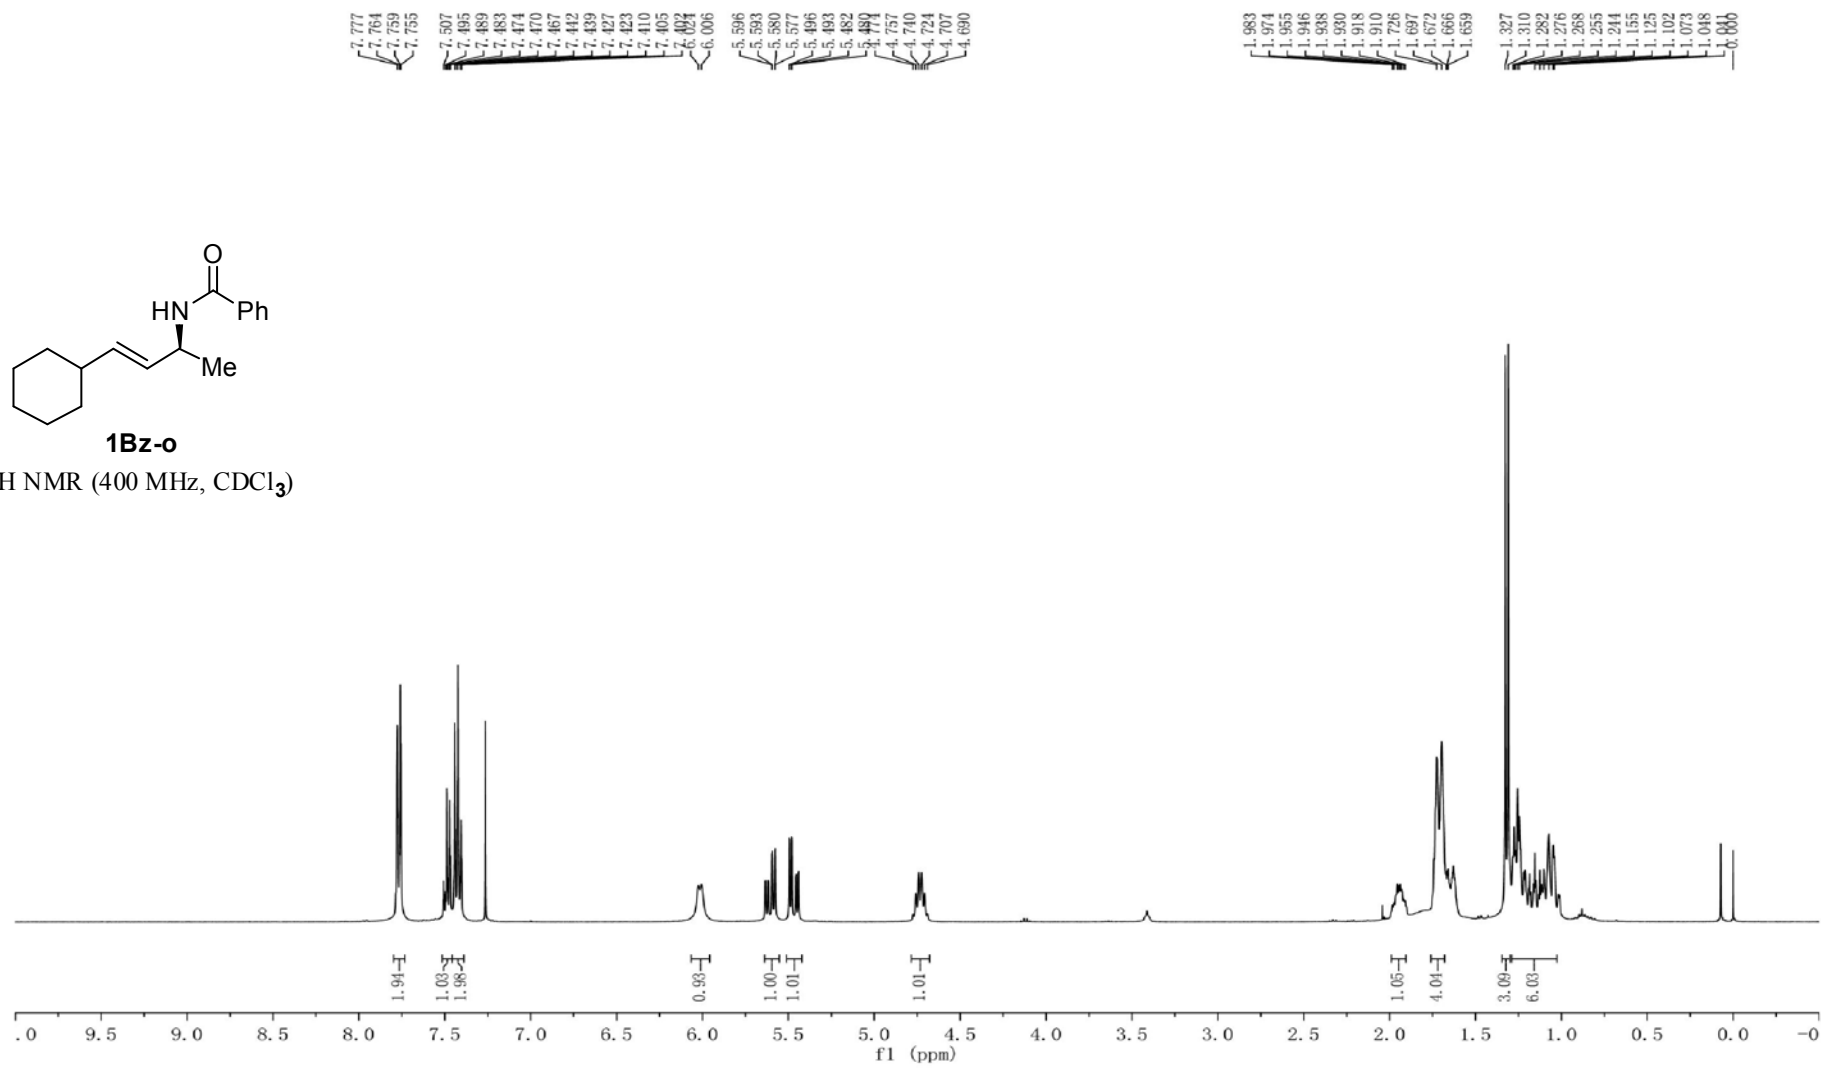

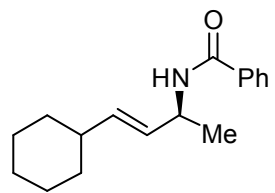

**1Bz-o**

$^{13}\text{C}$  NMR (100 MHz,  $\text{CDCl}_3$ )

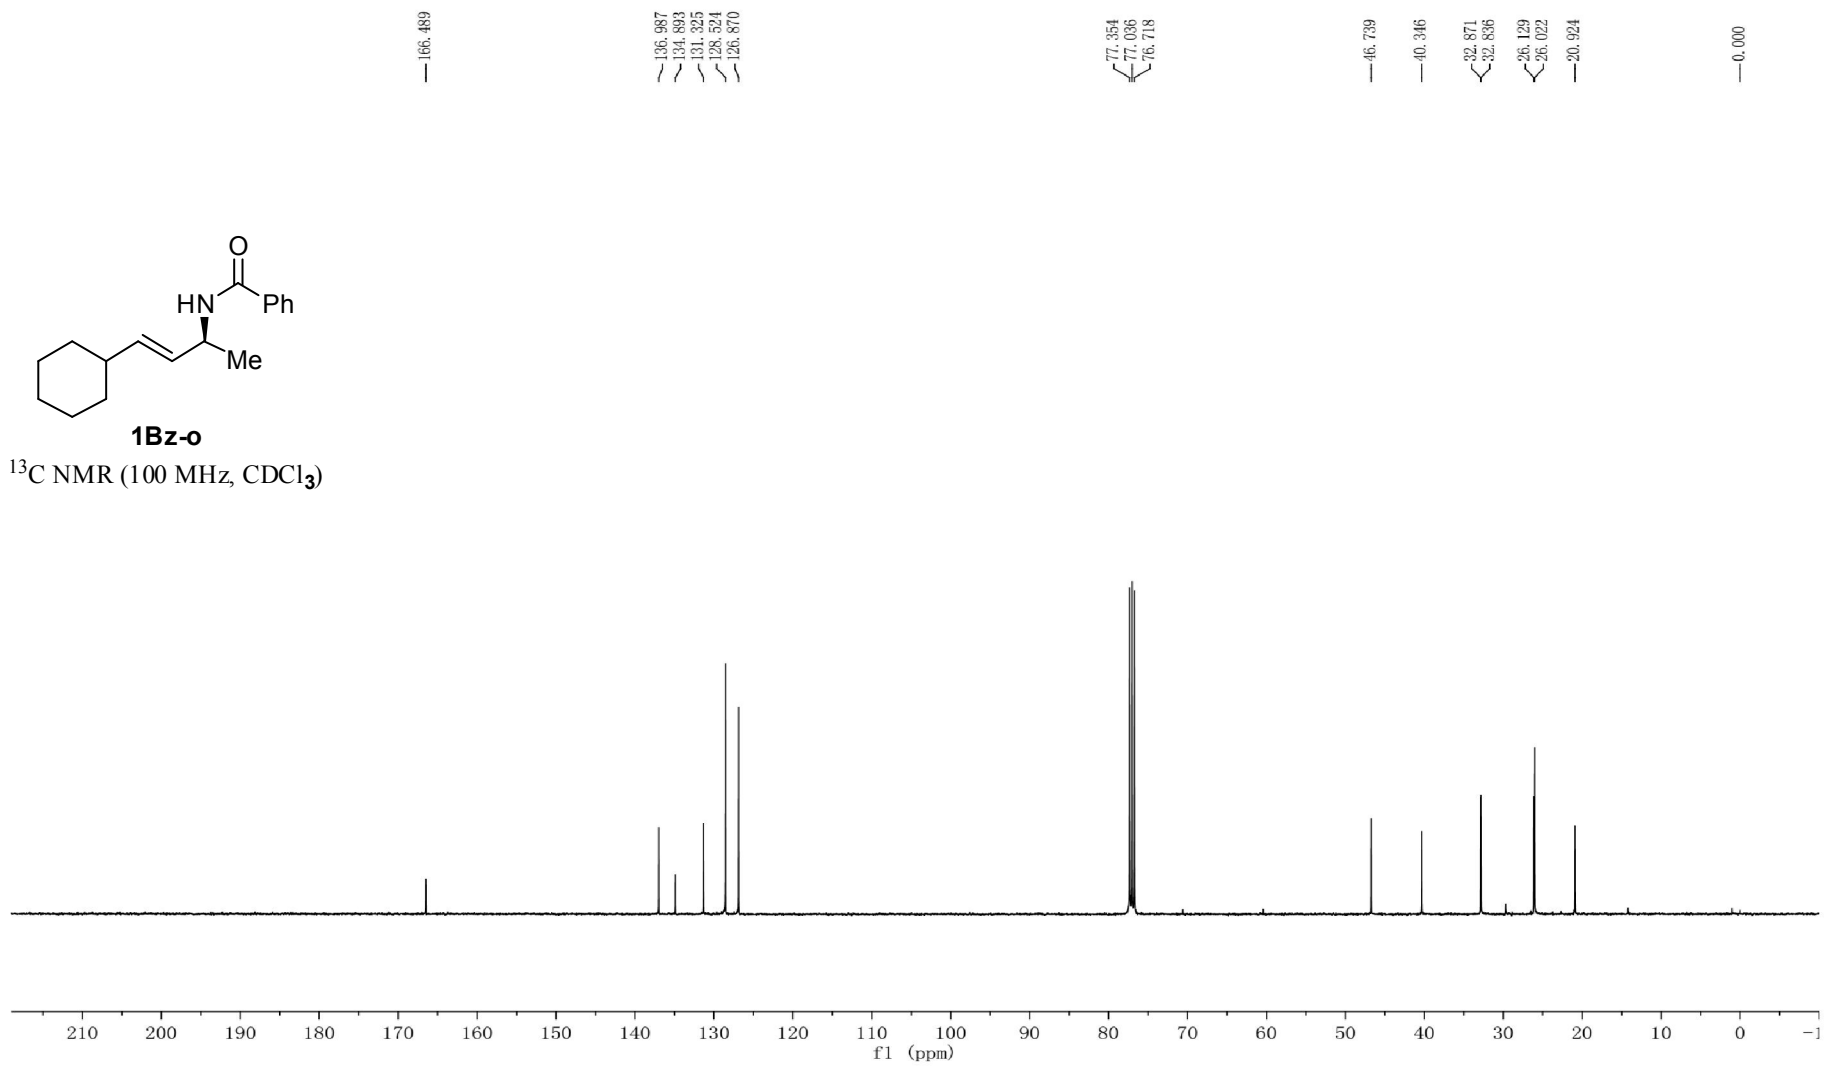

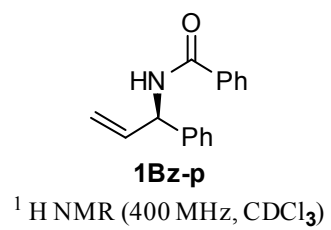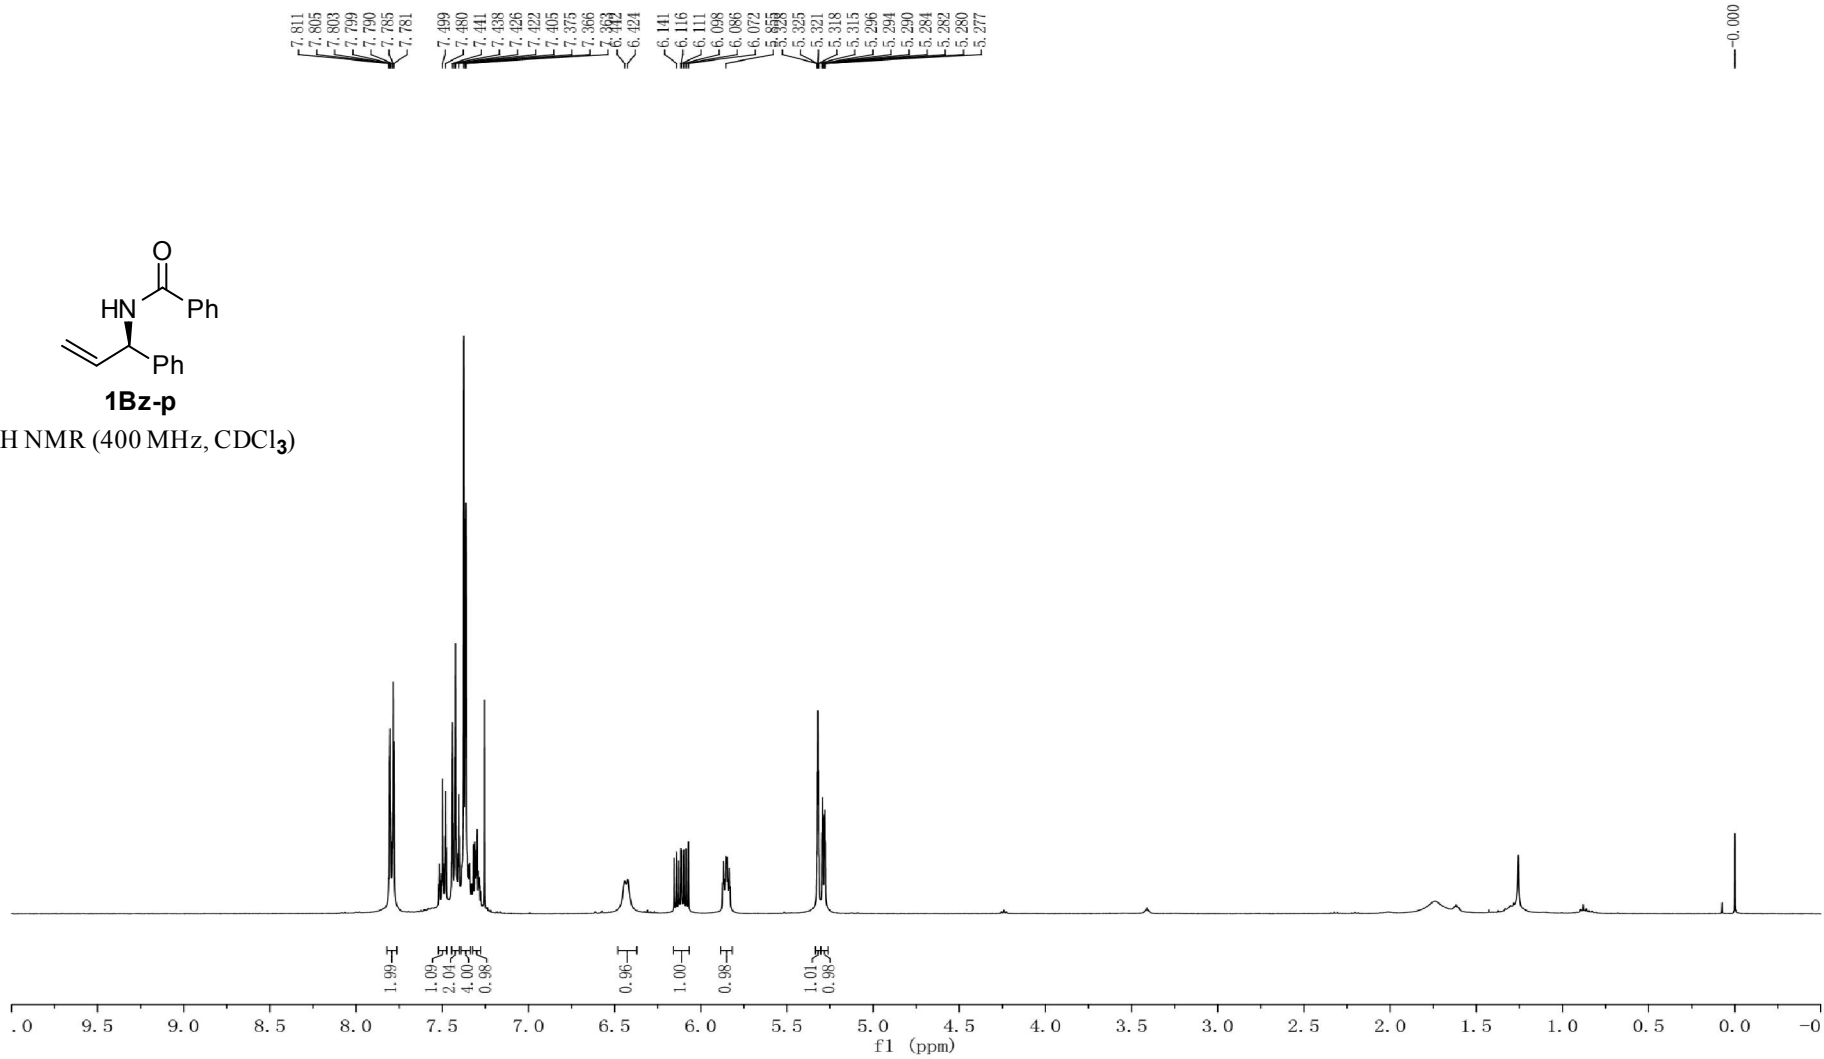

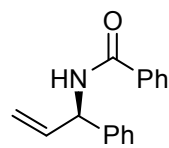

**1Bz-p**

$^{13}\text{C}$  NMR (400 MHz,  $\text{CDCl}_3$ )

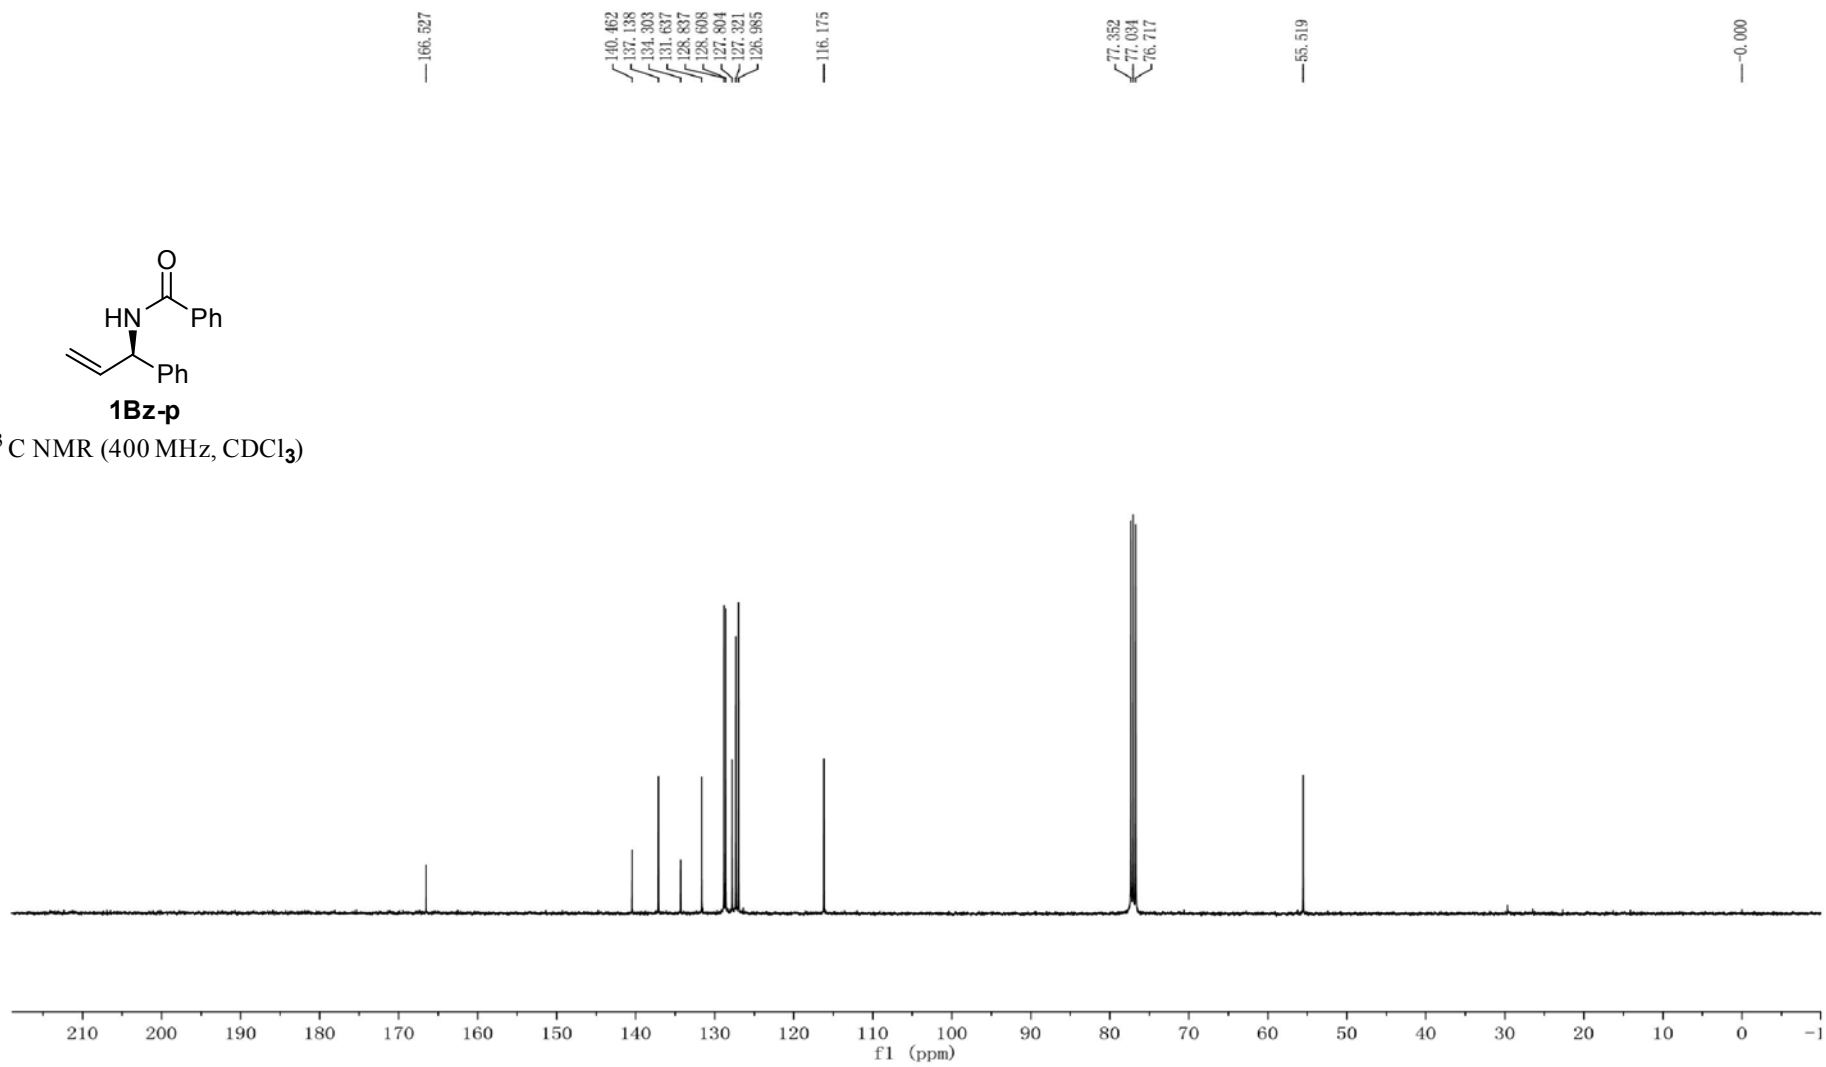

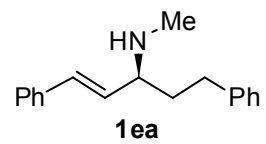

$^1\text{H}$  NMR (400 MHz,  $\text{CDCl}_3$ )

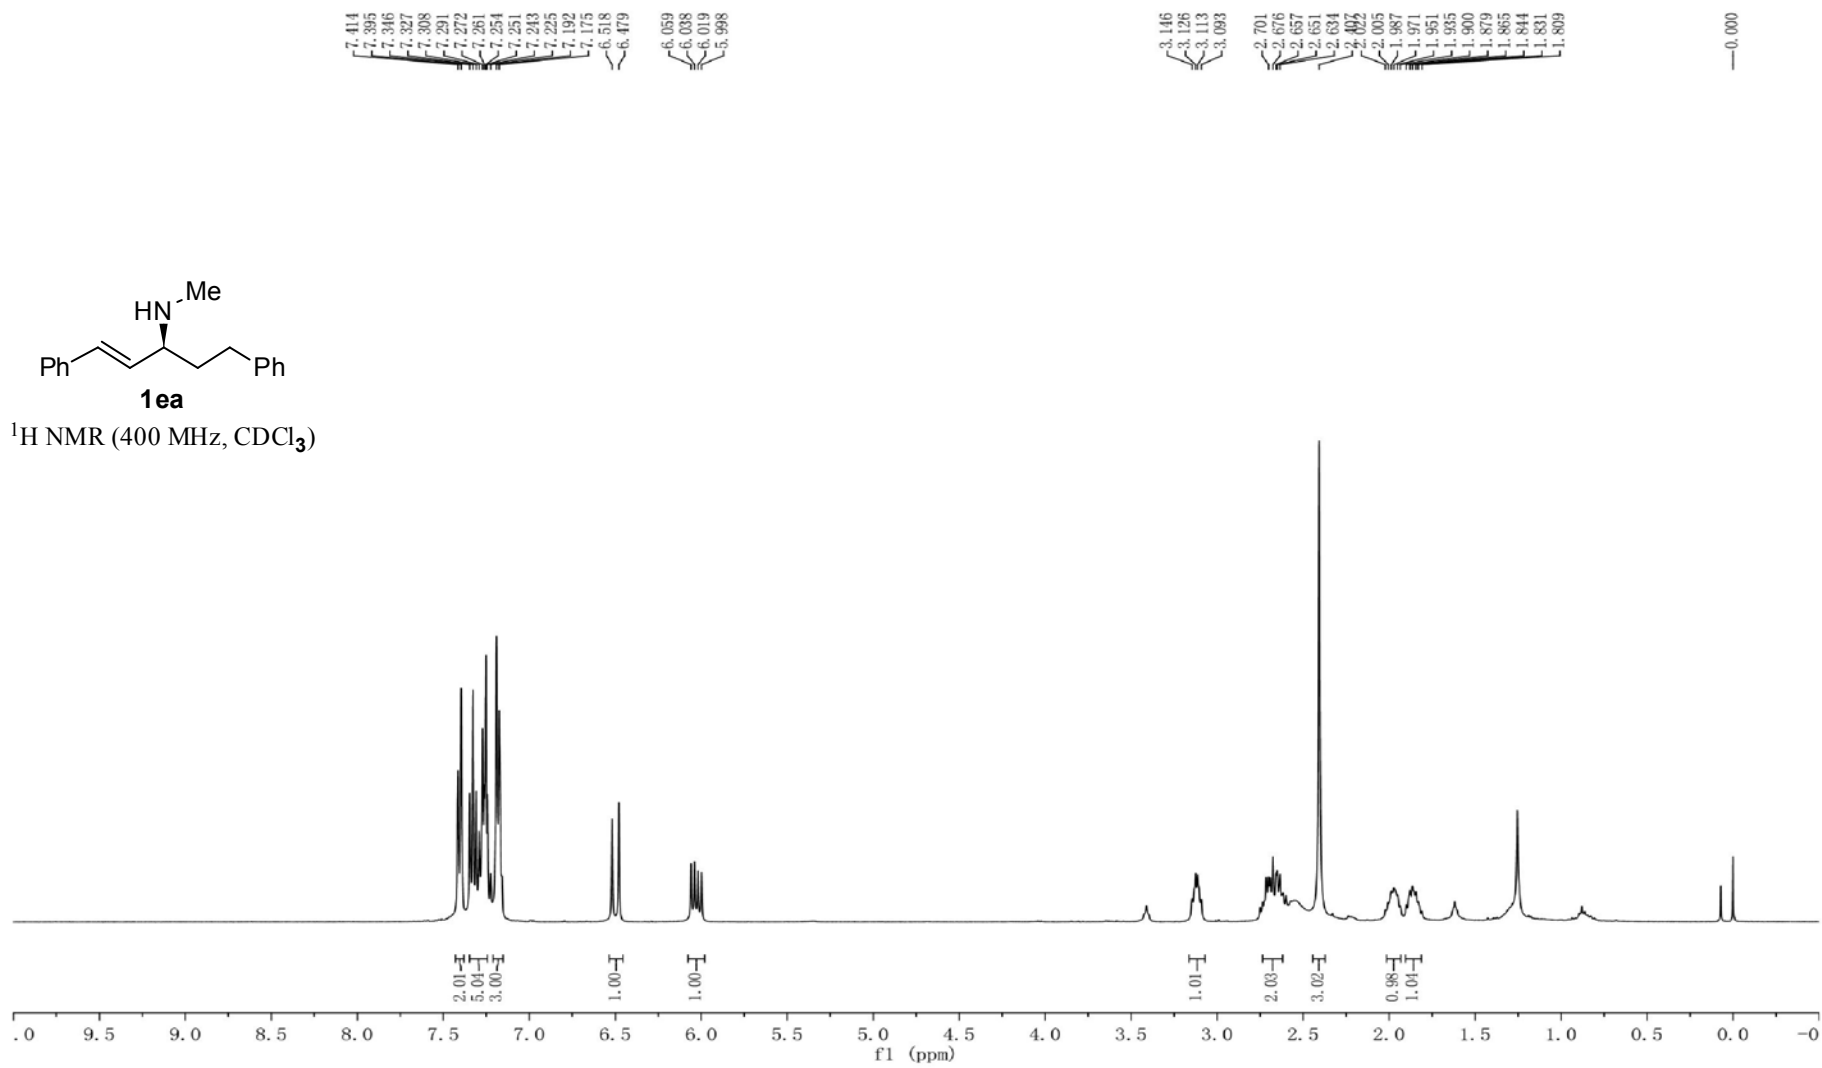

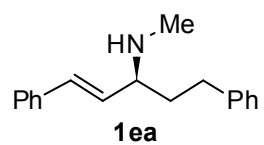

$^{13}\text{C}$  NMR (100 MHz,  $\text{CDCl}_3$ )

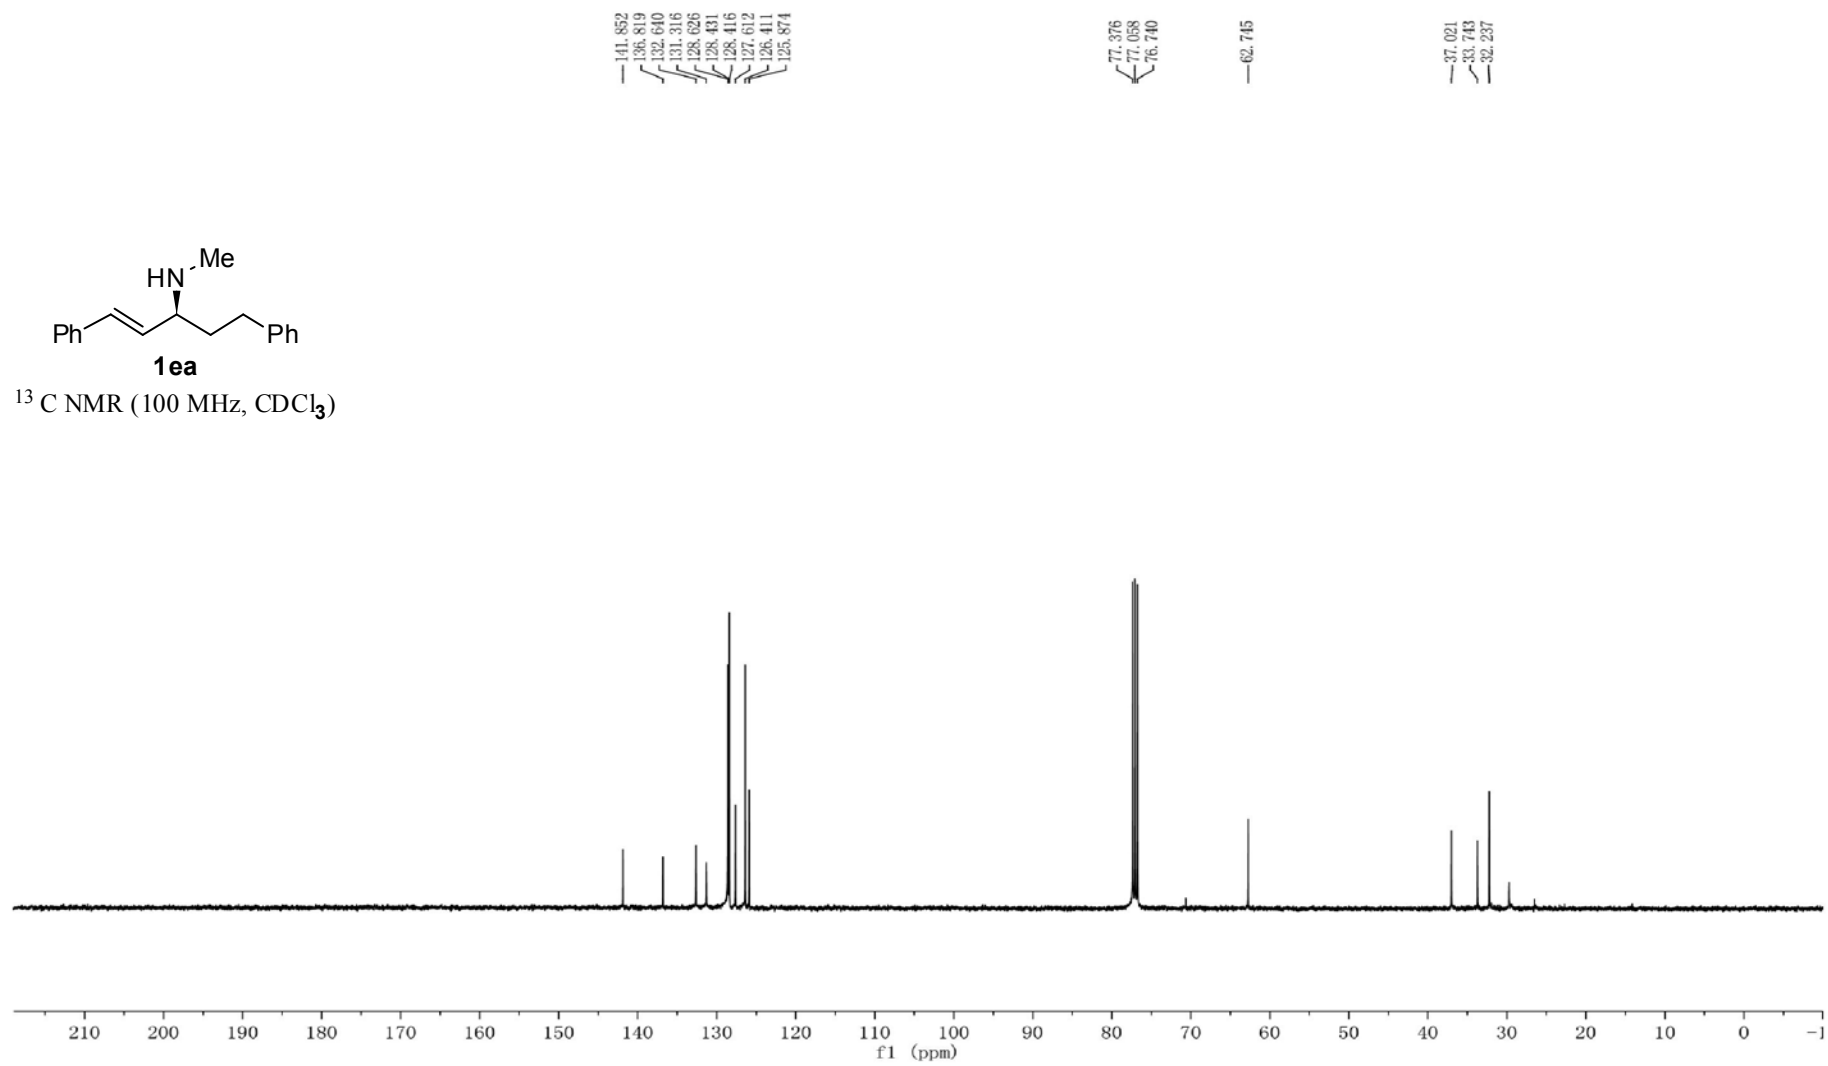

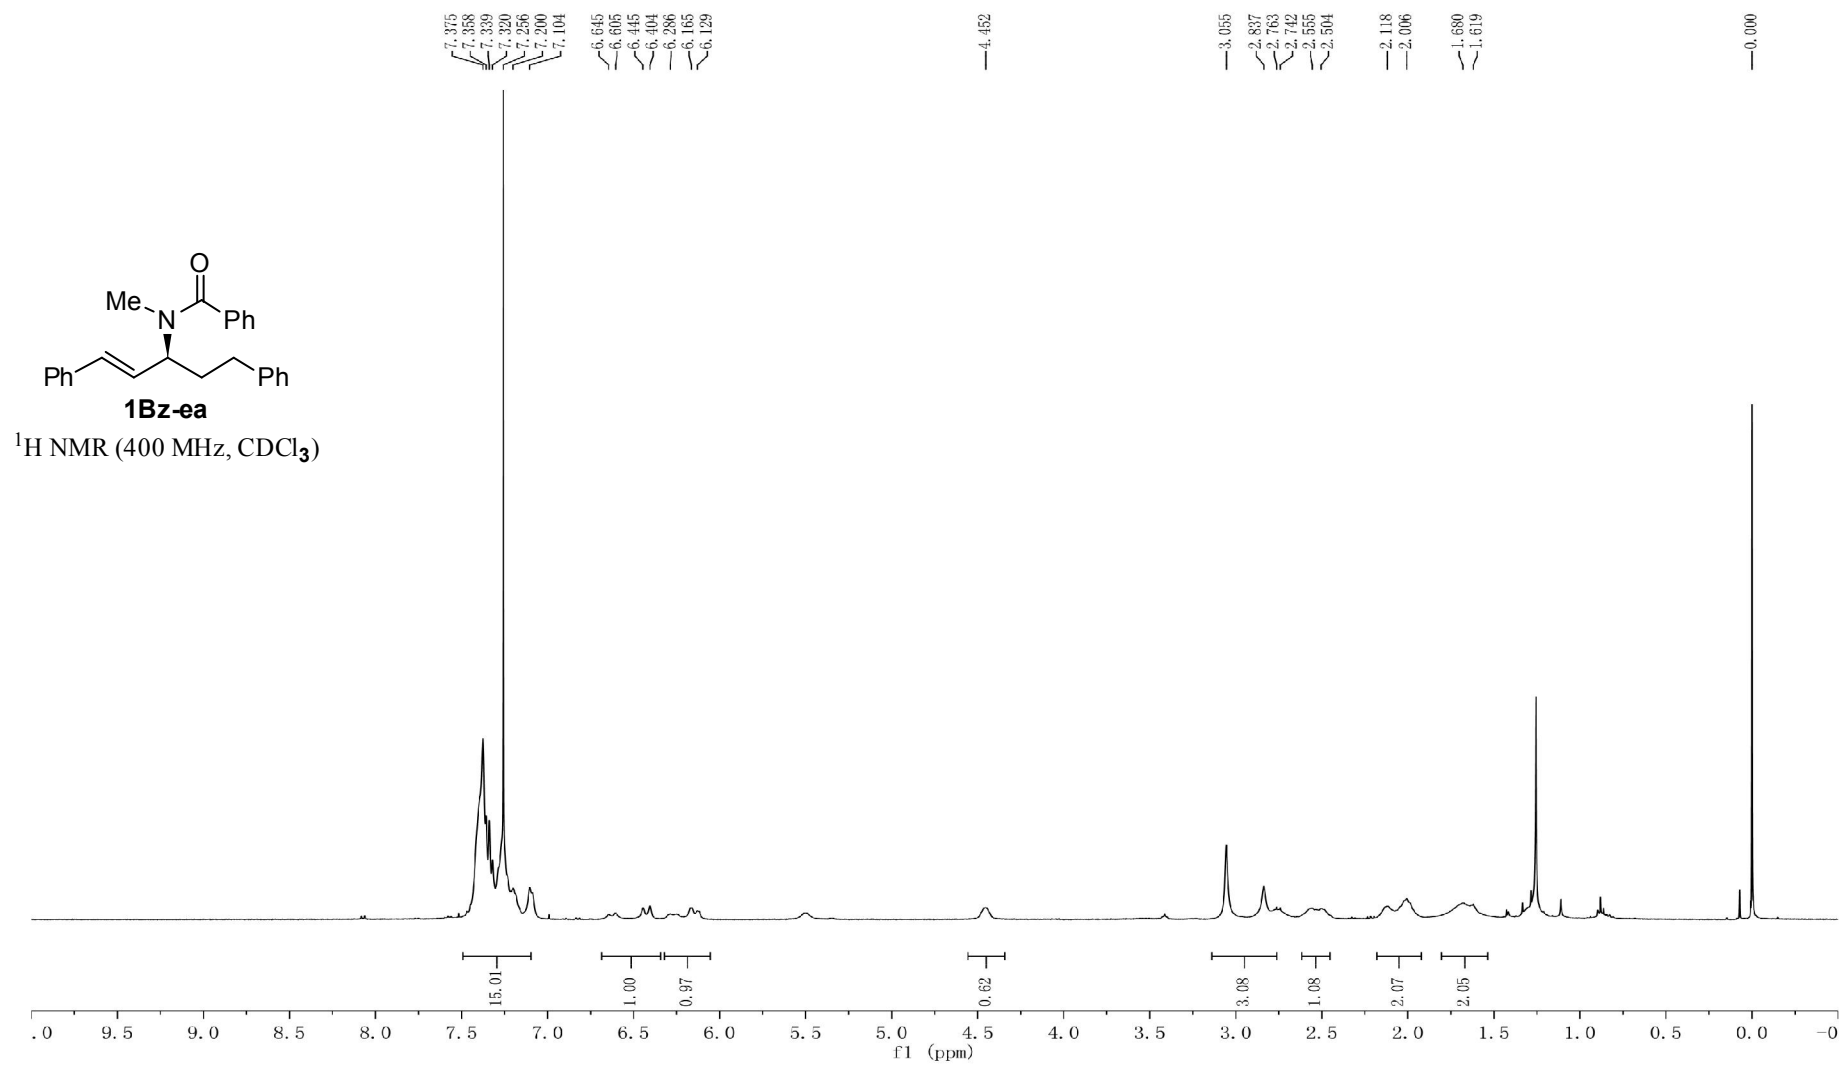

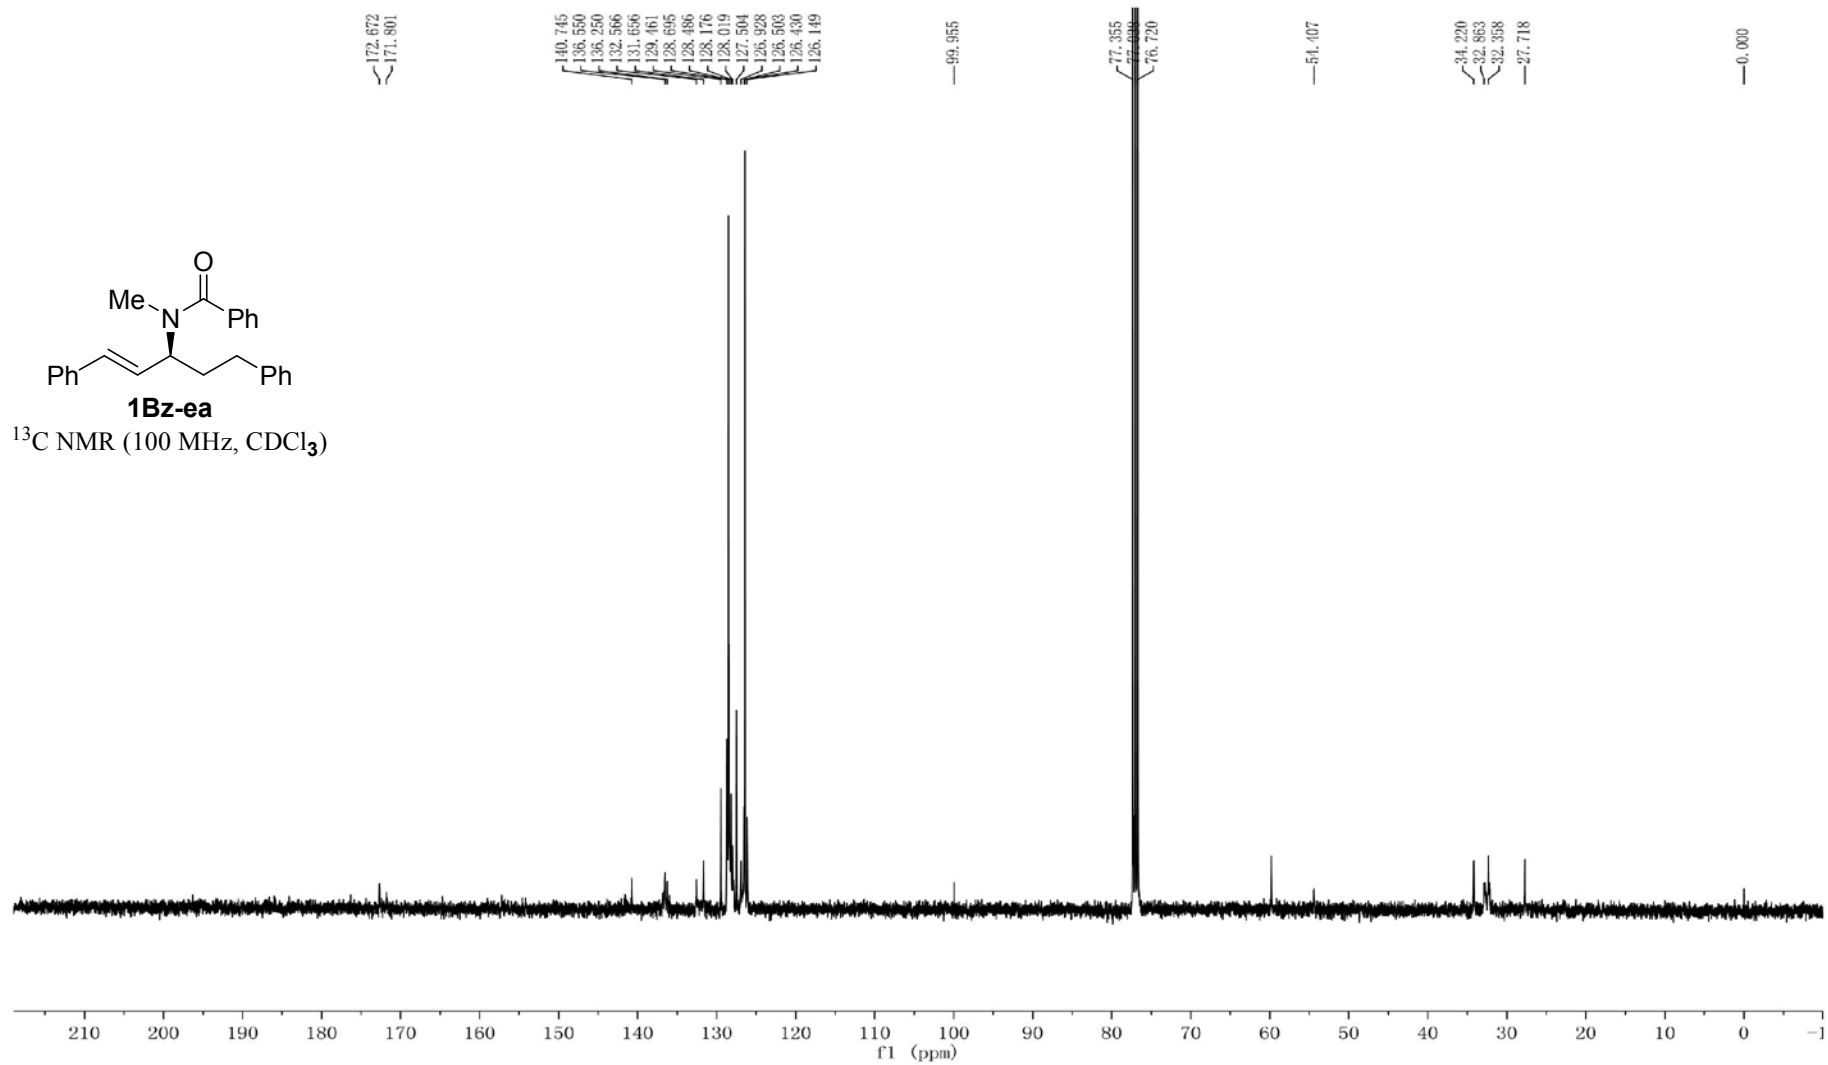



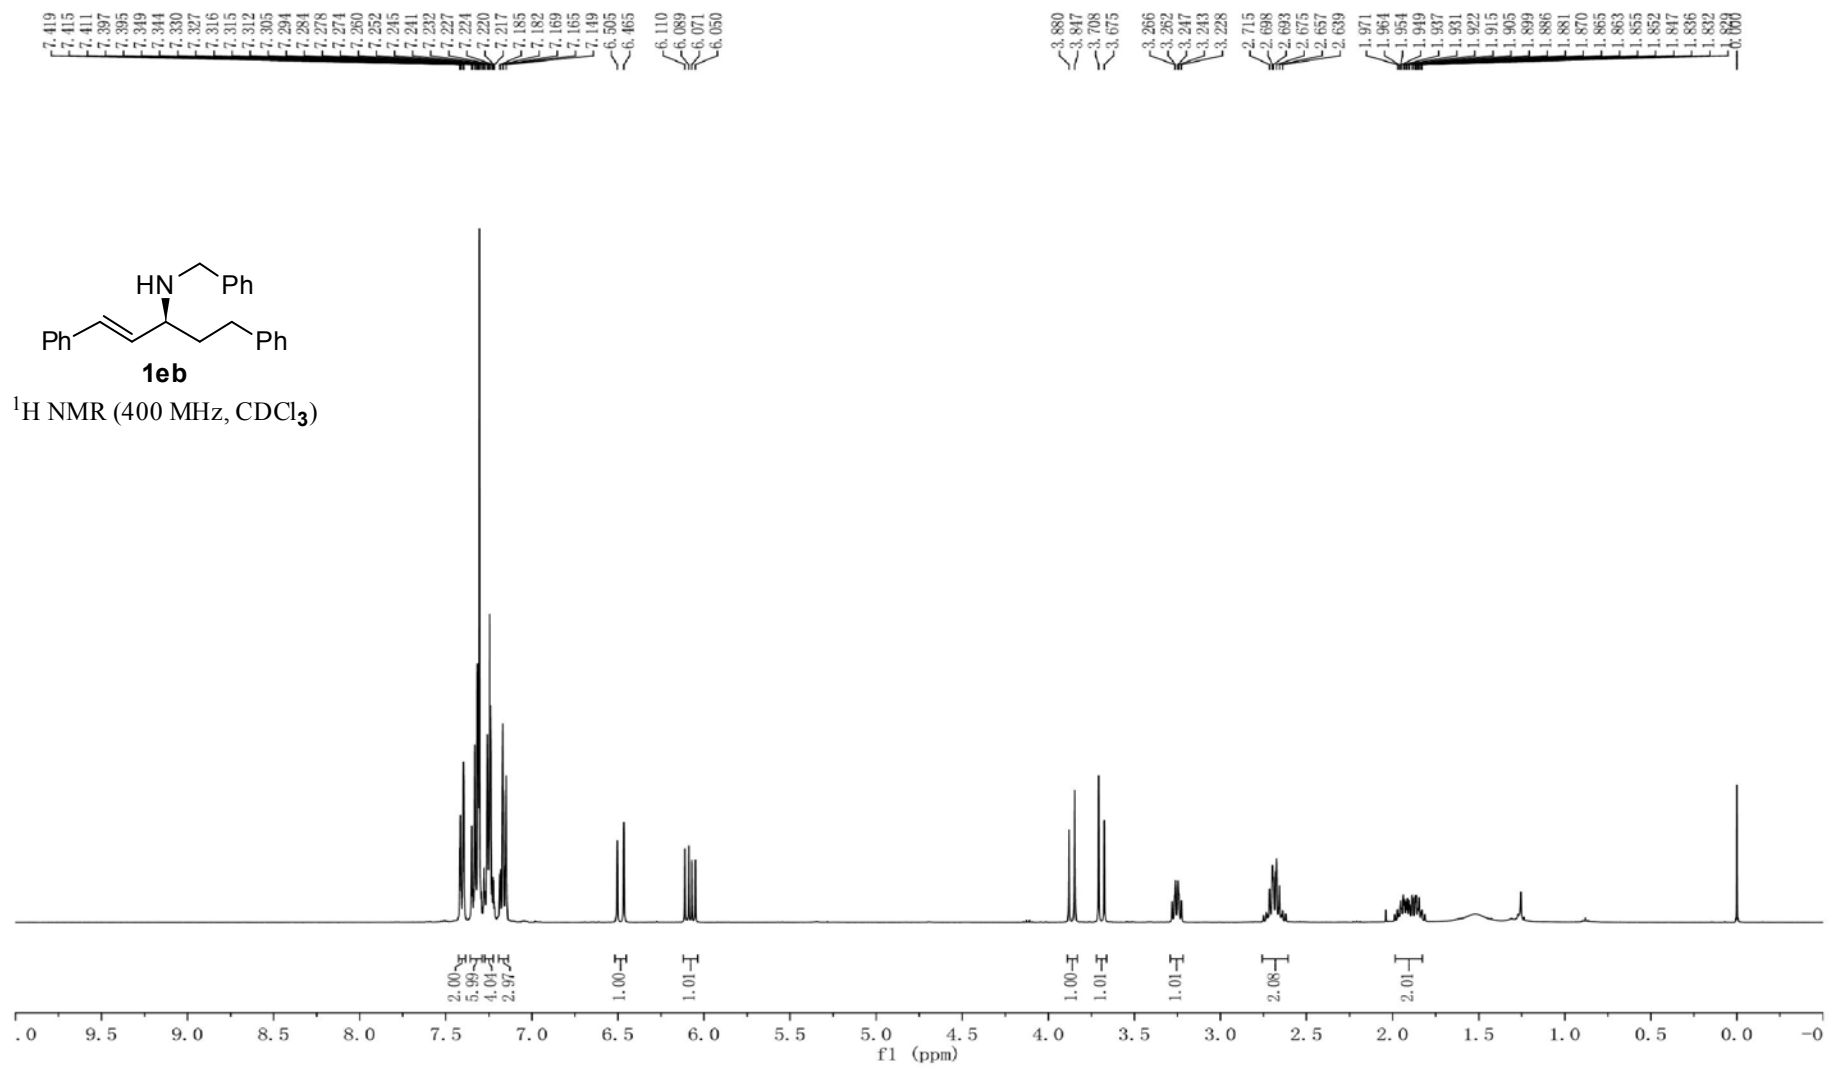

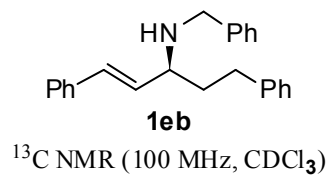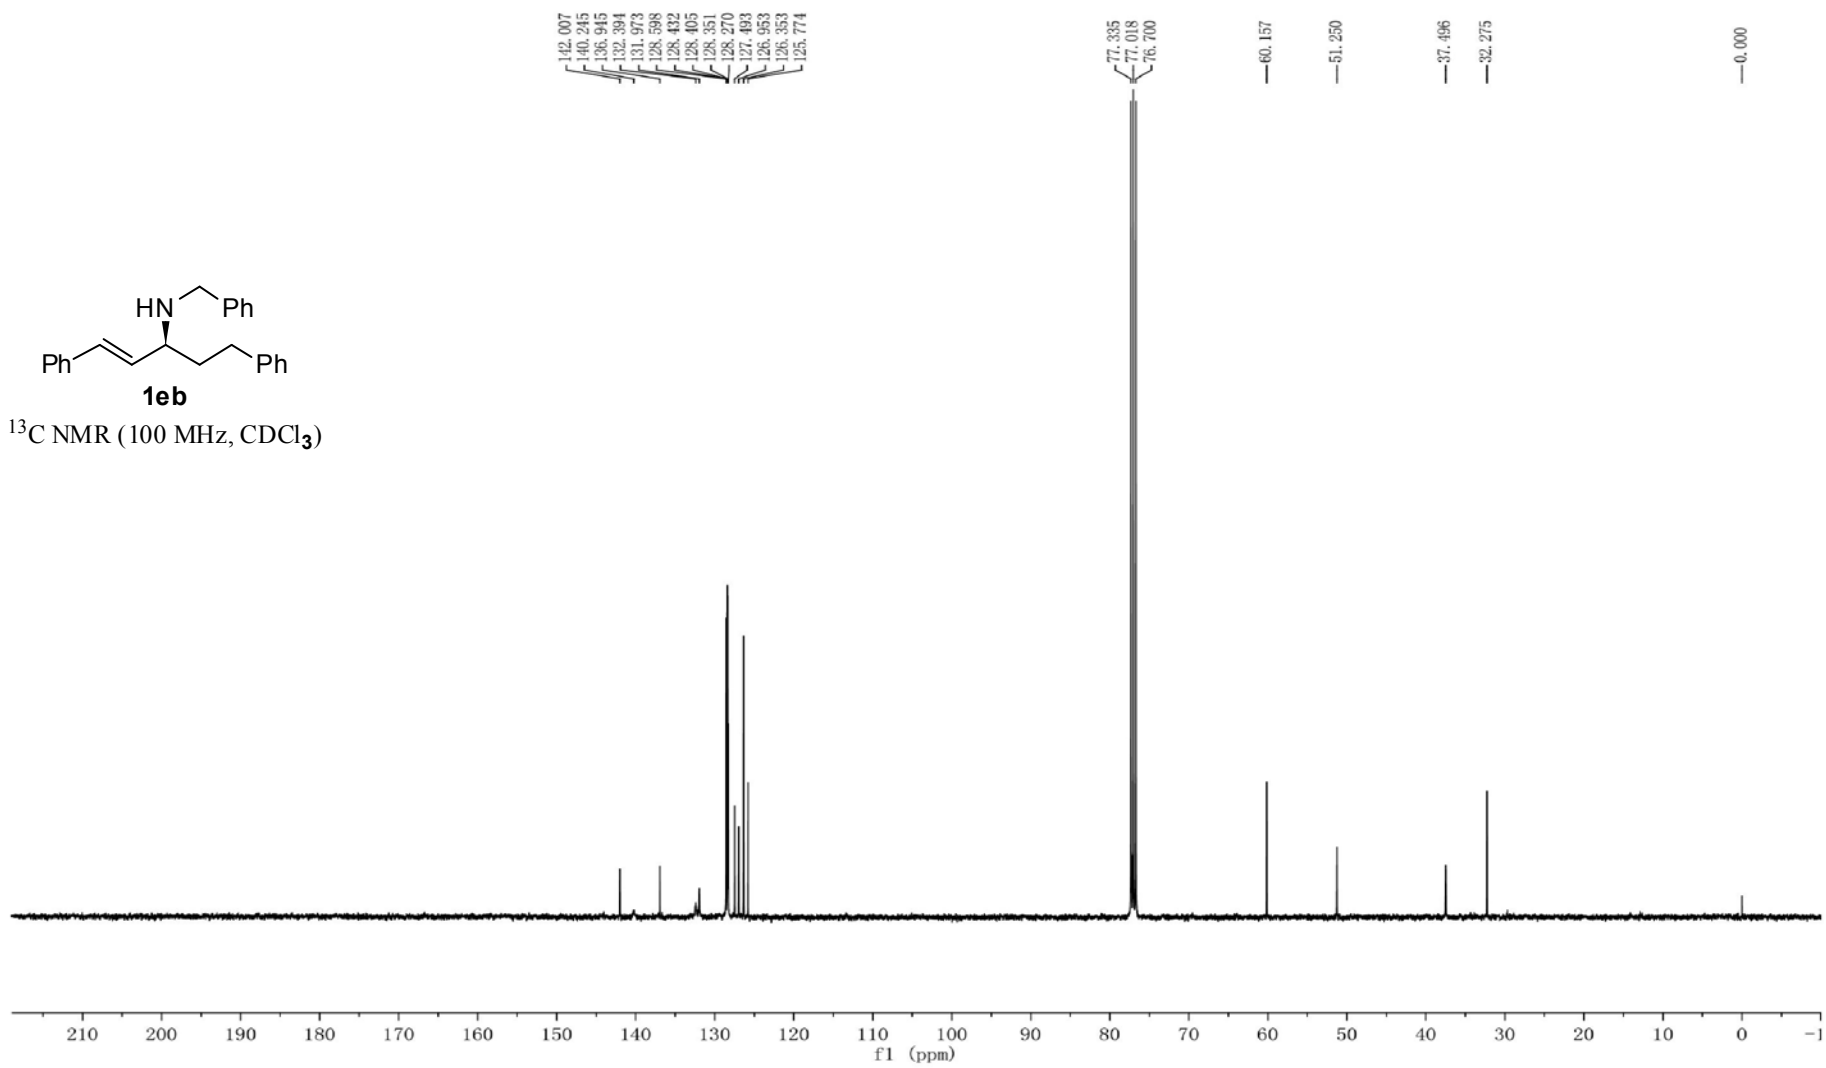

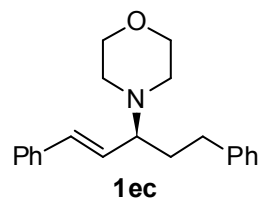

$^1\text{H NMR}$  (400 MHz,  $\text{CDCl}_3$ )

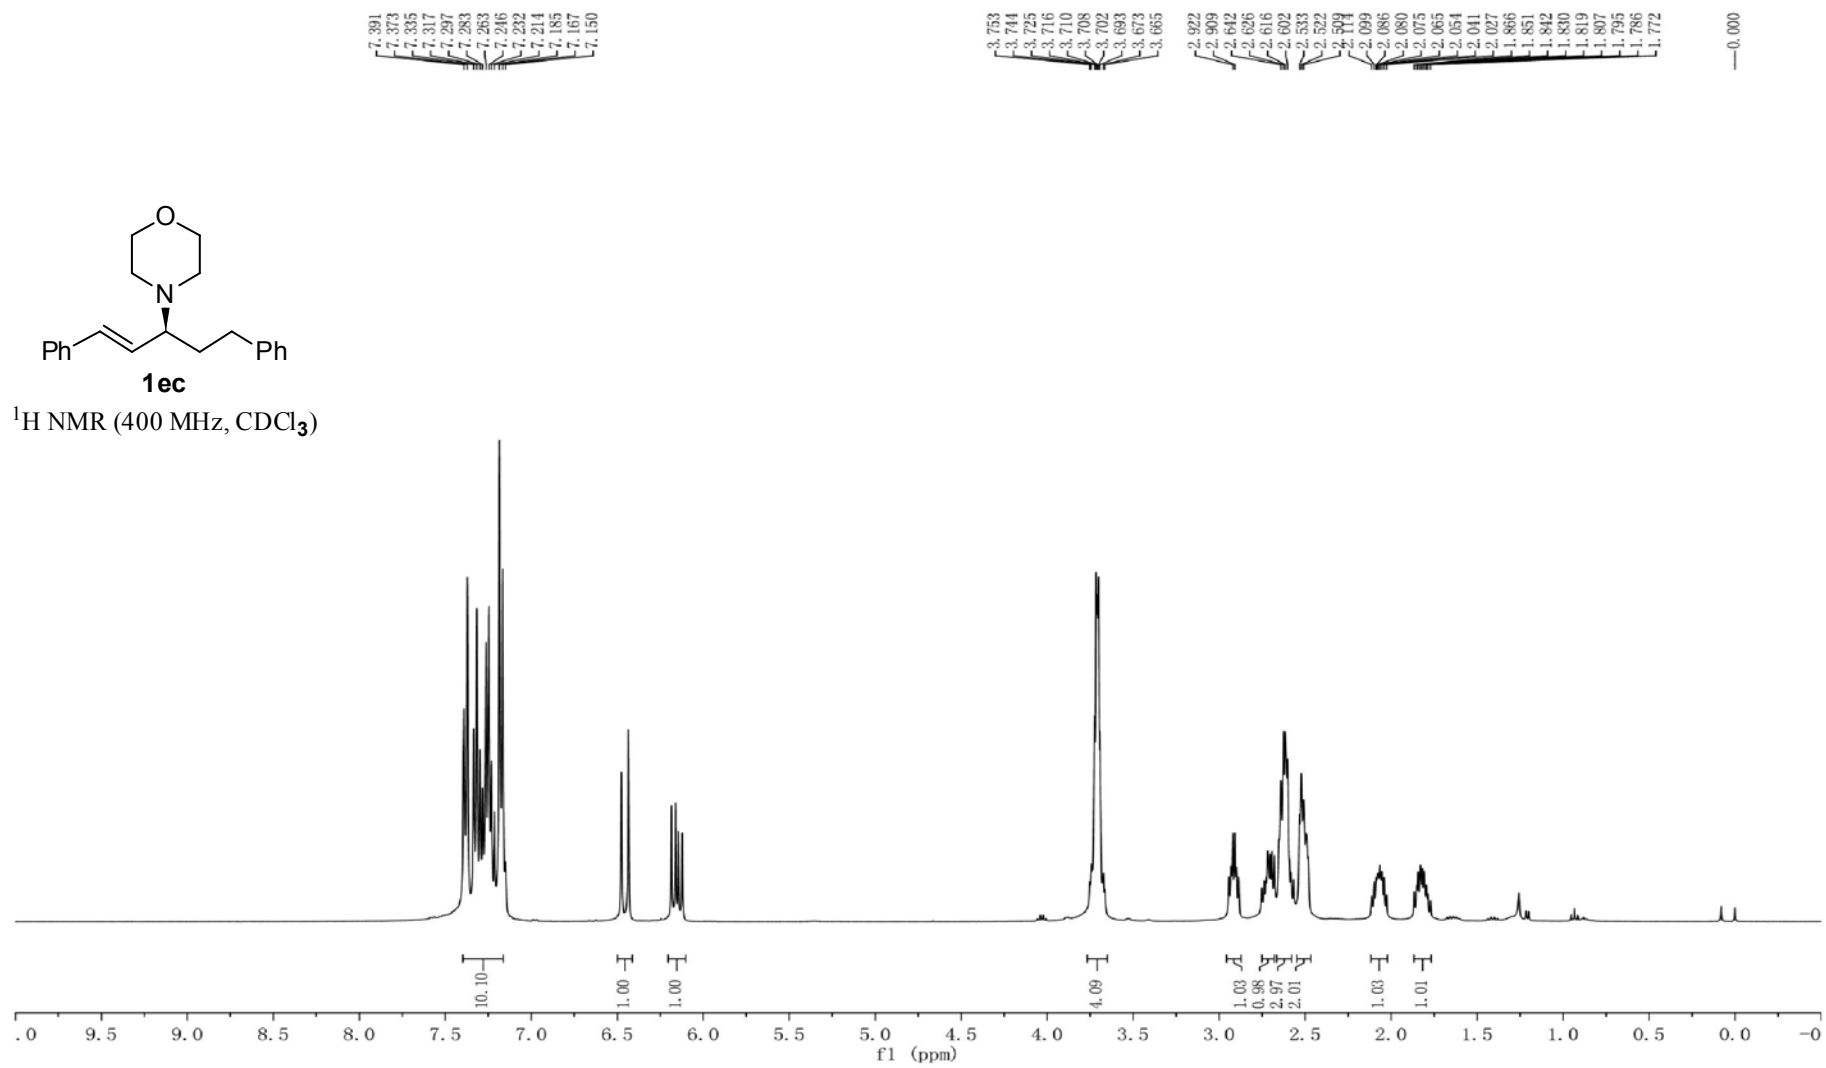

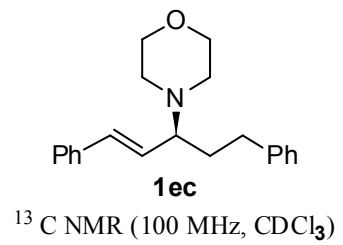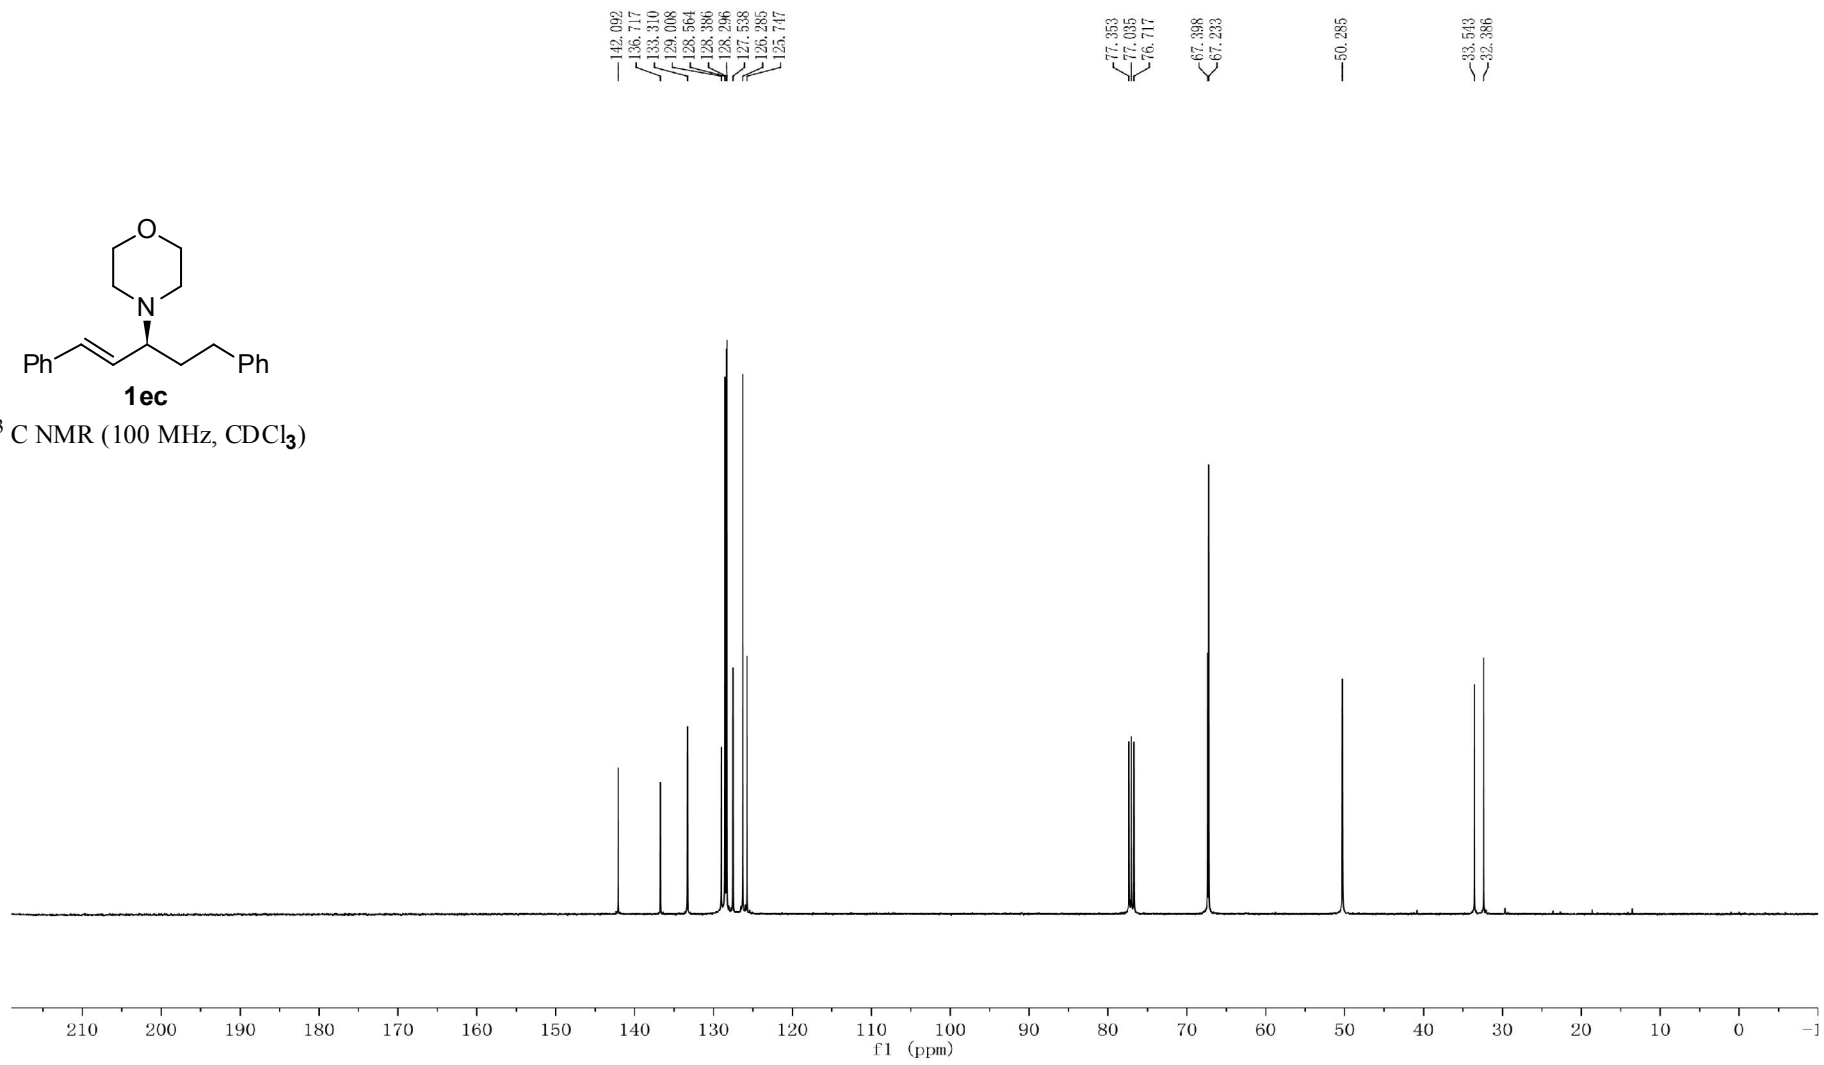

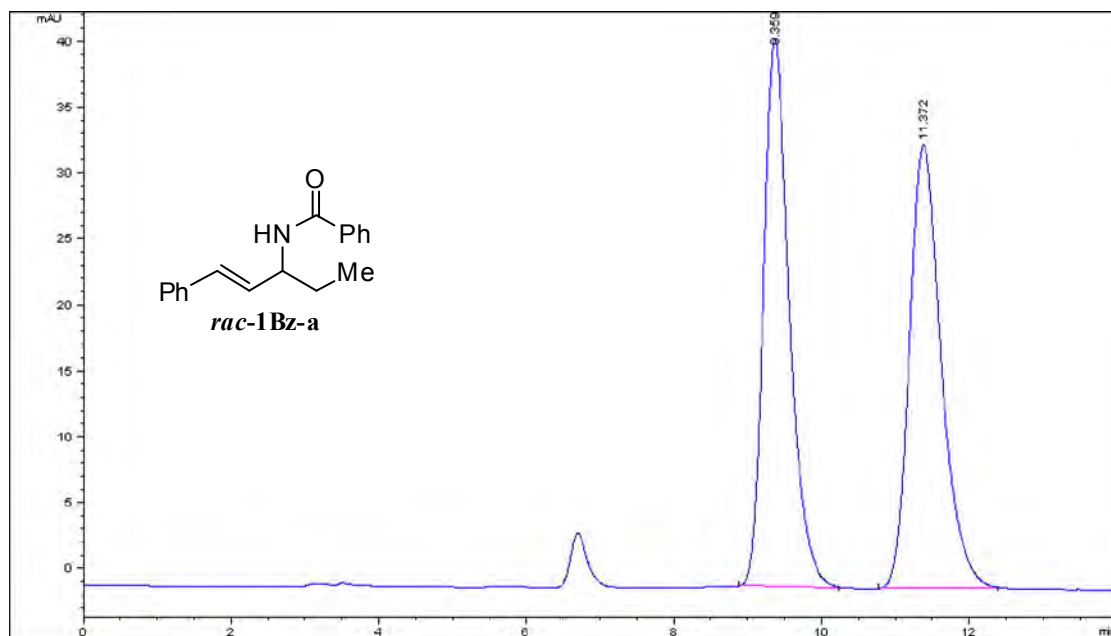

| Number | Time (min) | Area (mAU·s) | Height (mAU) | Width (min) | Symmetry factor | Area (%) |
|--------|------------|--------------|--------------|-------------|-----------------|----------|
| 1      | 9.359      | 1006.6       | 41.5         | 0.3657      | 0.725           | 50.022   |
| 2      | 11.372     | 1005.7       | 33.7         | 0.4505      | 0.74            | 49.978   |

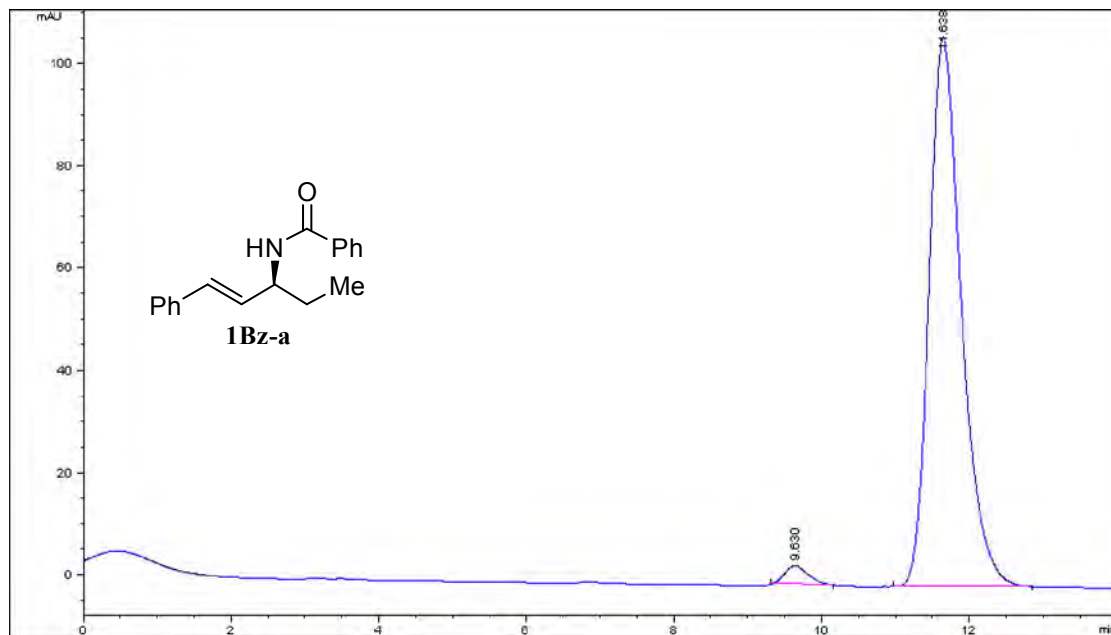

| Number | Time (min) | Area (mAU·s) | Height (mAU) | Width (min) | Symmetry factor | Area (%) |
|--------|------------|--------------|--------------|-------------|-----------------|----------|
| 1      | 9.63       | 81.9         | 3.7          | 0.3719      | 0.783           | 2.459    |
| 2      | 11.638     | 3250.1       | 107.4        | 0.5043      | 0.737           | 97.541   |

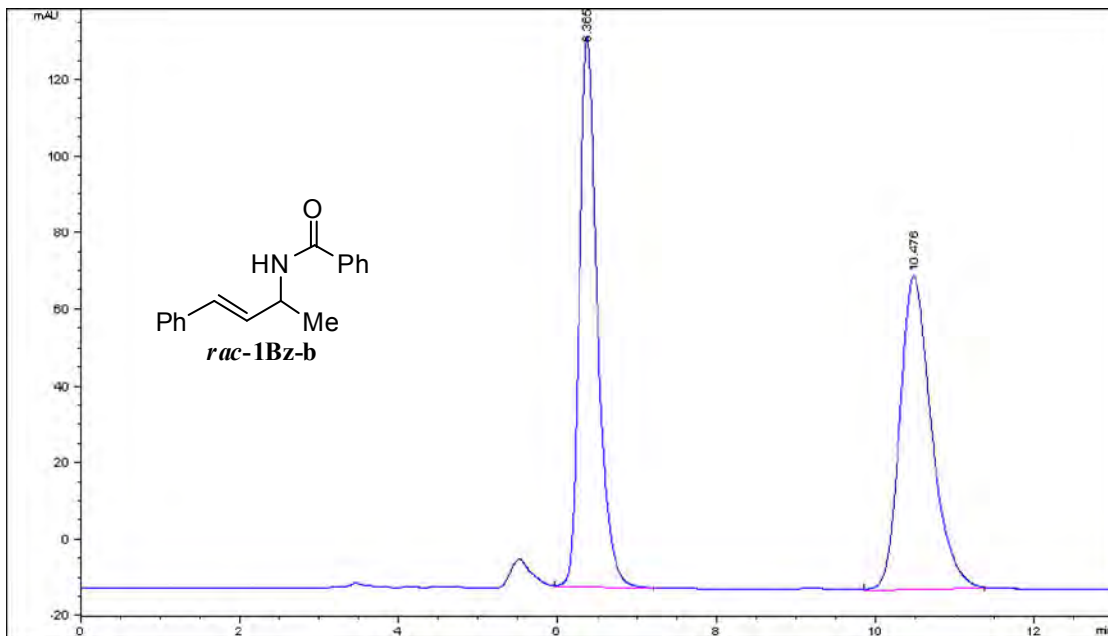

| Number | Time (min) | Area (mAU·s) | Height (mAU) | Width (min) | Symmetry factor | Area (%) |
|--------|------------|--------------|--------------|-------------|-----------------|----------|
| 1      | 6.365      | 2281.7       | 144          | 0.2387      | 0.688           | 50.261   |
| 2      | 10.476     | 2258         | 81.8         | 0.46        | 0.761           | 49.739   |

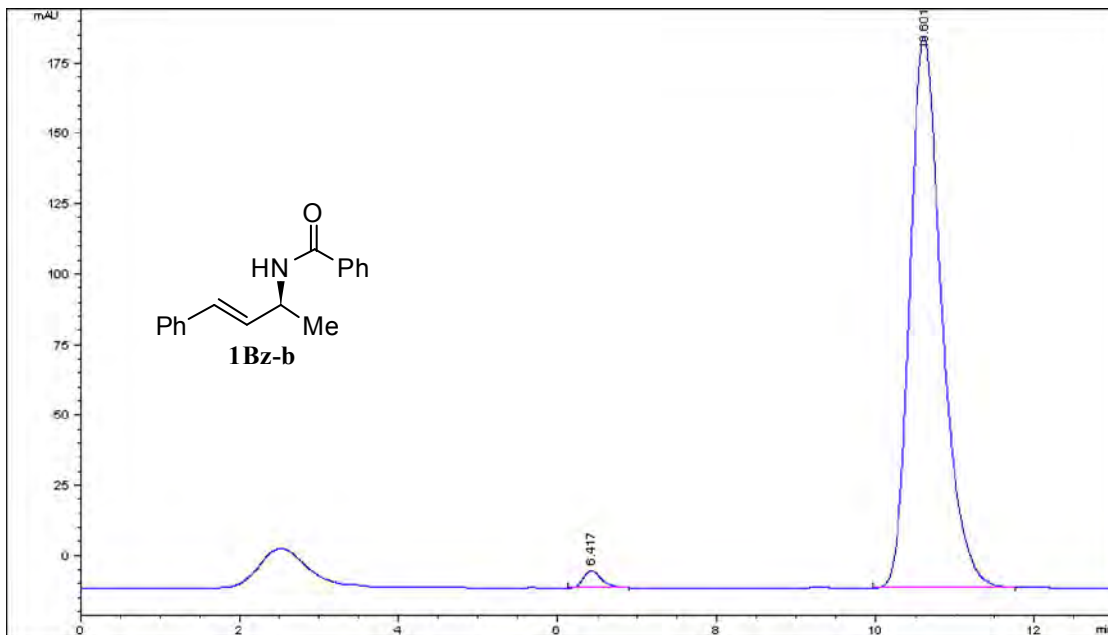

| Number | Time (min) | Area (mAU·s) | Height (mAU) | Width (min) | Symmetry factor | Area (%) |
|--------|------------|--------------|--------------|-------------|-----------------|----------|
| 1      | 6.417      | 94.8         | 6            | 0.2372      | 0.701           | 1.705    |
| 2      | 10.601     | 5468.6       | 195.9        | 0.4261      | 0.731           | 98.295   |

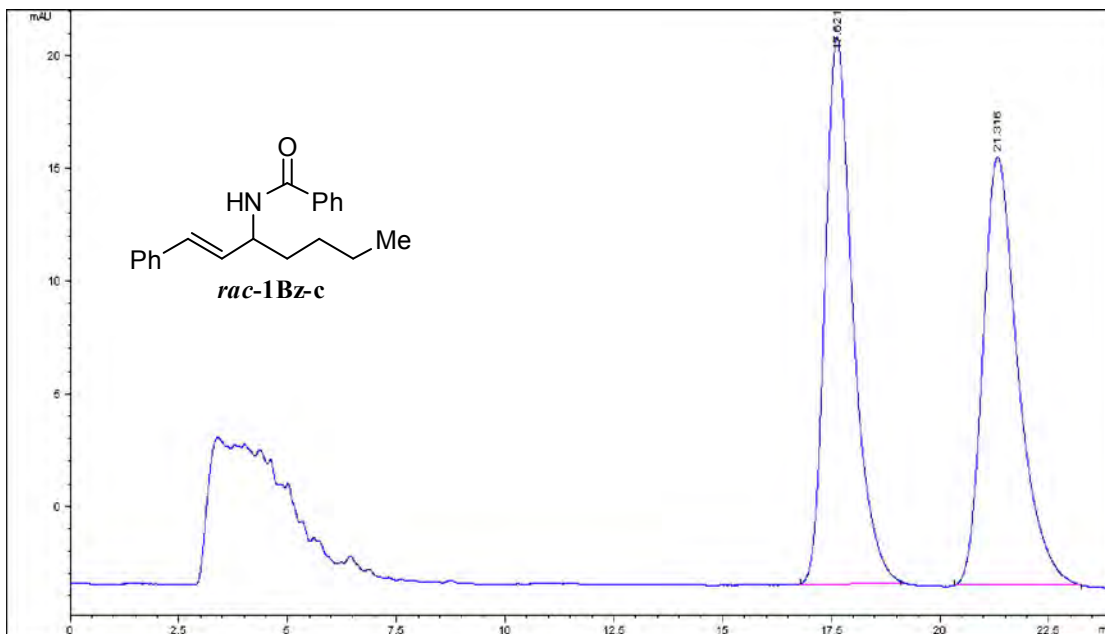

| Number | Time (min) | Area (mAU·s) | Height (mAU) | Width (min) | Symmetry factor | Area (%) |
|--------|------------|--------------|--------------|-------------|-----------------|----------|
| 1      | 17.621     | 1083.2       | 24.3         | 0.6703      | 0.697           | 50.388   |
| 2      | 21.316     | 1066.5       | 19           | 0.936       | 0.691           | 49.612   |

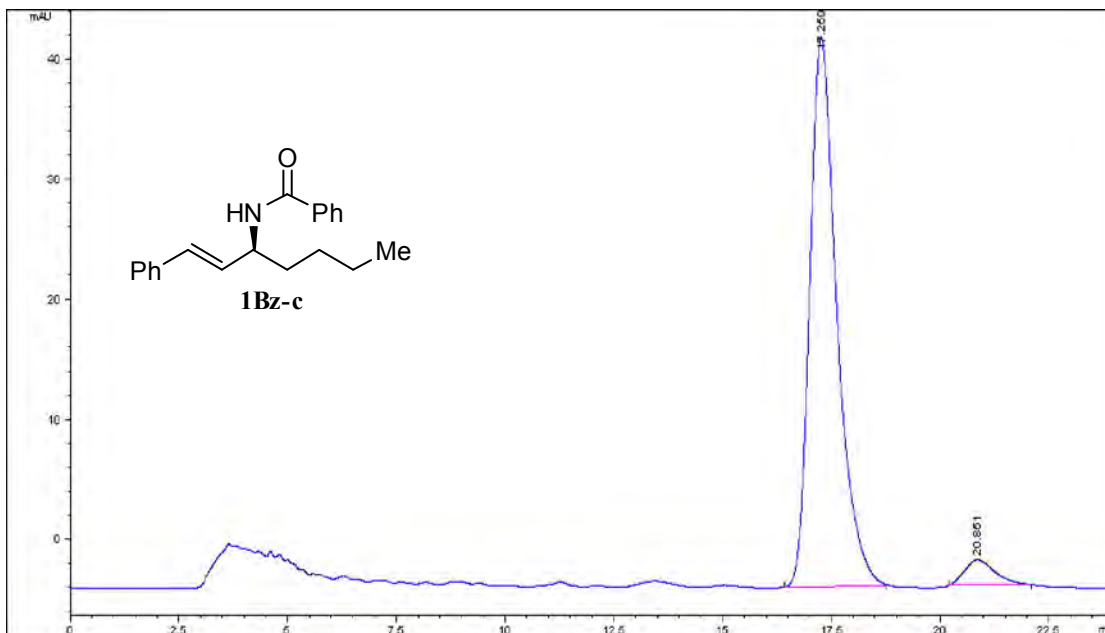

| Number | Time (min) | Area (mAU·s) | Height (mAU) | Width (min) | Symmetry factor | Area (%) |
|--------|------------|--------------|--------------|-------------|-----------------|----------|
| 1      | 17.259     | 1982         | 45.8         | 0.6493      | 0.68            | 94.964   |
| 2      | 20.851     | 105.1        | 2.1          | 0.8188      | 0.779           | 5.036    |

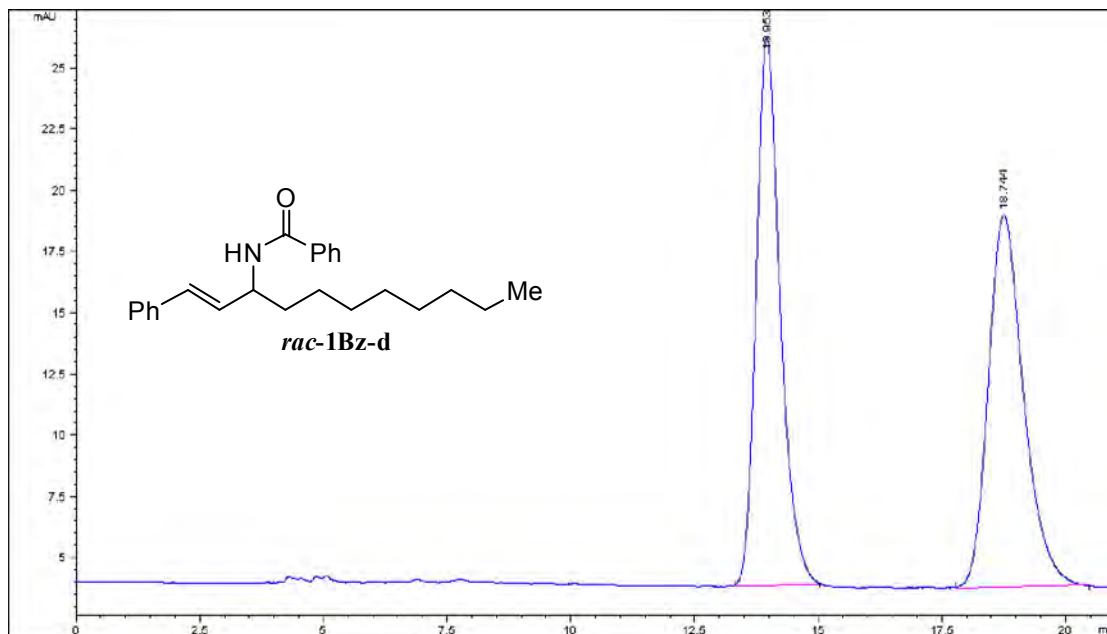

| Number | Time (min) | Area (mAU·s) | Height (mAU) | Width (min) | Symmetry factor | Area (%) |
|--------|------------|--------------|--------------|-------------|-----------------|----------|
| 1      | 13.953     | 760.1        | 22.4         | 0.5105      | 0.742           | 50.156   |
| 2      | 18.744     | 755.4        | 15.2         | 0.8275      | 0.765           | 49.844   |

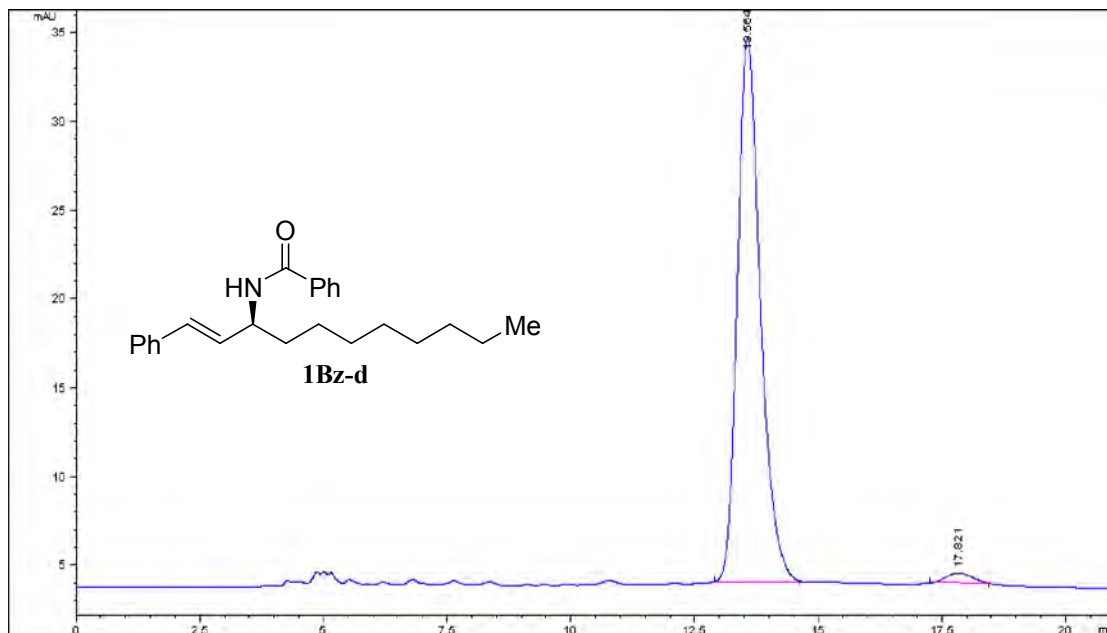

| Number | Time (min) | Area (mAU·s) | Height (mAU) | Width (min) | Symmetry factor | Area (%) |
|--------|------------|--------------|--------------|-------------|-----------------|----------|
| 1      | 13.564     | 992.1        | 30.7         | 0.4888      | 0.741           | 97.902   |
| 2      | 17.821     | 21.3         | 5.8E-1       | 0.606       | 0.854           | 2.098    |



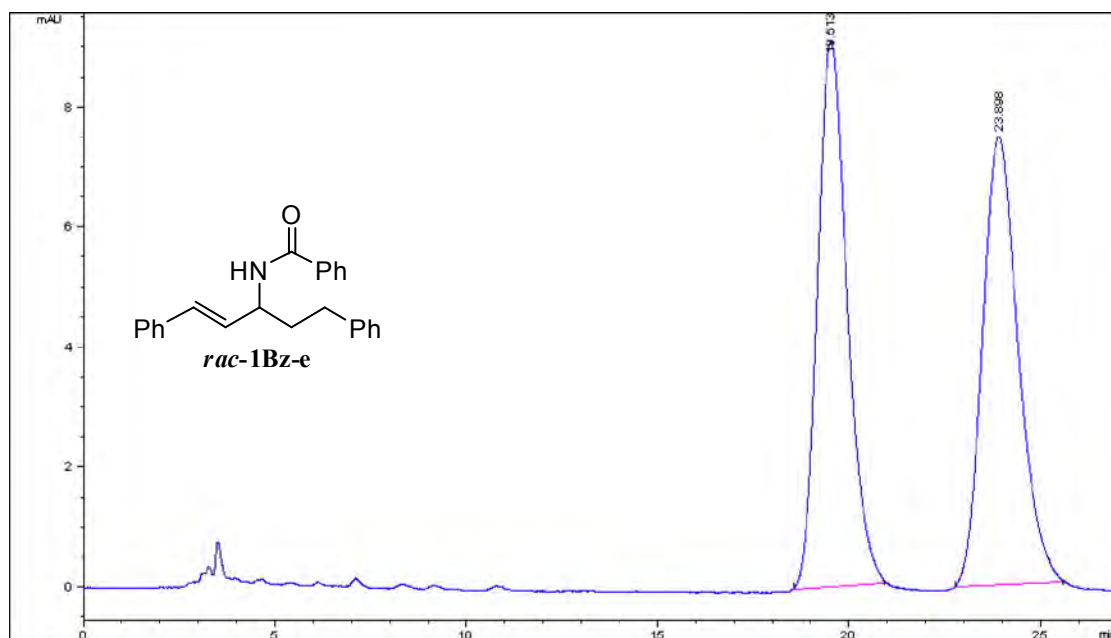

| Number | Time (min) | Area (mAU·s) | Height (mAU) | Width (min) | Symmetry factor | Area (%) |
|--------|------------|--------------|--------------|-------------|-----------------|----------|
| 1      | 19.513     | 490.4        | 9.1          | 0.7966      | 0.778           | 50.170   |
| 2      | 23.898     | 487.1        | 7.5          | 0.9456      | 0.785           | 49.830   |

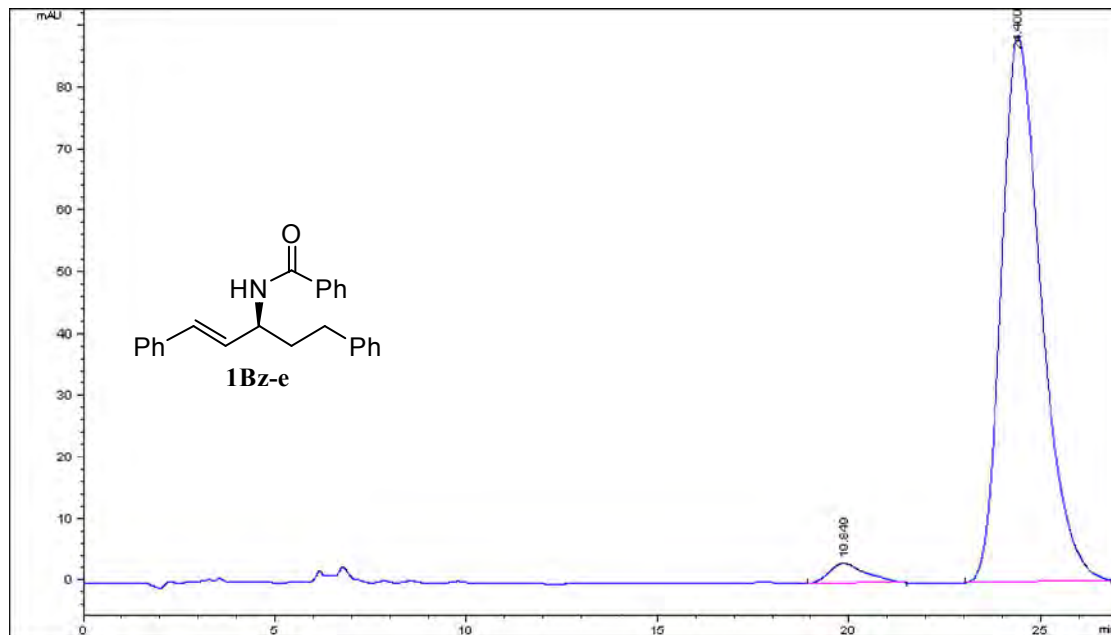

| Number | Time (min) | Area (mAU·s) | Height (mAU) | Width (min) | Symmetry factor | Area (%) |
|--------|------------|--------------|--------------|-------------|-----------------|----------|
| 1      | 19.849     | 215.8        | 3.2          | 0.8761      | 0.603           | 3.243    |
| 2      | 24.4       | 6436.8       | 88.6         | 1.1027      | 0.678           | 96.757   |

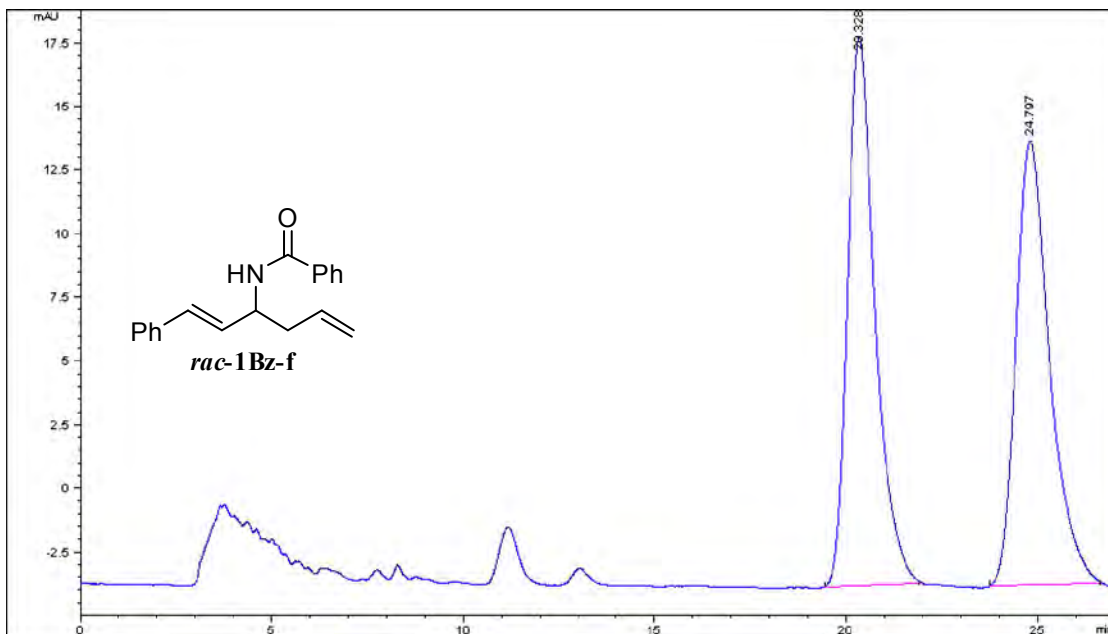

| Number | Time (min) | Area (mAU·s) | Height (mAU) | Width (min) | Symmetry factor | Area (%) |
|--------|------------|--------------|--------------|-------------|-----------------|----------|
| 1      | 20.328     | 1074.6       | 21.6         | 0.7446      | 0.675           | 50.189   |
| 2      | 24.797     | 1066.5       | 17.5         | 0.9094      | 0.685           | 49.811   |

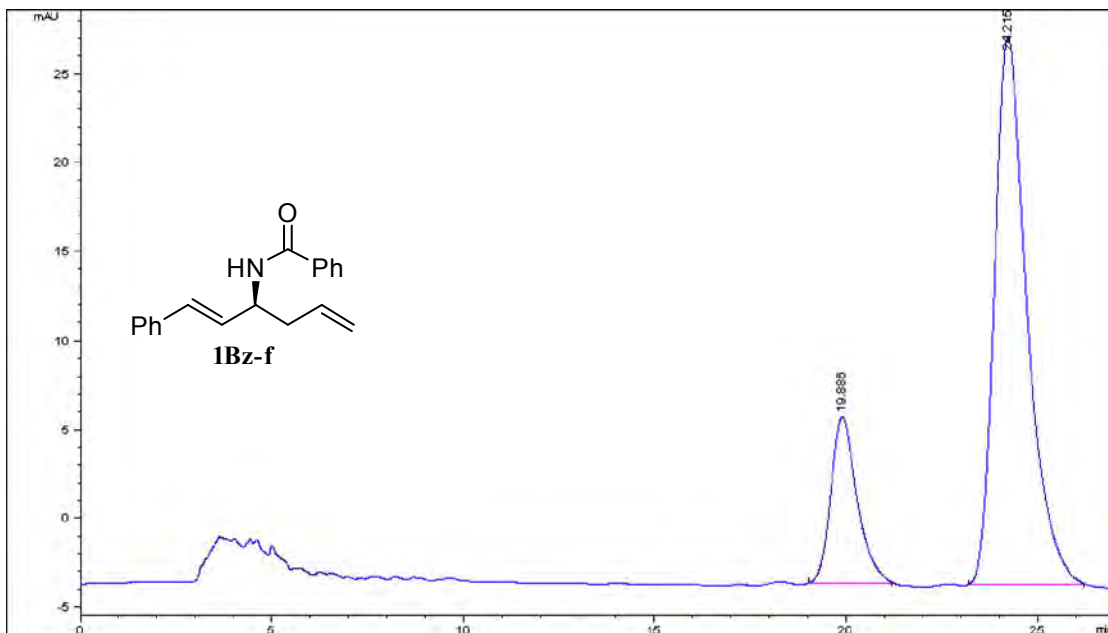

| Number | Time (min) | Area (mAU·s) | Height (mAU) | Width (min) | Symmetry factor | Area (%) |
|--------|------------|--------------|--------------|-------------|-----------------|----------|
| 1      | 19.886     | 452.4        | 9.4          | 0.7015      | 0.724           | 19.829   |
| 2      | 24.215     | 1829.1       | 30.8         | 0.8901      | 0.656           | 80.171   |

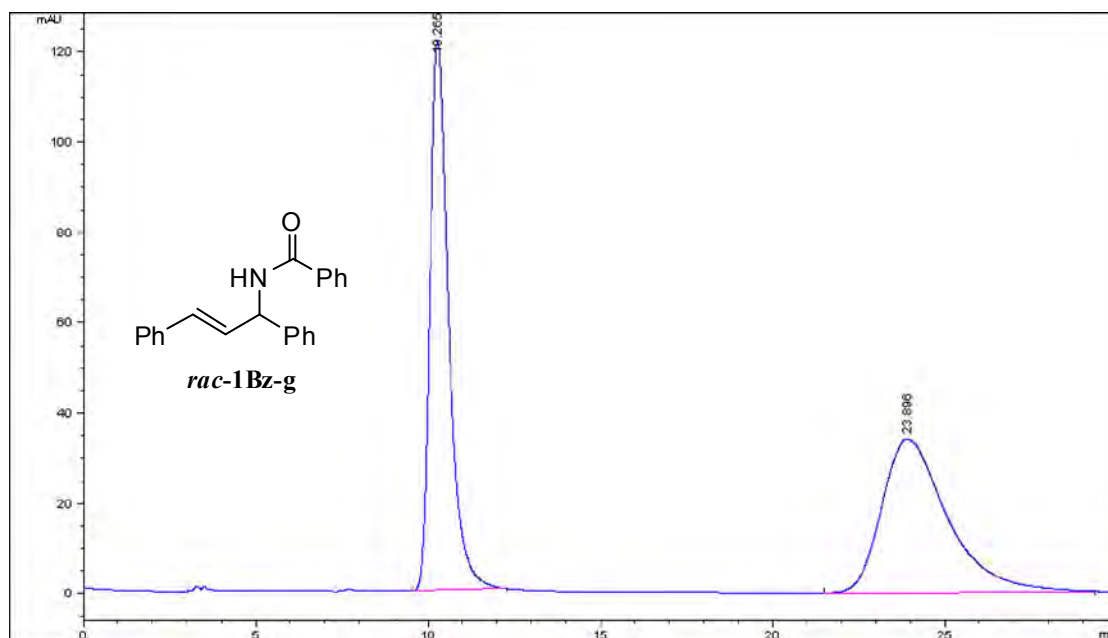

| Number | Time (min) | Area (mAU·s) | Height (mAU) | Width (min) | Symmetry factor | Area (%) |
|--------|------------|--------------|--------------|-------------|-----------------|----------|
| 1      | 10.265     | 4585.9       | 121.8        | 0.5687      | 0.629           | 50.190   |
| 2      | 23.896     | 4551.1       | 34.2         | 2.2187      | 0.609           | 49.810   |

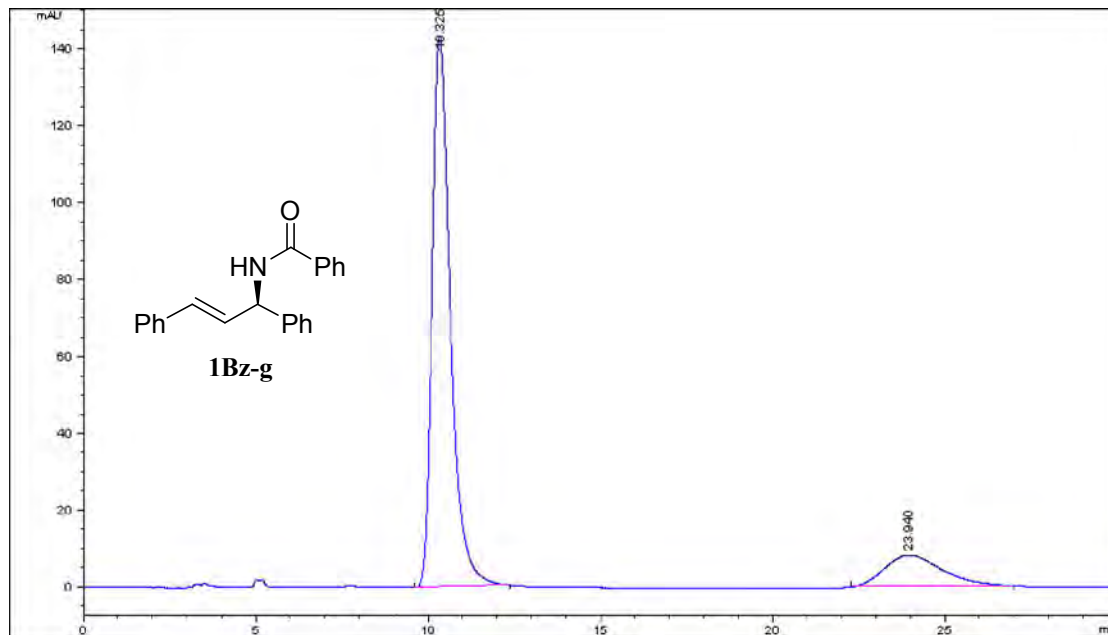

| Number | Time (min) | Area (mAU·s) | Height (mAU) | Width (min) | Symmetry factor | Area (%) |
|--------|------------|--------------|--------------|-------------|-----------------|----------|
| 1      | 10.325     | 5266.5       | 143.3        | 0.554       | 0.635           | 84.784   |
| 2      | 23.94      | 945.1        | 8.1          | 1.946       | 0.695           | 15.216   |

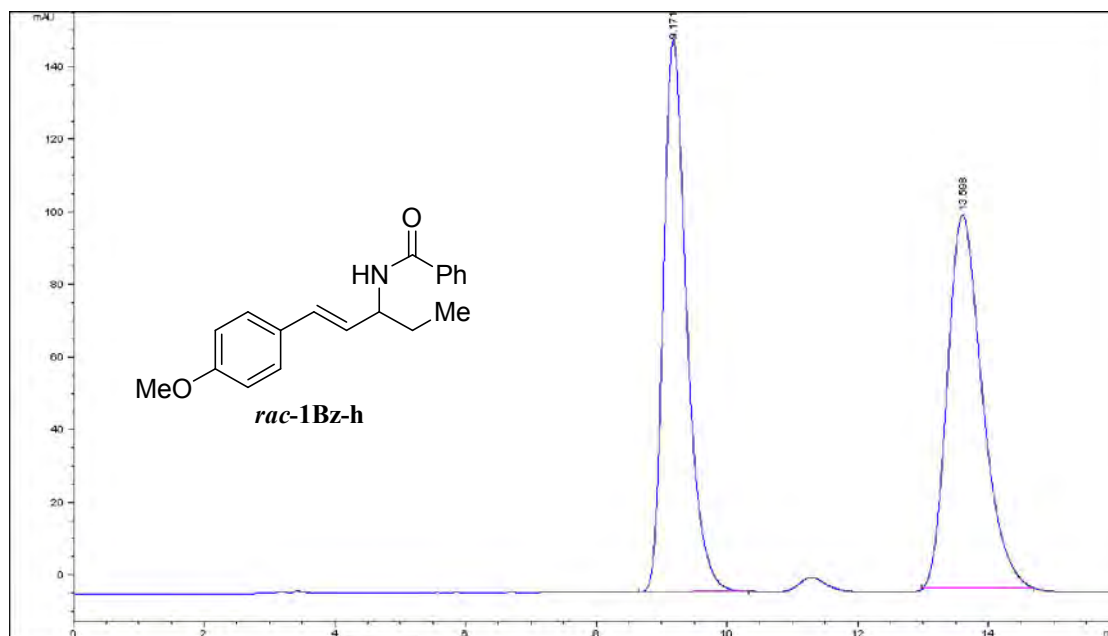

| Number | Time (min) | Area (mAU·s) | Height (mAU) | Width (min) | Symmetry factor | Area (%) |
|--------|------------|--------------|--------------|-------------|-----------------|----------|
| 1      | 9.171      | 3761.9       | 152.3        | 0.3755      | 0.682           | 49.636   |
| 2      | 13.598     | 3817         | 102.8        | 0.6187      | 0.738           | 50.364   |

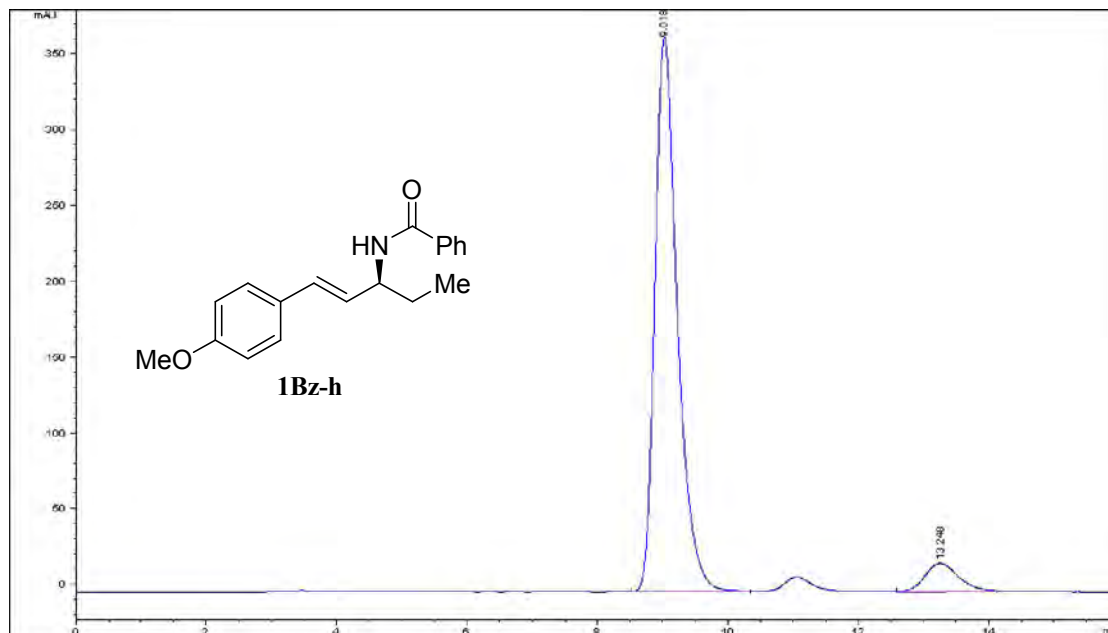

| Number | Time (min) | Area (mAU·s) | Height (mAU) | Width (min) | Symmetry factor | Area (%) |
|--------|------------|--------------|--------------|-------------|-----------------|----------|
| 1      | 9.018      | 8753.5       | 365.5        | 0.3624      | 0.666           | 92.599   |
| 2      | 13.248     | 699.6        | 19.1         | 0.6106      | 0.819           | 7.401    |

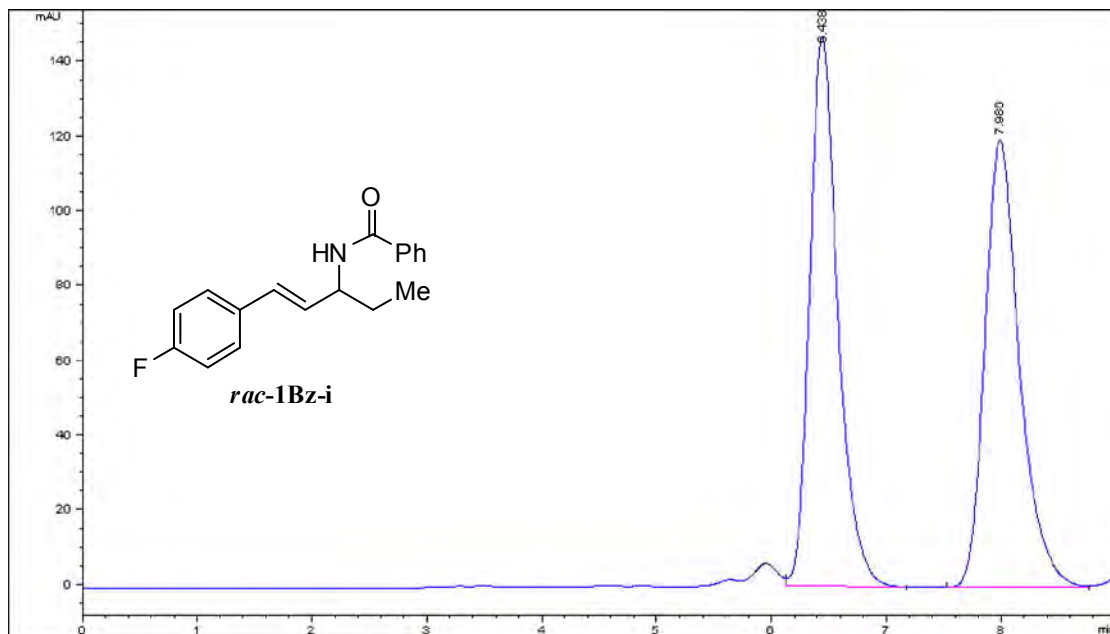

| Number | Time (min) | Area (mAU·s) | Height (mAU) | Width (min) | Symmetry factor | Area (%) |
|--------|------------|--------------|--------------|-------------|-----------------|----------|
| 1      | 6.438      | 2519.5       | 147.1        | 0.2609      | 0.752           | 50.070   |
| 2      | 7.986      | 2512.5       | 119.8        | 0.3175      | 0.724           | 49.930   |

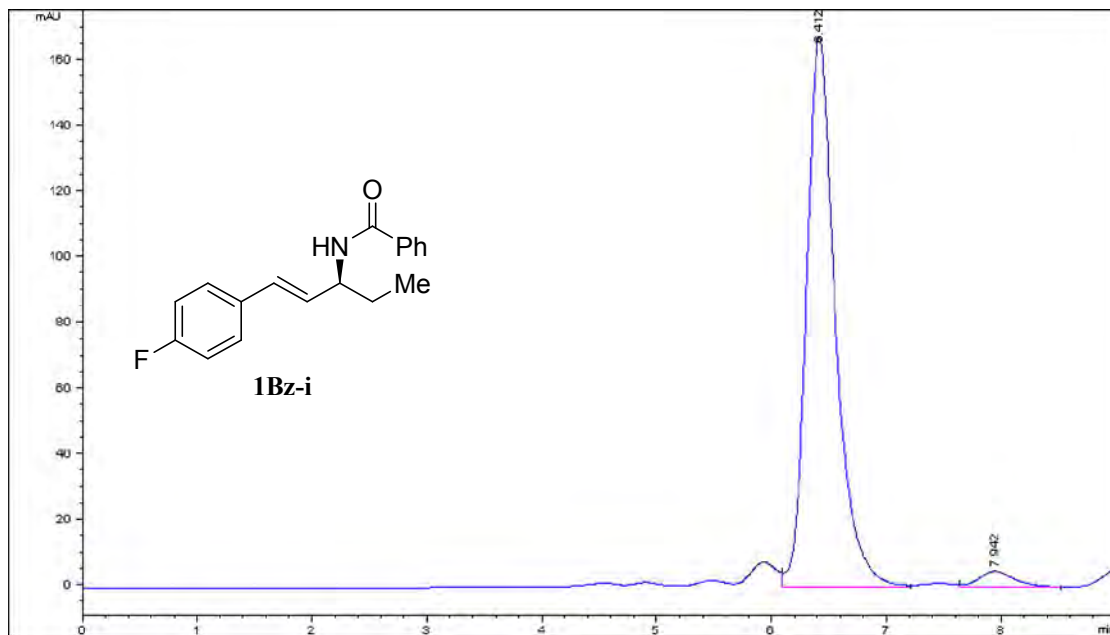

| Number | Time (min) | Area (mAU·s) | Height (mAU) | Width (min) | Symmetry factor | Area (%) |
|--------|------------|--------------|--------------|-------------|-----------------|----------|
| 1      | 6.412      | 2936.3       | 167.5        | 0.2642      | 0.73            | 96.457   |
| 2      | 7.942      | 107.8        | 4.9          | 0.3265      | 0.775           | 3.543    |

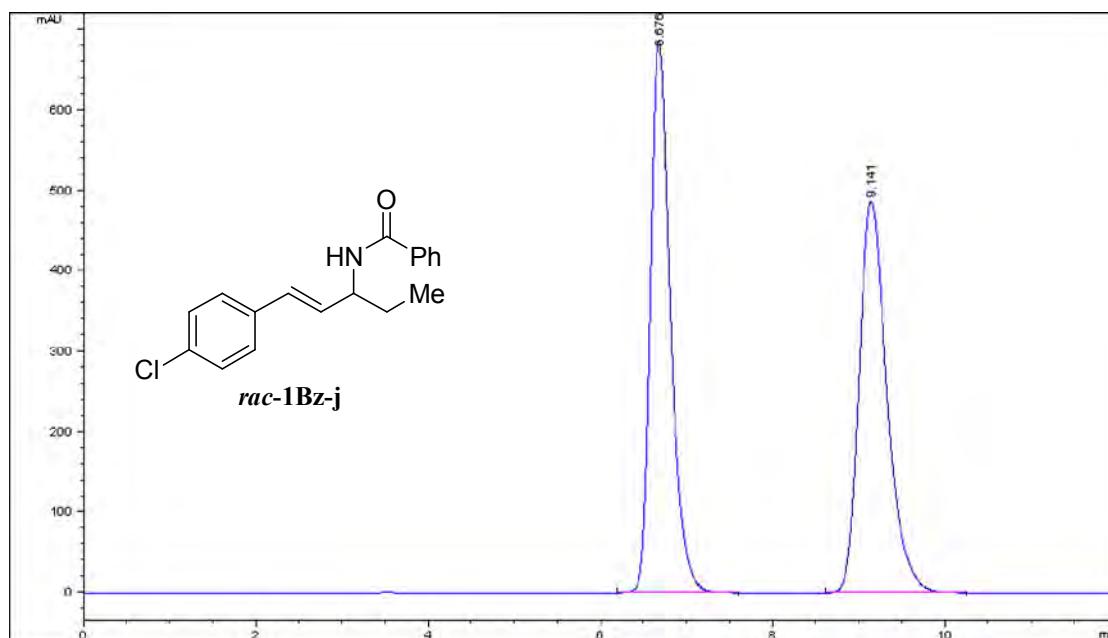

| Number | Time (min) | Area (mAU·s) | Height (mAU) | Width (min) | Symmetry factor | Area (%) |
|--------|------------|--------------|--------------|-------------|-----------------|----------|
| 1      | 6.676      | 10992        | 687.2        | 0.2419      | 0.699           | 50.115   |
| 2      | 9.141      | 10941.7      | 486.1        | 0.3427      | 0.724           | 49.885   |

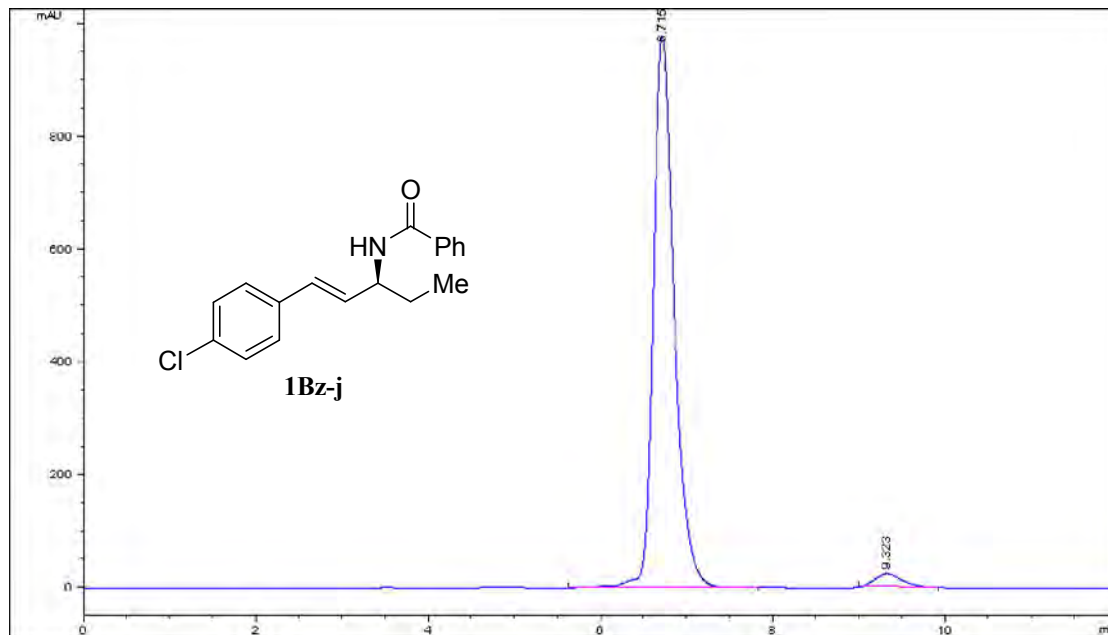

| Number | Time (min) | Area (mAU·s) | Height (mAU) | Width (min) | Symmetry factor | Area (%) |
|--------|------------|--------------|--------------|-------------|-----------------|----------|
| 1      | 6.715      | 16399.7      | 978.3        | 0.2794      | 0.731           | 96.931   |
| 2      | 9.323      | 519.2        | 23.5         | 0.3686      | 0.766           | 3.069    |

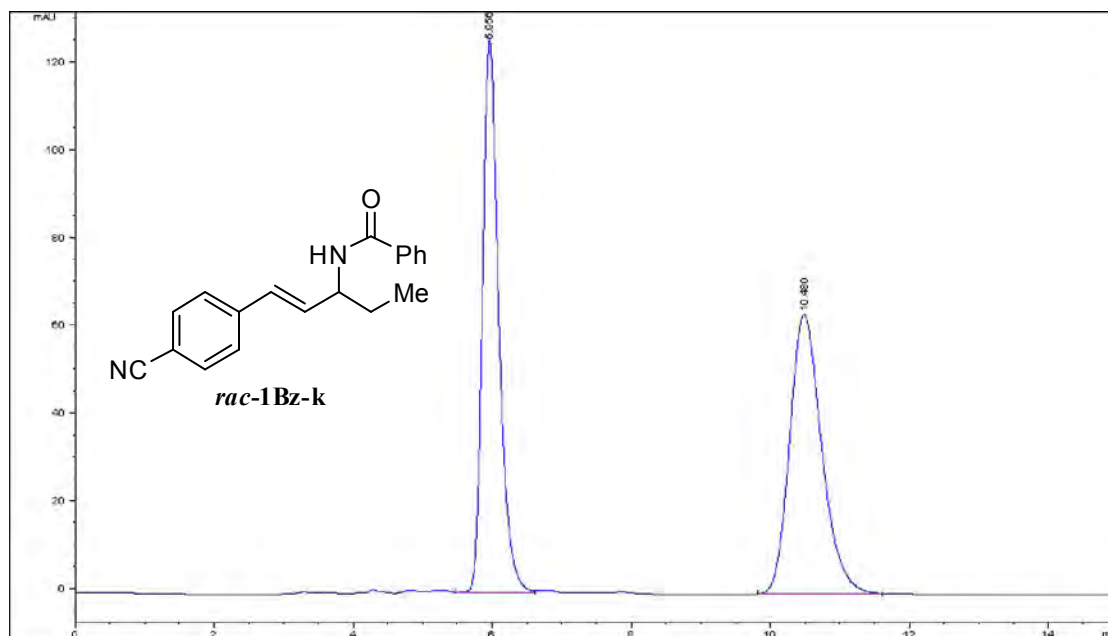

| Number | Time (min) | Area (mAU·s) | Height (mAU) | Width (min) | Symmetry factor | Area (%) |
|--------|------------|--------------|--------------|-------------|-----------------|----------|
| 1      | 5.956      | 2056.9       | 126.2        | 0.247       | 0.712           | 50.183   |
| 2      | 10.48      | 2041.9       | 63.7         | 0.4919      | 0.774           | 49.817   |

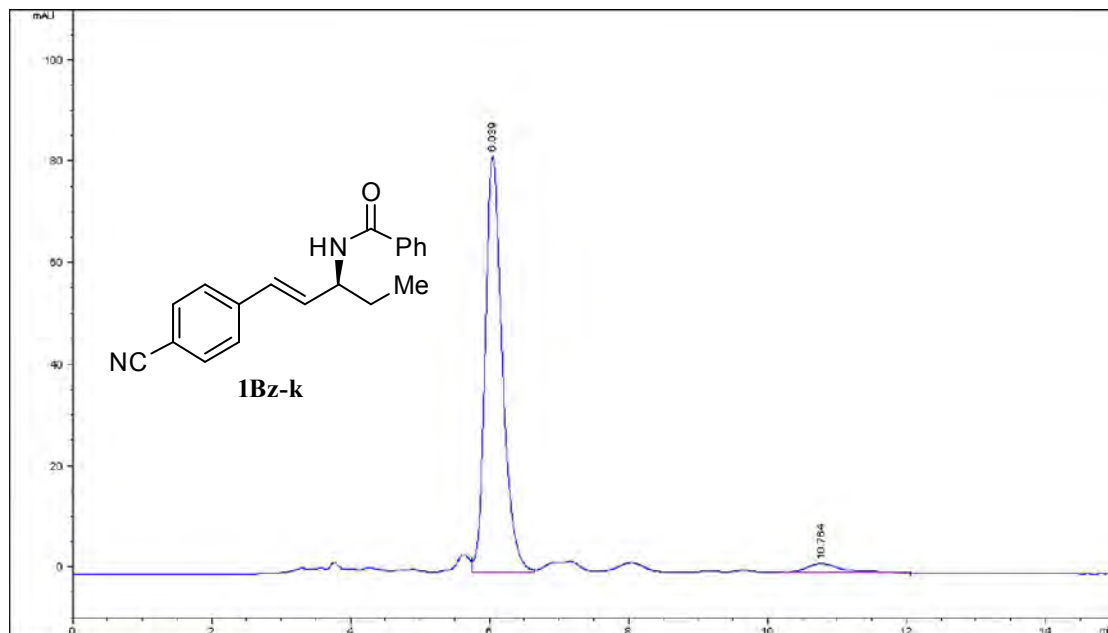

| Number | Time (min) | Area (mAU·s) | Height (mAU) | Width (min) | Symmetry factor | Area (%) |
|--------|------------|--------------|--------------|-------------|-----------------|----------|
| 1      | 6.039      | 1404.9       | 82.2         | 0.2592      | 0.727           | 95.382   |
| 2      | 10.764     | 68           | 1.8          | 0.5495      | 0.597           | 4.618    |

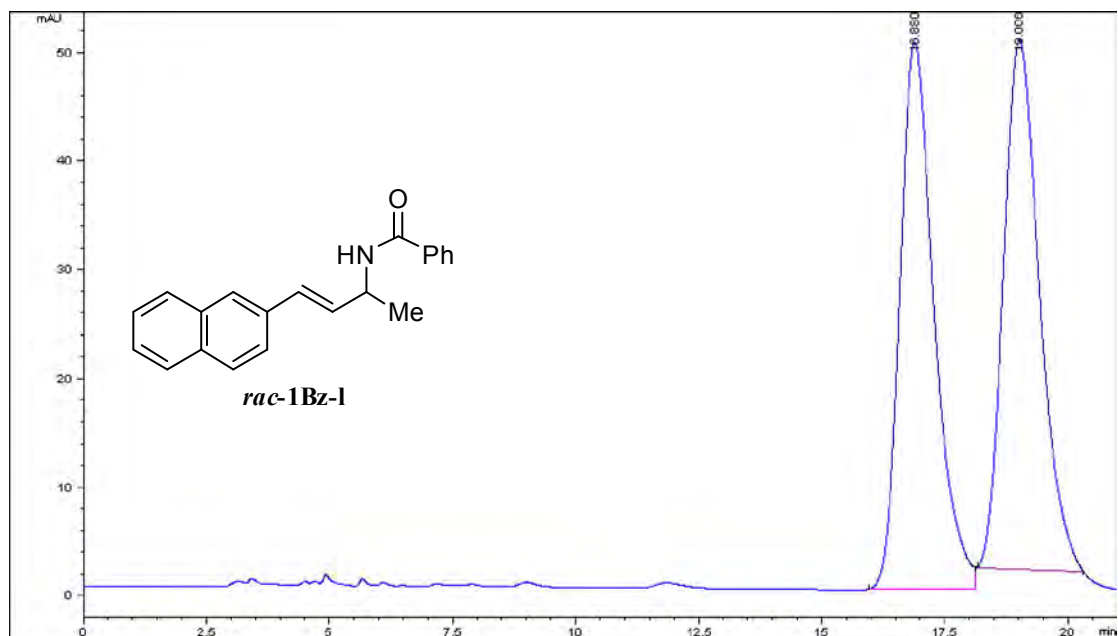

| Number | Time (min) | Area (mAU·s) | Height (mAU) | Width (min) | Symmetry factor | Area (%) |
|--------|------------|--------------|--------------|-------------|-----------------|----------|
| 1      | 16.88      | 2435.9       | 50.3         | 0.7276      | 0.712           | 49.544   |
| 2      | 19.006     | 2480.7       | 48.8         | 0.8468      | 0.766           | 50.456   |

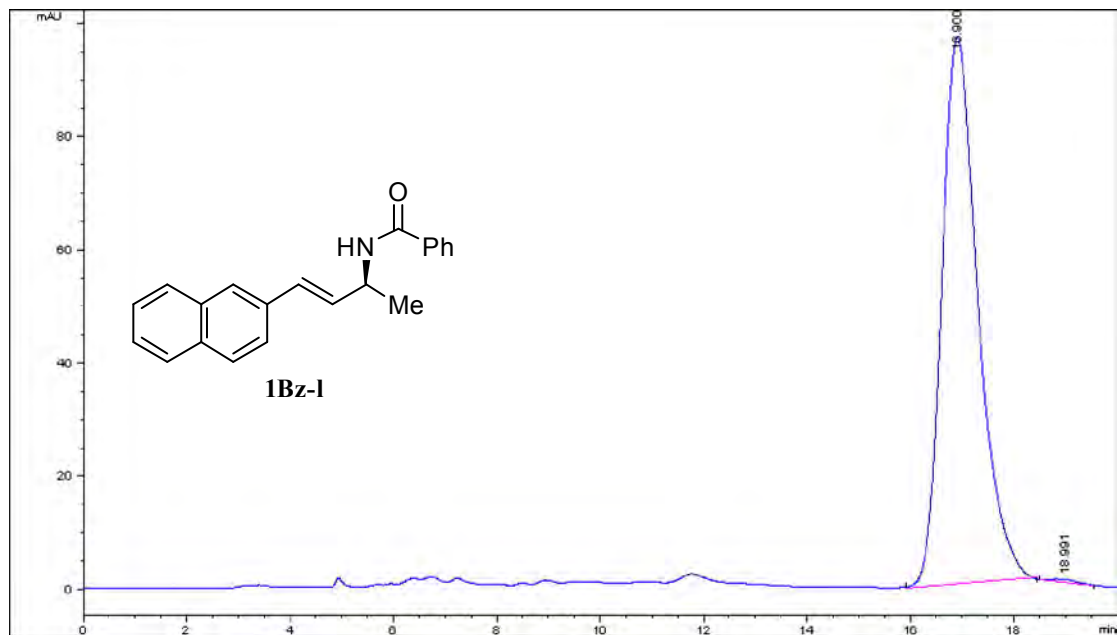

| Number | Time (min) | Area (mAU·s) | Height (mAU) | Width (min) | Symmetry factor | Area (%) |
|--------|------------|--------------|--------------|-------------|-----------------|----------|
| 1      | 16.9       | 4698         | 96.7         | 0.8094      | 0.722           | 99.488   |
| 2      | 18.991     | 24.2         | 6.2E-1       | 0.6502      | 0.243           | 0.512    |



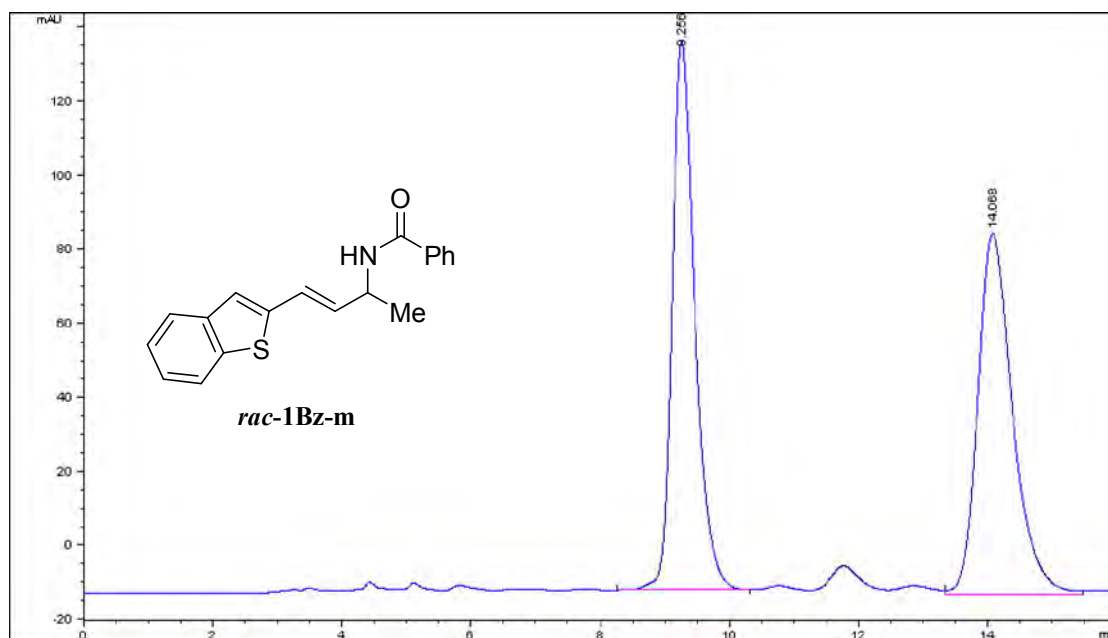

| Number | Time (min) | Area (mAU·s) | Height (mAU) | Width (min) | Symmetry factor | Area (%) |
|--------|------------|--------------|--------------|-------------|-----------------|----------|
| 1      | 9.256      | 3613.1       | 148.5        | 0.3682      | 0.706           | 49.716   |
| 2      | 14.068     | 3654.4       | 97.5         | 0.6245      | 0.72            | 50.284   |

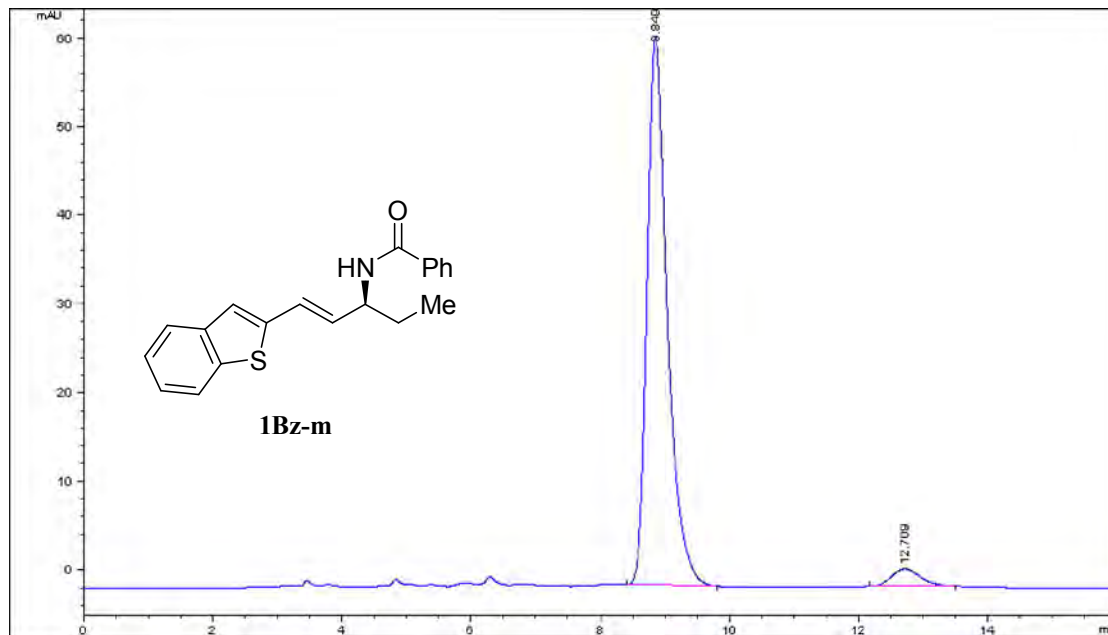

| Number | Time (min) | Area (mAU·s) | Height (mAU) | Width (min) | Symmetry factor | Area (%) |
|--------|------------|--------------|--------------|-------------|-----------------|----------|
| 1      | 8.849      | 1347.6       | 62           | 0.3266      | 0.668           | 95.657   |
| 2      | 12.709     | 61.2         | 2            | 0.4374      | 0.808           | 4.343    |

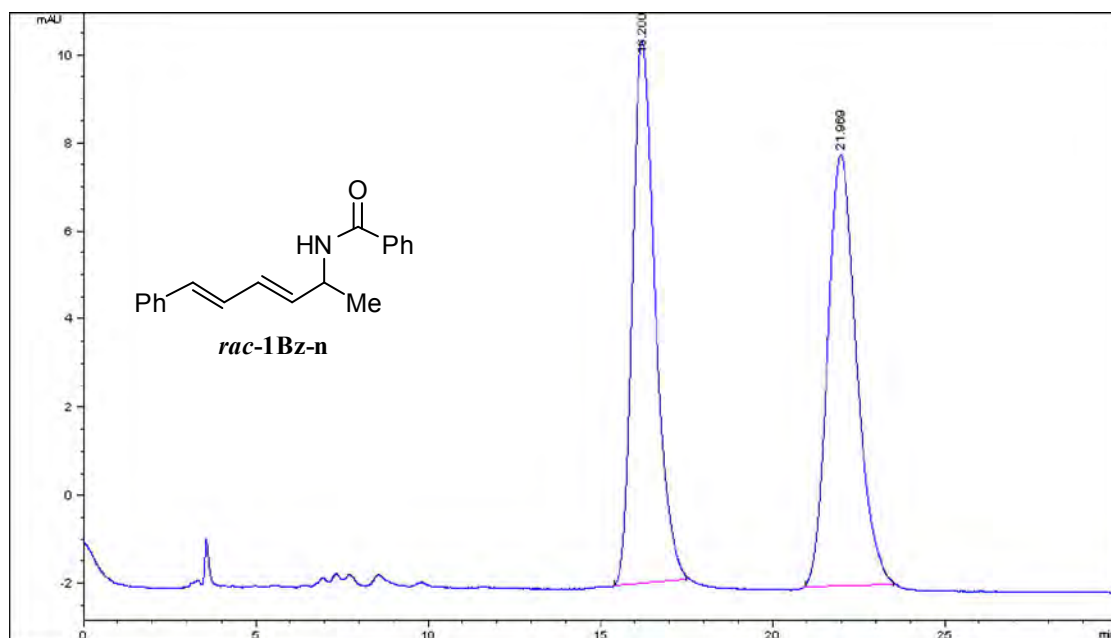

| Number | Time (min) | Area (mAU·s) | Height (mAU) | Width (min) | Symmetry factor | Area (%) |
|--------|------------|--------------|--------------|-------------|-----------------|----------|
| 1      | 16.2       | 568.8        | 12.3         | 0.6982      | 0.696           | 49.784   |
| 2      | 21.969     | 573.8        | 9.8          | 0.8517      | 0.793           | 50.216   |

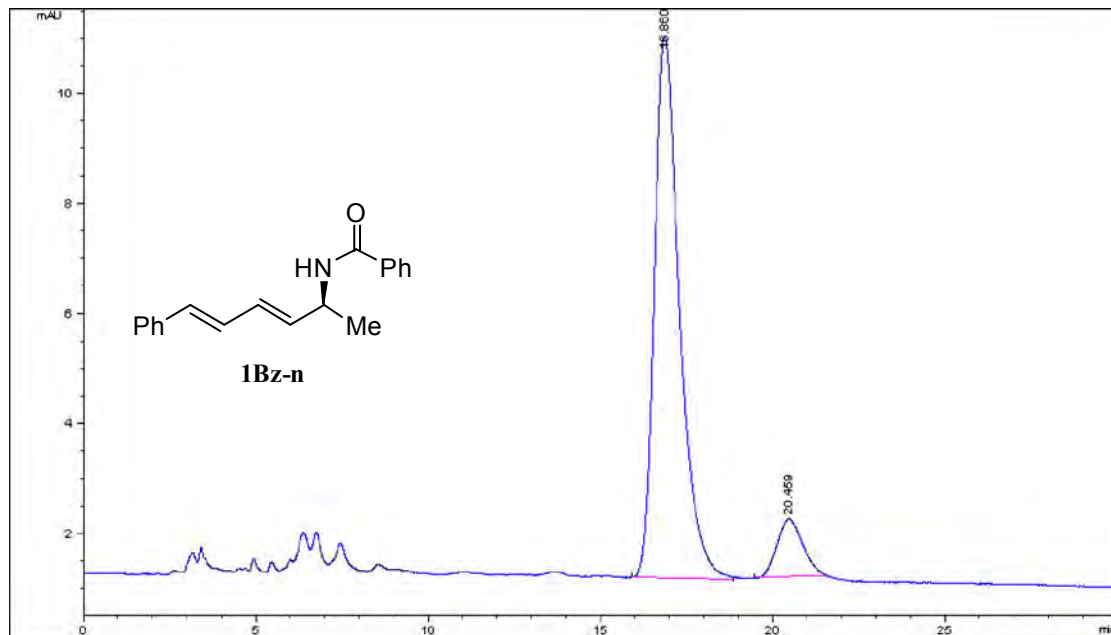

| Number | Time (min) | Area (mAU·s) | Height (mAU) | Width (min) | Symmetry factor | Area (%) |
|--------|------------|--------------|--------------|-------------|-----------------|----------|
| 1      | 16.86      | 499.6        | 9.9          | 0.8453      | 0.674           | 89.908   |
| 2      | 20.459     | 56.1         | 1.1          | 0.8821      | 0.81            | 10.032   |

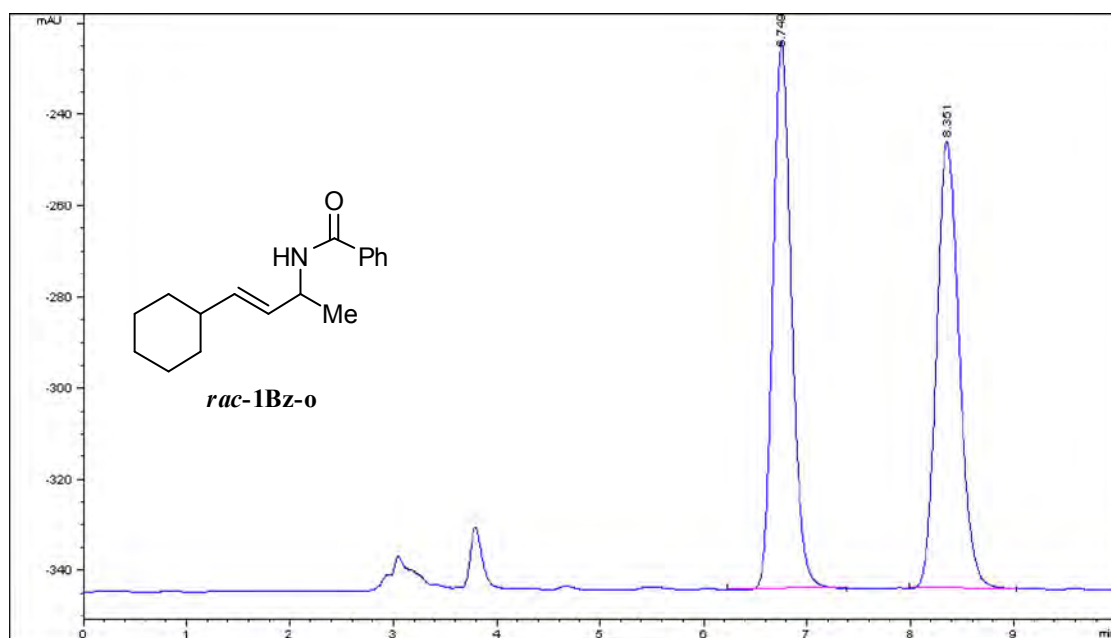

| Number | Time (min) | Area (mAU·s) | Height (mAU) | Width (min) | Symmetry factor | Area (%) |
|--------|------------|--------------|--------------|-------------|-----------------|----------|
| 1      | 6.749      | 1507.8       | 120.3        | 0.1928      | 0.804           | 50.250   |
| 2      | 8.351      | 1492.9       | 98.1         | 0.2357      | 0.827           | 49.750   |

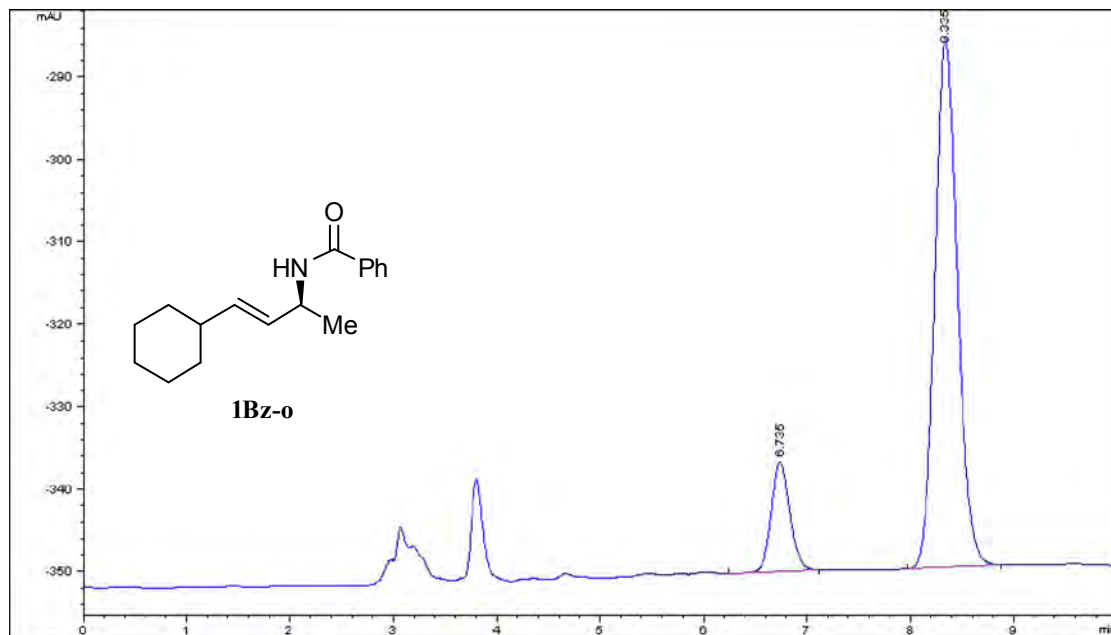

| Number | Time (min) | Area (mAU·s) | Height (mAU) | Width (min) | Symmetry factor | Area (%) |
|--------|------------|--------------|--------------|-------------|-----------------|----------|
| 1      | 6.735      | 169.3        | 13.4         | 0.1941      | 0.868           | 14.792   |
| 2      | 8.335      | 975.2        | 64.4         | 0.235       | 0.842           | 85.208   |

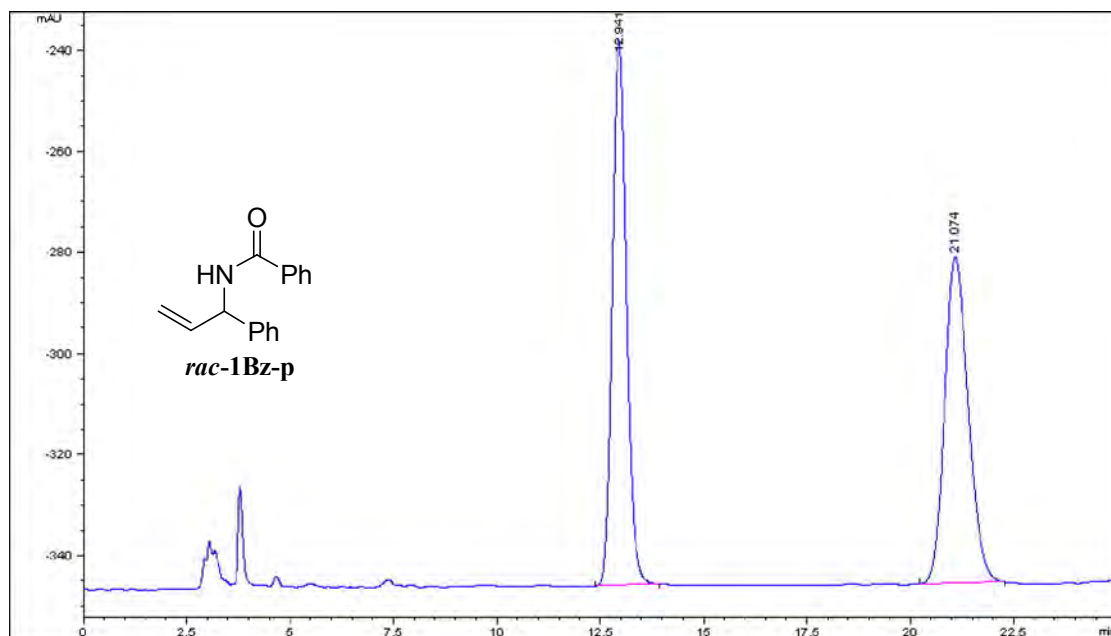

| Number | Time (min) | Area (mAU·s) | Height (mAU) | Width (min) | Symmetry factor | Area (%) |
|--------|------------|--------------|--------------|-------------|-----------------|----------|
| 1      | 12.941     | 2573.1       | 108.1        | 0.3693      | 0.832           | 50.025   |
| 2      | 21.074     | 2570.5       | 64.6         | 0.6145      | 0.779           | 49.975   |

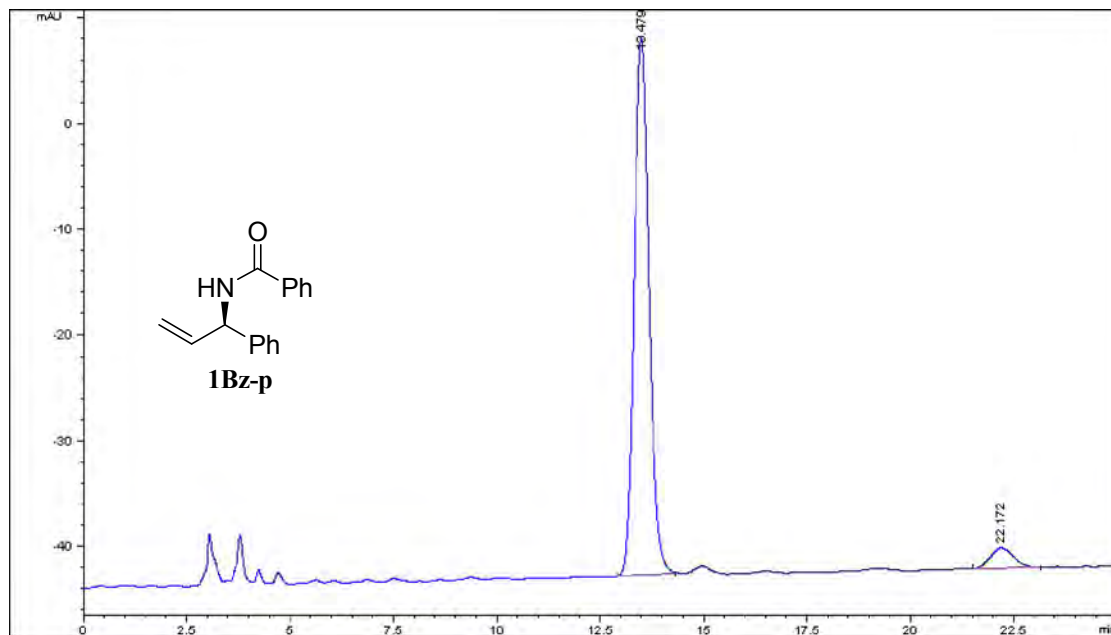

| Number | Time (min) | Area (mAU·s) | Height (mAU) | Width (min) | Symmetry factor | Area (%) |
|--------|------------|--------------|--------------|-------------|-----------------|----------|
| 1      | 13.479     | 1265.6       | 50.9         | 0.3864      | 0.845           | 94.479   |
| 2      | 22.172     | 74           | 1.9          | 0.5517      | 0.783           | 5.521    |

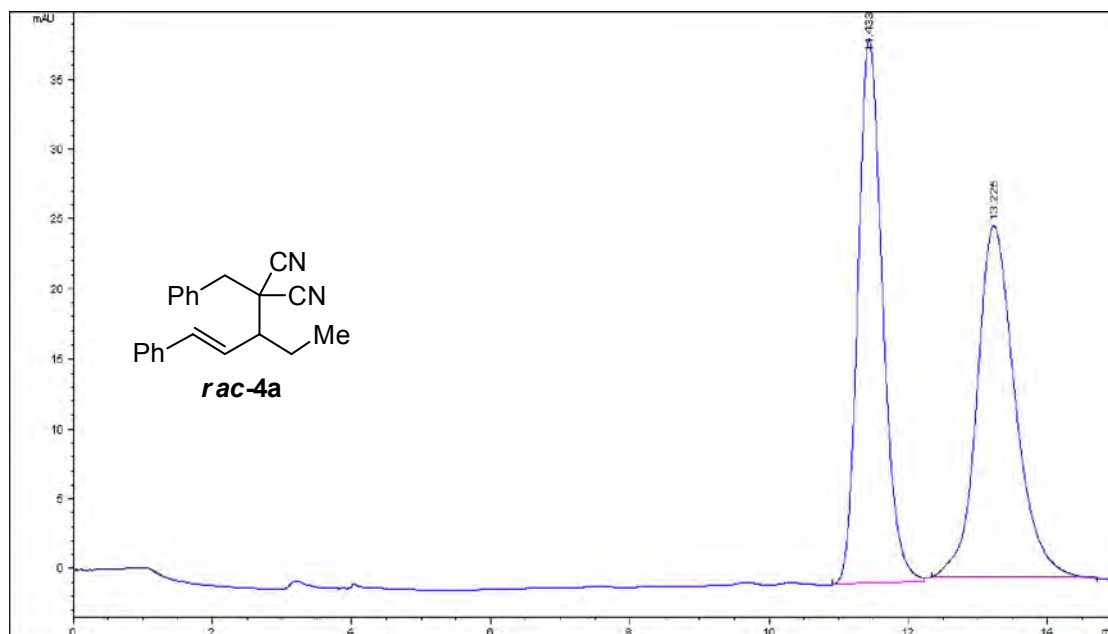

| Number | Time (min) | Area (mAU·s) | Height (mAU) | Width (min) | Symmetry factor | Area (%) |
|--------|------------|--------------|--------------|-------------|-----------------|----------|
| 1      | 11.433     | 958.8        | 39           | 0.3788      | 0.789           | 49.970   |
| 2      | 13.225     | 959.9        | 25.1         | 0.6362      | 0.778           | 50.030   |

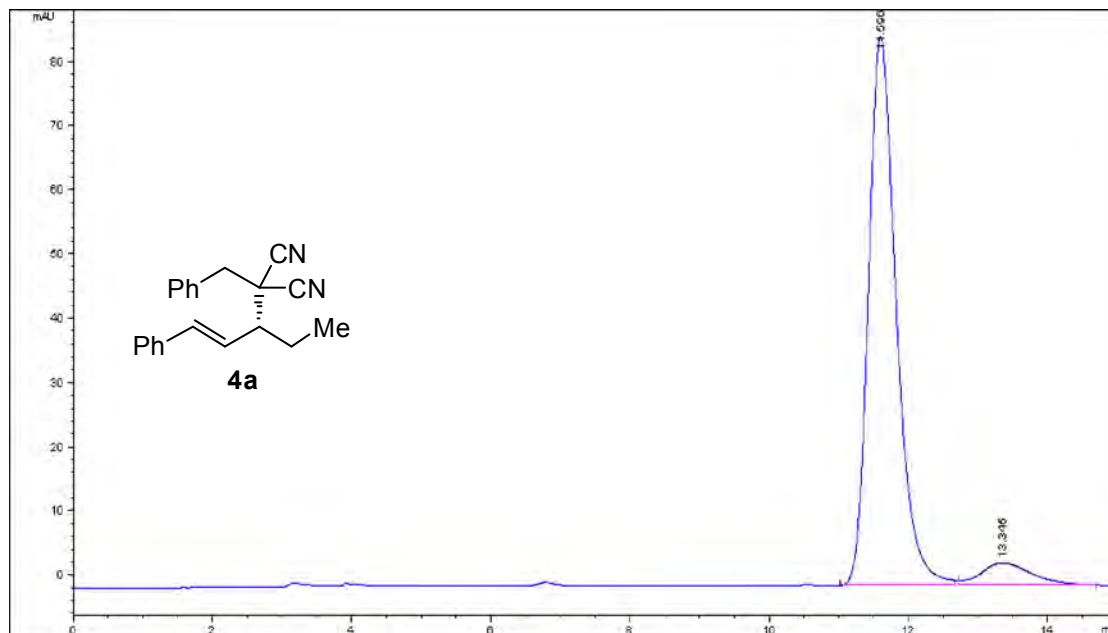

| Number | Time (min) | Area (mAU·s) | Height (mAU) | Width (min) | Symmetry factor | Area (%) |
|--------|------------|--------------|--------------|-------------|-----------------|----------|
| 1      | 11.596     | 2364.2       | 85.4         | 0.4221      | 0.722           | 92.961   |
| 2      | 13.345     | 179          | 3.5          | 0.7241      | 0.709           | 7.039    |

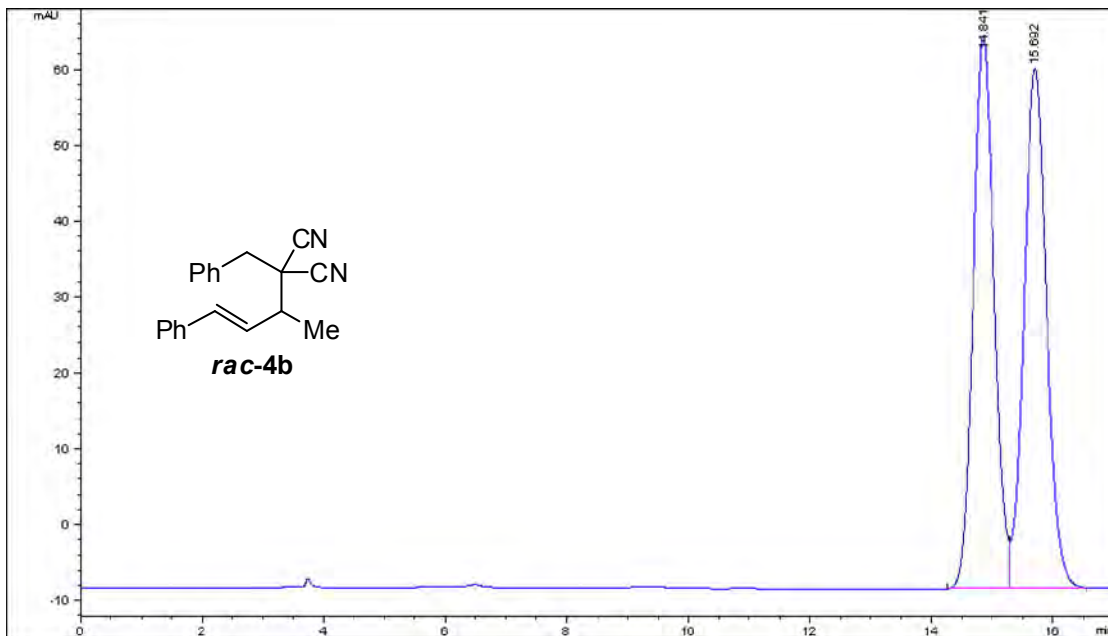

| Number | Time (min) | Area (mAU·s) | Height (mAU) | Width (min) | Symmetry factor | Area (%) |
|--------|------------|--------------|--------------|-------------|-----------------|----------|
| 1      | 14.841     | 1730.5       | 72.8         | 0.3692      | 0.896           | 49.597   |
| 2      | 15.692     | 1758.6       | 68.5         | 0.3971      | 0.905           | 50.403   |

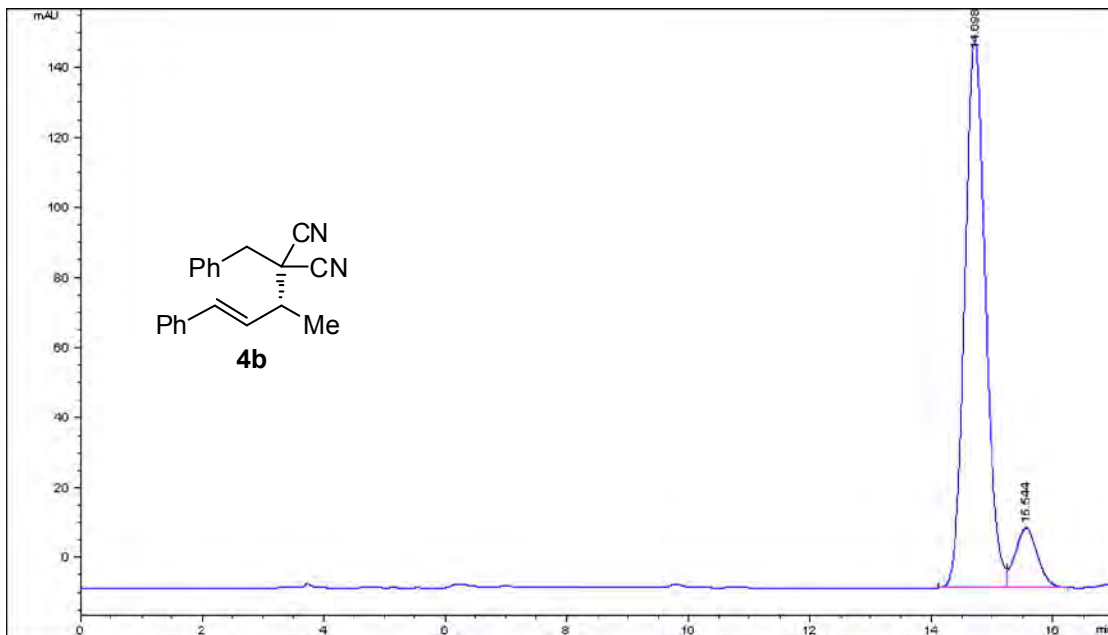

| Number | Time (min) | Area (mAU·s) | Height (mAU) | Width (min) | Symmetry factor | Area (%) |
|--------|------------|--------------|--------------|-------------|-----------------|----------|
| 1      | 14.698     | 3717.9       | 157.5        | 0.3643      | 0.875           | 89.569   |
| 2      | 15.544     | 433          | 17.1         | 0.3891      | 0.896           | 10.431   |

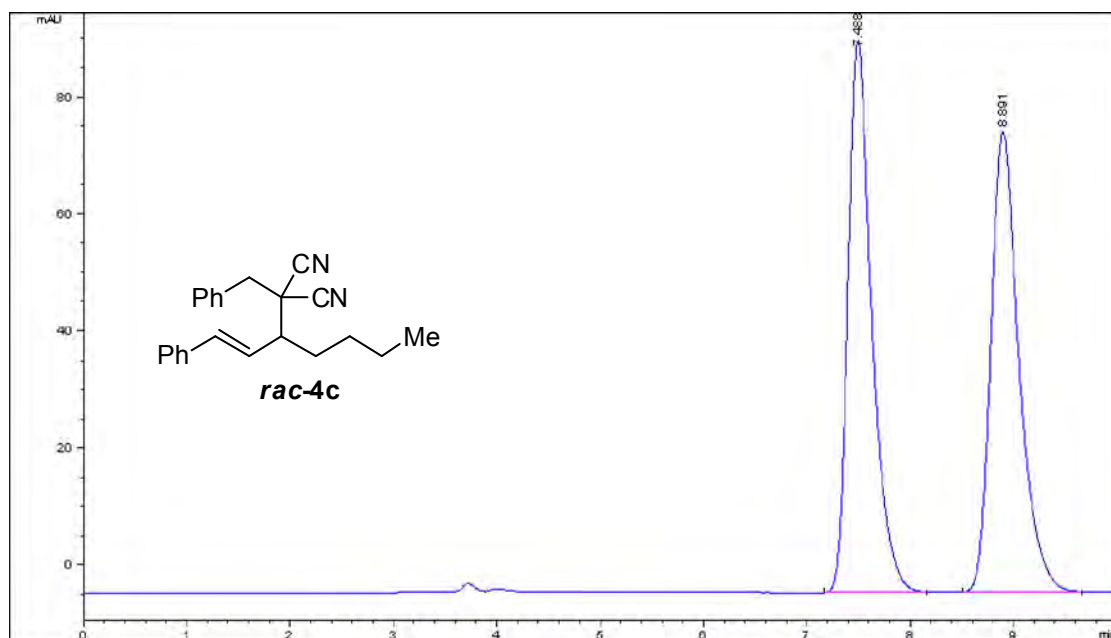

| Number | Time (min) | Area (mAU·s) | Height (mAU) | Width (min) | Symmetry factor | Area (%) |
|--------|------------|--------------|--------------|-------------|-----------------|----------|
| 1      | 7.488      | 1499.8       | 94.3         | 0.2394      | 0.659           | 50.209   |
| 2      | 8.891      | 1487.3       | 78.6         | 0.2849      | 0.697           | 49.791   |

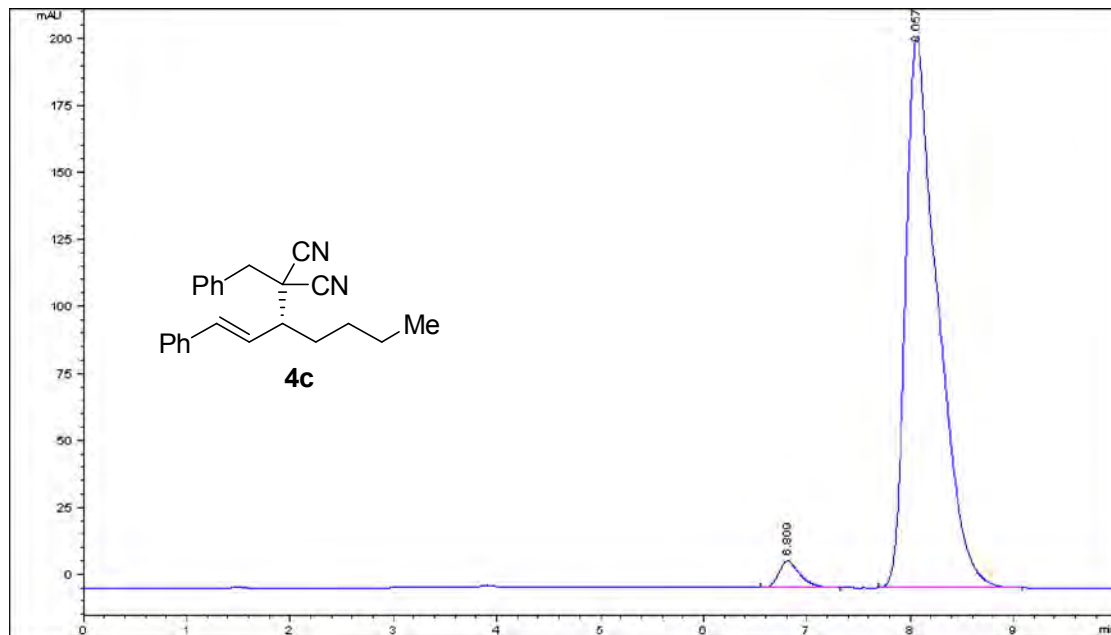

| Number | Time (min) | Area (mAU·s) | Height (mAU) | Width (min) | Symmetry factor | Area (%) |
|--------|------------|--------------|--------------|-------------|-----------------|----------|
| 1      | 6.809      | 140.1        | 10           | 0.2106      | 0.672           | 3.082    |
| 2      | 8.057      | 4405         | 205.8        | 0.3036      | 0.49            | 96.918   |

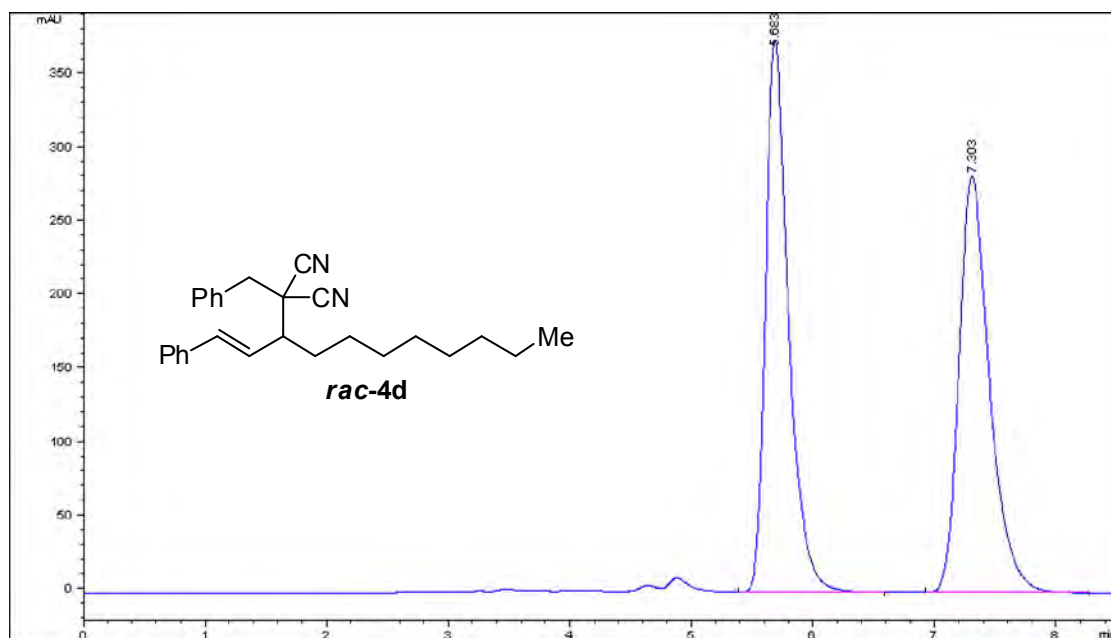

| Number | Time (min) | Area (mAU·s) | Height (mAU) | Width (min) | Symmetry factor | Area (%) |
|--------|------------|--------------|--------------|-------------|-----------------|----------|
| 1      | 5.683      | 4938.3       | 374.8        | 0.1974      | 0.638           | 50.107   |
| 2      | 7.303      | 4917.3       | 282          | 0.2631      | 0.693           | 49.893   |

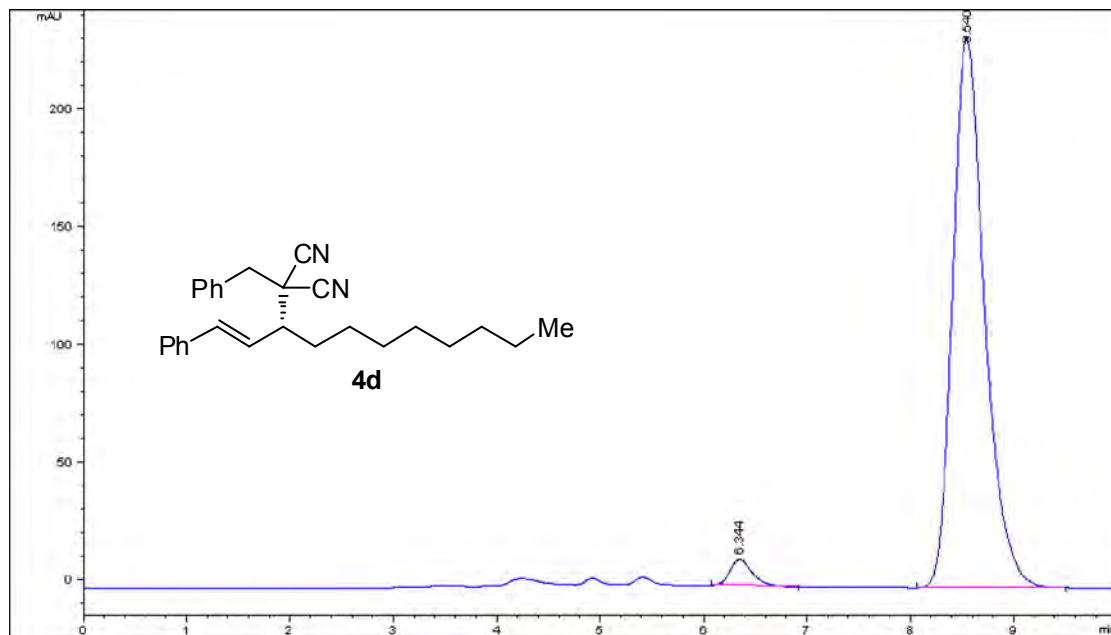

|   | Time (min) | Area (mAU·s) | Height (mAU) | Width (min) | Symmetry factor | Area (%) |
|---|------------|--------------|--------------|-------------|-----------------|----------|
| 1 | 6.344      | 167.7        | 11.2         | 0.2291      | 0.718           | 3.229    |
| 2 | 8.54       | 5024.3       | 234.2        | 0.3275      | 0.723           | 96.771   |



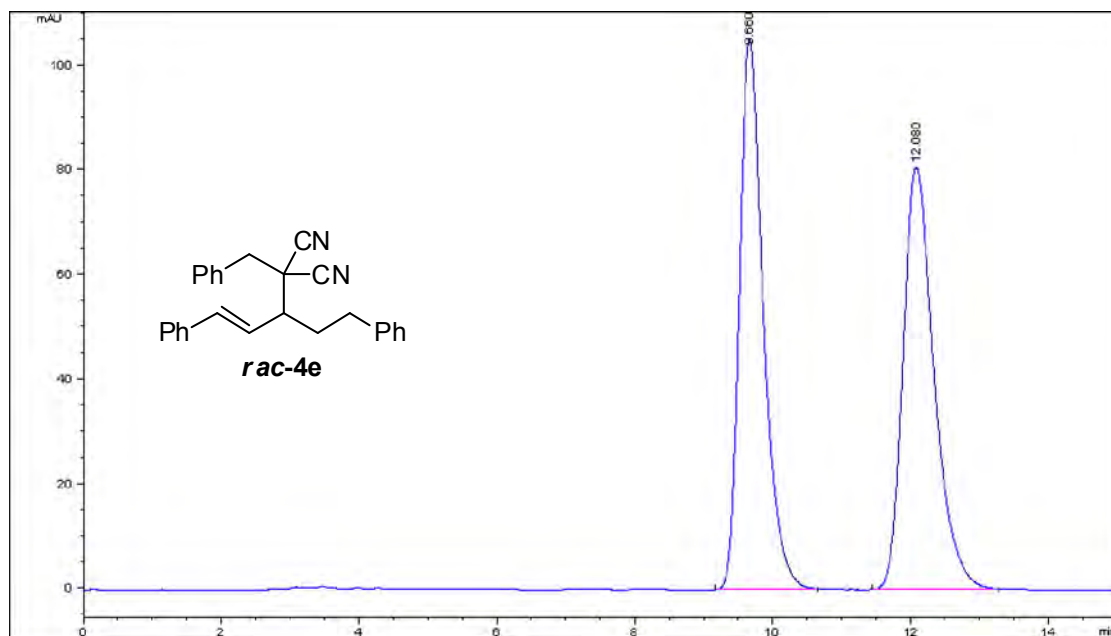

| Number | Time (min) | Area (mAU·s) | Height (mAU) | Width (min) | Symmetry factor | Area (%) |
|--------|------------|--------------|--------------|-------------|-----------------|----------|
| 1      | 9.66       | 2529.1       | 105.2        | 0.3649      | 0.677           | 50.049   |
| 2      | 12.08      | 2524.1       | 80.7         | 0.4785      | 0.693           | 49.951   |

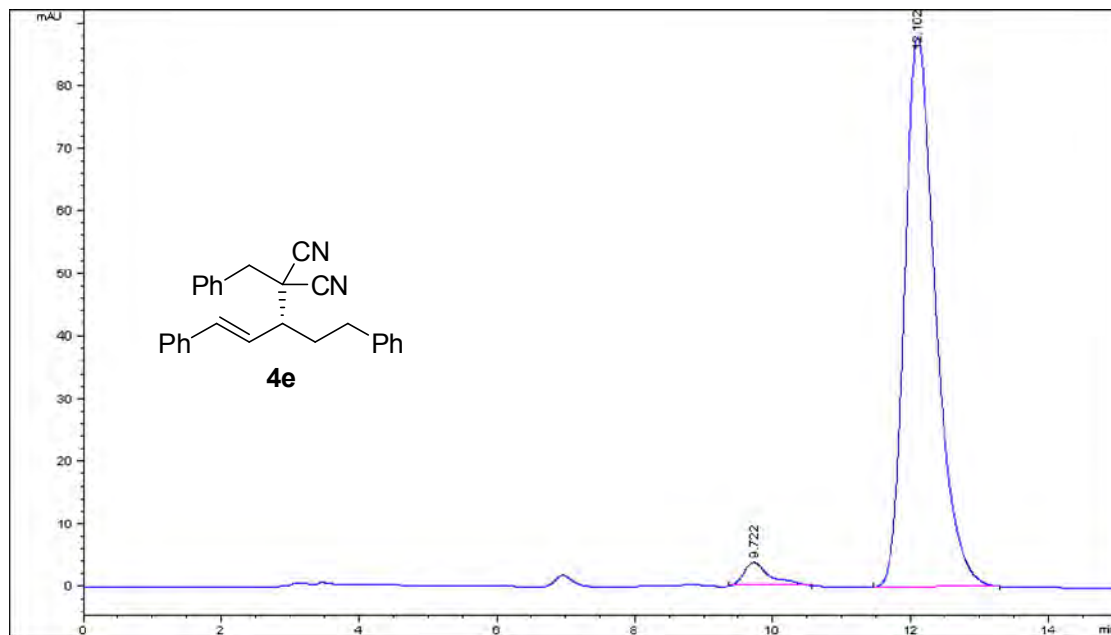

| Number | Time (min) | Area (mAU·s) | Height (mAU) | Width (min) | Symmetry factor | Area (%) |
|--------|------------|--------------|--------------|-------------|-----------------|----------|
| 1      | 9.722      | 99.7         | 3.7          | 0.4523      | 0.567           | 3.500    |
| 2      | 12.102     | 2749.3       | 87.8         | 0.4789      | 0.694           | 96.500   |

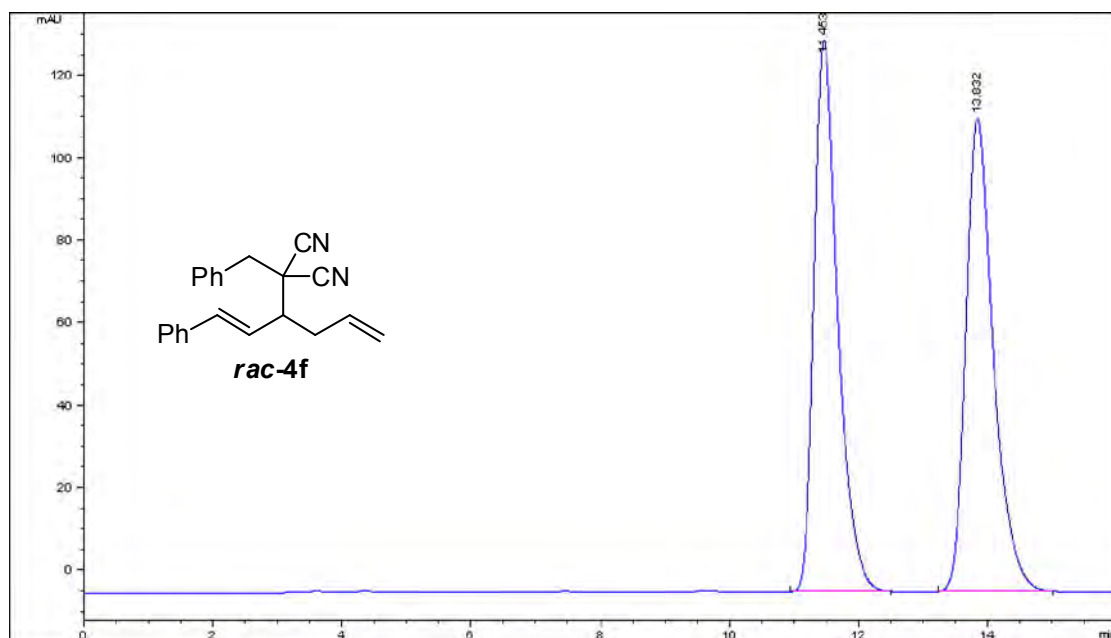

| Number | Time (min) | Area (mAU·s) | Height (mAU) | Width (min) | Symmetry factor | Area (%) |
|--------|------------|--------------|--------------|-------------|-----------------|----------|
| 1      | 11.453     | 3043.1       | 133.7        | 0.3829      | 0.646           | 50.028   |
| 2      | 13.832     | 3399.3       | 114.7        | 0.4461      | 0.682           | 49.972   |

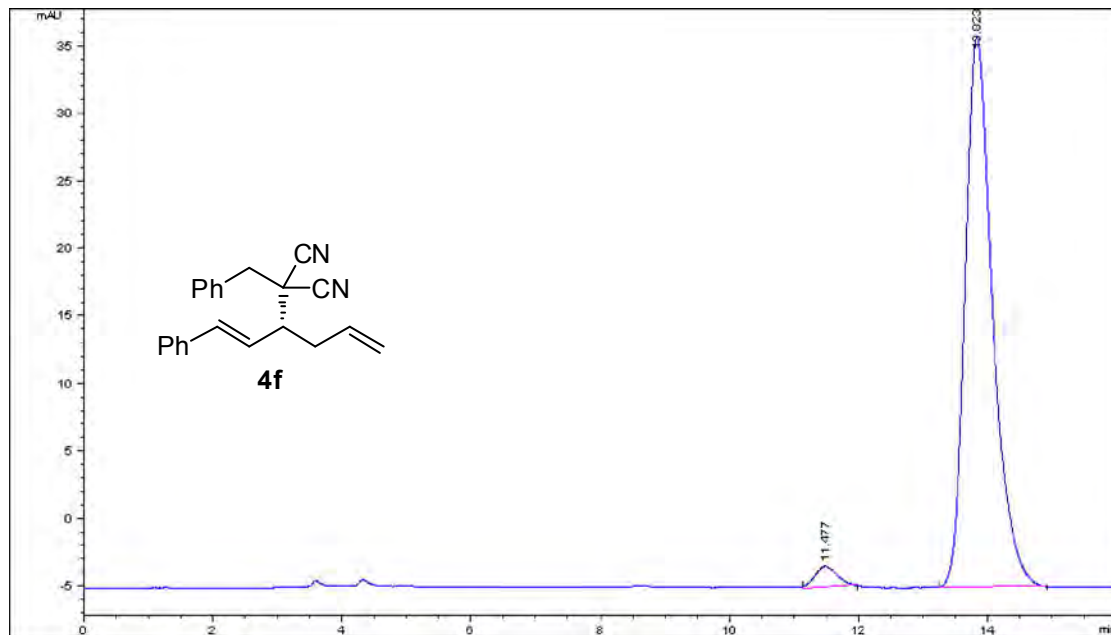

| Number | Time (min) | Area (mAU·s) | Height (mAU) | Width (min) | Symmetry factor | Area (%) |
|--------|------------|--------------|--------------|-------------|-----------------|----------|
| 1      | 11.477     | 36.4         | 1.5          | 0.3923      | 0.877           | 2.937    |
| 2      | 13.823     | 1204.1       | 40.8         | 0.4477      | 0.701           | 97.063   |

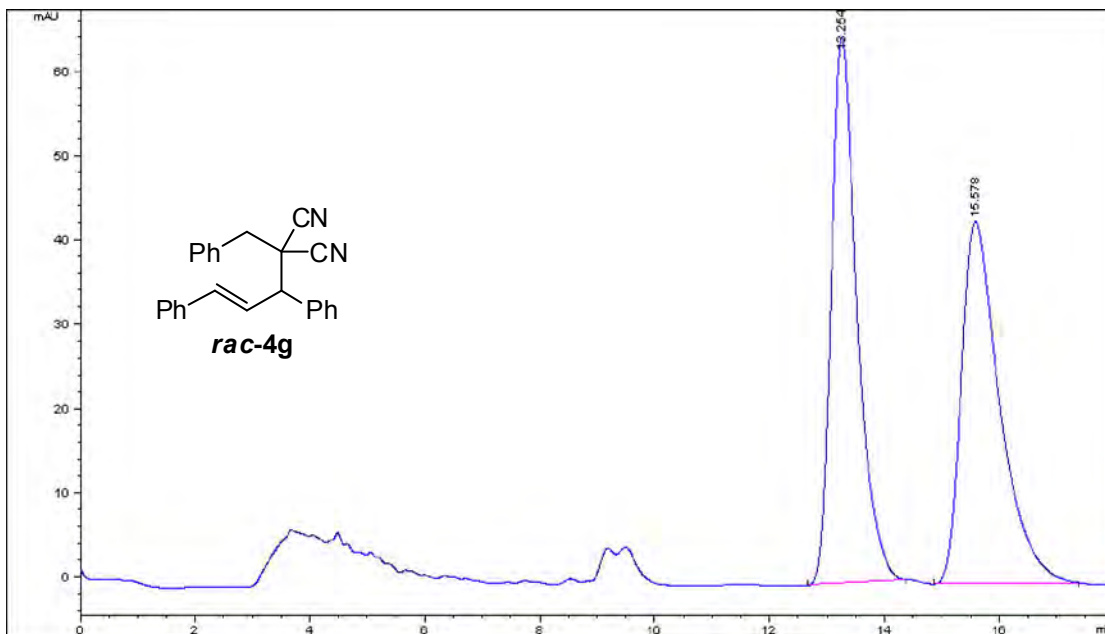

| Number | Time (min) | Area (mAU·s) | Height (mAU) | Width (min) | Symmetry factor | Area (%) |
|--------|------------|--------------|--------------|-------------|-----------------|----------|
| 1      | 13.254     | 2026.7       | 64.8         | 0.4682      | 0.654           | 50.330   |
| 2      | 15.578     | 2000.1       | 42.9         | 0.6904      | 0.539           | 49.670   |

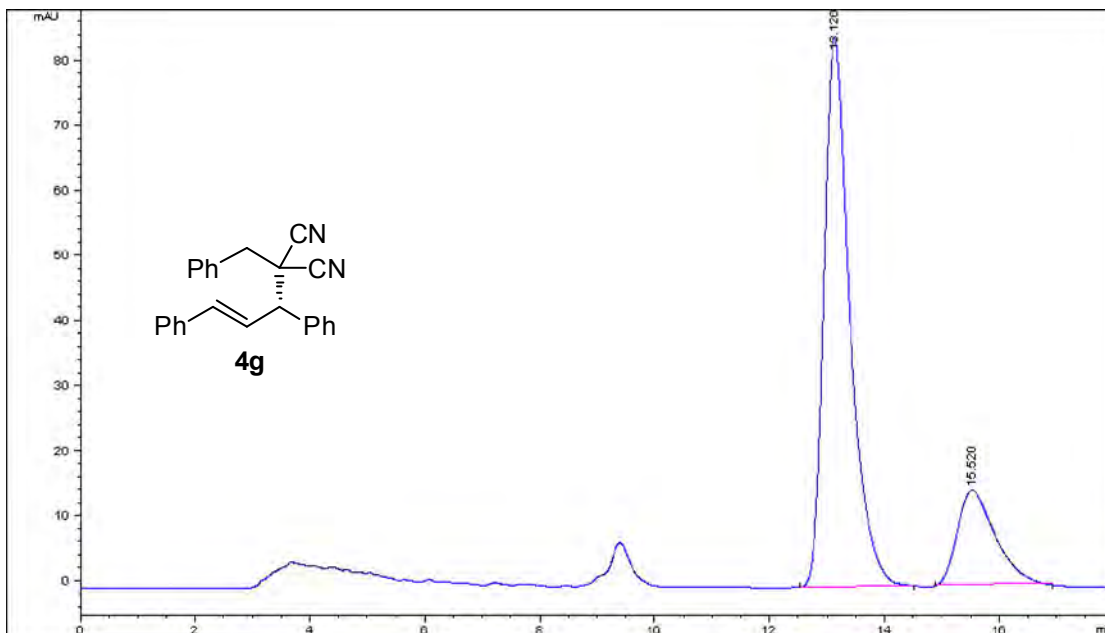

| Number | Time (min) | Area (mAU·s) | Height (mAU) | Width (min) | Symmetry factor | Area (%) |
|--------|------------|--------------|--------------|-------------|-----------------|----------|
| 1      | 13.126     | 2662.4       | 84.6         | 0.4718      | 0.639           | 80.000   |
| 2      | 15.52      | 665.6        | 14.6         | 0.7623      | 0.619           | 20.000   |

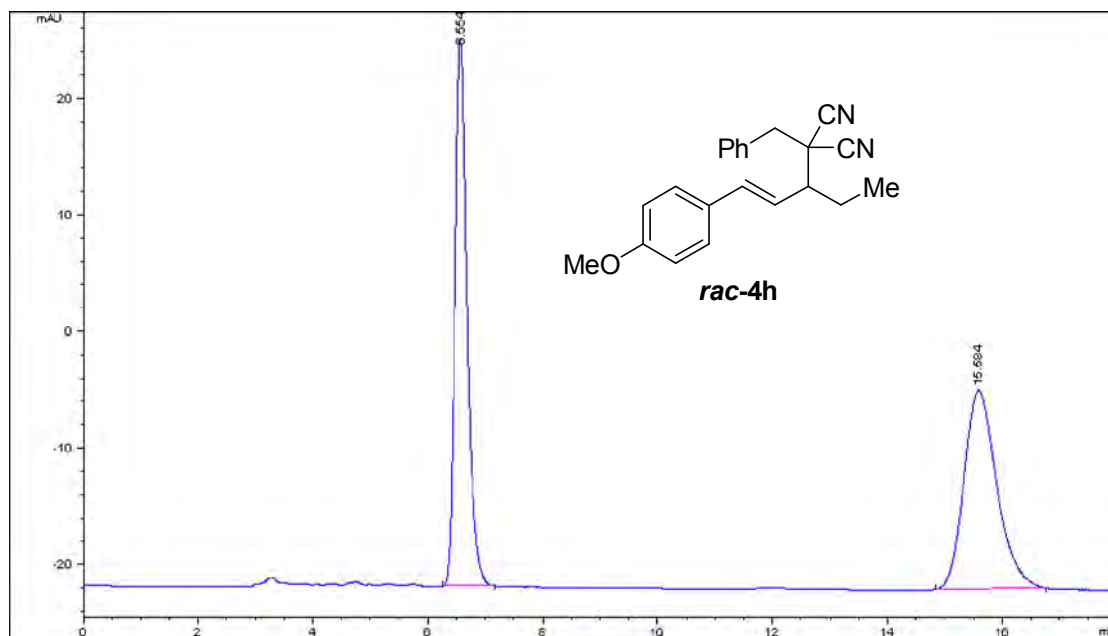

| Number | Time (min) | Area (mAU·s) | Height (mAU) | Width (min) | Symmetry factor | Area (%) |
|--------|------------|--------------|--------------|-------------|-----------------|----------|
| 1      | 6.554      | 684.2        | 47           | 0.221       | 0.716           | 50.094   |
| 2      | 15.584     | 681.6        | 17.1         | 0.6091      | 0.767           | 49.906   |

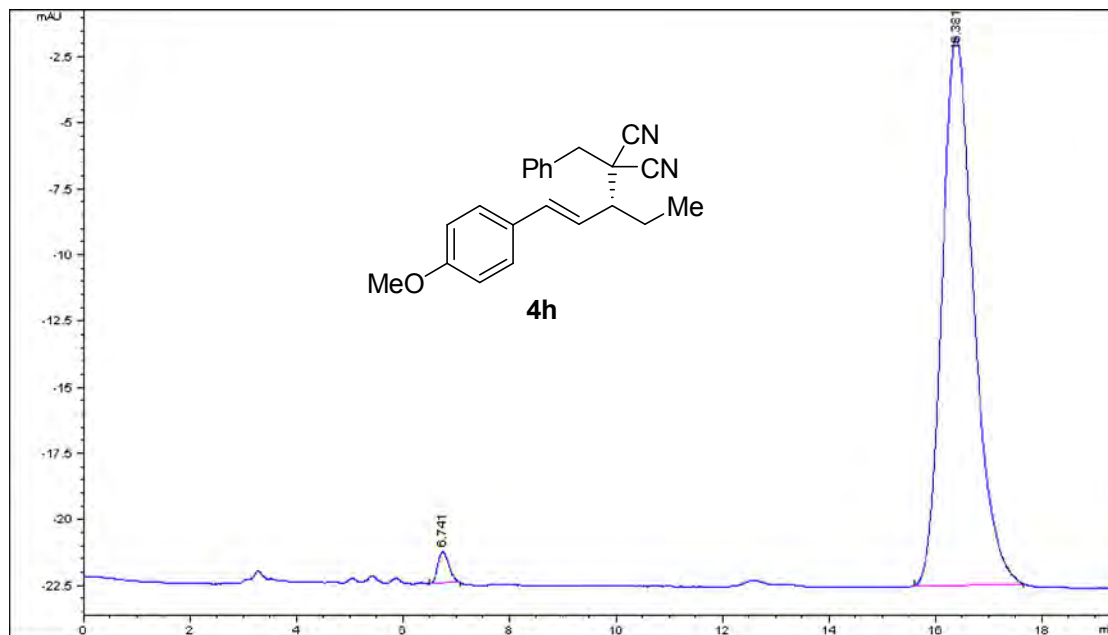

| Number | Time (min) | Area (mAU·s) | Height (mAU) | Width (min) | Symmetry factor | Area (%) |
|--------|------------|--------------|--------------|-------------|-----------------|----------|
| 1      | 6.741      | 17.5         | 1.2          | 0.241       | 0.791           | 1.989    |
| 2      | 16.381     | 862.1        | 20.8         | 0.6326      | 0.752           | 98.011   |

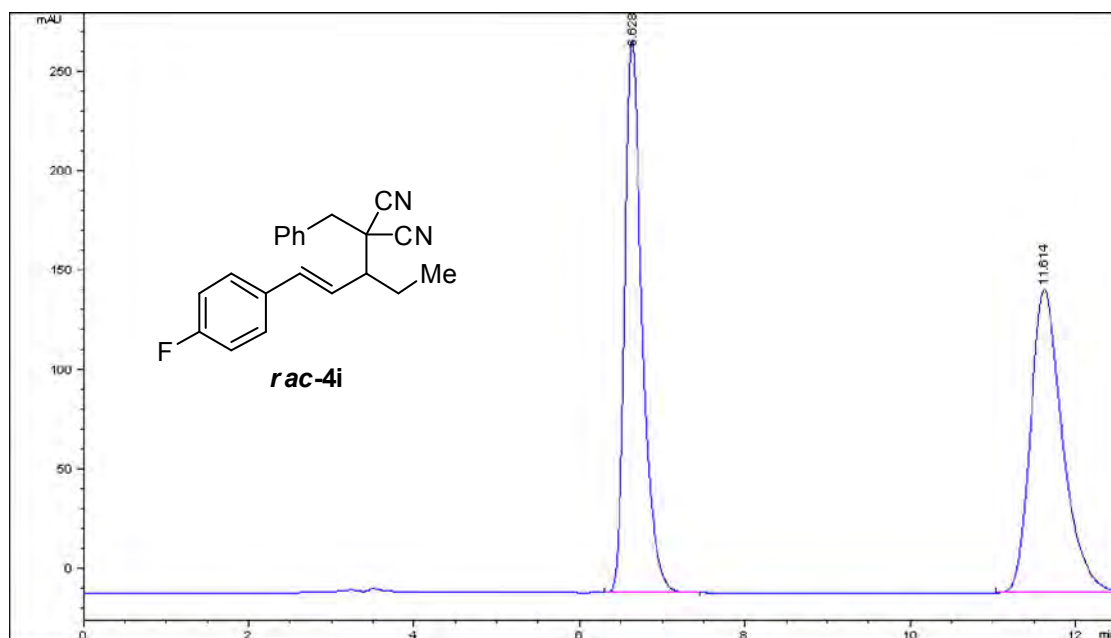

| Number | Time (min) | Area (mAU·s) | Height (mAU) | Width (min) | Symmetry factor | Area (%) |
|--------|------------|--------------|--------------|-------------|-----------------|----------|
| 1      | 6.628      | 4070.1       | 277.5        | 0.2206      | 0.663           | 49.768   |
| 2      | 11.614     | 4108         | 152.1        | 0.4083      | 0.698           | 50.232   |

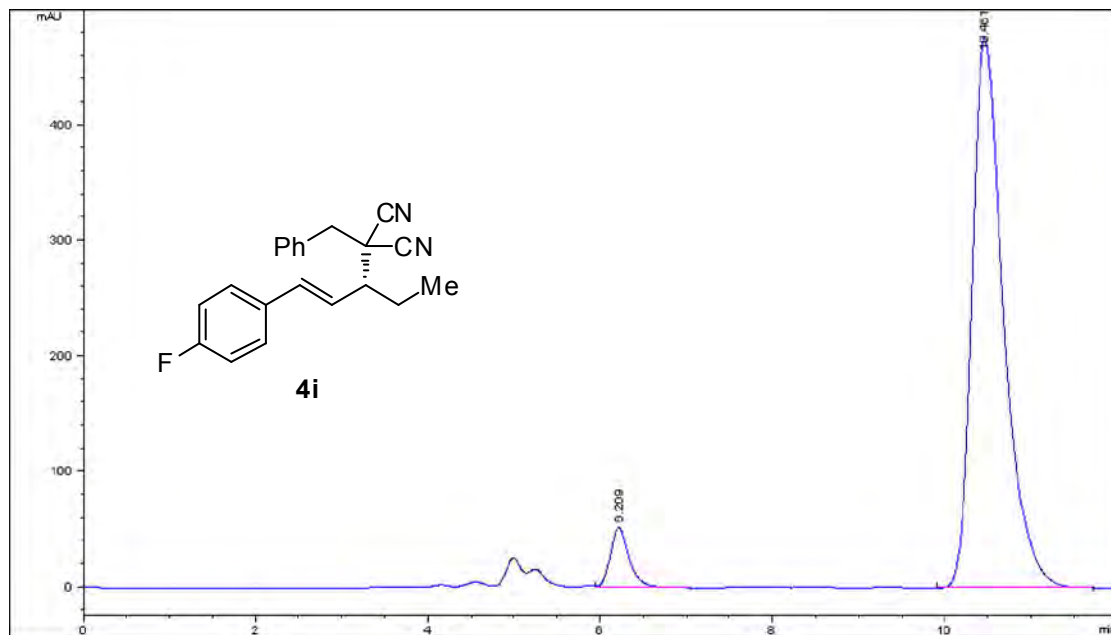

| Number | Time (min) | Area (mAU·s) | Height (mAU) | Width (min) | Symmetry factor | Area (%) |
|--------|------------|--------------|--------------|-------------|-----------------|----------|
| 1      | 6.209      | 803.9        | 52.6         | 0.2291      | 0.731           | 6.239    |
| 2      | 10.461     | 12082.5      | 476.8        | 0.3816      | 0.641           | 93.761   |

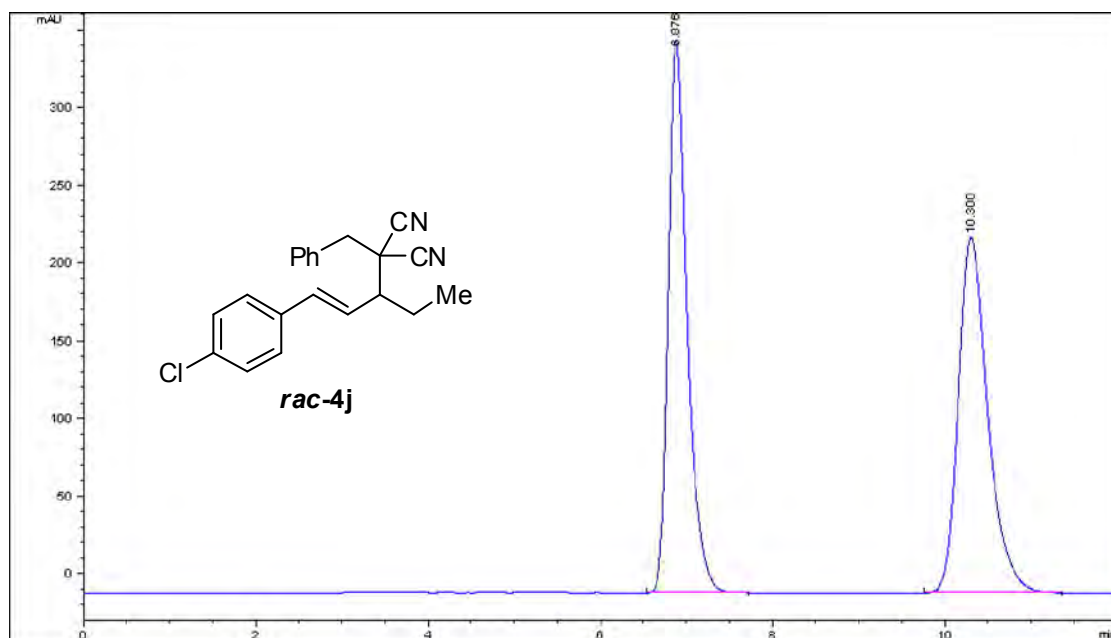

| Number | Time (min) | Area (mAU·s) | Height (mAU) | Width (min) | Symmetry factor | Area (%) |
|--------|------------|--------------|--------------|-------------|-----------------|----------|
| 1      | 6.876      | 5425.5       | 355.6        | 0.2304      | 0.677           | 49.978   |
| 2      | 10.3       | 5430.2       | 228.5        | 0.3602      | 0.716           | 50.022   |

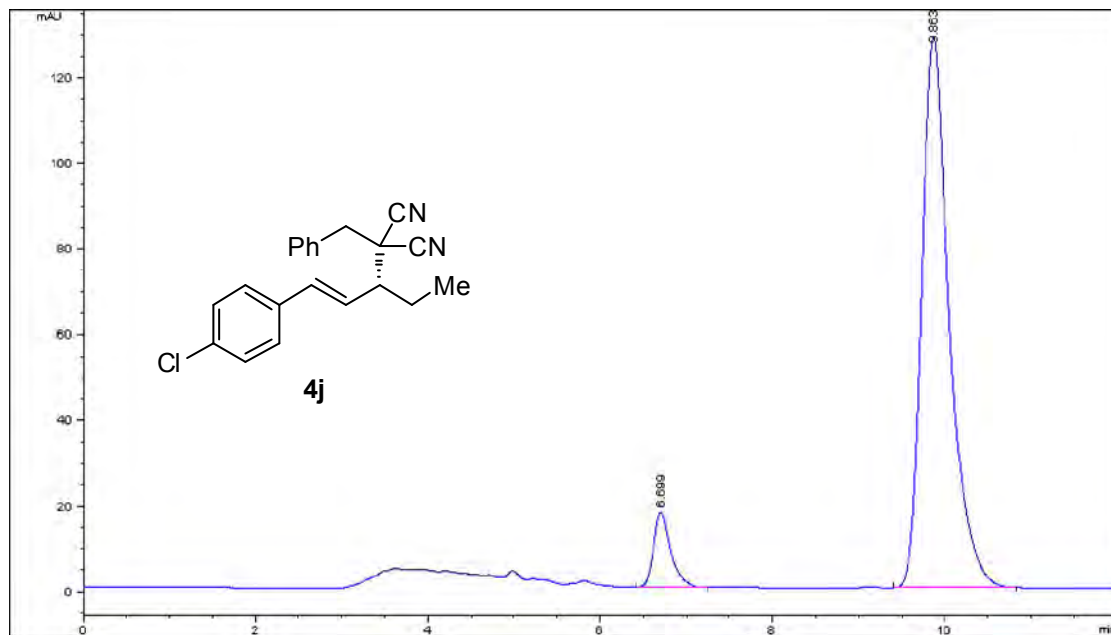

| Number | Time (min) | Area (mAU·s) | Height (mAU) | Width (min) | Symmetry factor | Area (%) |
|--------|------------|--------------|--------------|-------------|-----------------|----------|
| 1      | 6.699      | 246.1        | 17.6         | 0.2065      | 0.692           | 7.957    |
| 2      | 9.863      | 2847.2       | 128.6        | 0.3226      | 0.681           | 92.043   |

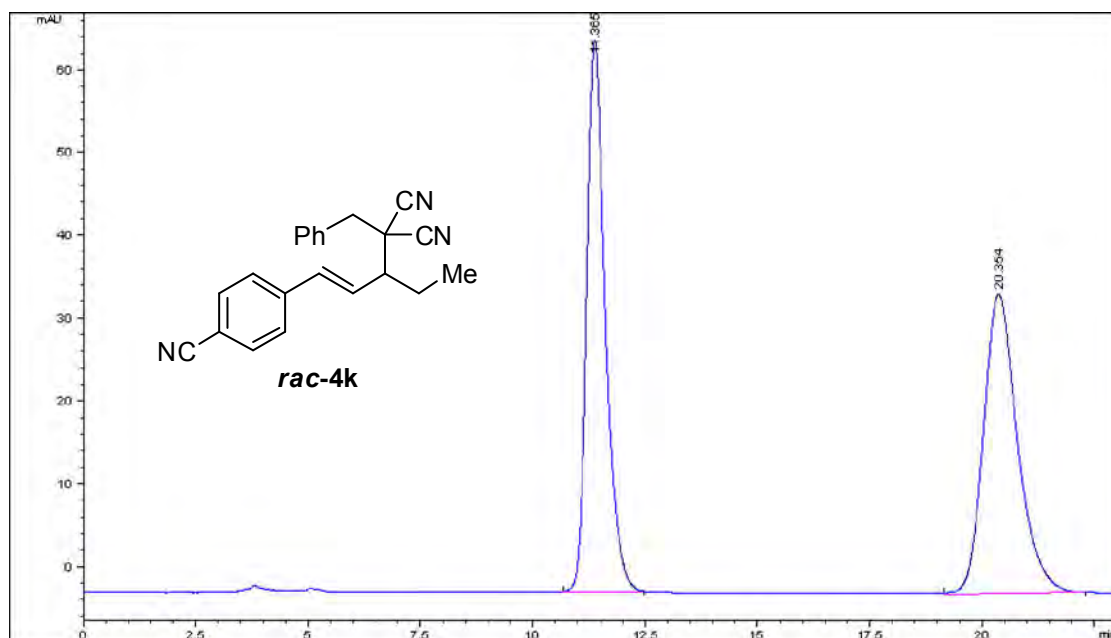

| Number | Time (min) | Area (mAU·s) | Height (mAU) | Width (min) | Symmetry factor | Area (%) |
|--------|------------|--------------|--------------|-------------|-----------------|----------|
| 1      | 11.365     | 1917.2       | 66.6         | 0.4346      | 0.695           | 50.138   |
| 2      | 20.354     | 1906.6       | 36.2         | 0.8788      | 0.77            | 49.862   |

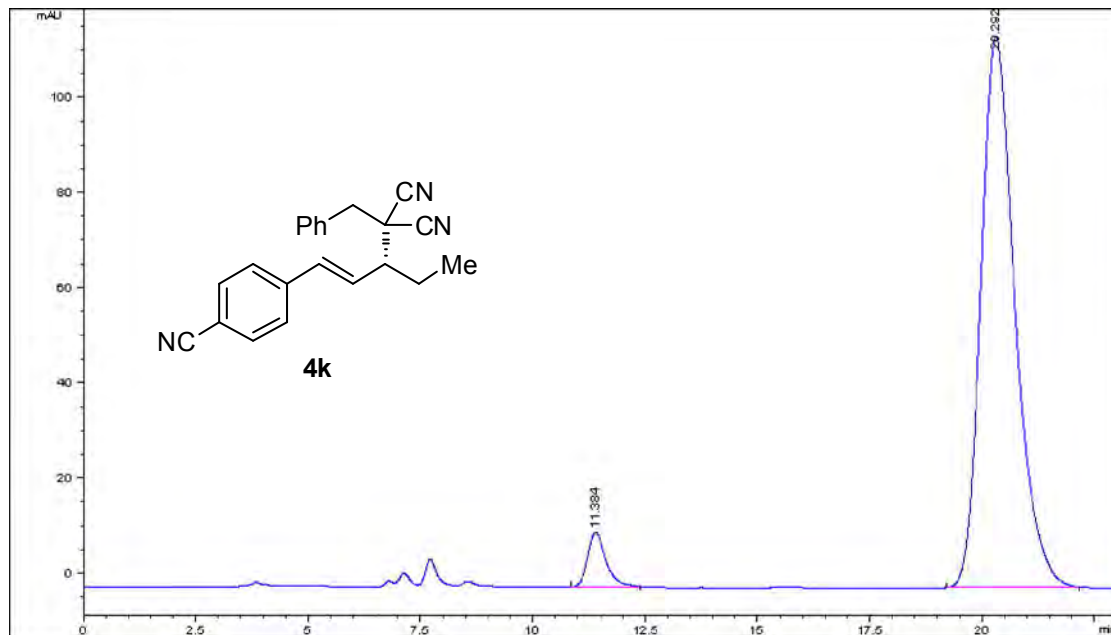

| Number | Time (min) | Area (mAU·s) | Height (mAU) | Width (min) | Symmetry factor | Area (%) |
|--------|------------|--------------|--------------|-------------|-----------------|----------|
| 1      | 11.384     | 328          | 11.5         | 0.4341      | 0.701           | 5.112    |
| 2      | 20.292     | 6088.3       | 115.8        | 0.7996      | 0.729           | 94.888   |

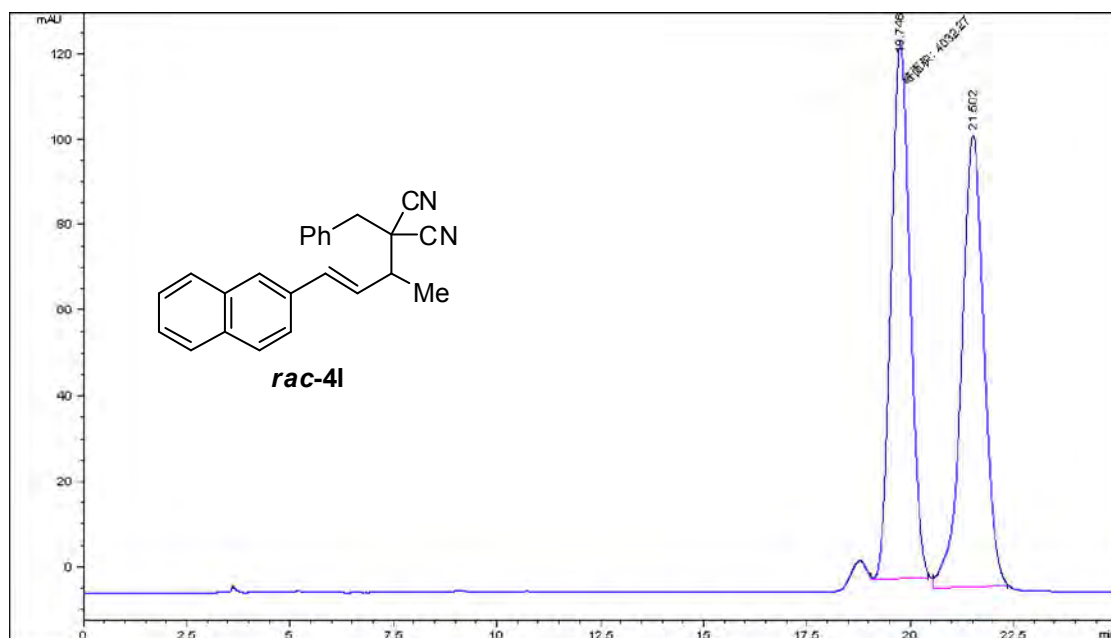

| Number | Time (min) | Area (mAU·s) | Height (mAU) | Width (min) | Symmetry factor | Area (%) |
|--------|------------|--------------|--------------|-------------|-----------------|----------|
| 1      | 19.746     | 4032.3       | 126.1        | 0.5327      | 0.923           | 50.300   |
| 2      | 21.502     | 3984.2       | 105.6        | 0.6288      | 1.02            | 49.700   |

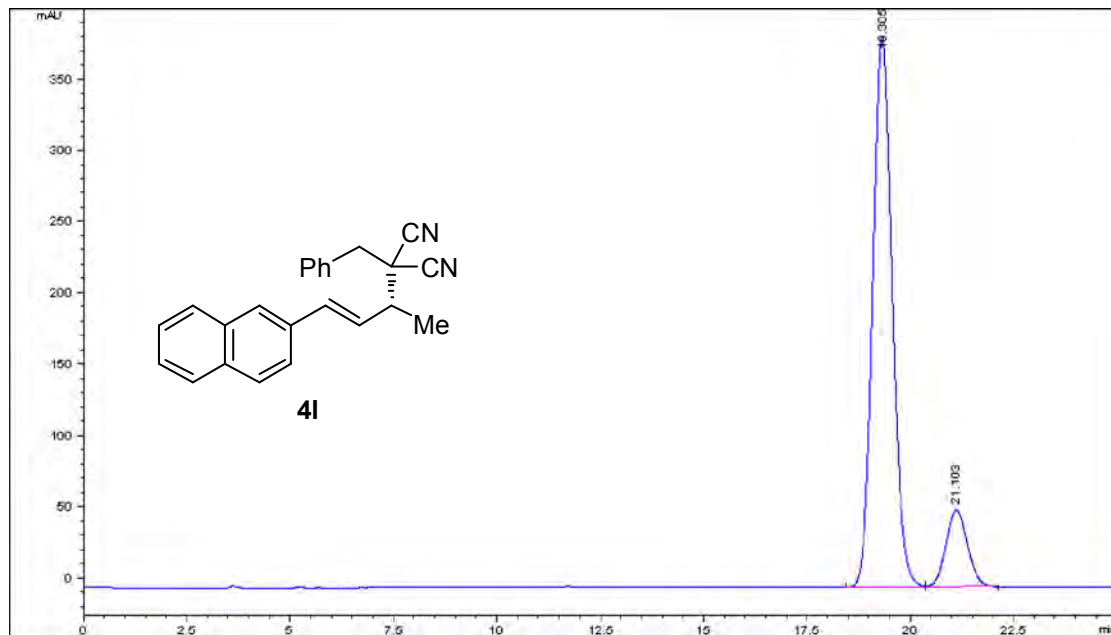

| Number | Time (min) | Area (mAU·s) | Height (mAU) | Width (min) | Symmetry factor | Area (%) |
|--------|------------|--------------|--------------|-------------|-----------------|----------|
| 1      | 19.305     | 12671        | 386.3        | 0.5079      | 0.881           | 86.836   |
| 2      | 21.103     | 1954.5       | 54.1         | 0.5597      | 0.909           | 13.364   |



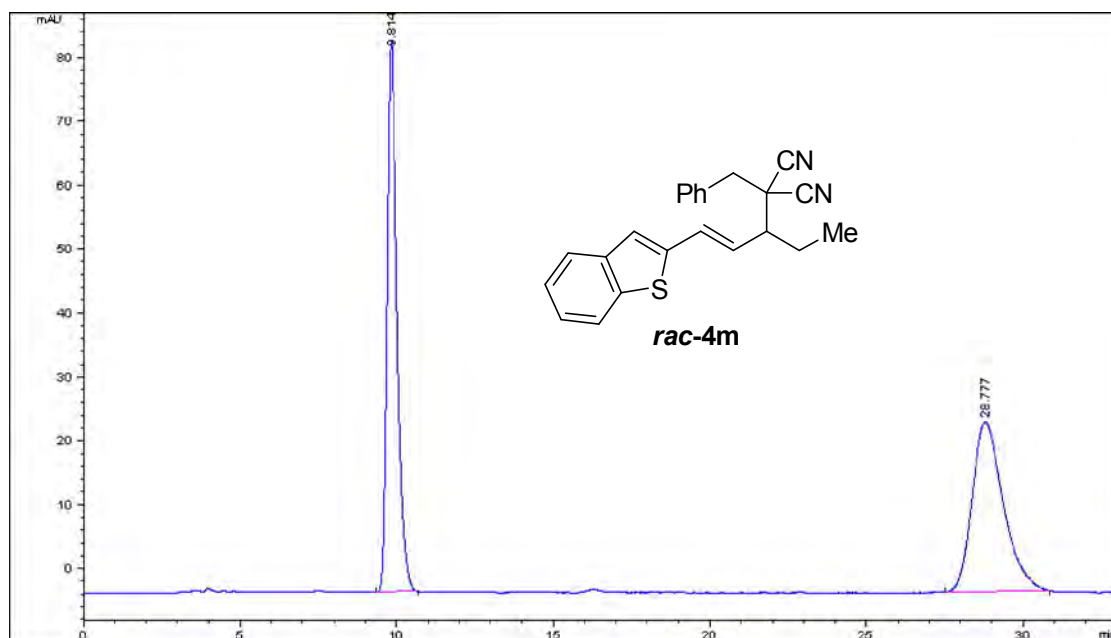

| Number | Time (min) | Area (mAU·s) | Height (mAU) | Width (min) | Symmetry factor | Area (%) |
|--------|------------|--------------|--------------|-------------|-----------------|----------|
| 1      | 9.814      | 1876.8       | 86.4         | 0.3227      | 0.687           | 50.386   |
| 2      | 28.777     | 1848.1       | 26.6         | 1.0474      | 0.692           | 49.614   |

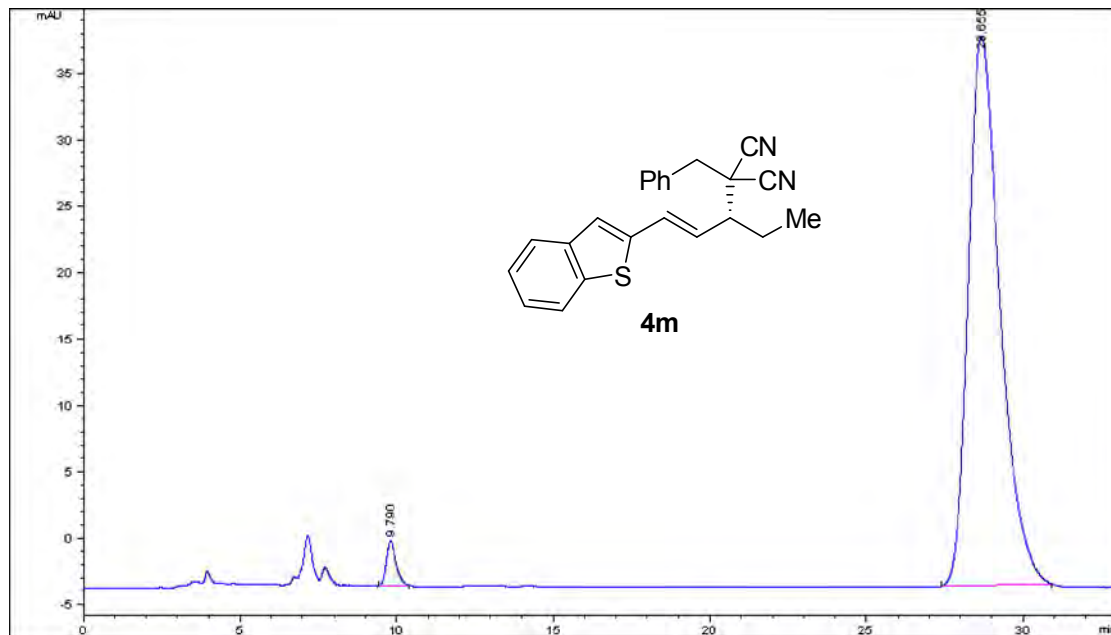

| Number | Time (min) | Area (mAU·s) | Height (mAU) | Width (min) | Symmetry factor | Area (%) |
|--------|------------|--------------|--------------|-------------|-----------------|----------|
| 1      | 9.79       | 72.8         | 3.4          | 0.3201      | 0.706           | 2.433    |
| 2      | 28.655     | 2917.9       | 41.4         | 1.0738      | 0.663           | 97.567   |

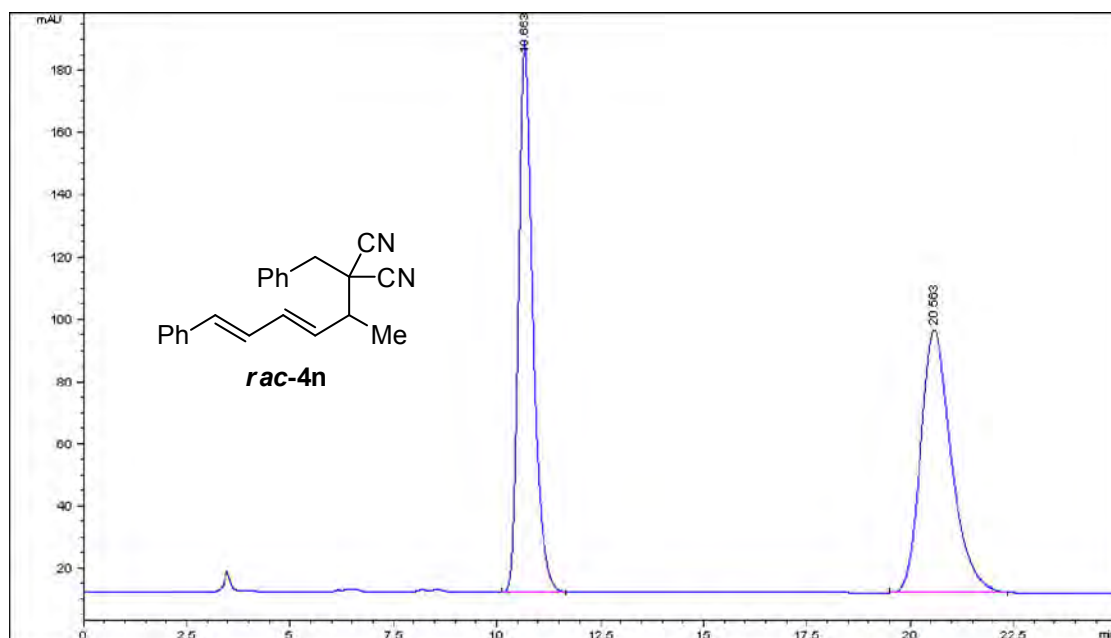

| Number | Time (min) | Area (mAU·s) | Height (mAU) | Width (min) | Symmetry factor | Area (%) |
|--------|------------|--------------|--------------|-------------|-----------------|----------|
| 1      | 10.663     | 4322.9       | 177.4        | 0.3688      | 0.713           | 49.952   |
| 2      | 20.563     | 4331.2       | 84.3         | 0.7845      | 0.733           | 50.048   |

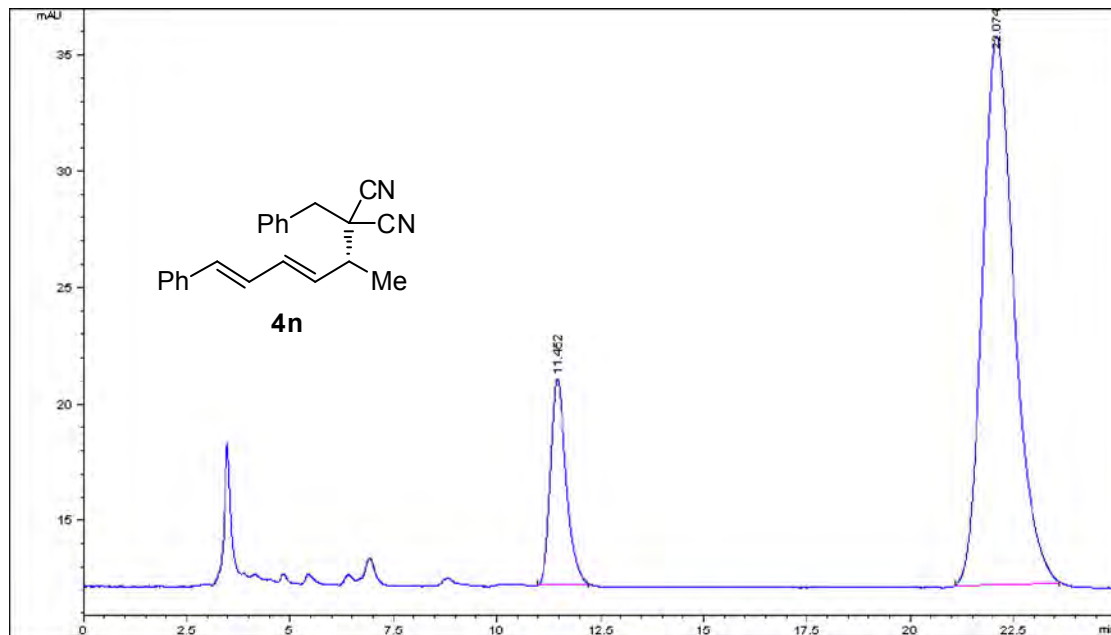

| Number | Time (min) | Area (mAU·s) | Height (mAU) | Width (min) | Symmetry factor | Area (%) |
|--------|------------|--------------|--------------|-------------|-----------------|----------|
| 1      | 11.452     | 234.5        | 8.9          | 0.4         | 0.732           | 15.657   |
| 2      | 22.074     | 1263.2       | 23.6         | 0.8067      | 0.76            | 84.343   |

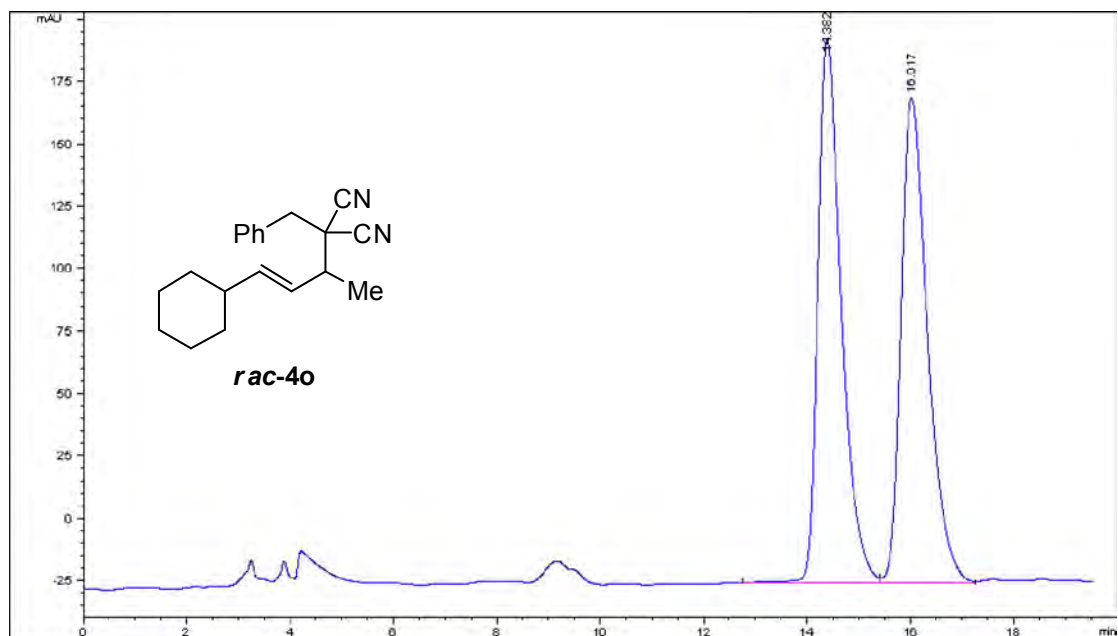

| Number | Time (min) | Area (mAU·s) | Height (mAU) | Width (min) | Symmetry factor | Area (%) |
|--------|------------|--------------|--------------|-------------|-----------------|----------|
| 1      | 14.382     | 6898.4       | 218.2        | 0.4767      | 0.616           | 49.847   |
| 2      | 16.017     | 6940.8       | 194.6        | 0.5427      | 0.625           | 50.153   |

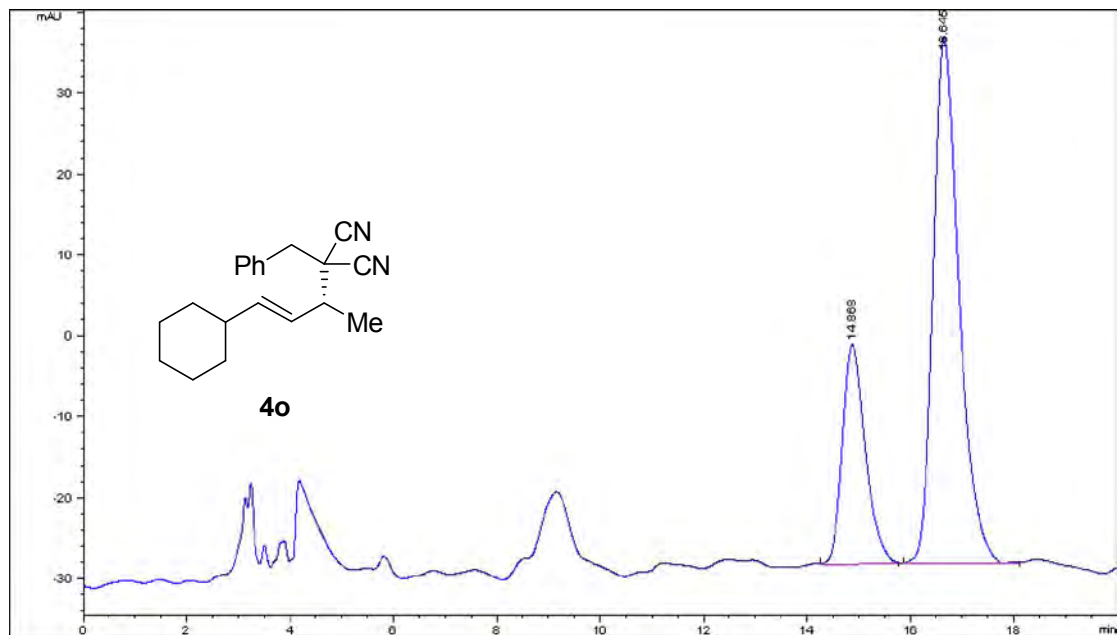

| Number | Time (min) | Area (mAU·s) | Height (mAU) | Width (min) | Symmetry factor | Area (%) |
|--------|------------|--------------|--------------|-------------|-----------------|----------|
| 1      | 14.868     | 847.3        | 27.2         | 0.519       | 0.735           | 27.101   |
| 2      | 16.645     | 2279.1       | 65.1         | 0.5831      | 0.706           | 72.899   |

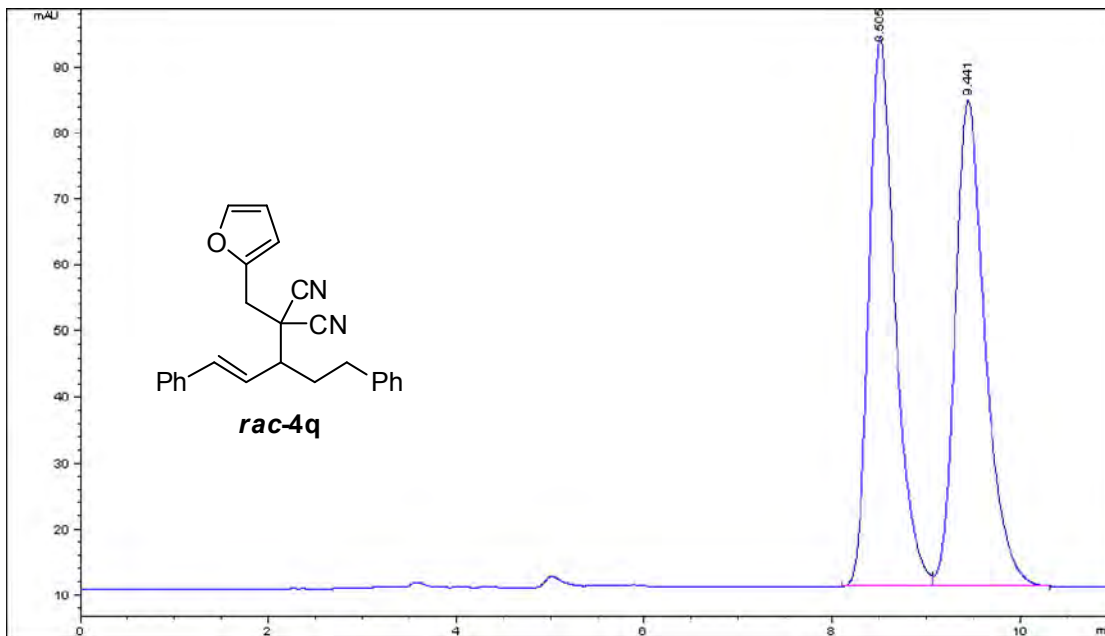

| Number | Time (min) | Area (mAU·s) | Height (mAU) | Width (min) | Symmetry factor | Area (%) |
|--------|------------|--------------|--------------|-------------|-----------------|----------|
| 1      | 8.505      | 1616.8       | 83.3         | 0.2933      | 0.7             | 49.785   |
| 2      | 9.441      | 1630.7       | 73.6         | 0.3343      | 0.704           | 50.215   |

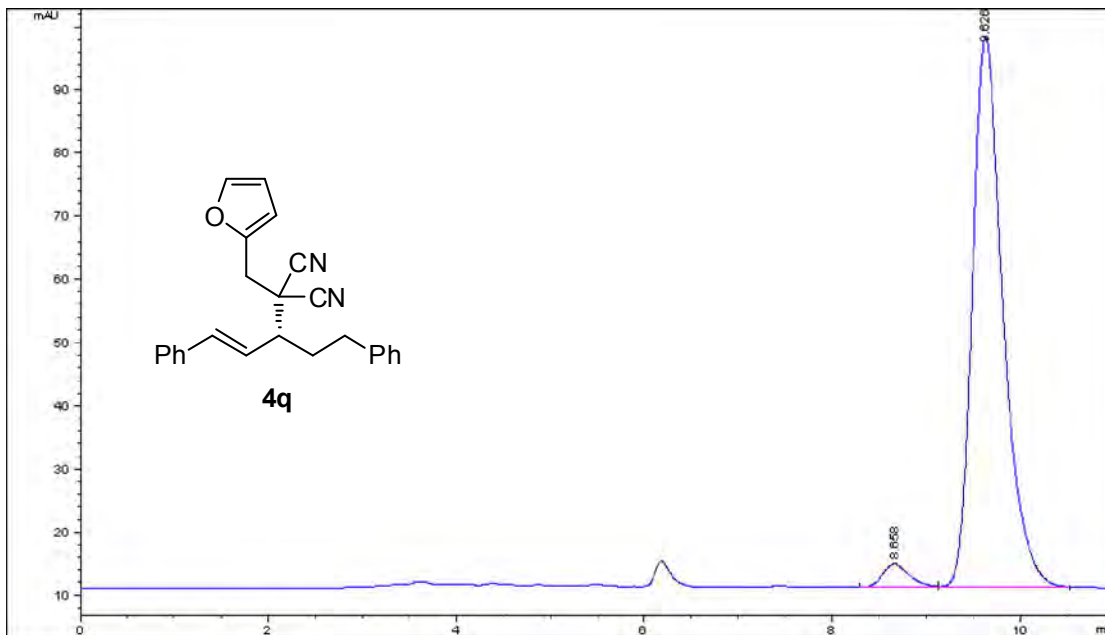

| Number | Time (min) | Area (mAU·s) | Height (mAU) | Width (min) | Symmetry factor | Area (%) |
|--------|------------|--------------|--------------|-------------|-----------------|----------|
| 1      | 8.658      | 73.4         | 3.7          | 0.2992      | 0.733           | 3.581    |
| 2      | 9.626      | 1976.8       | 87.3         | 0.3429      | 0.698           | 96.419   |

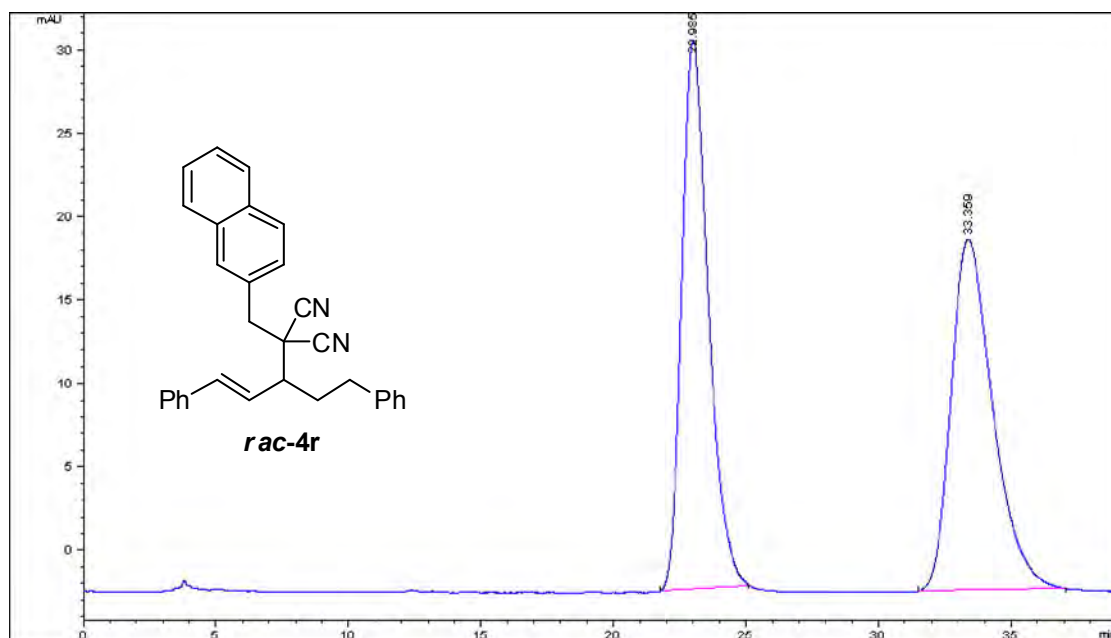

| Number | Time (min) | Area (mAU·s) | Height (mAU) | Width (min) | Symmetry factor | Area (%) |
|--------|------------|--------------|--------------|-------------|-----------------|----------|
| 1      | 22.985     | 2304.8       | 33           | 1.0545      | 0.69            | 49.938   |
| 2      | 33.359     | 2310.5       | 21.1         | 1.8287      | 0.665           | 50.062   |

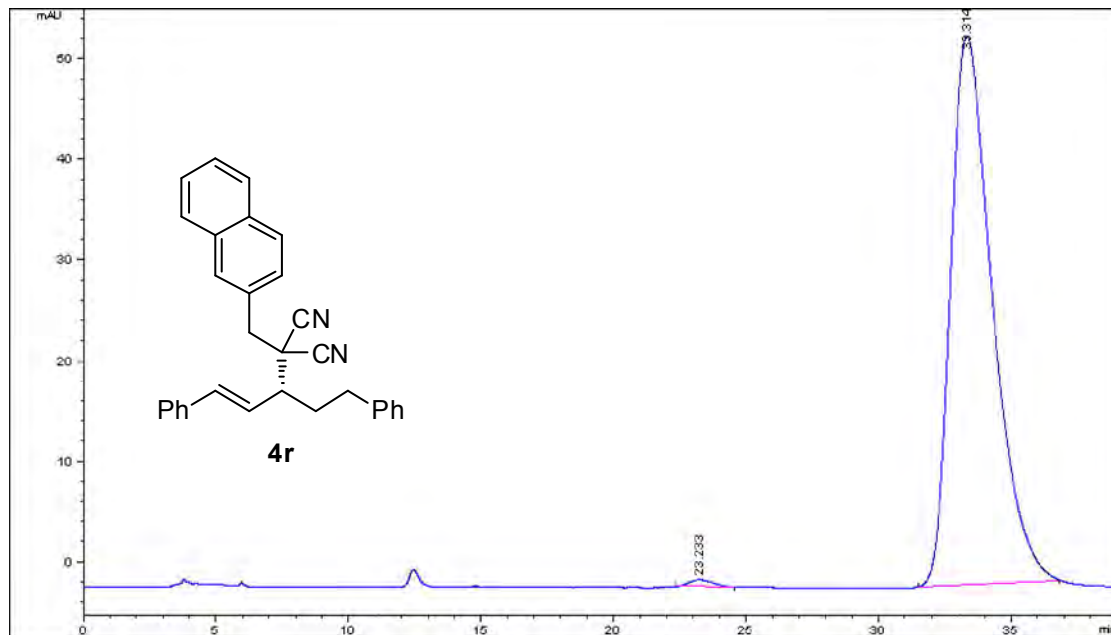

| Number | Time (min) | Area (mAU·s) | Height (mAU) | Width (min) | Symmetry factor | Area (%) |
|--------|------------|--------------|--------------|-------------|-----------------|----------|
| 1      | 23.233     | 44.6         | 7E-1         | 1.0614      | 0.822           | 0.740    |
| 2      | 33.314     | 5981.5       | 54.6         | 1.6235      | 0.602           | 99.260   |

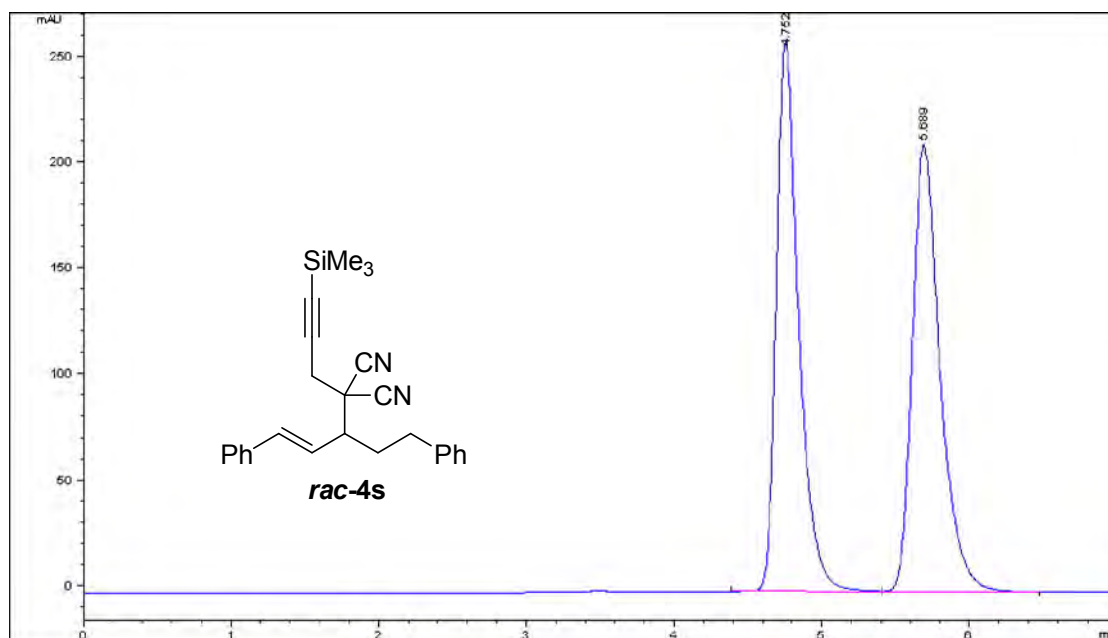

| Number | Time (min) | Area (mAU·s) | Height (mAU) | Width (min) | Symmetry factor | Area (%) |
|--------|------------|--------------|--------------|-------------|-----------------|----------|
| 1      | 4.752      | 2743.4       | 260.4        | 0.1579      | 0.643           | 49.853   |
| 2      | 5.689      | 2759.6       | 211.1        | 0.1962      | 0.669           | 50.147   |

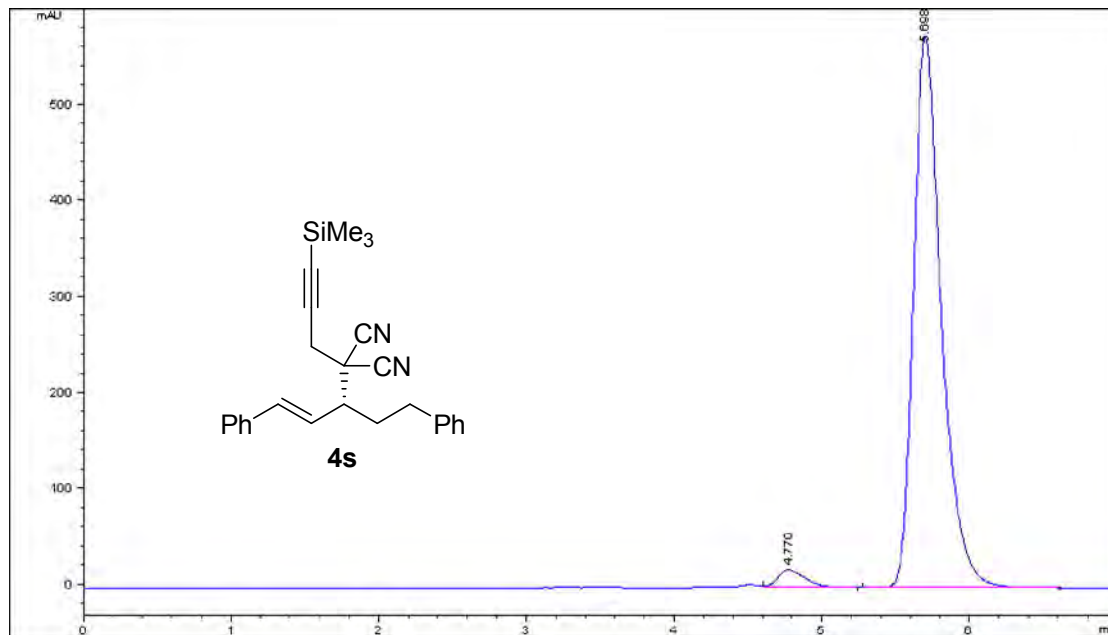

| Number | Time (min) | Area (mAU·s) | Height (mAU) | Width (min) | Symmetry factor | Area (%) |
|--------|------------|--------------|--------------|-------------|-----------------|----------|
| 1      | 4.77       | 244.5        | 18.9         | 0.2021      | 0.582           | 3.156    |
| 2      | 5.698      | 7502.5       | 574.3        | 0.1961      | 0.669           | 96.844   |

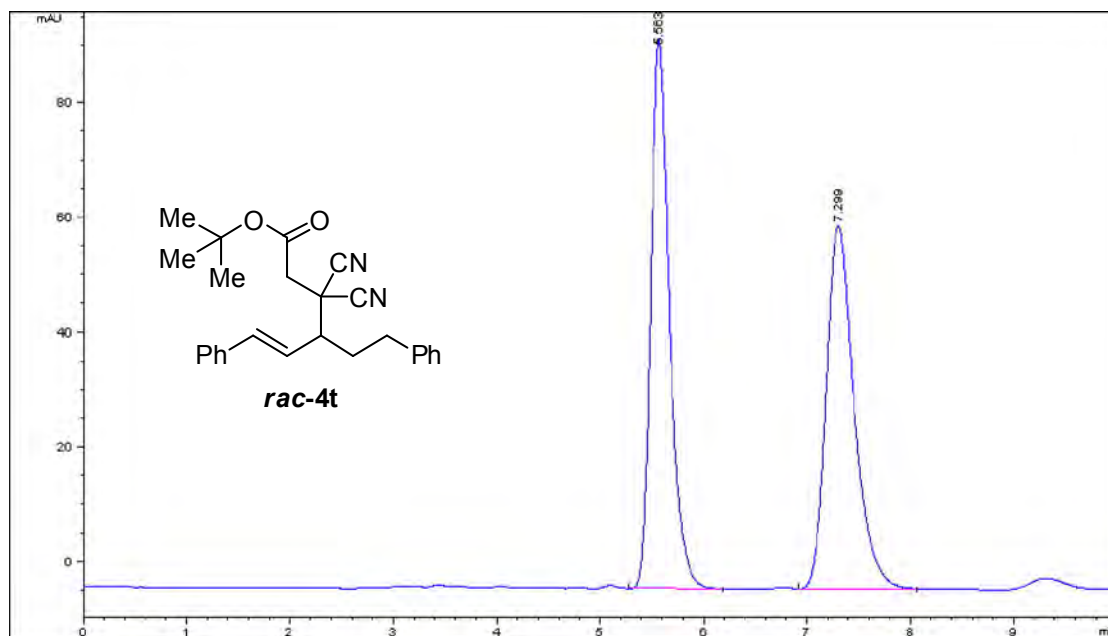

| Number | Time (min) | Area (mAU·s) | Height (mAU) | Width (min) | Symmetry factor | Area (%) |
|--------|------------|--------------|--------------|-------------|-----------------|----------|
| 1      | 5.563      | 1197         | 95.8         | 0.188       | 0.717           | 50.175   |
| 2      | 7.299      | 1188.6       | 63.3         | 0.283       | 0.717           | 49.825   |

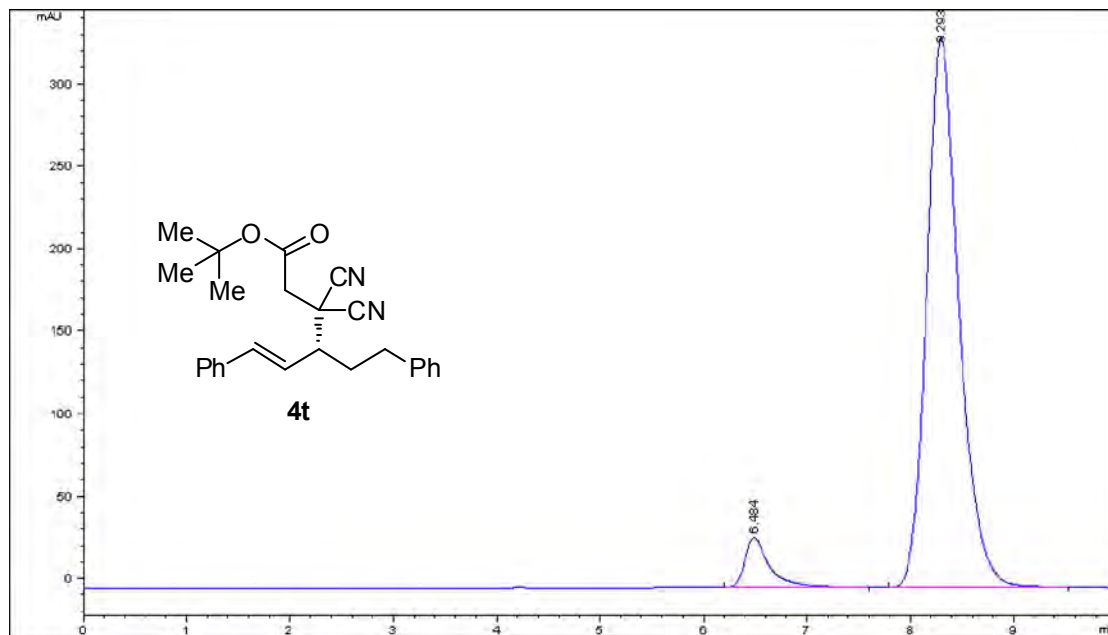

| Number | Time (min) | Area (mAU·s) | Height (mAU) | Width (min) | Symmetry factor | Area (%) |
|--------|------------|--------------|--------------|-------------|-----------------|----------|
| 1      | 6.484      | 514.3        | 30.4         | 0.2456      | 0.528           | 6.631    |
| 2      | 8.293      | 7241.2       | 333.6        | 0.326       | 0.75            | 93.369   |

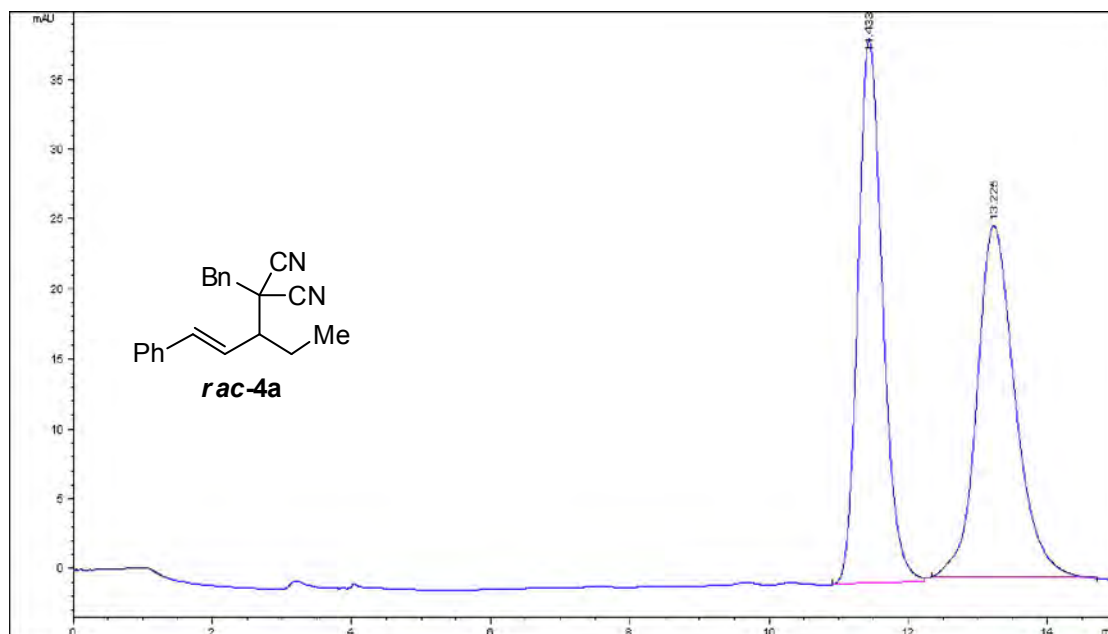

| Number | Time (min) | Area (mAU·s) | Height (mAU) | Width (min) | Symmetry factor | Area (%) |
|--------|------------|--------------|--------------|-------------|-----------------|----------|
| 1      | 11.433     | 958.8        | 39           | 0.3788      | 0.789           | 49.970   |
| 2      | 13.225     | 959.9        | 25.1         | 0.6362      | 0.778           | 50.030   |

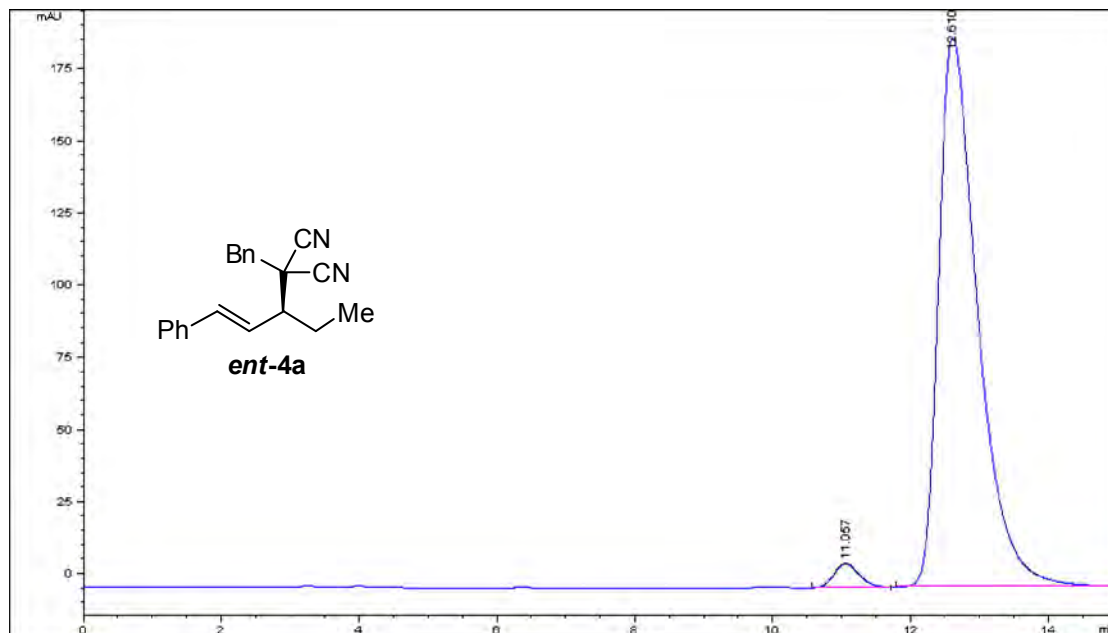

| Number | Time (min) | Area (mAU·s) | Height (mAU) | Width (min) | Symmetry factor | Area (%) |
|--------|------------|--------------|--------------|-------------|-----------------|----------|
| 1      | 11.057     | 208.5        | 8.3          | 0.3934      | 0.83            | 2.700    |
| 2      | 12.61      | 7514.1       | 190.5        | 0.6576      | 0.549           | 97.300   |



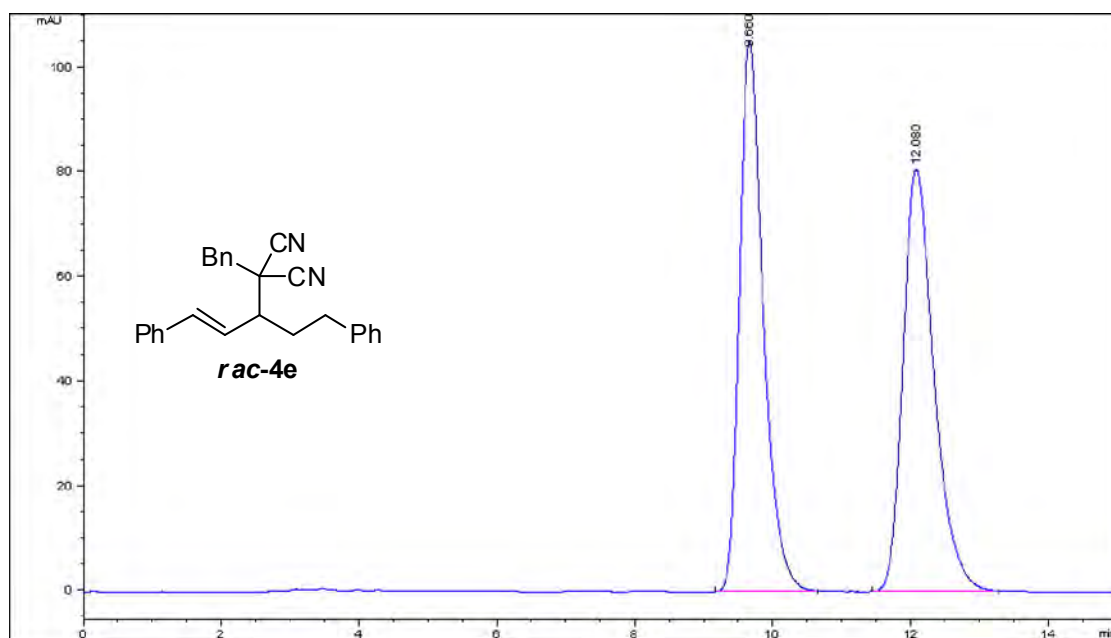

| Number | Time (min) | Area (mAU·s) | Height (mAU) | Width (min) | Symmetry factor | Area (%) |
|--------|------------|--------------|--------------|-------------|-----------------|----------|
| 1      | 9.66       | 2529.1       | 105.2        | 0.3649      | 0.677           | 50.049   |
| 2      | 12.08      | 2524.1       | 80.7         | 0.4785      | 0.693           | 49.951   |

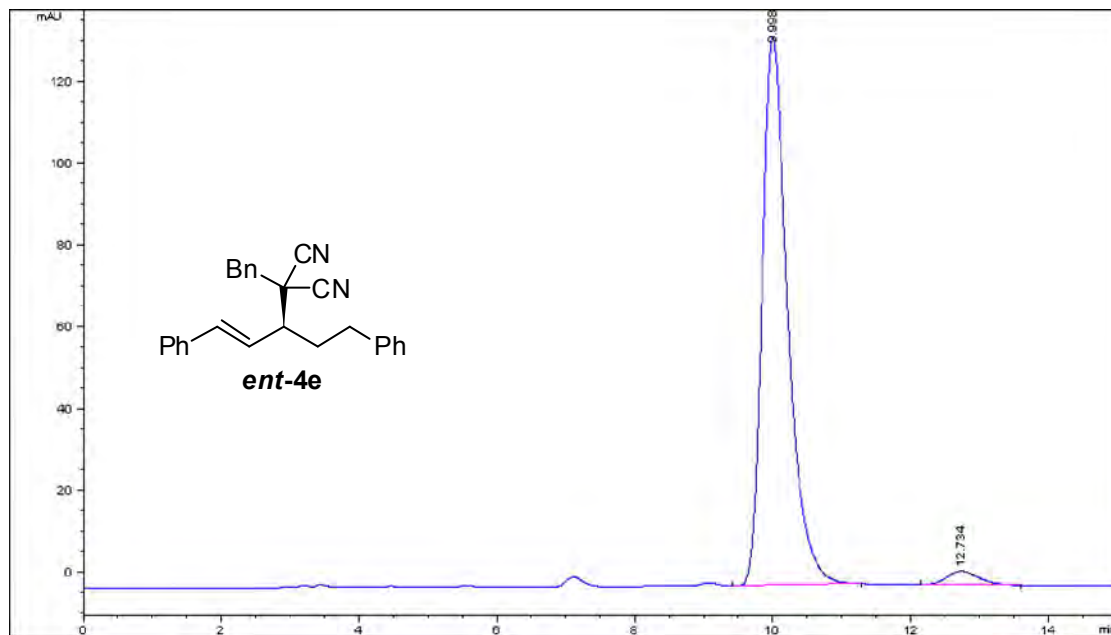

| Number | Time (min) | Area (mAU·s) | Height (mAU) | Width (min) | Symmetry factor | Area (%) |
|--------|------------|--------------|--------------|-------------|-----------------|----------|
| 1      | 9.998      | 3452.7       | 134          | 0.3894      | 0.653           | 96.817   |
| 2      | 12.734     | 113.5        | 3.4          | 0.4906      | 0.782           | 3.183    |

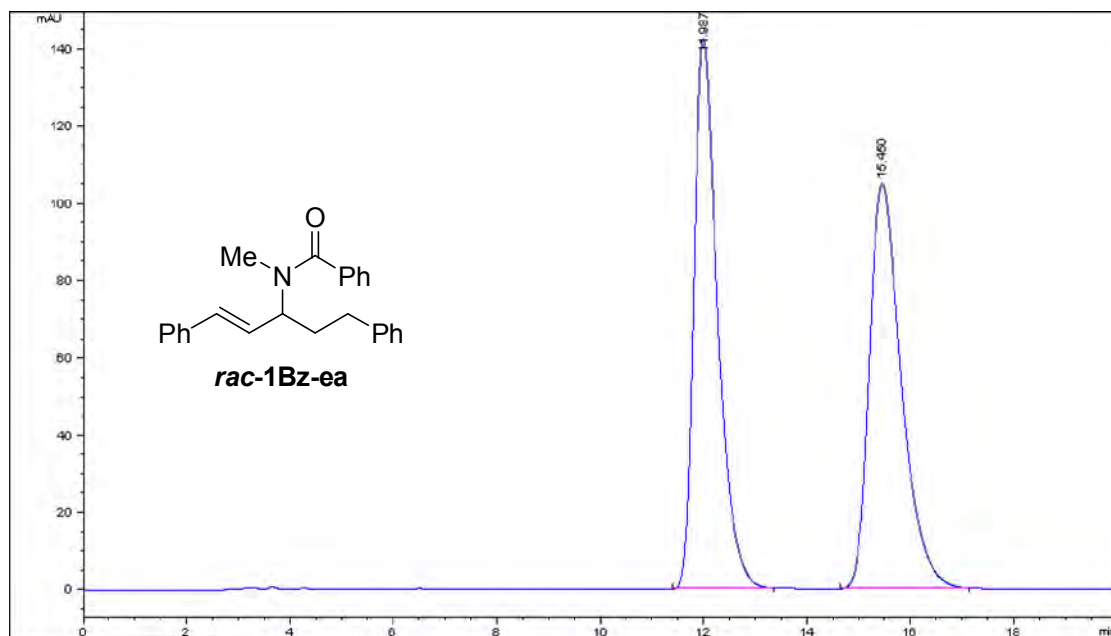

| Number | Time (min) | Area (mAU·s) | Height (mAU) | Width (min) | Symmetry factor | Area (%) |
|--------|------------|--------------|--------------|-------------|-----------------|----------|
| 1      | 11.987     | 4525.8       | 142.2        | 0.4834      | 0.613           | 50.064   |
| 2      | 15.45      | 4514.2       | 104.8        | 0.6541      | 0.637           | 49.936   |

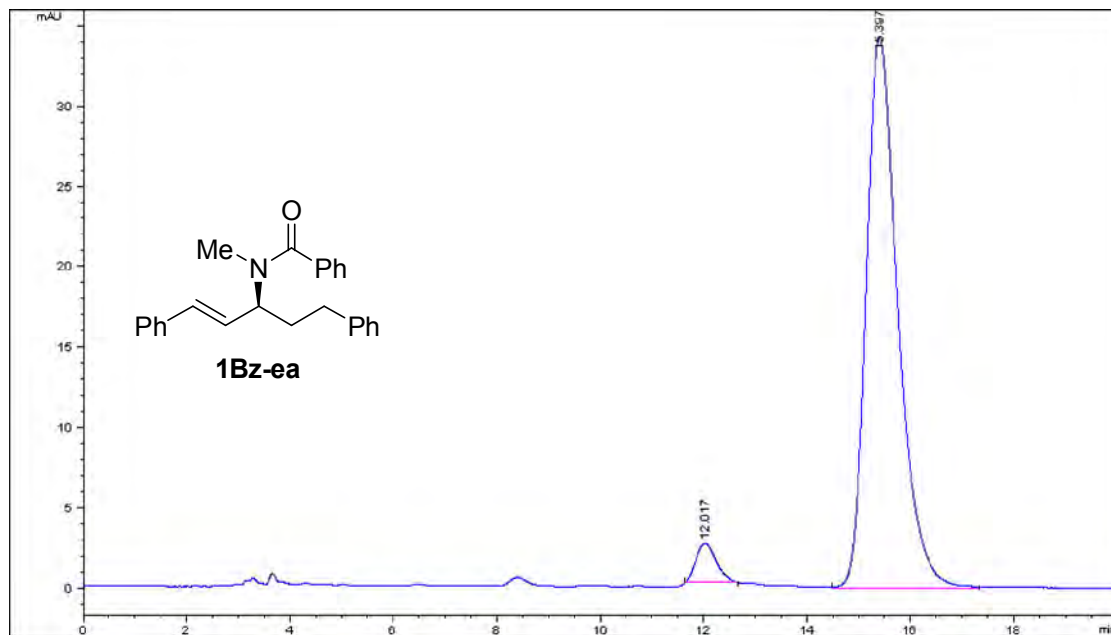

| Number | Time (min) | Area (mAU·s) | Height (mAU) | Width (min) | Symmetry factor | Area (%) |
|--------|------------|--------------|--------------|-------------|-----------------|----------|
| 1      | 12.107     | 66.2         | 2.4          | 0.4593      | 0.754           | 4.313    |
| 2      | 15.397     | 1469.8       | 34.3         | 0.7132      | 0.7             | 95.687   |

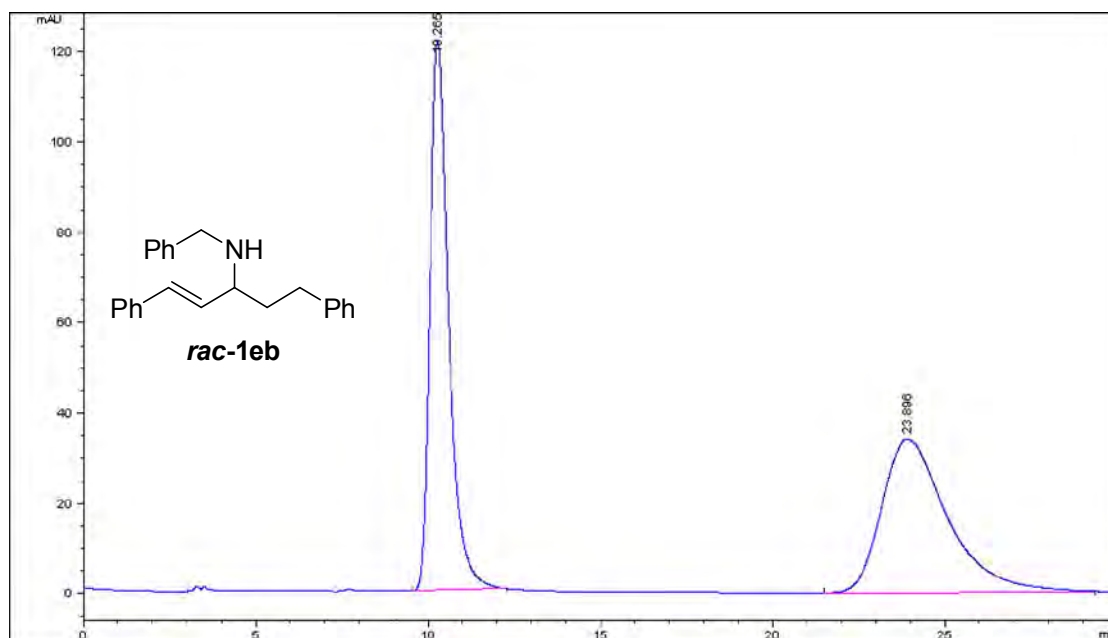

| Number | Time (min) | Area (mAU·s) | Height (mAU) | Width (min) | Symmetry factor | Area (%) |
|--------|------------|--------------|--------------|-------------|-----------------|----------|
| 1      | 10.265     | 4585.9       | 121.8        | 0.5687      | 0.629           | 50.190   |
| 2      | 23.896     | 455.1        | 34.2         | 2.2187      | 0.609           | 49.810   |

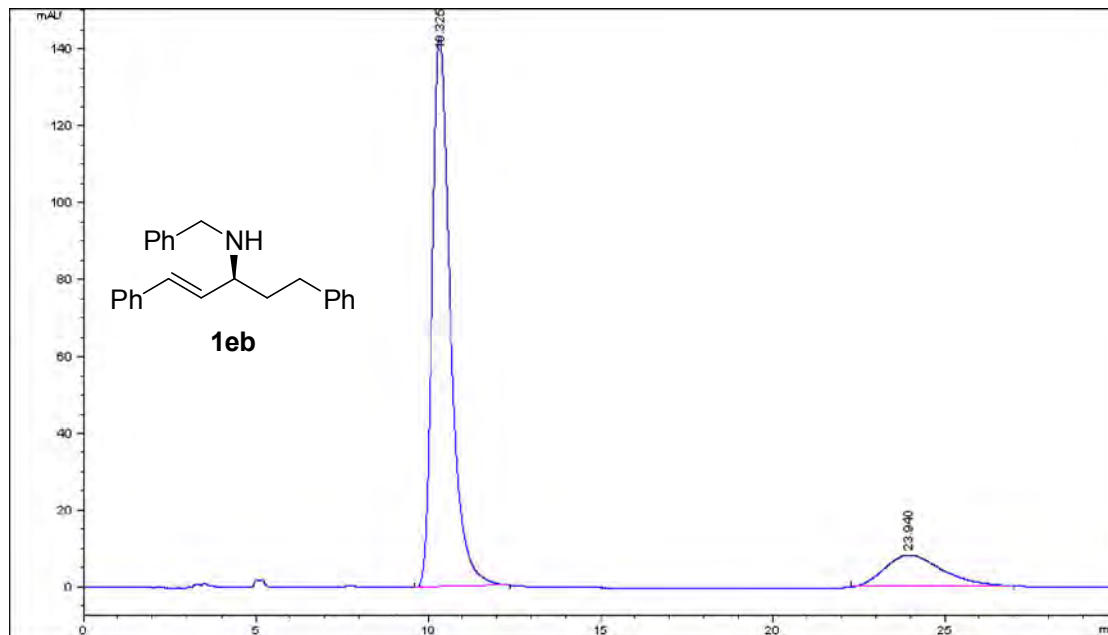

| Number | Time (min) | Area (mAU·s) | Height (mAU) | Width (min) | Symmetry factor | Area (%) |
|--------|------------|--------------|--------------|-------------|-----------------|----------|
| 1      | 10.325     | 5266.5       | 143.3        | 0.554       | 0.635           | 84.784   |
| 2      | 23.94      | 945.1        | 8.1          | 1.946       | 0.695           | 15.216   |

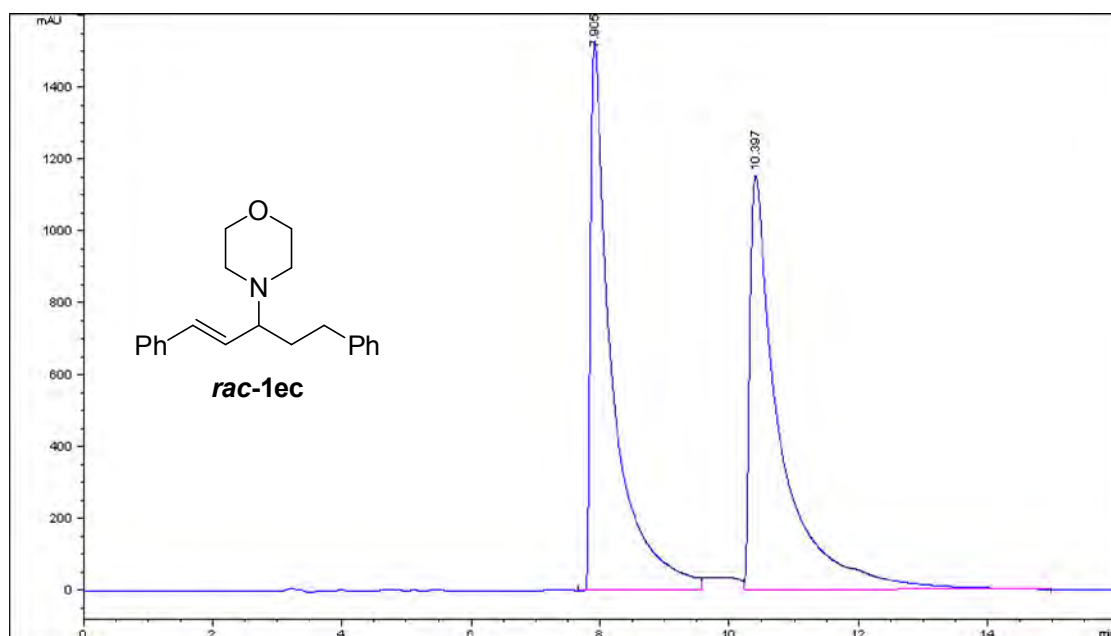

| Number | Time (min) | Area (mAU·s) | Height (mAU) | Width (min) | Symmetry factor | Area (%) |
|--------|------------|--------------|--------------|-------------|-----------------|----------|
| 1      | 7.905      | 35901.3      | 1528.6       | 0.3206      | 0.204           | 49.056   |
| 2      | 10.397     | 37282.6      | 1154.3       | 0.4394      | 0.195           | 50.944   |

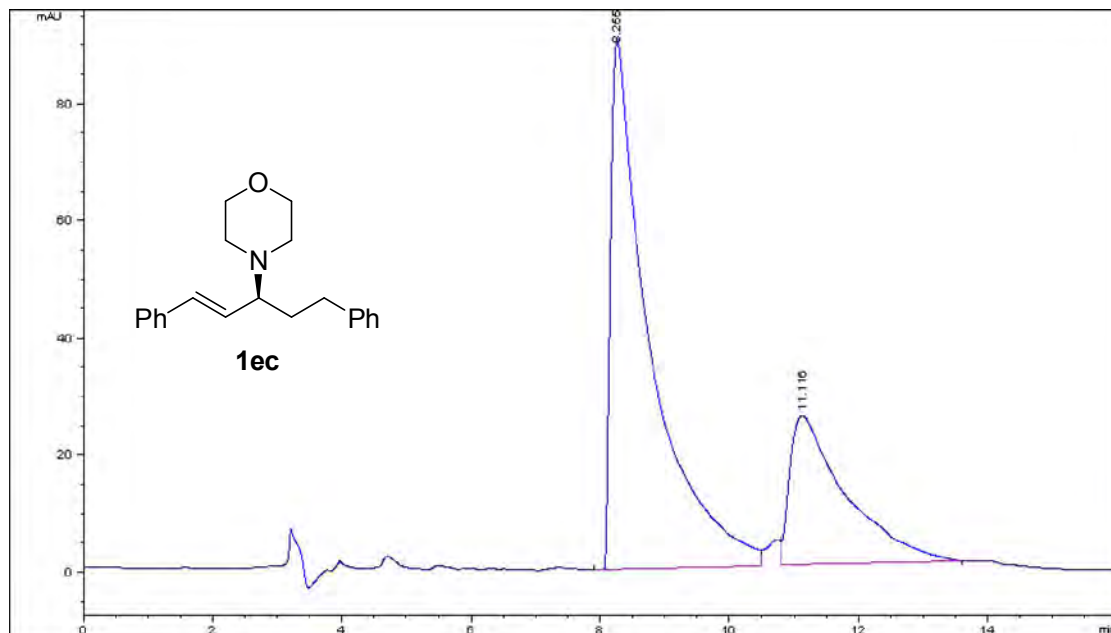

| Number | Time (min) | Area (mAU·s) | Height (mAU) | Width (min) | Symmetry factor | Area (%) |
|--------|------------|--------------|--------------|-------------|-----------------|----------|
| 1      | 8.255      | 3833.8       | 90.9         | 0.5634      | 0.179           | 71.410   |
| 2      | 11.116     | 1534.9       | 25.5         | 0.8432      | 0.254           | 28.590   |
